# Supplementary material for: Analysis of 94 Candidate Genes and 12 Endophenotypes for Schizophrenia From the Consortium on the Genetics of Schizophrenia
Source: Atypon-hosted journal article supplement (doi:10.1176/appi.ajp.2011.10050723), 2011-04-16
Supplement: ajp_168_09_930_01.pdf [file ajp_168_09_930_01.pdf]

Complete list of all 94 genes and 1,536 SNPs present on the COGS SNP Chip

|    | A        | B         | C          | D                                                         | E         | F     | G          | H             | I      | J      |
|----|----------|-----------|------------|-----------------------------------------------------------|-----------|-------|------------|---------------|--------|--------|
| 1  | Cytoband | Gene Name | Gene Alias | Description                                               | Size (kb) | Chrom | SNP ID     | Position (bp) | htSNP* | Coding |
| 2  | 1p36.13  | HTR6      | 5-HT6      | 5-hydroxytryptamine (serotonin) receptor 6                | 14.3      | 1     | rs9064     | 19881467      | T      |        |
| 3  | 1p34.3   | GRIK3     | GLUR7      | glutamate receptor, ionotropic, kainate 3                 | 238.7     | 1     | rs517176   | 37067995      | T      |        |
| 4  | 1p34.3   | GRIK3     | GLUR7      | glutamate receptor, ionotropic, kainate 3                 | 238.7     | 1     | rs570743   | 37076603      | T      |        |
| 5  | 1p34.3   | GRIK3     | GLUR7      | glutamate receptor, ionotropic, kainate 3                 | 238.7     | 1     | rs3767045  | 37083256      | T      |        |
| 6  | 1p34.3   | GRIK3     | GLUR7      | glutamate receptor, ionotropic, kainate 3                 | 238.7     | 1     | rs904896   | 37093554      | T      |        |
| 7  | 1p34.3   | GRIK3     | GLUR7      | glutamate receptor, ionotropic, kainate 3                 | 238.7     | 1     | rs12067006 | 37097522      | T      |        |
| 8  | 1p34.3   | GRIK3     | GLUR7      | glutamate receptor, ionotropic, kainate 3                 | 238.7     | 1     | rs1392745  | 37106082      | T      |        |
| 9  | 1p34.3   | GRIK3     | GLUR7      | glutamate receptor, ionotropic, kainate 3                 | 238.7     | 1     | rs533337   | 37113564      | T      |        |
| 10 | 1p34.3   | GRIK3     | GLUR7      | glutamate receptor, ionotropic, kainate 3                 | 238.7     | 1     | rs1587526  | 37135063      | T      |        |
| 11 | 1p34.3   | GRIK3     | GLUR7      | glutamate receptor, ionotropic, kainate 3                 | 238.7     | 1     | rs1027599  | 37164007      | T      |        |
| 12 | 1p34.3   | GRIK3     | GLUR7      | glutamate receptor, ionotropic, kainate 3                 | 238.7     | 1     | rs1334804  | 37167831      | T      |        |
| 13 | 1p34.3   | GRIK3     | GLUR7      | glutamate receptor, ionotropic, kainate 3                 | 238.7     | 1     | rs7555221  | 37170848      | T      |        |
| 14 | 1p34.3   | GRIK3     | GLUR7      | glutamate receptor, ionotropic, kainate 3                 | 238.7     | 1     | rs7517274  | 37174588      | T      |        |
| 15 | 1p34.3   | GRIK3     | GLUR7      | glutamate receptor, ionotropic, kainate 3                 | 238.7     | 1     | rs1160752  | 37175999      | T      |        |
| 16 | 1p34.3   | GRIK3     | GLUR7      | glutamate receptor, ionotropic, kainate 3                 | 238.7     | 1     | rs3767078  | 37177505      | T      |        |
| 17 | 1p34.3   | GRIK3     | GLUR7      | glutamate receptor, ionotropic, kainate 3                 | 238.7     | 1     | rs3767087  | 37188856      | T      |        |
| 18 | 1p34.3   | GRIK3     | GLUR7      | glutamate receptor, ionotropic, kainate 3                 | 238.7     | 1     | rs3767088  | 37189748      | T      |        |
| 19 | 1p34.3   | GRIK3     | GLUR7      | glutamate receptor, ionotropic, kainate 3                 | 238.7     | 1     | rs535620   | 37192428      | T      |        |
| 20 | 1p34.3   | GRIK3     | GLUR7      | glutamate receptor, ionotropic, kainate 3                 | 238.7     | 1     | rs10489412 | 37206210      | T      |        |
| 21 | 1p34.3   | GRIK3     | GLUR7      | glutamate receptor, ionotropic, kainate 3                 | 238.7     | 1     | rs697923   | 37207734      | T      |        |
| 22 | 1p34.3   | GRIK3     | GLUR7      | glutamate receptor, ionotropic, kainate 3                 | 238.7     | 1     | rs575605   | 37210363      | T      |        |
| 23 | 1p34.3   | GRIK3     | GLUR7      | glutamate receptor, ionotropic, kainate 3                 | 238.7     | 1     | rs12066663 | 37228066      | T      |        |
| 24 | 1p34.3   | GRIK3     | GLUR7      | glutamate receptor, ionotropic, kainate 3                 | 238.7     | 1     | rs12746787 | 37229889      | T      |        |
| 25 | 1p34.1   | SLC6A9    | GLYT1      | solute carrier family 6, member 9 (glycine transporter)   | 35.0      | 1     | rs1362153  | 44241618      | T      |        |
| 26 | 1p34.1   | SLC6A9    | GLYT1      | solute carrier family 6, member 9 (glycine transporter)   | 35.0      | 1     | rs6660227  | 44243365      | T      |        |
| 27 | 1p34.1   | SLC6A9    | GLYT1      | solute carrier family 6, member 9 (glycine transporter)   | 35.0      | 1     | rs6670336  | 44243903      | T      |        |
| 28 | 1p34.1   | SLC6A9    | GLYT1      | solute carrier family 6, member 9 (glycine transporter)   | 35.0      | 1     | rs2486000  | 44250594      | T      |        |
| 29 | 1p34.1   | SLC6A9    | GLYT1      | solute carrier family 6, member 9 (glycine transporter)   | 35.0      | 1     | rs6429644  | 44259867      | T      |        |
| 30 | 1p32.3   | SLC1A7    | AAAT       | solute carrier family 1, member 7 (glutamate transporter) | 55.4      | 1     | rs899974   | 53322775      | T      |        |
| 31 | 1p32.3   | SLC1A7    | AAAT       | solute carrier family 1, member 7 (glutamate transporter) | 55.4      | 1     | rs1288403  | 53328371      | T      |        |
| 32 | 1p32.3   | SLC1A7    | AAAT       | solute carrier family 1, member 7 (glutamate transporter) | 55.4      | 1     | rs3766775  | 53340134      | T      |        |
| 33 | 1p32.3   | SLC1A7    | AAAT       | solute carrier family 1, member 7 (glutamate transporter) | 55.4      | 1     | rs1288369  | 53348163      | T      |        |
| 34 | 1p32.3   | SLC1A7    | AAAT       | solute carrier family 1, member 7 (glutamate transporter) | 55.4      | 1     | rs1288373  | 53351990      | T      |        |
| 35 | 1p32.3   | SLC1A7    | AAAT       | solute carrier family 1, member 7 (glutamate transporter) | 55.4      | 1     | rs1769299  | 53358311      | T      |        |
| 36 | 1p32.3   | SLC1A7    | AAAT       | solute carrier family 1, member 7 (glutamate transporter) | 55.4      | 1     | rs1769309  | 53363459      | T      |        |
| 37 | 1p32.3   | SLC1A7    | AAAT       | solute carrier family 1, member 7 (glutamate transporter) | 55.4      | 1     | rs3737989  | 53372666      | T      |        |
| 38 | 1p32.3   | SLC1A7    | AAAT       | solute carrier family 1, member 7 (glutamate transporter) | 55.4      | 1     | rs1288367  | 53378472      | T      |        |
| 39 | 1p32.3   | SLC1A7    | AAAT       | solute carrier family 1, member 7 (glutamate transporter) | 55.4      | 1     | rs2486634  | 53383440      | T      |        |
| 40 | 1p32.3   | SLC1A7    | AAAT       | solute carrier family 1, member 7 (glutamate transporter) | 55.4      | 1     | rs1679933  | 53384287      | T      |        |
| 41 | 1p21.2   | GPR88     | STRG       | G protein-coupled receptor 88                             | 3.9       | 1     | rs2809823  | 100776350     | T      |        |
| 42 | 1q21.3   | SNAPAP    | SNAPIN     | SNAP-associated protein                                   | 3.2       | 1     | rs3795396  | 151902049     | T      |        |
| 43 | 1q22     | CHRNA2    |            | cholinergic receptor, nicotinic, beta 2                   | 12.2      | 1     | rs4845652  | 152804829     | T      |        |

Key appears on page 109.

Complete list of all 94 genes and 1,536 SNPs present on the COGS SNP Chip

|    | K      | L      | M                               | N       | O       | P       | Q       |
|----|--------|--------|---------------------------------|---------|---------|---------|---------|
| 1  | Prom** | TFBS** | Association (reference)         | MAF_CEU | MAF_YRI | MAF_JPT | MAF_HCB |
| 2  |        |        |                                 | 0.23    | 0.49    | 0.47    | 0.40    |
| 3  |        |        |                                 | 0.12    | 0.32    | 0.02    | 0.04    |
| 4  |        |        |                                 | 0.13    | 0.37    |         | 0.08    |
| 5  |        |        | haplotype (Shibata et al. 2006) | 0.03    | 0.00    | 0.11    | 0.03    |
| 6  |        |        |                                 | 0.20    | 0.26    | 0.22    | 0.11    |
| 7  |        |        |                                 | 0.22    | 0.45    | 0.00    | 0.02    |
| 8  |        |        |                                 | 0.03    | 0.47    | 0.10    | 0.09    |
| 9  |        |        |                                 | 0.04    | 0.20    | 0.02    | 0.01    |
| 10 |        |        |                                 | 0.05    | 0.43    | 0.11    | 0.15    |
| 11 |        |        |                                 | 0.07    | 0.30    | 0.09    | 0.10    |
| 12 |        |        |                                 | 0.10    | 0.33    | 0.13    | 0.11    |
| 13 |        |        |                                 | 0.03    | 0.21    | 0.00    | 0.00    |
| 14 |        |        |                                 | 0.40    | 0.00    | 0.19    | 0.26    |
| 15 |        |        |                                 | 0.35    | 0.28    | 0.13    | 0.19    |
| 16 |        |        |                                 | 0.01    | 0.00    | 0.03    | 0.07    |
| 17 |        |        |                                 | 0.07    | 0.15    | 0.03    | 0.07    |
| 18 |        |        |                                 | 0.24    | 0.00    | 0.38    | 0.43    |
| 19 |        |        |                                 | 0.33    | 0.48    | 0.06    | 0.12    |
| 20 |        |        |                                 | 0.12    | 0.39    | 0.00    | 0.03    |
| 21 |        |        |                                 | 0.25    | 0.05    | 0.08    | 0.06    |
| 22 |        |        |                                 | 0.30    | 0.00    | 0.03    | 0.09    |
| 23 |        |        |                                 | 0.01    | 0.26    | 0.01    | 0.00    |
| 24 |        |        |                                 | 0.02    | 0.00    | 0.00    | 0.00    |
| 25 |        |        |                                 | 0.12    | 0.41    | 0.31    | 0.30    |
| 26 |        |        |                                 | 0.03    | 0.19    | 0.01    | 0.00    |
| 27 |        |        |                                 | 0.02    | 0.13    | 0.01    | 0.00    |
| 28 |        |        |                                 | 0.14    | 0.04    | 0.27    | 0.17    |
| 29 |        |        |                                 | 0.08    | 0.05    | 0.22    | 0.06    |
| 30 |        |        |                                 | 0.07    | 0.31    | 0.19    | 0.22    |
| 31 |        |        |                                 | 0.10    | 0.23    | 0.36    | 0.29    |
| 32 |        |        |                                 | 0.29    | 0.23    | 0.34    | 0.26    |
| 33 |        |        |                                 | 0.42    | 0.13    | 0.32    | 0.22    |
| 34 |        |        |                                 | 0.06    | 0.41    | 0.44    | 0.30    |
| 35 |        |        |                                 | 0.43    | 0.48    | 0.42    | 0.30    |
| 36 |        |        |                                 | 0.42    | 0.11    | 0.16    | 0.08    |
| 37 |        |        |                                 | 0.17    | 0.23    | 0.26    | 0.31    |
| 38 |        |        |                                 | 0.17    | 0.35    | 0.32    | 0.23    |
| 39 |        |        |                                 | 0.38    |         | 0.33    | 0.40    |
| 40 |        |        |                                 | 0.40    | 0.31    | 0.40    | 0.33    |
| 41 |        |        |                                 | 0.48    | 0.12    | 0.23    | 0.24    |
| 42 |        |        |                                 | 0.47    | 0.30    | 0.31    | 0.36    |
| 43 |        |        |                                 | 0.09    | 0.19    | 0.13    | 0.10    |

Key appears on page 109.

|    | R                                                                                                                               |
|----|---------------------------------------------------------------------------------------------------------------------------------|
| 1  | Sequence                                                                                                                        |
| 2  | GGACATGAGTCACACAGACACAATGTGAGTGTGCTCCCCGTCATGCAACATCTGGACAC[A/C]ACTAACAGAGCATGGTGAATACATGCTGAATTGCATTGAGTATGGCTGTGAACTAGGCCT    |
| 3  | ACCACACCCAGCTCCCCAACTGAAGGTAAGAACAATTTAACCTGCTATAGCTCCATC[T/C]TTTGTTCCTCAGTCTCCAGATGCCCTGGTTGATCCTGCCTTGTACTCCAGAC              |
| 4  | CGATCAGACAGAGCAGTATTATACCCTCCATCCCCATCTCATCTAAATTTCCCTCT[C/G]TCTATATTTACTGCCTACTTGTCTGTTTCTCTTTCAAATCTTCTACTCACATCCGTA          |
| 5  | TATAAATACGCTGCCCTCAGAGCAGCTGAAAATGCCATTAATTTCCGGGAAGTGCCTTTGC[C/T]GACTGGCATAATTTAACAGCCAAAGCCAGAGCATTAAAATGGTGTGCTGCCTTAGTAA    |
| 6  | GAGATGTCTAAGGGTTTTCAATTTGGGATTTGTCAATGAAACTCCAGGGAACCTGTGACCC[A/C]TGACCTTTGTGGGTTGAACTGTGAGTGTATGCATGGGTGCTGGGGGCATTCCGCAGGGAGA |
| 7  | GAGCGGCTCCAAGGCCCTCAGTCTCAGCCACCCTGCCCTGTCCCCCTTCTCCTCCC[T/C]TGCCACAGGTACATGATGTCCTGGTGAGCGAACAGGCCAGAGCCCTGGAGGTGACTCT         |
| 8  | GTAAATATCCTATTAAGCATCTCTGCCTGGCTCAAGCCTCATTCCAAGGCCGGGGTGG[A/G]GGTCTGTTGAGTTGGTAAAATGGCAGGGCCGAAGCTTTGGCCCTCAGCCCTGCAGCCT       |
| 9  | AAGGGTGTGGTTATAAGGAGAGGTGAAGAATTGGGGTCATGGCTGCAATCTCCCCAAGG[A/G]GAATGGCTATTGAGAAGGCAGCCAGTGTGGCCACAGAGCTTTGTGCCTTATCTATTCT      |
| 10 | GTCAAATGCTGCTTCTGCATTGATTCAGATGATCGCATTTTTTTCTTTATTCTGTTACT[A/G]TGATGATTATATTGATCAGTTGTTTTGAACCATCCTTGCATTCCAGGAATAAATTTTTT     |
| 11 | CCAAGTGGACCAGGCCAGTGGGGACCAAGATAATTGGTAAATGTTCAAGGTTCTTAGCCA[T/C]GCTCCCCTACACCAGCACTGAGCACCCTTGCCTCCCCAAGGATGCAGGGACCCAGACAT    |
| 12 | CTGAAATCCAAAGGCAGGGACTCGAATATGGTGTCTCCAGACTTTATTTGCTGGGTCT[T/C]TGCCCCAGGAGATATTCAGTGAAGAAAAAAGTAGAAAATCCCTGAAATAAAGAAAGCT       |
| 13 | TTACAGCCAGTGGCACATCTTCTATTAAGAAGCTTCTGGCTAAAATAAGATTGCTATTA[T/C]TTTCCAACTGCCACTTGAATCTGTCCACTCTACCTCTAAATTAAGTTGATTTTCTTC       |
| 14 | CAAGATGGCACGGTTTTCCAAAGATGGAGTCTAGAAATCCCAAAGCATTGATGATAACC[A/G]AAGAAAATTCAGGTTCAATTTGAAAGTTATAGTTTGAAGATCTTAGGAAAGCAG          |
| 15 | TATGTGAGAGCCCTCCAGGTTGACTACATAAGGGTAGTTTCTCCAAGTGGCTTAATTCAT[T/C]GGATGTAGTGGTCCCTGTACTATTACGAATTGATGGGACACTTGATTGTTTATAAAT      |
| 16 | ACATCAGAACAGCAGCCTTCTCCTGCAGGGTGTGCAAGGGTGTGGAGGAAGAAACT[C/T]CTCAAACAAAGCAACAGAGAAAGACCCTGGACTTGGCTTTGCATACTACAAGCAAAGAA        |
| 17 | GTGGGGTGACACAGCAGAGGCACAGAGACTGTGGCCCAATTGGTACCCACATCCTGCTGC[A/G]CAACTTGTCTTTGGTAAAGGCAAGAGGCTACATGCGATTTATCTGTTTATTCTTAGA      |
| 18 | GGCCCCCTCCTCGGCAGCATGGCTTCTGTCCTACTTATGTCGAACTGGCAATGCTGGT[T/C]GCATGCAGATTAATGAGGCCACGGCTGAGGCCCTGCATTGGGGACTGGCCTGTTTCTA       |
| 19 | GCATTCCTGTTGGGAAGCTCTCACCCCTCACCAAGCTCACCTCTCTAGCACACCTTAC[A/G]TCTGAGCTCCAGGATCTTGCCTACTGACTAGCCTAAGACGCTTGGAAATGCTGGCCATG      |
| 20 | GGAACAGAGGCCAGATTCAGTGCCAGGTCCTCTGGTGTGTTGCCACTAGGCCCTCTGT[T/C]GTAAGTGAAGAACTGAGCTGGCAGAGCACTGGGGTCTGTGATGGTGGCAGACTCCCTGCC     |
| 21 | TTTATGCAGGCTCTACTCTCTACTCCAGTACTTATTCCATCATTAGGATTTTATTCT[C/T]GCACCTCCAGGGCCTAGCAACAGGCTTGGCACATGGTTAGTGCCAAACAATGTTGAATGA      |
| 22 | CTGCAGGAAATCCCAGGCCTCCCAGGCCCTGTGGATTCTCCTTCAGAAATCACAGCCTC[A/G]TTGGGATGCGGAGCACGTTGGCGGAGCCCATGCCAAAGATGGATCAGGAGCCTCCGCGTGT   |
| 23 | CATCCTGTACCAACAATACAGTGATAACCGTACCCCACTTTACTGAGCAATCACTTCAT[A/C]CCAGGCACCATGCTAAGCCCTCCCAGACATTATTCCTTTGAGGCTCATTAAAATCCTA      |
| 24 | CCAAAGGGAGCTCTTCCCAGGAACCTCACATTCCCAGTTGAAGTCCAAGATCCCTGAGG[A/G]CTGTAGCCCTGTTTCCAGTCAATTTGCTTTCCCTGGCATCTGCTGAGGGTTCAGCCAAGGT   |
| 25 | TTGGGCTCAGCCAGGTCCTTGTGGCACACTTCTCCTTCAGGAATGCCTTTTCTCAT[T/C]CTGTGAGGTCACCTCCTCCAGGAAGCCACCACTGAGCATTTCAGTGCACCAATTAGC          |
| 26 | TGCTTTAAAACCCAGGTAGGTATCACGACTGCCAATTTTCAAGCAAAATGACTGTGAAC[A/G]ACCTCCAAAGGCCACAGCTAATATGCGACAGAGCCAGGATTTGGGAGGAGTCTGTGTGAC    |
| 27 | CCCGGCACCCAGCAACAGCAGCACCAGACGGGCGCAACACACACAGATTCTGATACAG[T/C]GACTGCTGCCTAGCTCCTTAACCTCTAAACGGCAGTTTCTGAGTCTGAAAATATGGATAC     |
| 28 | GCTGGATTGAGAGCACAGGGTGGCTGCCCCACAAAGGTGTCTGTGCTGCAGTGCCACCC[A/G]TCAGGCCTTGGTGCCTCCTTTGCCACATTCCACCTGGCCTATCCAAGGCGCTTGGGGC      |
| 29 | ATAGAAGTGAGGATCCCATGGTAGGGGCCAGTGCCTGCTCCATGCATGCCAGGGCACAAA[T/C]AGAGCAGCAGAAGCCACGGAGAAGTGGGATGGTCCAAGTGCATGGCTCACACACAGCCC    |
| 30 | TGCTTGGGCTGGTGGTCTGCCCTGAGCTGGCCCTGACTCTTACATGTTCCACAGGA[T/C]GATGGACCGCCGACTCTTTTCTGCAGCACACGCCTGTGTGCTGTGAGCCCCCACTCTG         |
| 31 | GGGTGGGTAGGAATGCCACACCAGGGAGCTCTCGGGGTCAAGTCCCTCCTCACAGTCTG[A/C]AGCCCCATGGACCCCATCCTGGCCTCAGGAGAATCCCTGGGAAGTGTGCAAACACCTG      |
| 32 | CGCCTCGGTACTCTCACACGCACACTCAGTACACTCACACGCCCGCCTCGGTACTCTAC[A/G]CTCTTTGTCTTGGTACTCTACATGTCCACCTCAGTACTCACACGCCCTGCCTCGGT        |
| 33 | TTGTAAGTCTCCAGCTCCAGCACAATGTCTTACCAGAGCAGCAGCTGAATACAG[T/C]GGAGCTGAATGGAAGGAAGTACTGTGCTCCTCCAGGGCACCCCATCCATGCCTCTGC            |
| 34 | CAGATTGAACCTTCTGAATTGGATCATGCCGCTTCTGTATAAACTCATTCTGTGG[T/C]CTTTAGGATGCAACTTAGCTTTTGGCCTGGTTCAGGTTGACTTTGAGGCCGTCCCCAC          |
| 35 | TCTGGAGGCTGGAACCTCCTCCTAAGCCATCTGCCACCCTCAGAGCCAGGGATTGTG[T/G]ATCAAGAGATTGCAGTATTAGAGACATTAACCCGAGAGGCAGTGGGAAGGCCAGCCT         |
| 36 | GGCTGAGGAGGGCAAAACCATGGGAGGGGGGCCCAATGCAGGTCCTCCAGATGATT[C/G]TTCCCTATACTAATGTAATGTGAGGCAGAATTTCTAATTTTGTCCAAGGCGTCTGTGTT        |
| 37 | TCACCTGGAGACCACAGTGGCAGGATCATCATCTTACAGATCCTCATCAGGAGCTCTCC[A/G]GGGAAGTGAAGTAACTAATTTCTGAAAACACAGTAAGAAGTGGGGTTATAGCAAGAGA      |
| 38 | TCTGGGGCTACTTTGCCAAAGCTGCCTTTCCCATCTGTTTGGAAATGCAAAATGATTCC[A/G]GTCTGGATTAACCTGCCAGATAAATGAAAGGAAGGATGTAGAGGCTTAGAACAATATTT     |
| 39 | GATAGCCCCAGGTAGTTACTATGAAAGTCTTACAGTAGCGGCTGTGTGGGAGGAAGTCA[C/G]CAAGTGGAGAATAGAGAATCCCACCCCTCCTCTGGAGCAGAGAAGTCCCTGGGCCCTGGTG   |
| 40 | CAGCAGGGGTTGACTTATTTGCTAATGATTAATGATTAATGATTGCGCCAGGGCTACAGGC[A/G]GGGCCAACCCAGCCTGGGAAGGCCGGGGATAGGAAGGCTTCCAGAGGAGACGTGGTTTAG  |
| 41 | GCTGCAAGCCCAGGCGGGTGGGCAGGCAGGCAGCAGCAAGAATGCTTGGCTGCAAAA[T/G]CAGAAGCTGAGCTCAAGAGGAGAGCACCCCTGTGCTCAGAAGCAGGAGTGGTGGCTGATGT     |
| 42 | AATCTCAGGACCAAAGTCTTTCAGAATCCCCAAATTCCTGACCCGTAAGACCATATTC[A/G]CTTTGCTGCTGAGCAGCAGTATTCAAAAGAGTGGGGCAAAACAAGTTCAGTTTATCTG       |
| 43 | TCCCTTCTAGGTTCTTAGACACTATTAACCTCTTCTCCTGTGCTTCCATCCATAGCA[T/C]TTCCCTTATATGCTGTTAGAACAGCCATCACATTCTATAAATTTGCTGCCAAACTGT         |

Complete list of all 94 genes and 1,536 SNPs present on the COGS SNP Chip

| 1  | A        | B         | C          | D                                                  | E         | F     | G          | H             | I      | J      |
|----|----------|-----------|------------|----------------------------------------------------|-----------|-------|------------|---------------|--------|--------|
|    | Cytoband | Gene Name | Gene Alias | Description                                        | Size (kb) | Chrom | SNP ID     | Position (bp) | htSNP* | Coding |
| 44 | 1q22     | CHRN2     |            | cholinergic receptor, nicotinic, beta 2            | 12.2      | 1     | rs2072659  | 152815145     | T      |        |
| 45 | 1q22     | CHRN2     |            | cholinergic receptor, nicotinic, beta 2            | 12.2      | 1     | rs3811450  | 152817656     | T      |        |
| 46 | 1q23.3   | NOS1AP    | CAPON      | nitric oxide synthase 1 (neuronal) adaptor protein | 298.7     | 1     | rs6660701  | 160307530     | T      |        |
| 47 | 1q23.3   | NOS1AP    | CAPON      | nitric oxide synthase 1 (neuronal) adaptor protein | 298.7     | 1     | rs1337063  | 160325402     | T      |        |
| 48 | 1q23.3   | NOS1AP    | CAPON      | nitric oxide synthase 1 (neuronal) adaptor protein | 298.7     | 1     | rs1415259  | 160351933     | T      |        |
| 49 | 1q23.3   | NOS1AP    | CAPON      | nitric oxide synthase 1 (neuronal) adaptor protein | 298.7     | 1     | rs7538490  | 160357954     | T      |        |
| 50 | 1q23.3   | NOS1AP    | CAPON      | nitric oxide synthase 1 (neuronal) adaptor protein | 298.7     | 1     | rs10458392 | 160358734     | T      |        |
| 51 | 1q23.3   | NOS1AP    | CAPON      | nitric oxide synthase 1 (neuronal) adaptor protein | 298.7     | 1     | rs1572495  | 160365925     | T      |        |
| 52 | 1q23.3   | NOS1AP    | CAPON      | nitric oxide synthase 1 (neuronal) adaptor protein | 298.7     | 1     | rs10494368 | 160369894     | T      |        |
| 53 | 1q23.3   | NOS1AP    | CAPON      | nitric oxide synthase 1 (neuronal) adaptor protein | 298.7     | 1     | rs4656355  | 160390421     | T      |        |
| 54 | 1q23.3   | NOS1AP    | CAPON      | nitric oxide synthase 1 (neuronal) adaptor protein | 298.7     | 1     | rs951121   | 160393068     | T      |        |
| 55 | 1q23.3   | NOS1AP    | CAPON      | nitric oxide synthase 1 (neuronal) adaptor protein | 298.7     | 1     | rs1538018  | 160397105     | T      |        |
| 56 | 1q23.3   | NOS1AP    | CAPON      | nitric oxide synthase 1 (neuronal) adaptor protein | 298.7     | 1     | rs6427659  | 160408973     | T      |        |
| 57 | 1q23.3   | NOS1AP    | CAPON      | nitric oxide synthase 1 (neuronal) adaptor protein | 298.7     | 1     | rs7412698  | 160421843     | T      |        |
| 58 | 1q23.3   | NOS1AP    | CAPON      | nitric oxide synthase 1 (neuronal) adaptor protein | 298.7     | 1     | rs4657165  | 160427626     | T      |        |
| 59 | 1q23.3   | NOS1AP    | CAPON      | nitric oxide synthase 1 (neuronal) adaptor protein | 298.7     | 1     | rs1415263  | 160432667     | T      |        |
| 60 | 1q23.3   | NOS1AP    | CAPON      | nitric oxide synthase 1 (neuronal) adaptor protein | 298.7     | 1     | rs4098275  | 160435746     | T      |        |
| 61 | 1q23.3   | NOS1AP    | CAPON      | nitric oxide synthase 1 (neuronal) adaptor protein | 298.7     | 1     | rs4531275  | 160453174     | T      |        |
| 62 | 1q23.3   | NOS1AP    | CAPON      | nitric oxide synthase 1 (neuronal) adaptor protein | 298.7     | 1     | rs6683968  | 160458036     | T      |        |
| 63 | 1q23.3   | NOS1AP    | CAPON      | nitric oxide synthase 1 (neuronal) adaptor protein | 298.7     | 1     | rs7548168  | 160465166     | T      |        |
| 64 | 1q23.3   | NOS1AP    | CAPON      | nitric oxide synthase 1 (neuronal) adaptor protein | 298.7     | 1     | rs8179404  | 160467744     | T      |        |
| 65 | 1q23.3   | NOS1AP    | CAPON      | nitric oxide synthase 1 (neuronal) adaptor protein | 298.7     | 1     | rs4657178  | 160477234     | T      |        |
| 66 | 1q23.3   | NOS1AP    | CAPON      | nitric oxide synthase 1 (neuronal) adaptor protein | 298.7     | 1     | rs4145621  | 160485312     | T      |        |
| 67 | 1q23.3   | NOS1AP    | CAPON      | nitric oxide synthase 1 (neuronal) adaptor protein | 298.7     | 1     | rs4584372  | 160502061     | T      |        |
| 68 | 1q23.3   | NOS1AP    | CAPON      | nitric oxide synthase 1 (neuronal) adaptor protein | 298.7     | 1     | rs7528328  | 160514403     | T      |        |
| 69 | 1q23.3   | NOS1AP    | CAPON      | nitric oxide synthase 1 (neuronal) adaptor protein | 298.7     | 1     | rs6677154  | 160521288     | T      |        |
| 70 | 1q23.3   | NOS1AP    | CAPON      | nitric oxide synthase 1 (neuronal) adaptor protein | 298.7     | 1     | rs2819318  | 160547349     | T      |        |
| 71 | 1q23.3   | NOS1AP    | CAPON      | nitric oxide synthase 1 (neuronal) adaptor protein | 298.7     | 1     | rs2819328  | 160550681     | T      |        |
| 72 | 1q23.3   | NOS1AP    | CAPON      | nitric oxide synthase 1 (neuronal) adaptor protein | 298.7     | 1     | rs365522   | 160559210     | T      |        |
| 73 | 1q23.3   | NOS1AP    | CAPON      | nitric oxide synthase 1 (neuronal) adaptor protein | 298.7     | 1     | rs347300   | 160566447     | T      |        |
| 74 | 1q23.3   | NOS1AP    | CAPON      | nitric oxide synthase 1 (neuronal) adaptor protein | 298.7     | 1     | rs347311   | 160570531     | T      |        |
| 75 | 1q23.3   | NOS1AP    | CAPON      | nitric oxide synthase 1 (neuronal) adaptor protein | 298.7     | 1     | rs347313   | 160570900     | T      |        |
| 76 | 1q23.3   | NOS1AP    | CAPON      | nitric oxide synthase 1 (neuronal) adaptor protein | 298.7     | 1     | rs1396225  | 160575345     | T      |        |
| 77 | 1q23.3   | NOS1AP    | CAPON      | nitric oxide synthase 1 (neuronal) adaptor protein | 298.7     | 1     | rs10800465 | 160576937     | T      |        |
| 78 | 1q23.3   | NOS1AP    | CAPON      | nitric oxide synthase 1 (neuronal) adaptor protein | 298.7     | 1     | rs3751286  | 160580009     | T      |        |
| 79 | 1q23.3   | NOS1AP    | CAPON      | nitric oxide synthase 1 (neuronal) adaptor protein | 298.7     | 1     | rs347273   | 160584137     | T      |        |
| 80 | 1q23.3   | NOS1AP    | CAPON      | nitric oxide synthase 1 (neuronal) adaptor protein | 298.7     | 1     | rs386231   | 160592447     | T      |        |
| 81 | 1q23.3   | NOS1AP    | CAPON      | nitric oxide synthase 1 (neuronal) adaptor protein | 298.7     | 1     | rs6681981  | 160598245     | T      |        |
| 82 | 1q23.3   | NOS1AP    | CAPON      | nitric oxide synthase 1 (neuronal) adaptor protein | 298.7     | 1     | rs1810354  | 160602346     | T      |        |
| 83 | 1q23.3   | NOS1AP    | CAPON      | nitric oxide synthase 1 (neuronal) adaptor protein | 298.7     | 1     | rs164149   | 160605205     | T      |        |
| 84 | 1q23.3   | NOS1AP    | CAPON      | nitric oxide synthase 1 (neuronal) adaptor protein | 298.7     | 1     | rs737641   | 160605477     | T      |        |
| 85 | 1q23.3   | RGS4      |            | regulator of G-protein signaling 4                 | 7.3       | 1     | rs2661319  | 161306401     |        |        |

Key appears on page 109.

Complete list of all 94 genes and 1,536 SNPs present on the COGS SNP Chip

|    | K      | L      | M                                                                                                                          | N       | O       | P       | Q       |
|----|--------|--------|----------------------------------------------------------------------------------------------------------------------------|---------|---------|---------|---------|
| 1  | Prom** | TFBS** | Association (reference)                                                                                                    | MAF_CEU | MAF_YRI | MAF_JPT | MAF_HCB |
| 44 |        |        |                                                                                                                            | 0.06    | 0.04    | 0.21    | 0.21    |
| 45 |        |        |                                                                                                                            | 0.08    | 0.13    | 0.11    | 0.22    |
| 46 |        |        |                                                                                                                            | 0.38    | 0.46    | 0.33    | 0.41    |
| 47 |        |        |                                                                                                                            | 0.05    | 0.37    | 0.13    | 0.14    |
| 48 |        |        |                                                                                                                            | 0.37    | 0.34    | 0.31    | 0.39    |
| 49 |        |        |                                                                                                                            | 0.30    | 0.31    | 0.44    | 0.49    |
| 50 |        |        |                                                                                                                            | 0.22    | 0.05    | 0.48    | 0.43    |
| 51 |        |        |                                                                                                                            | 0.08    | 0.35    | 0.14    | 0.14    |
| 52 |        |        |                                                                                                                            | 0.11    | 0.35    | 0.14    | 0.14    |
| 53 |        |        |                                                                                                                            | 0.38    | 0.04    | 0.26    | 0.23    |
| 54 |        |        |                                                                                                                            | 0.18    | 0.41    | 0.17    | 0.18    |
| 55 |        |        |                                                                                                                            | 0.25    | 0.09    |         | 0.19    |
| 56 |        |        |                                                                                                                            | 0.07    | 0.43    | 0.00    | 0.00    |
| 57 |        |        |                                                                                                                            | 0.33    | 0.22    | 0.28    | 0.33    |
| 58 |        |        |                                                                                                                            | 0.06    | 0.00    | 0.02    | 0.03    |
| 59 |        |        |                                                                                                                            | 0.38    | 0.49    | 0.46    | 0.44    |
| 60 |        |        |                                                                                                                            | 0.16    | 0.25    | 0.13    | 0.12    |
| 61 |        |        |                                                                                                                            | 0.27    | 0.48    | 0.48    | 0.41    |
| 62 |        |        |                                                                                                                            | 0.29    | 0.48    | 0.48    | 0.40    |
| 63 |        |        |                                                                                                                            | 0.05    | 0.12    | 0.00    | 0.00    |
| 64 |        |        |                                                                                                                            | 0.21    | 0.40    | 0.15    | 0.16    |
| 65 |        |        |                                                                                                                            | 0.23    | 0.39    | 0.49    | 0.48    |
| 66 |        |        |                                                                                                                            | 0.45    | 0.05    | 0.31    | 0.27    |
| 67 |        |        |                                                                                                                            | 0.20    | 0.36    | 0.48    | 0.43    |
| 68 |        |        |                                                                                                                            | 0.13    | 0.33    | 0.39    | 0.36    |
| 69 |        |        |                                                                                                                            | 0.14    | 0.35    | 0.47    | 0.48    |
| 70 |        |        |                                                                                                                            | 0.45    | 0.43    | 0.44    | 0.47    |
| 71 |        |        |                                                                                                                            | 0.07    | 0.39    | 0.07    | 0.12    |
| 72 |        |        |                                                                                                                            | 0.30    | 0.20    | 0.31    | 0.36    |
| 73 |        |        |                                                                                                                            | 0.38    | 0.14    | 0.30    | 0.34    |
| 74 |        |        |                                                                                                                            | 0.28    | 0.01    | 0.06    | 0.19    |
| 75 |        |        |                                                                                                                            | 0.43    | 0.18    | 0.14    | 0.24    |
| 76 |        |        |                                                                                                                            | 0.38    | 0.02    | 0.07    | 0.20    |
| 77 |        |        |                                                                                                                            | 0.31    | 0.20    | 0.43    | 0.46    |
| 78 |        |        |                                                                                                                            | 0.04    | 0.01    | 0.07    | 0.16    |
| 79 |        |        |                                                                                                                            | 0.10    | 0.34    | 0.07    | 0.16    |
| 80 |        |        |                                                                                                                            | 0.31    | 0.43    | 0.25    | 0.24    |
| 81 |        |        |                                                                                                                            | 0.42    | 0.08    | 0.41    | 0.47    |
| 82 |        |        |                                                                                                                            | 0.11    | 0.49    | 0.02    | 0.17    |
| 83 |        |        |                                                                                                                            | 0.44    | 0.44    | 0.35    | 0.29    |
| 84 |        |        |                                                                                                                            | 0.01    | 0.11    |         | 0.44    |
| 85 |        |        | p=0.005 (Chowdari et al. 2002), p=0.007 (Chen et al. 2004), p=0.03 (Talkowski et al. 2006), haplotype (Morris et al. 2004) |         |         | 0.32    | 0.50    |

Key appears on page 109.

|    | R                                                                                                                                |
|----|----------------------------------------------------------------------------------------------------------------------------------|
| 1  | Sequence                                                                                                                         |
| 44 | AGTGTGGGTGGAGGATGGACGAGTGAGCTACCAGGAAGAGGGGCGCTGCCCCACAGAT[C/G]CATCCTTTTGCTTCATCTGGAGTCCCTCCTCCCCACGCCTCCATCCACACACAGCAGCT       |
| 45 | GAAAAGGGTCAGTGTATATGAAAGGGTTACCTGGGCAGTGTCACTCCCTCCATCTGTA[T/C]GCAGCCCTTTGGGAACCATCACAATAAGGAAGAGGTGAGGGCAGAGGTGAAGGATCCACT      |
| 46 | CCTCCCTGAGTGAGGAGTTCTGGCTTCTGAACTGCAGTGGCGGTTCCCATGCCATCA[C/G]CAGGAAAGAGTGCTTTTTCTGTGGAACAGTGTCTGCTCTTCTCAAGCCACTTGACCT          |
| 47 | accaggtcttcctggagaaatgattgattccaggtctgagacacaaaatacacaagGAGT[A/G]GAAGAGAGATGAAGGGGAAGGAGAATGGCGAGAGGGAGAAAAATCCCTGATACCAAAAG     |
| 48 | CAATGATACCTGCTGGTCTGCAAGCCACATTTGAGAGGCCAAAGCTCACCATCCCA[A/G]ATTACATTTCTAGACAATTCCTCTTCCAAGAATCCCTCACAAAAACCTACAACAACCTCC        |
| 49 | ATGTCTCCAAATGTACAGCTGGTAGTGACAGATATGGCATCTCCATTTCCAGAGGAAGA[T/C]GGTGGAGGACACTAGTTTTGCCCTTACAGCTGTGTGACTTTGGGCATATCATCTCCTGA      |
| 50 | CCCCAGTGCCAAAAAGTGAATAAACTCTTTGGTGGGCATGTAACAAAATAACTTCAATT[T/G]TTATTTACACACAGGATGACTAAATCTGAAATTGAATTATAGGGAAGAGTAGACAACCCTC    |
| 51 | GATTTGCTAATGAAACAGAGATCAGGGACAGCTTTCAGAGGATGCAGATTTGAGCTGAGCC[T/C]ATTAGGACAAAATAGATCTATAGAAGCAAAGGATATTTAGGCAGGGAAAAACGTGAGAGGTA |
| 52 | CCATTTATAGTTTTATCTAAAAGTCTATGAATGAAATCATACTCTCTTGCTGTCTTATTA[T/C]TCTAAAAGTGTGATATTTATGTGAACTAGATTTTATAACAAGCTTTCCCTTTTATAATC     |
| 53 | ATTAGTTAAAAAAGGTATATATTCTTTTTTTTTTTTTTTTGGAGAGCACTAATATTTGCCA[A/G]TCACTTTTGTGTAGGACATTTTATTCTGTTTGATCTTTACTGAGAGCCAATTTACAGTT    |
| 54 | AAAAAAGTCCCTTTTTAATTCACCTTTGACGAAGAGATAGGGAATATGTTGTCAGTAAT[A/G]TCACTATCATTATGAAAGTGATATCTCTGTTAATAGTAGCTACTATTAGGAATAGCTACT     |
| 55 | CTTTATCCCTTTTTATAACTTTCTCCCTAAGTGGCCCCCTCAGCACCATTACTCCTTT[C/G]TCATTGTTCTCCTTTTCATCCTAAGTTCAGAGTTGGCAAGCCTACCTCAGAACAGCTGAA      |
| 56 | ATGGCCATGACTCTGTGTTGCCAAATTAACATTGCAAACTAGTGGCCTACAGGAAT[A/G]ATCTTGATGAGGCGGGTGGTTAAGTGAATGTCAGCAGGTGGTCATTGGAGATTATTGT          |
| 57 | TGTGAGCTCATGTTTCATTCTGTGGTAACATAATTCCGCCCTACTTCTAGAAATCAGTGG[T/C]CATAACAGATTACGTTTGCCTTTTGGTCAATAATCTGATGCCTGAAGAACTCAAGTCTTG    |
| 58 | TGTAAAGCAGCTCTTCTGTTGGCCTCACTTTGATTTTTCTAGTGTGCCCATACCACGG[A/G]CACTGTCCACACAGGAACATCAGATTGAAAAATATCCCTGAGTTCCTAAGAGACAGGCA       |
| 59 | AATGTGGTAAAAATGAAATCTGTCAACTGCTTCTGGGTGGAAGGCAACATACTTGATGA[T/C]GATAAAGGAATTGGGAATGCCTAATGGTGACATTGGGGCTCACCATTTAGTGGGTTTTAT     |
| 60 | AGTGGGAAAAGAGGACAGCACCATTATGGAATATCTGCTCCGCTGCTGCATGCCGGT[A/G]CGTCCCTCACTGTTGTTTTATTTATTCCTTTAAACCCCTGTAAGGCTCCATAGATGAAGTG      |
| 61 | ATTTGAAAAGAGAAGTATAAACATTGTGATAAGAATGTTATAAGAACACTGACTGTGGAA[T/C]CAGGCAGCCTGGGTTCAAATCTTGGCATGACTATTACTGGCTGTGTGACCTTGGTCAACT    |
| 62 | acacacacacacGGGTTAAGACCATGGTGTCTGGGTTCAAAGCCTGTCTCTATAACTCAC[T/G]AGCTTTTTTACTTAAGGCAGATTACTAACTTCTCTAAGCTTCACTTTCCCTAATTTTCA     |
| 63 | TTTTCTCTACCCCGGCTGCCTGCCAAAAGCAAACAAGTACTCTCTGGAGGAAGATAACAT[T/C]GTTCCAGACCCTCAAATTAACGCTATCATTTTTCAAATACAATGTCTGGCAGTCAATAAAA   |
| 64 | CATTTGGGTGTCTTCTTTGAAGAAATGTCTACTCAAGTCTTCTGCCCATTTTAAAATGG[T/C]TTATTTGGCTTTTGTGTTGTTGAGCTGACTTCTTATATAGTCTGGACATTAACCCTTTA      |
| 65 | CAAATATTTACTGAGCACCTATTTGGTGTCTGGGTGATATACTAAGTATTGGGGATTTCAC[T/C]TGAGCAATTATGGCCCTGCCCTGCAGAGTTCACAGTCTGATGGCGGGATACAGACGTG     |
| 66 | TCGGGACCCATCTCAATATGTTTTTTCATCTTGACTTAAATCAAACCTCTTCTGTTT[C/G]TTCTCCATCAAACCACAGCACCCCCCTTCCCTTTTATCAAGGGGTGATGGACAATAGA         |
| 67 | CTTTATGAGAATACGCAGTTCAATTTATGTGGATTTGTGGGGTCTTTGCCATGTATA[T/C]CTCAAAAATCTGAGTTAAGTAACATTAAGCACCCTTTACAGATGAGAAAACTGGGGCAGT       |
| 68 | TCTCTTCTCCTGATTCTCAGTCTGTTTGGCAAGATTATGTTCCAGGATTTGCACCCTA[T/C]TTTTCACTCTTTTTAAAACCCTTAAGCACCCTCCTACTTTCTATGCAAACTATAGTAAC       |
| 69 | GGGTAAGAAATCATGATTAATAAAGGCCACAGAGAGAGTGAACCAACAGGGAGGTGGAC[A/G]AAGCAAGAAAGAGAGATATGGTCAACTACAACATTCTCCAGAAATATAAGACATTTAAG      |
| 70 | CTCTCTGTTGCTGACTCTCTCTCTCTCTCTGACCCTCTTCCGTTGTTTCTTCCAGCA[T/C]CTTGAGCTGTGAACATGCTCTGTCTCTCTGCTTCCCTGGATACCCTCTTCTCCCTACA         |
| 71 | TCATGAGAGAGCCCATAGACCTGCACAGCAGGAAAAGTGAATAAGTACCAAAAGCAATCA[A/G]AATTAACCTCTGGATCCGCTCTCTGGGCCTGGCCCTAGAGGGCATCTTTTACACTAAT      |
| 72 | TAGAGACATCTATGAAGACATCCAGGACTTGGAAACATAAGAGGAATAAAAAATCCAGG[C/G]TTTCCAGGTGGCATAAATGTAACATGGGACTAATTTCTAGCCCAGGTATAGAGAAAACAA     |
| 73 | ATCAGATTTTCTGAAAAGATGCTTTATCTGTTAAGGTTAAGTTAACCTTGGCTTACTGCC[A/G]TTCTCTGTTCCCTCCACATCTCTGTGTCTTGTGGGCATGCCAGTTTGCATTCAAATCTG     |
| 74 | TATGCATCTTTTGTCTTCCAGGCCTCTTTAGCAGATGTTAGGTACCTTGTCAAGTACCTT[C/G]TCAATAACACATGCCAGGGTCCAGATTTACTGATAGGTGTCTATTCCCTACCCTAGCTC     |
| 75 | GGAAGAGGGAGAAAAAGAAAGCCATAGGCGCTGGAGATGAGAAAGTTAGAGTTGGGA[A/G]AGTGAAGGCTCGTATGTGGCCTTGTGTAGGGGACCTGGGGAGGAGAGAAAAAGGAAATAC       |
| 76 | CAGAACCAAAGTTAAGTCCAAATGCAATGAACAGCTGTTCTCCTCAGCACACCTAATGTG[A/G]GTATCAACTTCATACCTAGCAGGAGTCAACATTTGATGAACTGCGGCAATGGTCATGAAA    |
| 77 | ACTATGATAAAAAATTGTTCCACCTTCTCCTGCACTGCTTTTTCTTTCTGTCTTAATTGCC[T/C]CTTGGTGCAGTGAATCCATAGTCAGGATAAAACATTTCTTGAGCATTTACTATATGCCA    |
| 78 | ACCACAGTGTGAAACAATCAGTCAACTGAAAGGACAGATAGCAAATATGCCAGTTATGG[A/T]CTTAGCCCCAATCTTCCCTCCCATGTGTAACAGAAGTAGTCAATATGCTTCAGAATCTT      |
| 79 | ATGGGAGGAGTGAGGGAAGTAGTACTGAAAGAAAAGTATAGGAAGTGATCCTTATGGAAT[T/C]CCCCTGAGTCCCCAGGGAATCGTGAATCACATCAAACCCACTCCACCCAGCAGACCCT      |
| 80 | AAACCTCCATGTGAGATAAGATATGAATGTTAAAGAGAGAGAGGTGCCCTGATATAAACC[A/G]CCTGGGAATCTAAGGGTAGAGCTATTGGTCAAGTAATTTGCTTCTGGGTTTAAAACATTT    |
| 81 | TCTTCTAGGTATTGCTGGTACTCCACCATTGAACTTGGGTACCTGCAAAAAAGCTTTCA[A/G]TTTTTTTCTGGCTTCTGTAAGAGGGGACTTTTCTTCCCTCAATTCTAATTCTGACT         |
| 82 | GCAGCCATTTCTTCTCAGAGAGCTTTTGAATCAACAAACAGTATACTTGGCACCTAT[A/T]GGGTGCATGGTCTCTGTGAGCTCTGTGGGAGACAGCAGATTGTTTCTTAGTTTACTACT        |
| 83 | ATAACACTGCAGTTTGCATCTGTACCTTGTGTCTAGGATAAAGACTTAATCCCCGAAC[A/G]TATGACTCTAGCAGGTCTCAGCAATCTTTCAGGCATTTGAAAATCTGTTAACAGCCACT       |
| 84 | CACACATGTATATAAACACATGTGTacacacacacacaaaacacacacacacacacCA[T/C]CTGATCCTATTTCCACTGACACCCTGATGCACCAAGGAAGGCTAACATAAACTGAATTT       |
| 85 | TGTAACATTTGCTTATAAGAACATAGAGAGTGAAGTTACTGCACCACCACAGGAAAGC[A/G]TAGTGCTTTCTGATGATGGAGCCAAACCTCATTCTGGGGTACCTTTCTGAAACAAGTT        |

Complete list of all 94 genes and 1,536 SNPs present on the COGS SNP Chip

|     | A        | B         | C          | D                                                      | E         | F     | G          | H             | I      | J         |
|-----|----------|-----------|------------|--------------------------------------------------------|-----------|-------|------------|---------------|--------|-----------|
| 1   | Cytoband | Gene Name | Gene Alias | Description                                            | Size (kb) | Chrom | SNP ID     | Position (bp) | htSNP* | Coding    |
| 86  | 1q23.3   | RGS4      |            | regulator of G-protein signaling 4                     | 7.3       | 1     | rs2842030  | 161307119     | T      |           |
| 87  | 1q23.3   | RGS4      |            | regulator of G-protein signaling 4                     | 7.3       | 1     | rs2940251  | 161314142     | T      |           |
| 88  | 1q31.3   | ASPM      |            | sp (abnormal spindle) homolog, microcephaly associated | 62.6      | 1     | rs10801589 | 195342817     | T      |           |
| 89  | 1q31.3   | ASPM      |            | sp (abnormal spindle) homolog, microcephaly associated | 62.6      | 1     | rs7551108  | 195365691     | T      | Thr119Ser |
| 90  | 1q31.3   | ASPM      |            | sp (abnormal spindle) homolog, microcephaly associated | 62.6      | 1     | rs877897   | 195370598     | T      |           |
| 91  | 1q31.3   | ASPM      |            | sp (abnormal spindle) homolog, microcephaly associated | 62.6      | 1     | rs4326657  | 195385567     | T      |           |
| 92  | 1q42.2   | DISC1     |            | disrupted in schizophrenia 1                           | 414.5     | 1     | rs2082552  | 229834513     | T      |           |
| 93  | 1q42.2   | DISC1     |            | disrupted in schizophrenia 1                           | 414.5     | 1     | rs12084975 | 229846734     | T      |           |
| 94  | 1q42.2   | DISC1     |            | disrupted in schizophrenia 1                           | 414.5     | 1     | rs1361519  | 229865965     | T      |           |
| 95  | 1q42.2   | DISC1     |            | disrupted in schizophrenia 1                           | 414.5     | 1     | rs4366301  | 229872909     | T      |           |
| 96  | 1q42.2   | DISC1     |            | disrupted in schizophrenia 1                           | 414.5     | 1     | rs6541281  | 229879757     | T      |           |
| 97  | 1q42.2   | DISC1     |            | disrupted in schizophrenia 1                           | 414.5     | 1     | rs1417584  | 229885673     | T      |           |
| 98  | 1q42.2   | DISC1     |            | disrupted in schizophrenia 1                           | 414.5     | 1     | rs3738401  | 229896918     | T      | Arg264Gln |
| 99  | 1q42.2   | DISC1     |            | disrupted in schizophrenia 1                           | 414.5     | 1     | rs11122321 | 229902233     | T      |           |
| 100 | 1q42.2   | DISC1     |            | disrupted in schizophrenia 1                           | 414.5     | 1     | rs4658935  | 229911421     | T      |           |
| 101 | 1q42.2   | DISC1     |            | disrupted in schizophrenia 1                           | 414.5     | 1     | rs1934909  | 229917902     | T      |           |
| 102 | 1q42.2   | DISC1     |            | disrupted in schizophrenia 1                           | 414.5     | 1     | rs10495307 | 229946017     | T      |           |
| 103 | 1q42.2   | DISC1     |            | disrupted in schizophrenia 1                           | 414.5     | 1     | rs10495308 | 229946190     | T      |           |
| 104 | 1q42.2   | DISC1     |            | disrupted in schizophrenia 1                           | 414.5     | 1     | rs2793092  | 229946963     | T      |           |
| 105 | 1q42.2   | DISC1     |            | disrupted in schizophrenia 1                           | 414.5     | 1     | rs884158   | 229951395     | T      |           |
| 106 | 1q42.2   | DISC1     |            | disrupted in schizophrenia 1                           | 414.5     | 1     | rs2793091  | 229961231     | T      |           |
| 107 | 1q42.2   | DISC1     |            | disrupted in schizophrenia 1                           | 414.5     | 1     | rs2793085  | 229966500     | T      |           |
| 108 | 1q42.2   | DISC1     |            | disrupted in schizophrenia 1                           | 414.5     | 1     | rs3738402  | 229969633     | T      |           |
| 109 | 1q42.2   | DISC1     |            | disrupted in schizophrenia 1                           | 414.5     | 1     | rs2492367  | 229973212     | T      |           |
| 110 | 1q42.2   | DISC1     |            | disrupted in schizophrenia 1                           | 414.5     | 1     | rs2812389  | 229977634     | T      |           |
| 111 | 1q42.2   | DISC1     |            | disrupted in schizophrenia 1                           | 414.5     | 1     | rs10495310 | 229985399     | T      |           |
| 112 | 1q42.2   | DISC1     |            | disrupted in schizophrenia 1                           | 414.5     | 1     | rs4658945  | 229985464     | T      |           |
| 113 | 1q42.2   | DISC1     |            | disrupted in schizophrenia 1                           | 414.5     | 1     | rs11590192 | 229989468     | T      |           |
| 114 | 1q42.2   | DISC1     |            | disrupted in schizophrenia 1                           | 414.5     | 1     | rs1322783  | 229995698     | T      |           |
| 115 | 1q42.2   | DISC1     |            | disrupted in schizophrenia 1                           | 414.5     | 1     | rs2255340  | 230002773     | T      |           |
| 116 | 1q42.2   | DISC1     |            | disrupted in schizophrenia 1                           | 414.5     | 1     | rs967244   | 230015269     | T      |           |
| 117 | 1q42.2   | DISC1     |            | disrupted in schizophrenia 1                           | 414.5     | 1     | rs1000731  | 230030114     | T      |           |
| 118 | 1q42.2   | DISC1     |            | disrupted in schizophrenia 1                           | 414.5     | 1     | rs6667141  | 230031254     | T      |           |
| 119 | 1q42.2   | DISC1     |            | disrupted in schizophrenia 1                           | 414.5     | 1     | rs7551537  | 230038840     | T      |           |
| 120 | 1q42.2   | DISC1     |            | disrupted in schizophrenia 1                           | 414.5     | 1     | rs12731570 | 230048561     | T      |           |
| 121 | 1q42.2   | DISC1     |            | disrupted in schizophrenia 1                           | 414.5     | 1     | rs12090070 | 230051472     | T      |           |
| 122 | 1q42.2   | DISC1     |            | disrupted in schizophrenia 1                           | 414.5     | 1     | rs748583   | 230059461     | T      |           |
| 123 | 1q42.2   | DISC1     |            | disrupted in schizophrenia 1                           | 414.5     | 1     | rs3081     | 230068955     | T      |           |
| 124 | 1q42.2   | DISC1     |            | disrupted in schizophrenia 1                           | 414.5     | 1     | rs1015101  | 230074317     | T      |           |
| 125 | 1q42.2   | DISC1     |            | disrupted in schizophrenia 1                           | 414.5     | 1     | rs7534369  | 230082857     | T      |           |
| 126 | 1q42.2   | DISC1     |            | disrupted in schizophrenia 1                           | 414.5     | 1     | rs11122362 | 230086482     | T      |           |
| 127 | 1q42.2   | DISC1     |            | disrupted in schizophrenia 1                           | 414.5     | 1     | rs1407599  | 230094534     | T      |           |

Key appears on page 109.

Complete list of all 94 genes and 1,536 SNPs present on the COGS SNP Chip

|     | K      | L      | M                                                            | N       | O       | P       | Q       |
|-----|--------|--------|--------------------------------------------------------------|---------|---------|---------|---------|
| 1   | Prom** | TFBS** | Association (reference)                                      | MAF_CEU | MAF_YRI | MAF_JPT | MAF_HCB |
| 86  |        |        | p<0.05 (Fallin et al. 2005)                                  | 0.49    | 0.29    | 0.46    | 0.40    |
| 87  |        |        |                                                              | 0.28    | 0.20    | 0.40    | 0.49    |
| 88  |        |        |                                                              | 0.50    | 0.16    | 0.24    | 0.19    |
| 89  |        |        |                                                              | 0.01    | 0.00    | 0.00    | 0.00    |
| 90  |        |        |                                                              | 0.08    | 0.31    | 0.00    | 0.00    |
| 91  |        |        |                                                              | 0.02    | 0.16    | 0.17    | 0.18    |
| 92  |        |        |                                                              | 0.14    | 0.02    | 0.47    | 0.42    |
| 93  |        |        |                                                              | 0.07    | 0.08    | 0.00    | 0.03    |
| 94  |        |        |                                                              | 0.01    | 0.02    | 0.00    | 0.00    |
| 95  |        |        |                                                              | 0.41    | 0.48    | 0.07    | 0.17    |
| 96  |        |        |                                                              | 0.48    | 0.23    | 0.07    | 0.12    |
| 97  |        |        |                                                              | 0.43    | 0.47    | 0.05    | 0.16    |
| 98  |        |        | p=0.0001 (Zhang et al. 2006), haplotype (Hennah et al. 2003) | 0.30    | 0.09    | 0.24    | 0.19    |
| 99  |        |        |                                                              | 0.28    | 0.23    | 0.47    | 0.32    |
| 100 |        |        |                                                              | 0.01    | 0.00    | 0.00    | 0.00    |
| 101 |        |        |                                                              | 0.19    | 0.06    | 0.00    | 0.02    |
| 102 |        |        |                                                              | 0.01    |         |         |         |
| 103 |        |        |                                                              | 0.21    | 0.20    | 0.46    | 0.42    |
| 104 |        |        | p=0.0013 (Liu et al. 2006)                                   | 0.19    | 0.23    | 0.46    | 0.40    |
| 105 |        |        |                                                              | 0.01    | 0.16    | 0.00    | 0.00    |
| 106 |        |        | p=0.0071 (Liu et al. 2006)                                   | 0.30    | 0.21    | 0.48    | 0.47    |
| 107 |        |        |                                                              | 0.13    | 0.36    | 0.31    | 0.28    |
| 108 |        |        |                                                              | 0.02    | 0.04    | 0.23    | 0.20    |
| 109 |        |        | haplotype (Chen et al. 2007)                                 | 0.08    | 0.25    | 0.09    | 0.16    |
| 110 |        |        |                                                              | 0.49    | 0.20    | 0.47    | 0.48    |
| 111 |        |        |                                                              | 0.08    | 0.25    |         | 0.21    |
| 112 |        |        |                                                              | 0.24    | 0.32    | 0.33    | 0.30    |
| 113 |        |        |                                                              | 0.41    | 0.34    | 0.41    | 0.41    |
| 114 |        |        |                                                              | 0.13    | 0.19    | 0.15    | 0.12    |
| 115 |        |        |                                                              | 0.19    | 0.29    | 0.39    | 0.41    |
| 116 |        |        |                                                              | 0.14    | 0.21    | 0.18    | 0.14    |
| 117 |        |        | haplotype (Hennah et al. 2003)                               | 0.25    | 0.19    | 0.47    | 0.49    |
| 118 |        |        |                                                              | 0.27    | 0.28    | 0.03    | 0.04    |
| 119 |        |        |                                                              | 0.33    | 0.37    | 0.41    | 0.40    |
| 120 |        |        |                                                              | 0.16    | 0.12    | 0.15    | 0.13    |
| 121 |        |        |                                                              | 0.10    | 0.09    | 0.00    | 0.00    |
| 122 |        |        |                                                              | 0.40    | 0.17    | 0.36    | 0.44    |
| 123 |        |        |                                                              | 0.06    | 0.00    | 0.06    | 0.07    |
| 124 |        |        |                                                              | 0.42    | 0.33    | 0.49    | 0.49    |
| 125 |        |        |                                                              |         |         |         |         |
| 126 |        |        |                                                              | 0.13    | 0.13    | 0.39    | 0.31    |
| 127 |        |        |                                                              | 0.35    | 0.25    | 0.09    | 0.18    |

Key appears on page 109.



|     | R                                                                                                                              |
|-----|--------------------------------------------------------------------------------------------------------------------------------|
| 1   | Sequence                                                                                                                       |
| 86  | TTCAAGCTTCACTTAACTTGCATATGAAATGAACCGTACAAAAATACAAGAGTGTGCTGTAATATTTTGCAAAACAGATAAAAAGATAACTAGAGCTCTGTC                         |
| 87  | TTCTCGAATAATGAGTGTTTTTCAAAGGTGGTCTTGTATACATTATCTTCAGAAAAA[C/G]GGTCAGCCAATATTTTTTTTATTTCTTTAATAGACAACCATAAAGAAGAAAGAAAGGAT      |
| 88  | AGAGTTTCTGCTTGTAGATATGGCGCAGTGCATGAAAGAATGCAGTAGAGCAGTGTAA[T/C]TCAATCTTCAGTTTTCTGGTCAGATGATGAAACAAGGCAGCCCTGAGGAAGTGGGGTA      |
| 89  | AATGTGGAGAGAATGAGGAGAGGCAGAGATACTTACCATTCTATACAGGTGAGGAACA[C/G]TGGGGTGTCTATACTCAGCTGCTATATCAGGATCCAAAGTAGGCGATTAGAATAACA       |
| 90  | ACTTCTTAACTAAGGTATTGAACAGTGGGGACAATATGCCAAAGTGGGCAGGCCACAC[A/G]GGACTGTGCTTACTGATGAGAGAGAATAGAGAACAAAAAGTATATTTTCACTACTTT       |
| 91  | CCTTTGGATCCACCCATTTCCAGAATATAAAATAGGAACACTTACTGACCACATTCTCAC[A/G]CTGGTTCTAGATCCAAGGAACAAGGGCAATTATTGGAGAAAAGGGCCAAGTGAAGCCCC   |
| 92  | AAACACCATAGAGTGTACTCACAAAACTAGATGGTATAGGCTATGACACACCTAAGCT[A/G]TATTGTATAGCTACTGTTCTAGGCTACAAACCTGTGCAGCATGTTACTGTACTGAATAC     |
| 93  | AATGGGTAAGAGTGTAGGCTGGCCTTTCACTTACCTTCTGTGCTTTGCTCTTTACTGCT[A/G]GGGCTAGCAGCCGAAAGCTACATATCCCAGGCTTCTCGCCAGCTCATTGCTGTTAAA      |
| 94  | TTGTTAATCTTAGCTCATAAAAAGGCTTCTAGTGGGGATGGAGCTTGAAGGAAAGCAT[C/G]AGATTTTCCAGGCAGGAGGGTGGAAAGTGATACAACCAAAGTGAGAATGTTTATTGCAAGTT  |
| 95  | GGTGTCCACCTCTAAAATTGGTTGAAATGAGGTATTGTATGGAAAAGGCTTTGGTAAAC[C/G]JAGGAAGTGTATACAAATGTCAAATATTAGTTTTTTCATTAGTTATATTGTTATTTTATG   |
| 96  | AACTGATGAACAGATTTTCTCCACAAGAAGGAAAAAGGGAGAAAAATTCGTAGCTCTT[T/C]TCTCTTTTAAAGACTGTGCTGGAAAATCCAAAATGTTATCGGAATAAAGGAATGACTT      |
| 97  | AACATCGAGGGATGGCCTCCGGTATTGGTGTCTTGTGACACTATCCAGGTGATTCTAGG[A/G]GGCAGTCAGGACTGGAAGGCTTTGTTTTAAGGAAAAGTCTATTTAACATCCTAGTACAC    |
| 98  | AGATGGGAGCCAAAGCTGCCAGCTTGGACGGCCTCAGGAGACCCGCGATGTCTCTC[A/G]GCCCTTCAGTCTCTTGGCTACAGGGTCTCTGCAGACTTGGCCAGGCCGCAAGGAACAG        |
| 99  | tgctctcttgacacagtcctcattactgtgtgacctcattctctacagtttccctt[A/C]catcaatctgcccagatccagtgccattctgtccctctgtctttcatttcaccttc          |
| 100 | CCTCTTACTTTAAGTAAAACTTAAAAATTGGGAGATGGGCTATACATTAAGACAAAAAT[A/C]CCATAGGAAGAGAATATGAACAAAATGTCATTTATTTAGTTTGGTTGCATTGTCTTAGCT   |
| 101 | TGTGATAACCTATTGATGGGTTGAACTTTTCTGAGCCAGCACATAAAGCTCCCGGAAA[A/G]JACAGCCACAGTCAGAGACAATCAAAGTTACTTTGGTCCCAGTAAAGATCAGACAAAAGT    |
| 102 | TTTGAACGCTTGGTGTGAGTAAAGGAATGGGTACATTTACAGCATTATCCTAGAAGGTCTT[A/T]TCAGGCCAGACTCTACTGCGTATTTAAGTGGGGTGTCTGAATTAGCTTCTGCAGTAACT  |
| 103 | CTTGACAGATGACCTTTTCTAGTATCCTTAGAATGAATTGTTGGTAAATGCTTAGTTTCT[C/G]GGCTATAGGTTTCAATGCATATGACAAGTTTATGTGAATGTCTTTCACTAACAGCCTCA   |
| 104 | GATTCTCTCACTGGCCCTTATGTGGCAAAGTTTGGTTGTCTCTCACCCATTACATATATT[T/C]CACCTTTGTTTCTTATGGAAAAAACTATGCTTTCTGGCACCAAAAAAAGTTGATT       |
| 105 | GGACTGTAGGTGTTTGTCTGTCAATAGGAGTTGATGAGGTCTTCTGTTTATCTTTTCC[A/G]TGCAATAAGAAGTCCCTCCTGACTCTAGGCAGATTCATCTGAGCAGGGGATACAGGGCT     |
| 106 | AAACACATACATGCACACACACAATTTCCGTTACAAATAGGACCAGTTTTACGTACATA[T/C]TGGTGAAGATCCAGTGGAAAAATGCACGGGGTGTATAGTTAGAGAAATGCAATGTATTCA   |
| 107 | ACATCTGTGGCTCTGACACTTGGAGGCATAAACTCAGCATCTAAAAAGGCCAAATTTAA[C/G]CTATCCCCTCCTCCGTGGCATCTCCACACAGCTAGATCTTGTCTGCCACCTTTGTACT     |
| 108 | CAGGACAGCTTGCACGTGTCCATCACGAGACGAGACTGGCTTCTCAGGAAAAGCAGCAG[T/C]TACAGGTGAGCAGGTGAAAGATCTTCAAGAAATATGATGGCATTTTTCTTTTCTTTGAGA   |
| 109 | TTTGCCATGAGCAGGGTAAATTTATAAAATCTTGTCTCCTCATTCTCTACAGAAAAGAAAT[T/C]GAAGCTCTCCAAGCAAGGATTTTGTGCTGGAAGCCAAAGATCAACAGCTGAGAAGGGAA  |
| 110 | TTACTCAACTTTTCAACATGCAATTGCAATATGCTTTGTTTCTGGACACAGCCAAAC[A/G]CTTGAAGAAAGAACTTCTTAATAGCATGTGACATTTCTGGATGTACTGGTGGAGACTT       |
| 111 | CAGTTCTGGTATTTTAAAAAAGTCAAGTTGTTCCCATGGGAGCAACTGGACATTACTT[A/C]TTAAATAATCAGAATAAAGGGAGGGTAGTAATTGAAATGGAATATGAAGTTGCCTTTGG     |
| 112 | ATAATCAGAATAAAGGGAGGGTAGTAATTGAAATGGAATATGAAGTTGCCTTTGGATCA[T/C]GTAACAGAATAAGCCTGGATGTAGTATCATTTTCCCTTAGATCAAATGTTGATTTAA      |
| 113 | TGCCTGGATCTAAAGCAAGTATTGGAAGTATTACTAAGAGAGGGTGTGGATTTAAGTATG[T/C]TCTAAGGCTCTTGGATAGGCCTCCCTAAGGGACAGGATCTGGAGAAACCAAGTAAATAG   |
| 114 | ATGAAGACATGGTTCTGCCCTCAACCACTTACTGCTGCTAGAAATGCCAGAAAATGTAA[T/C]AGATGCTAGAAGAGGAGTACTTACTTGAATATGATGACCTGCAAAAGGAAAGGTCAAG     |
| 115 | AATCATATGGCACACAGAGTACATTTAGTCTCTAAACTCTTCAAGAAACAGGAACTAGAA[A/G]TCCCAAATACGGTACTCACTTAAACACCTTGTGCTATATTATGTGCATATTAGTGAAGT   |
| 116 | CAAGGTCTTGGTCTAAGCCTCATGGGATTAGATCTGAGGTCAAATGCCTATAAAGTATT[A/G]ATCAAGGGCATTGTAGCATTTTCTCATGGCTTGGGTCTTGATATGAAT               |
| 117 | CAGTATCCAGCCCTCCCAAGTTACAGAAAAGCCTCAATGGAAAGTGGATTAGACACAGT[A/G]GCCATCCCAAGTCCAAAACATAACAGGACTAAGGGCCCAGGGCAGCAAACACTAGCTCC    |
| 118 | CTCGTAACTGTAGTTTGAACAAAATTTATCATTCCCAATCTACCAATGTGTGAAACTGAG[T/G]CTCAGTGAATTAACAGAGTGGCTCAAGTTTCTGTATATGGGAAGTAAAGAACTGGAATGA  |
| 119 | TGAAACTGTCATCAGGGGCATGAAAAATGGGTTTGAATAGTCCCTGCCCTTCTCTGCA[T/C]AAACGATATACAGCATTGATATTAAGGCAAATATCCTTTTCCATTGATGATGTGTAATC     |
| 120 | GTAGGGGTGGGAGTGAACATCCACACTCGAGTGGCTGCAGATGCCATGAGACCCCTCCAG[A/G]GATGACCAGGTCACTGTTAGGGCAGAGAGGAGGAGGAGGAGCTTTTCCAGGAGCTGGGCAT |
| 121 | ACTTTGTACCTGCTGAGCTTCTTGATATGTGTTACGTTTACTTATCACAAACCTCTGCA[A/G]GGTGGAAATTATTATCCTCATTTTTTTTTTTTTTTTTGGAGACAGAAATTTGCTCTTGTGCT |
| 122 | AGCTGCAGGTTTTTCCAGCAGGCTTGAACCCAAACCAGGGCCTTGAACATTTCCACACA[T/C]TGATAAAGGTATCTAAGCTTTTGGCCAAAACACTGAAAGAAACTGGCCCTGGCCCTGAGC   |
| 123 | TTGAGCGCTGGGGGCTGAAGTCAAGTCTCTGGGTTCAAATCACAGTGTGTGCTGCA[C/G]GCTGTCTCAGGCAAGTTGCTGACTTCTCTGTGTCAGG                             |
| 124 | GTGTCTCACCTGTGATAATTCAAAGGAGAGCCATGGACTGTGTGCGCTAGATTACCTT[C/A/G]GAGACTGGAGAGTCCCATCTCTGTACCACAGTGGACACCTGGACTTCTCTGGCTTTCTC   |
| 125 | ATTTTGTATTCTTAGTTTGAAGCAGTTATTCAAATTAAGTTTGAATATTTAAAAAA[A/T]TTTTGCTCTTGATTTTATTTCAGTTAAAGCTTCTTAGGCATGTGTTTATTGTAGGGCA        |
| 126 | TTTTGAGAGATAAGAATCATCTCCTTTGGGGTGGGGCAGCTGCATTCCACACTCGGGACC[T/C]GGCCACTCAGTGGGGGTGATGGTGCAGTTCCAGGGACTGATGTACTGCTCTGCAGTG     |
| 127 | ATATACTGCTTCTTCTTCTGACACCCACGCTCCACCTGTGGCATTAACTATCCAA[A/C]ATTATGTGGCCATTCCAGGTGTGTCAATAGTTTGTCAAGTATCAGCATTTTCTCTTGG         |

Complete list of all 94 genes and 1,536 SNPs present on the COGS SNP Chip

|     | A        | B         | C          | D                                              | E         | F     | G          | H             | I      | J         |
|-----|----------|-----------|------------|------------------------------------------------|-----------|-------|------------|---------------|--------|-----------|
| 1   | Cytoband | Gene Name | Gene Alias | Description                                    | Size (kb) | Chrom | SNP ID     | Position (bp) | htSNP* | Coding    |
| 128 | 1q42.2   | DISC1     |            | disrupted in schizophrenia 1                   | 414.5     | 1     | rs967433   | 230098438     | T      |           |
| 129 | 1q42.2   | DISC1     |            | disrupted in schizophrenia 1                   | 414.5     | 1     | rs11577215 | 230103529     | T      |           |
| 130 | 1q42.2   | DISC1     |            | disrupted in schizophrenia 1                   | 414.5     | 1     | rs10864702 | 230117276     | T      |           |
| 131 | 1q42.2   | DISC1     |            | disrupted in schizophrenia 1                   | 414.5     | 1     | rs2038636  | 230121872     | T      |           |
| 132 | 1q42.2   | DISC1     |            | disrupted in schizophrenia 1                   | 414.5     | 1     | rs2356710  | 230133586     | T      |           |
| 133 | 1q42.2   | DISC1     |            | disrupted in schizophrenia 1                   | 414.5     | 1     | rs821581   | 230143695     | T      |           |
| 134 | 1q42.2   | DISC1     |            | disrupted in schizophrenia 1                   | 414.5     | 1     | rs821585   | 230154072     | T      |           |
| 135 | 1q42.2   | DISC1     |            | disrupted in schizophrenia 1                   | 414.5     | 1     | rs2772122  | 230157116     | T      |           |
| 136 | 1q42.2   | DISC1     |            | disrupted in schizophrenia 1                   | 414.5     | 1     | rs821597   | 230168887     |        |           |
| 137 | 1q42.2   | DISC1     |            | disrupted in schizophrenia 1                   | 414.5     | 1     | rs12060283 | 230173702     | T      |           |
| 138 | 1q42.2   | DISC1     |            | disrupted in schizophrenia 1                   | 414.5     | 1     | rs4658971  | 230174437     | T      |           |
| 139 | 1q42.2   | DISC1     |            | disrupted in schizophrenia 1                   | 414.5     | 1     | rs821662   | 230187758     | T      |           |
| 140 | 1q42.2   | DISC1     |            | disrupted in schizophrenia 1                   | 414.5     | 1     | rs843979   | 230197231     | T      |           |
| 141 | 1q42.2   | DISC1     |            | disrupted in schizophrenia 1                   | 414.5     | 1     | rs821661   | 230201820     | T      |           |
| 142 | 1q42.2   | DISC1     |            | disrupted in schizophrenia 1                   | 414.5     | 1     | rs821616   | 230211221     | T      | Ser704Cys |
| 143 | 1q42.2   | DISC1     |            | disrupted in schizophrenia 1                   | 414.5     | 1     | rs821631   | 230214758     | T      |           |
| 144 | 1q42.2   | DISC1     |            | disrupted in schizophrenia 1                   | 414.5     | 1     | rs821639   | 230216466     | T      |           |
| 145 | 1q42.2   | DISC1     |            | disrupted in schizophrenia 1                   | 414.5     | 1     | rs3524     | 230225302     | T      |           |
| 146 | 1q42.2   | DISC1     |            | disrupted in schizophrenia 1                   | 414.5     | 1     | rs1160491  | 230228516     | T      |           |
| 147 | 1q42.2   | DISC1     |            | disrupted in schizophrenia 1                   | 414.5     | 1     | rs9726024  | 230235123     | T      |           |
| 148 | 1q42.2   | DISC1     |            | disrupted in schizophrenia 1                   | 414.5     | 1     | rs1411771  | 230241398     | T      |           |
| 149 | 1q42.2   | DISC1     |            | disrupted in schizophrenia 1                   | 414.5     | 1     | rs11122396 | 230241891     | T      |           |
| 150 | 1q42.2   | DISC1     |            | disrupted in schizophrenia 1                   | 414.5     | 1     | rs1411775  | 230243925     | T      |           |
| 151 | 1q42.2   | DISC1     |            | disrupted in schizophrenia 1                   | 414.5     | 1     | rs9727641  | 230246966     | T      |           |
| 152 | 2p12     | CTNNA2    | CAPR       | catenin (cadherin-associated protein), alpha 2 | 1,135.8   | 2     | rs4852150  | 79591630      | G      |           |
| 153 | 2p12     | CTNNA2    | CAPR       | catenin (cadherin-associated protein), alpha 2 | 1,135.8   | 2     | rs10206130 | 79604099      | G      |           |
| 154 | 2p12     | CTNNA2    | CAPR       | catenin (cadherin-associated protein), alpha 2 | 1,135.8   | 2     | rs6719738  | 79613746      | G      |           |
| 155 | 2p12     | CTNNA2    | CAPR       | catenin (cadherin-associated protein), alpha 2 | 1,135.8   | 2     | rs10520244 | 79614280      | G      |           |
| 156 | 2p12     | CTNNA2    | CAPR       | catenin (cadherin-associated protein), alpha 2 | 1,135.8   | 2     | rs1864551  | 79620045      | G      |           |
| 157 | 2p12     | CTNNA2    | CAPR       | catenin (cadherin-associated protein), alpha 2 | 1,135.8   | 2     | rs6716273  | 79622239      | G      |           |
| 158 | 2p12     | CTNNA2    | CAPR       | catenin (cadherin-associated protein), alpha 2 | 1,135.8   | 2     | rs1367399  | 79627566      | G      |           |
| 159 | 2p12     | CTNNA2    | CAPR       | catenin (cadherin-associated protein), alpha 2 | 1,135.8   | 2     | rs880813   | 79629799      | G      |           |
| 160 | 2p12     | CTNNA2    | CAPR       | catenin (cadherin-associated protein), alpha 2 | 1,135.8   | 2     | rs2566540  | 79639901      | G      |           |
| 161 | 2p12     | CTNNA2    | CAPR       | catenin (cadherin-associated protein), alpha 2 | 1,135.8   | 2     | rs1971766  | 79644485      | G      |           |
| 162 | 2p12     | CTNNA2    | CAPR       | catenin (cadherin-associated protein), alpha 2 | 1,135.8   | 2     | rs2566543  | 79651698      | G      |           |
| 163 | 2p12     | CTNNA2    | CAPR       | catenin (cadherin-associated protein), alpha 2 | 1,135.8   | 2     | rs1549761  | 79664592      | G      |           |
| 164 | 2p12     | CTNNA2    | CAPR       | catenin (cadherin-associated protein), alpha 2 | 1,135.8   | 2     | rs1430645  | 79666704      | G      |           |
| 165 | 2p12     | CTNNA2    | CAPR       | catenin (cadherin-associated protein), alpha 2 | 1,135.8   | 2     | rs1549765  | 79670651      | G      |           |
| 166 | 2p12     | CTNNA2    | CAPR       | catenin (cadherin-associated protein), alpha 2 | 1,135.8   | 2     | rs6750164  | 79676126      | G      |           |
| 167 | 2p12     | CTNNA2    | CAPR       | catenin (cadherin-associated protein), alpha 2 | 1,135.8   | 2     | rs2566552  | 79684589      | G      |           |
| 168 | 2p12     | CTNNA2    | CAPR       | catenin (cadherin-associated protein), alpha 2 | 1,135.8   | 2     | rs4852153  | 79713047      | G      |           |
| 169 | 2p12     | CTNNA2    | CAPR       | catenin (cadherin-associated protein), alpha 2 | 1,135.8   | 2     | rs13400937 | 79718431      | G      |           |

Key appears on page 109.

Complete list of all 94 genes and 1,536 SNPs present on the COGS SNP Chip

|     | K      | L      | M                                                                                                                      | N       | O       | P       | Q       |
|-----|--------|--------|------------------------------------------------------------------------------------------------------------------------|---------|---------|---------|---------|
| 1   | Prom** | TFBS** | Association (reference)                                                                                                | MAF_CEU | MAF_YRI | MAF_JPT | MAF_HCB |
| 128 |        |        |                                                                                                                        | 0.46    | 0.43    | 0.44    | 0.32    |
| 129 |        |        |                                                                                                                        | 0.11    | 0.08    | 0.38    | 0.41    |
| 130 |        |        |                                                                                                                        | 0.13    | 0.24    | 0.26    | 0.33    |
| 131 |        |        |                                                                                                                        | 0.41    | 0.36    | 0.17    | 0.21    |
| 132 |        |        |                                                                                                                        | 0.21    | 0.06    | 0.08    | 0.04    |
| 133 |        |        |                                                                                                                        | 0.26    | 0.39    | 0.21    | 0.26    |
| 134 |        |        |                                                                                                                        | 0.02    | 0.19    | 0.01    | 0.00    |
| 135 |        |        |                                                                                                                        | 0.28    | 0.41    | 0.33    | 0.40    |
| 136 |        |        | p=0.002 (Qu et al. 2007), haplotype (Callicott et al. 2005; DeRosse et al. 2007)                                       | 0.41    | 0.13    | 0.41    | 0.37    |
| 137 |        |        |                                                                                                                        | 0.09    | 0.46    | 0.19    | 0.16    |
| 138 |        |        | haplotype (Qu et al. 2007)                                                                                             | 0.20    | 0.46    |         | 0.13    |
| 139 |        |        |                                                                                                                        |         |         |         |         |
| 140 |        |        | p=0.01 (DeRosse et al. 2007), haplotype (Qu et al. 2007)                                                               | 0.41    | 0.21    | 0.32    | 0.30    |
| 141 |        |        |                                                                                                                        | 0.31    | 0.34    | 0.08    | 0.15    |
| 142 |        |        | p=0.004 (Callicott et al. 2005), p=0.005 (Qu et al. 2007), p=0.002 (DeRosse et al. 2007), halpotype (Chen et al. 2007) | 0.31    | 0.39    | 0.07    | 0.14    |
| 143 |        |        |                                                                                                                        | 0.44    | 0.24    | 0.32    | 0.36    |
| 144 |        |        |                                                                                                                        | 0.33    | 0.39    | 0.22    | 0.24    |
| 145 |        |        |                                                                                                                        | 0.44    | 0.08    | 0.39    | 0.33    |
| 146 |        |        |                                                                                                                        | 0.37    | 0.09    | 0.43    | 0.40    |
| 147 |        |        |                                                                                                                        | 0.38    | 0.36    | 0.25    | 0.28    |
| 148 |        |        |                                                                                                                        | 0.26    | 0.47    | 0.25    | 0.31    |
| 149 |        |        |                                                                                                                        | 0.04    | 0.08    | 0.21    | 0.17    |
| 150 |        |        |                                                                                                                        | 0.16    | 0.00    | 0.05    | 0.07    |
| 151 |        |        |                                                                                                                        | 0.26    | 0.24    | 0.13    | 0.11    |
| 152 |        |        |                                                                                                                        | 0.38    | 0.14    | 0.36    | 0.32    |
| 153 |        |        |                                                                                                                        | 0.28    | 0.43    | 0.44    | 0.36    |
| 154 |        |        |                                                                                                                        | 0.21    | 0.36    | 0.42    | 0.29    |
| 155 |        |        |                                                                                                                        | 0.14    | 0.00    | 0.00    | 0.00    |
| 156 |        |        |                                                                                                                        | 0.22    | 0.35    | 0.02    | 0.10    |
| 157 |        | Y      |                                                                                                                        | 0.47    | 0.28    | 0.43    | 0.37    |
| 158 |        |        |                                                                                                                        | 0.22    | 0.28    | 0.39    | 0.37    |
| 159 |        |        |                                                                                                                        | 0.28    | 0.48    | 0.42    | 0.47    |
| 160 |        |        |                                                                                                                        | 0.20    | 0.32    | 0.41    | 0.34    |
| 161 |        |        |                                                                                                                        | 0.38    | 0.38    | 0.47    | 0.48    |
| 162 |        |        |                                                                                                                        | 0.09    | 0.03    | 0.36    | 0.33    |
| 163 |        |        |                                                                                                                        | 0.18    | 0.45    | 0.36    | 0.32    |
| 164 |        |        |                                                                                                                        | 0.22    | 0.23    | 0.34    | 0.33    |
| 165 |        |        |                                                                                                                        | 0.10    | 0.18    | 0.41    | 0.34    |
| 166 |        |        |                                                                                                                        | 0.32    | 0.47    | 0.48    | 0.44    |
| 167 |        |        |                                                                                                                        | 0.14    | 0.03    | 0.35    | 0.33    |
| 168 |        |        |                                                                                                                        | 0.28    | 0.22    | 0.49    | 0.28    |
| 169 |        |        |                                                                                                                        | 0.18    | 0.10    | 0.37    | 0.24    |

Key appears on page 109.



Complete list of all 94 genes and 1,536 SNPs present on the COGS SNP Chip

|     | A        | B         | C          | D                                              | E         | F     | G          | H             | I      | J      |
|-----|----------|-----------|------------|------------------------------------------------|-----------|-------|------------|---------------|--------|--------|
| 1   | Cytoband | Gene Name | Gene Alias | Description                                    | Size (kb) | Chrom | SNP ID     | Position (bp) | htSNP* | Coding |
| 170 | 2p12     | CTNNA2    | CAPR       | catenin (cadherin-associated protein), alpha 2 | 1,135.8   | 2     | rs1430642  | 79721176      | G      |        |
| 171 | 2p12     | CTNNA2    | CAPR       | catenin (cadherin-associated protein), alpha 2 | 1,135.8   | 2     | rs3795994  | 79726512      | G      |        |
| 172 | 2p12     | CTNNA2    | CAPR       | catenin (cadherin-associated protein), alpha 2 | 1,135.8   | 2     | rs1511198  | 79737953      | G      |        |
| 173 | 2p12     | CTNNA2    | CAPR       | catenin (cadherin-associated protein), alpha 2 | 1,135.8   | 2     | rs2861854  | 79743608      | G      |        |
| 174 | 2p12     | CTNNA2    | CAPR       | catenin (cadherin-associated protein), alpha 2 | 1,135.8   | 2     | rs1567529  | 79745765      | G      |        |
| 175 | 2p12     | CTNNA2    | CAPR       | catenin (cadherin-associated protein), alpha 2 | 1,135.8   | 2     | rs2861857  | 79759614      | G      |        |
| 176 | 2p12     | CTNNA2    | CAPR       | catenin (cadherin-associated protein), alpha 2 | 1,135.8   | 2     | rs4258819  | 79760823      | G      |        |
| 177 | 2p12     | CTNNA2    | CAPR       | catenin (cadherin-associated protein), alpha 2 | 1,135.8   | 2     | rs6729255  | 79771489      | G      |        |
| 178 | 2p12     | CTNNA2    | CAPR       | catenin (cadherin-associated protein), alpha 2 | 1,135.8   | 2     | rs1511182  | 79774055      | G      |        |
| 179 | 2p12     | CTNNA2    | CAPR       | catenin (cadherin-associated protein), alpha 2 | 1,135.8   | 2     | rs6547259  | 79779235      | G      |        |
| 180 | 2p12     | CTNNA2    | CAPR       | catenin (cadherin-associated protein), alpha 2 | 1,135.8   | 2     | rs1397693  | 79788862      | G      |        |
| 181 | 2p12     | CTNNA2    | CAPR       | catenin (cadherin-associated protein), alpha 2 | 1,135.8   | 2     | rs11689331 | 79802429      | G      |        |
| 182 | 2p12     | CTNNA2    | CAPR       | catenin (cadherin-associated protein), alpha 2 | 1,135.8   | 2     | rs1397690  | 79805149      | G      |        |
| 183 | 2p12     | CTNNA2    | CAPR       | catenin (cadherin-associated protein), alpha 2 | 1,135.8   | 2     | rs4852514  | 79807254      | G      |        |
| 184 | 2p12     | CTNNA2    | CAPR       | catenin (cadherin-associated protein), alpha 2 | 1,135.8   | 2     | rs7565439  | 79816822      | G      |        |
| 185 | 2p12     | CTNNA2    | CAPR       | catenin (cadherin-associated protein), alpha 2 | 1,135.8   | 2     | rs11681484 | 79821666      | G      |        |
| 186 | 2p12     | CTNNA2    | CAPR       | catenin (cadherin-associated protein), alpha 2 | 1,135.8   | 2     | rs925404   | 79836197      | G      |        |
| 187 | 2p12     | CTNNA2    | CAPR       | catenin (cadherin-associated protein), alpha 2 | 1,135.8   | 2     | rs971476   | 79842175      | G      |        |
| 188 | 2p12     | CTNNA2    | CAPR       | catenin (cadherin-associated protein), alpha 2 | 1,135.8   | 2     | rs12713991 | 79844837      | G      |        |
| 189 | 2p12     | CTNNA2    | CAPR       | catenin (cadherin-associated protein), alpha 2 | 1,135.8   | 2     | rs1397696  | 79850281      | G      |        |
| 190 | 2p12     | CTNNA2    | CAPR       | catenin (cadherin-associated protein), alpha 2 | 1,135.8   | 2     | rs1159457  | 79855782      | G      |        |
| 191 | 2p12     | CTNNA2    | CAPR       | catenin (cadherin-associated protein), alpha 2 | 1,135.8   | 2     | rs10496232 | 79857271      | G      |        |
| 192 | 2p12     | CTNNA2    | CAPR       | catenin (cadherin-associated protein), alpha 2 | 1,135.8   | 2     | rs2102547  | 79893363      | G      |        |
| 193 | 2p12     | CTNNA2    | CAPR       | catenin (cadherin-associated protein), alpha 2 | 1,135.8   | 2     | rs1001112  | 79894431      | G      |        |
| 194 | 2p12     | CTNNA2    | CAPR       | catenin (cadherin-associated protein), alpha 2 | 1,135.8   | 2     | rs6734305  | 79908334      | G      |        |
| 195 | 2p12     | CTNNA2    | CAPR       | catenin (cadherin-associated protein), alpha 2 | 1,135.8   | 2     | rs2203051  | 79913587      | G      |        |
| 196 | 2p12     | CTNNA2    | CAPR       | catenin (cadherin-associated protein), alpha 2 | 1,135.8   | 2     | rs2974154  | 79935364      | G      |        |
| 197 | 2p12     | CTNNA2    | CAPR       | catenin (cadherin-associated protein), alpha 2 | 1,135.8   | 2     | rs10496233 | 79935726      | G      |        |
| 198 | 2p12     | CTNNA2    | CAPR       | catenin (cadherin-associated protein), alpha 2 | 1,135.8   | 2     | rs13430537 | 79963829      | G      |        |
| 199 | 2p12     | CTNNA2    | CAPR       | catenin (cadherin-associated protein), alpha 2 | 1,135.8   | 2     | rs2916508  | 79965305      | G      |        |
| 200 | 2p12     | CTNNA2    | CAPR       | catenin (cadherin-associated protein), alpha 2 | 1,135.8   | 2     | rs13414270 | 79968069      | G      |        |
| 201 | 2p12     | CTNNA2    | CAPR       | catenin (cadherin-associated protein), alpha 2 | 1,135.8   | 2     | rs989743   | 79970788      | G      |        |
| 202 | 2p12     | CTNNA2    | CAPR       | catenin (cadherin-associated protein), alpha 2 | 1,135.8   | 2     | rs13034462 | 79973002      | G      |        |
| 203 | 2p12     | CTNNA2    | CAPR       | catenin (cadherin-associated protein), alpha 2 | 1,135.8   | 2     | rs10496234 | 79973743      | G      |        |
| 204 | 2p12     | CTNNA2    | CAPR       | catenin (cadherin-associated protein), alpha 2 | 1,135.8   | 2     | rs2974173  | 79975239      | G      |        |
| 205 | 2p12     | CTNNA2    | CAPR       | catenin (cadherin-associated protein), alpha 2 | 1,135.8   | 2     | rs974736   | 80019524      | G      |        |
| 206 | 2p12     | CTNNA2    | CAPR       | catenin (cadherin-associated protein), alpha 2 | 1,135.8   | 2     | rs540905   | 80066801      | G      |        |
| 207 | 2p12     | CTNNA2    | CAPR       | catenin (cadherin-associated protein), alpha 2 | 1,135.8   | 2     | rs482602   | 80081198      | G      |        |
| 208 | 2p12     | CTNNA2    | CAPR       | catenin (cadherin-associated protein), alpha 2 | 1,135.8   | 2     | rs1368909  | 80082251      | G      |        |
| 209 | 2p12     | CTNNA2    | CAPR       | catenin (cadherin-associated protein), alpha 2 | 1,135.8   | 2     | rs1434099  | 80082649      | G      |        |
| 210 | 2p12     | CTNNA2    | CAPR       | catenin (cadherin-associated protein), alpha 2 | 1,135.8   | 2     | rs417570   | 80086053      | G      |        |
| 211 | 2p12     | CTNNA2    | CAPR       | catenin (cadherin-associated protein), alpha 2 | 1,135.8   | 2     | rs450658   | 80089547      | G      |        |

Key appears on page 109.

Complete list of all 94 genes and 1,536 SNPs present on the COGS SNP Chip

|     | K      | L      | M                       | N       | O       | P       | Q       |
|-----|--------|--------|-------------------------|---------|---------|---------|---------|
| 1   | Prom** | TFBS** | Association (reference) | MAF_CEU | MAF_YRI | MAF_JPT | MAF_HCB |
| 170 |        |        |                         | 0.50    | 0.38    | 0.24    | 0.30    |
| 171 |        |        |                         | 0.43    | 0.05    | 0.19    | 0.21    |
| 172 |        |        |                         | 0.13    | 0.33    | 0.40    | 0.44    |
| 173 |        |        |                         | 0.48    | 0.38    | 0.17    | 0.21    |
| 174 |        |        |                         | 0.21    | 0.31    | 0.16    | 0.21    |
| 175 |        |        |                         | 0.46    | 0.38    | 0.19    | 0.20    |
| 176 |        | Y      |                         | 0.28    | 0.49    | 0.08    | 0.16    |
| 177 |        |        |                         | 0.38    | 0.41    | 0.09    | 0.12    |
| 178 |        |        |                         | 0.24    | 0.19    | 0.43    | 0.49    |
| 179 |        |        |                         | 0.21    | 0.19    | 0.49    | 0.41    |
| 180 |        |        |                         | 0.18    | 0.38    | 0.38    | 0.38    |
| 181 |        |        |                         | 0.22    | 0.09    | 0.24    | 0.27    |
| 182 |        |        |                         | 0.20    | 0.05    | 0.08    | 0.08    |
| 183 |        |        |                         | 0.06    | 0.00    | 0.00    | 0.00    |
| 184 |        |        |                         | 0.26    |         | 0.22    | 0.28    |
| 185 |        |        |                         | 0.43    | 0.38    | 0.34    | 0.46    |
| 186 |        |        |                         | 0.33    | 0.14    | 0.32    | 0.21    |
| 187 |        |        |                         | 0.13    | 0.18    | 0.42    | 0.44    |
| 188 |        |        |                         | 0.49    | 0.00    | 0.05    | 0.00    |
| 189 |        |        |                         | 0.25    | 0.15    | 0.25    | 0.31    |
| 190 |        |        |                         | 0.05    | 0.05    | 0.00    | 0.01    |
| 191 |        |        |                         | 0.07    | 0.36    | 0.42    | 0.30    |
| 192 |        |        |                         | 0.49    | 0.00    | 0.03    | 0.00    |
| 193 |        |        |                         | 0.45    | 0.27    | 0.19    | 0.14    |
| 194 |        |        |                         | 0.46    | 0.28    | 0.41    | 0.40    |
| 195 |        |        |                         | 0.40    | 0.18    | 0.10    | 0.10    |
| 196 |        |        |                         | 0.19    | 0.08    | 0.16    | 0.10    |
| 197 |        |        |                         | 0.27    | 0.28    | 0.09    | 0.13    |
| 198 |        |        |                         | 0.26    | 0.20    | 0.41    | 0.30    |
| 199 |        |        |                         | 0.11    | 0.00    | 0.17    | 0.12    |
| 200 |        |        |                         | 0.27    | 0.49    | 0.31    | 0.30    |
| 201 |        |        |                         | 0.18    | 0.03    | 0.20    | 0.12    |
| 202 |        |        |                         | 0.09    | 0.13    | 0.04    | 0.06    |
| 203 |        |        |                         | 0.43    | 0.34    | 0.44    | 0.36    |
| 204 |        |        |                         | 0.27    | 0.13    | 0.07    | 0.07    |
| 205 |        |        |                         | 0.07    | 0.23    | 0.03    | 0.01    |
| 206 |        |        |                         | 0.29    | 0.33    | 0.21    | 0.34    |
| 207 |        |        |                         | 0.15    | 0.23    | 0.03    | 0.04    |
| 208 |        |        |                         | 0.47    | 0.18    | 0.15    | 0.38    |
| 209 |        |        |                         | 0.50    | 0.13    | 0.08    | 0.10    |
| 210 |        |        |                         | 0.25    | 0.36    | 0.14    | 0.23    |
| 211 |        |        |                         | 0.29    | 0.28    | 0.14    | 0.36    |

Key appears on page 109.

|     | R                                                                                                                                  |
|-----|------------------------------------------------------------------------------------------------------------------------------------|
| 1   | Sequence                                                                                                                           |
| 170 | AATATGTA...AATACATAAA...AAAGTAAACCTGAAGTATAAATTA[T/C]GTTCTCTAAATAATACCAAGATGTCATGTGTTTTCAGGGTCTGGGGAAGTACTGAACAAA                  |
| 171 | GGTAATAA...ACTGACTCAACATCATACTGCAGAGGTAGGTGAATTATCTCCACAGCTCT[A/C]TGATAATGACAGGCATTATCAGTCATTAGCTTCTTCTGAATTTGTATCAACTAAAGCTAG     |
| 172 | TTAGTAAT...TATTTTTTCTAGGAAGTATCCCTTCTTAGATGTTCTGCTTTCATCA[C/G]TGACAGGCCACACCTAATATTCTACTATACTTCTTTAACCTTTCTTGTTCGGGATTTA           |
| 173 | TTGCTTTA...CTGTTTCTGAGCCTTTAAATGTTCCAGCTGTTCCAGGCCTCCGATG[T/G]TTGGTACTCCTCTTCTTCTTCTGCAATTTCTCCCAGGTGATTCTACCCATCCCTAT             |
| 174 | GCTGGCCA...ATAAGGAAATGAAATAGGAGAAAATTTTCATACACTTGTGAAATGAGAG[A/C]CCAGGGTTTTAGAGATTGAAAGAACCTTCTTCTGATTGAGAGTGAAATCAAGGTAGG         |
| 175 | ATACATTG...TATATAGAGATAAAATCAACTGAGCTAAAAAACCCACAAATCTGAACAG[T/C]GGAGGGAGAGCCAGTGAAAGCAGTGGTGGCAGAAAACATTCCATTATAGATGCAGAAAAGTG    |
| 176 | CCACTTTT...ACCATGAATGTTTTGGTTTTGGTGTGTTTTAAATGAGGCAGCAAATAAAC[A/G]AAACAGAAAATCTCGGGATTTAGAGATTTATCTTCCCTTAGGATATCCCTCCTTCATGAA     |
| 177 | TCACACTT...GTTTTCTTGAATTTATACAGTAGGTTGTGTGTTTCAATACTGAAAAATTCA[C/G]TATTTATACATGGGGTTAACAGGTTGCATTAGGTGGTGAATATGGTTATTTGTTTTT       |
| 178 | TTGAGAAT...TGATGTTTATGTCCTAATACCTAGAGTCTACACATTTTCTGTCATTTGCTT[C/G]ATGACATACCTATTCATTTTTCTGTTTCTTTCATCTATTTTTTCAAATTTCAAAGTG       |
| 179 | AGAGGGGT...GCCTATTACAATGGTTAAACTAAGTTTGCCTCTTCAGGAGAATAATTTT[C/G]GGGGTAAATCTTTCCAAAAATTAGTGAAAATTGTTTGTAGTTCACTCAGCACATAGT         |
| 180 | CTGTAATC...AAAGAGATAAAAGCCAACATAGGAATATTTATTACAGCTTTCAGAAGGGCAA[C/G]TTGAACTACTGGGGCAAGAGTGAAACTGAAATAAGCATAGTACTGTATAAGCACGC       |
| 181 | CTACTGAAT...ATGTTTGAATTTGTTTCTCAAATCAGAGGAAGTCTCATTATTAGAAAAGT[A/G]TACTGCCACCATTGTGCATTATGGTTTTCAATTTAATAAATTTGAATGAAAATCTGAAAC    |
| 182 | ccaaagtac...gggttacaggcgtgagccaccgcccAGCCATTATTTCTTTAAAGTGG[T/C]GCTAGCATTGAACATGAACATCTTGAGTGGCTAATACTGAGTCCACTCAATCCCTTTATT       |
| 183 | gtttcacct...gaaacctccctcctccctccgacacattccccggtgaaaaattgtg[T/C]ccatgaaactggtccctggtgccaagaaggtagggaccgctGTGTAATGGGAGAATAA          |
| 184 | TTGTCACCT...CCTTTGCGTCAGAATTTGTATACTTTGTTGGTCTGCCTTTCTCTCTGAT[A/G]GTACAACATACAACATACATATATCTTTAAATCTCACAAGTATTCTGCTTTAGGAAATA      |
| 185 | GTAACATG...ATGGGAAAAATGACACTTCAGGTGGGAGAAAAGGAAAATGTGCAGTAGTGT[A/G]GAGTGGCATGCATTGTGCATAGGGTGGCAAGAGAACGGGCACGGCAACTCAGGGGAAGGAG   |
| 186 | TCCCCTTC...TTATAGAAACTTCATTTTACAAGTGTTCCTCAGAGTGAAGTTCACAGACCA[T/C]CTGGTTCAGAATCCCTGCGTGGGTATGGGAGGAGTCCATGAAAATTCATCTTGATAAGT     |
| 187 | GGAGTGA...AATTTGAGCTCAAGAACGTTTGTCTTTTTAAAGCATAAAAAGTATTTAATAACA[T/C]TGGCTTTTAAAAAGCCCTTAAAAATGTGCACGTATTTGTATGGGCTGCATAAAGGAAGAAG |
| 188 | AAAGAGAC...ACTCAGTGTAAAAATGGAGCAGAATTAAGTGAACAACATACAGTAAATTT[T/G]GCTAGCAATATTTATGAATCACCTTGTATTTAATAAAGGACATTTTCATATAAAGAATGT     |
| 189 | GTGCCTAT...CCAATAATTACAACCTGGGCTTGTGTTGAAGCTGTCTTAAGCATTAGTTAC[A/G]TTTTGAACTACTGGCCTCATAGCAGAAGTCTCTTAAATTTCTTAAAGGATGAGTTGA       |
| 190 | AATATTA...AAAAGATCCAGGGCTTTTGTGCTTCTTCCAGAAGTGTTCCTCAACTGTCATT[C/A/C]TGCTTGTCAACCATACCAATGAGAGAAACCAACTGTCCATTTATCAGCAGCTGCT       |
| 191 | TCATTACA...AAAATATGATGCCATTGTTTCATTGTTTTGAAATATGATTAACAAGCCAGT[A/G]ACAATAAGTTTGAAGTTTGAAGTACTTTATGATAAGTGGATTTAAATGCTTGAATGTG      |
| 192 | ACCCAGC...AGGTCTCTCAGTTGGGACTAGGTCTTTTATGCTTCAGGAGAAAATCTGGGTG[A/G]CAAAGTACAGCATTACTACAAATATCACTGCTAGATATGAACATAATATATTCAGATAA     |
| 193 | ATCTGAT...GAAAGTCAAGGACCTTCTTTAAGAAAAAGCACACTTATAAAAAATGTCTA[T/C]ATTAGTTTCCTAGAGTTTGCATGACAATGATATAAATGGGATACTTTAAAACAACAGAAA      |
| 194 | TCTACTGT...AAATAGAAGCAACTGTAGATGCCCTGAAAGGAATATGTATCATTATATG[T/C]CATTGGGCACAAAATATAGGTTTTTTTTAAAGTCTTATGTGTCAACAATACTTAAACAGA      |
| 195 | GTAATTTT...AAACCTTATTTGTTTTCCATTGCTACTGATTACAGTTACCCCTTTTACTTT[T/G]TTTTGTTCTTAGAAAATGAAACTGATTTAAATATTAGCCAACAGTAAAGCTTTAGGAAAAG   |
| 196 | GTAAATTT...TTTCTTTTCCAGCAGGTTGTAGTGGCTAGAGGACATCAAAGGCTTTACCGT[A/G]GAAATGTTGCTCTGAGTTAGGTCTATAATCAAGTACATGAGATTGAACAAGAATGTATAT    |
| 197 | AATCCTTA...TCAACATGAAATCACTTGTATCTGCTTAAATGAGCTTTTATGTTAATTTGC[T/G]TTGAATGAAATCATCTTCTATTTATCTTAGAATAATCTCAGAATTTAGTGTGAGTTTTCC    |
| 198 | GTCCTGCC...CTCCAAAATTGAATTTGAAACACACTTCATATTAATAGTCACGAGTGTGT[C/A/G]AACCCAGTTTTATGGGAGGCTGGATGCAGAAGTGTCTTAACATTTTATAGTTGATGAGAA   |
| 199 | ATTCTCA...ACCACATTAAGCTGAAATGTTACCCTGGTATAGCAACTCTACATAAGTTCCCTT[T/G]TCCTATTTTACCTAATTTCCCTACCTGCCTTTACCTTCTTACATTTTCTCCCTTTTT     |
| 200 | CTAATTA...AAAAACCAACATTTTCTAGGTCTAATTATGAAATCTTGAGAAAATTCAGTCA[T/C]TTTTTGGAAAATTTGATGTTTTTACATAATATAACTTTCTTGCCTGATTTTTTGGCTC      |
| 201 | ATGCTGT...GAATGCCATTTTATGTTTACATTAATATGAGATTTCTTCTGCTTTGTTGGT[C/G]TCTGAAGATTGCTCAGCGAGCACCTGGAATAAAGAGGAGCGAATGGCAGAAAAGCGGGTAG    |
| 202 | TGCAAA...TATTGACTTTAGACAGTCATGGCCATGAAACATTGTGTCCCTGCAAATAATCAC[T/G]AACCAAAGTTATACTAATTCATGCACGCCTATTCTCATTACCTGTATTAACAAAAAACCC   |
| 203 | CTGAGAA...ATCCTTGATGAGAAAATCTCATAGCAATCTCTCCCAGATCACTTTTACATA[T/C]GATAGGTAGTAAAAAATATTTGAGAATAGTTGATTGTGCCAGACTGTTGTCTCATT         |
| 204 | GCTGAAT...ATAAATTTATTATTCAGAAAAGAAGGGAAGGAAGGAACAGACAGAGGAACTCC[A/C]ATGAGGGCCAACACATGGATTAACAGTACTATGTACCTGAAAATGATAAACAGTTTAT     |
| 205 | ATTAGAT...TTTAATTTGGGTTTTAAAGCTAAGATGAATAGGTAGATAAGGTAGAAATGGTCA[A/G]AAACATACTAATGTAATAAAACCTTTGGTTCTTAAGGCTCTTGCAATTAAGACCAGGCA   |
| 206 | TTTAA...CAACTAACTTTAATTTACCACGGGAGATGTTGGTAAAAATTGTCAGACCTCTTT[A/C]AGTTTTTACGCAAATGCCAATAGCAGCTTGACATGATTGCTGCTAAGATGCCTTAATGA     |
| 207 | AAACTCT...TTTCTGCAATTTCTGATAGCTTTTGCCTTGTTCATATTTGGCCTTCACTGC[T/C]AGCCACTTCCCTCAATTAACATCCCTCTCCAAATCAATCATTGATATTACTTCTGCAA       |
| 208 | TTTCTC...CTGGGATTAGTCTAATAATTGGCAGAGATAAGAATAAAGGCCAGGAATGTGT[A/T/C]GTTTAAACCAAGGAGTGTGCAATCTATTGCAAAGGGAGAGAGAAGAACTAGCTGAGCAA    |
| 209 | TTAAATA...AATCAGAATTTACTCATTTGTGAACATACCTCTCTGACTTCCAAGTTATCT[C/T/G]TACCACACACAGAAAATGAAAAGCTTTAAACAATGTGTTTTTAAAGTCTTAGTGACAA     |
| 210 | AGCAAGA...ATGAGGCTTTCAAATCTTGTTTACCATCTCTACCATGAGTTCTATCACA[A/G]AAGTTTATCATGGTGAGCTTAACAGAGACAACCTTAAGGGGAAAAAACTTTTAGAGCACT       |
| 211 | GGGTATTT...AATCAGTCCCTTATTTAGCACATGATACTGACTATCAACTTTTGTGCAGAA[C/G]AAGATGTTAGCATGGAGGAGCTGGCTTACAGAAAATTTTAGACTTTCCGAGACTGA        |

Complete list of all 94 genes and 1,536 SNPs present on the COGS SNP Chip

|     | A        | B         | C          | D                                                        | E         | F     | G          | H             | I      | J      |
|-----|----------|-----------|------------|----------------------------------------------------------|-----------|-------|------------|---------------|--------|--------|
| 1   | Cytoband | Gene Name | Gene Alias | Description                                              | Size (kb) | Chrom | SNP ID     | Position (bp) | htSNP* | Coding |
| 212 | 2p12     | CTNNA2    | CAPR       | catenin (cadherin-associated protein), alpha 2           | 1,135.8   | 2     | rs427295   | 80092085      | G      |        |
| 213 | 2p12     | CTNNA2    | CAPR       | catenin (cadherin-associated protein), alpha 2           | 1,135.8   | 2     | rs6753378  | 80096033      | G      |        |
| 214 | 2p12     | CTNNA2    | CAPR       | catenin (cadherin-associated protein), alpha 2           | 1,135.8   | 2     | rs921637   | 80112935      | G      |        |
| 215 | 2p12     | CTNNA2    | CAPR       | catenin (cadherin-associated protein), alpha 2           | 1,135.8   | 2     | rs6729700  | 80114681      | G      |        |
| 216 | 2p12     | CTNNA2    | CAPR       | catenin (cadherin-associated protein), alpha 2           | 1,135.8   | 2     | rs1812391  | 80132155      | G      |        |
| 217 | 2p12     | CTNNA2    | CAPR       | catenin (cadherin-associated protein), alpha 2           | 1,135.8   | 2     | rs9973600  | 80136766      | G      |        |
| 218 | 2p12     | CTNNA2    | CAPR       | catenin (cadherin-associated protein), alpha 2           | 1,135.8   | 2     | rs2121309  | 80139124      | G      |        |
| 219 | 2p12     | CTNNA2    | CAPR       | catenin (cadherin-associated protein), alpha 2           | 1,135.8   | 2     | rs7605424  | 80155080      | G      |        |
| 220 | 2p12     | CTNNA2    | CAPR       | catenin (cadherin-associated protein), alpha 2           | 1,135.8   | 2     | rs4852550  | 80159781      | G      |        |
| 221 | 2p12     | CTNNA2    | CAPR       | catenin (cadherin-associated protein), alpha 2           | 1,135.8   | 2     | rs716487   | 80164159      | G      |        |
| 222 | 2p12     | CTNNA2    | CAPR       | catenin (cadherin-associated protein), alpha 2           | 1,135.8   | 2     | rs2902109  | 80171196      | G      |        |
| 223 | 2p12     | CTNNA2    | CAPR       | catenin (cadherin-associated protein), alpha 2           | 1,135.8   | 2     | rs3849389  | 80212764      | G      |        |
| 224 | 2p12     | CTNNA2    | CAPR       | catenin (cadherin-associated protein), alpha 2           | 1,135.8   | 2     | rs2862019  | 80222952      | G      |        |
| 225 | 2p12     | CTNNA2    | CAPR       | catenin (cadherin-associated protein), alpha 2           | 1,135.8   | 2     | rs1867805  | 80224823      | G      |        |
| 226 | 2p12     | CTNNA2    | CAPR       | catenin (cadherin-associated protein), alpha 2           | 1,135.8   | 2     | rs7605086  | 80228591      | G      |        |
| 227 | 2p12     | CTNNA2    | CAPR       | catenin (cadherin-associated protein), alpha 2           | 1,135.8   | 2     | rs2078520  | 80246156      | G      |        |
| 228 | 2p12     | CTNNA2    | CAPR       | catenin (cadherin-associated protein), alpha 2           | 1,135.8   | 2     | rs1443897  | 80266636      | G      |        |
| 229 | 2p12     | CTNNA2    | CAPR       | catenin (cadherin-associated protein), alpha 2           | 1,135.8   | 2     | rs894829   | 80266847      | G      |        |
| 230 | 2p12     | CTNNA2    | CAPR       | catenin (cadherin-associated protein), alpha 2           | 1,135.8   | 2     | rs980741   | 80277819      | G      |        |
| 231 | 2p12     | CTNNA2    | CAPR       | catenin (cadherin-associated protein), alpha 2           | 1,135.8   | 2     | rs1374118  | 80286561      | G      |        |
| 232 | 2p12     | CTNNA2    | CAPR       | catenin (cadherin-associated protein), alpha 2           | 1,135.8   | 2     | rs2597321  | 80321430      | G      |        |
| 233 | 2p12     | CTNNA2    | CAPR       | catenin (cadherin-associated protein), alpha 2           | 1,135.8   | 2     | rs310781   | 80323440      | G      |        |
| 234 | 2p12     | CTNNA2    | CAPR       | catenin (cadherin-associated protein), alpha 2           | 1,135.8   | 2     | rs160864   | 80331785      | G      |        |
| 235 | 2p12     | CTNNA2    | CAPR       | catenin (cadherin-associated protein), alpha 2           | 1,135.8   | 2     | rs318369   | 80342285      | G      |        |
| 236 | 2q31.1   | GAD1      |            | glutamate decarboxylase 1                                | 44.6      | 2     | rs3791878  | 171380437     | T      |        |
| 237 | 2q31.1   | GAD1      |            | glutamate decarboxylase 1                                | 44.6      | 2     | rs2241165  | 171386625     | T      |        |
| 238 | 2q31.1   | GAD1      |            | glutamate decarboxylase 1                                | 44.6      | 2     | rs3828275  | 171390986     | T      |        |
| 239 | 2q31.1   | GAD1      |            | glutamate decarboxylase 1                                | 44.6      | 2     | rs3791850  | 171416346     | T      |        |
| 240 | 2q31.1   | GAD1      |            | glutamate decarboxylase 1                                | 44.6      | 2     | rs769393   | 171417767     | T      |        |
| 241 | 2q31.1   | GAD1      |            | glutamate decarboxylase 1                                | 44.6      | 2     | rs7578661  | 171423379     | T      |        |
| 242 | 2q31.1   | GAD1      |            | glutamate decarboxylase 1                                | 44.6      | 2     | rs4297845  | 171427785     | T      |        |
| 243 | 2q34     | ERBB4     | HER4       | v-erb-a erythroblastic leukemia viral oncogene homolog 4 | 1,156.5   | 2     | rs1836724  | 211953197     | T      |        |
| 244 | 2q34     | ERBB4     | HER4       | v-erb-a erythroblastic leukemia viral oncogene homolog 4 | 1,156.5   | 2     | rs3791682  | 211957951     | T      |        |
| 245 | 2q34     | ERBB4     | HER4       | v-erb-a erythroblastic leukemia viral oncogene homolog 4 | 1,156.5   | 2     | rs1816532  | 211976485     | T      |        |
| 246 | 2q34     | ERBB4     | HER4       | v-erb-a erythroblastic leukemia viral oncogene homolog 4 | 1,156.5   | 2     | rs3791700  | 211983265     | T      |        |
| 247 | 2q34     | ERBB4     | HER4       | v-erb-a erythroblastic leukemia viral oncogene homolog 4 | 1,156.5   | 2     | rs3791703  | 211992598     | T      |        |
| 248 | 2q34     | ERBB4     | HER4       | v-erb-a erythroblastic leukemia viral oncogene homolog 4 | 1,156.5   | 2     | rs3791709  | 211995179     | T      |        |
| 249 | 2q34     | ERBB4     | HER4       | v-erb-a erythroblastic leukemia viral oncogene homolog 4 | 1,156.5   | 2     | rs10497944 | 212002670     | T      |        |
| 250 | 2q34     | ERBB4     | HER4       | v-erb-a erythroblastic leukemia viral oncogene homolog 4 | 1,156.5   | 2     | rs2033647  | 212010372     | T      |        |
| 251 | 2q34     | ERBB4     | HER4       | v-erb-a erythroblastic leukemia viral oncogene homolog 4 | 1,156.5   | 2     | rs1816531  | 212019978     | T      |        |
| 252 | 2q34     | ERBB4     | HER4       | v-erb-a erythroblastic leukemia viral oncogene homolog 4 | 1,156.5   | 2     | rs2371271  | 212024933     | T      |        |
| 253 | 2q34     | ERBB4     | HER4       | v-erb-a erythroblastic leukemia viral oncogene homolog 4 | 1,156.5   | 2     | rs1836749  | 212036235     | T      |        |

Key appears on page 109.



Complete list of all 94 genes and 1,536 SNPs present on the COGS SNP Chip

|     | K      | L      | M                               | N       | O       | P       | Q       |
|-----|--------|--------|---------------------------------|---------|---------|---------|---------|
| 1   | Prom** | TFBS** | Association (reference)         | MAF_CEU | MAF_YRI | MAF_JPT | MAF_HCB |
| 212 |        |        |                                 | 0.14    | 0.04    | 0.08    | 0.10    |
| 213 |        |        |                                 | 0.32    | 0.28    | 0.17    | 0.39    |
| 214 |        |        |                                 | 0.42    | 0.32    | 0.14    | 0.14    |
| 215 |        |        |                                 | 0.48    | 0.17    | 0.18    | 0.18    |
| 216 |        |        |                                 | 0.23    | 0.06    | 0.12    | 0.12    |
| 217 |        |        |                                 | 0.41    | 0.30    | 0.11    | 0.12    |
| 218 |        |        |                                 | 0.43    | 0.20    | 0.11    | 0.13    |
| 219 |        |        |                                 | 0.32    | 0.24    | 0.21    | 0.27    |
| 220 |        |        |                                 | 0.43    | 0.08    | 0.18    | 0.16    |
| 221 |        |        |                                 | 0.22    | 0.42    | 0.31    | 0.36    |
| 222 |        |        |                                 | 0.14    | 0.16    | 0.43    | 0.42    |
| 223 |        |        |                                 | 0.48    | 0.13    | 0.13    | 0.16    |
| 224 |        |        |                                 | 0.48    | 0.03    | 0.18    | 0.17    |
| 225 |        |        |                                 | 0.39    | 0.42    | 0.26    | 0.31    |
| 226 |        | Y      |                                 | 0.29    | 0.19    | 0.38    | 0.42    |
| 227 |        |        |                                 | 0.13    | 0.46    | 0.19    | 0.22    |
| 228 |        |        |                                 | 0.10    | 0.48    | 0.11    | 0.14    |
| 229 |        |        |                                 | 0.11    | 0.03    | 0.07    | 0.09    |
| 230 |        |        |                                 | 0.27    | 0.07    | 0.37    | 0.41    |
| 231 |        |        |                                 | 0.34    | 0.13    | 0.36    | 0.39    |
| 232 |        |        |                                 | 0.31    | 0.09    | 0.39    | 0.42    |
| 233 |        |        |                                 | 0.39    | 0.23    | 0.34    | 0.41    |
| 234 |        |        |                                 | 0.39    | 0.33    | 0.47    | 0.46    |
| 235 |        |        |                                 | 0.42    | 0.07    | 0.40    | 0.38    |
| 236 |        |        |                                 | 0.30    | 0.01    | 0.19    | 0.22    |
| 237 |        |        | p=0.016 (Addington et al. 2005) | 0.19    | 0.27    | 0.23    | 0.18    |
| 238 |        |        |                                 | 0.49    | 0.18    | 0.36    | 0.22    |
| 239 |        |        | p=0.047 (Addington et al. 2005) | 0.18    | 0.14    | 0.07    | 0.03    |
| 240 |        |        |                                 | 0.04    | 0.00    | 0.25    | 0.26    |
| 241 |        |        |                                 | 0.27    | 0.09    | 0.30    | 0.40    |
| 242 |        |        |                                 | 0.43    | 0.38    | 0.46    | 0.41    |
| 243 |        |        |                                 | 0.42    | 0.38    | 0.21    | 0.32    |
| 244 |        |        |                                 | 0.33    | 0.20    | 0.49    | 0.49    |
| 245 |        |        |                                 | 0.23    | 0.18    | 0.33    | 0.31    |
| 246 |        |        |                                 | 0.28    | 0.10    | 0.48    | 0.34    |
| 247 |        |        |                                 | 0.36    | 0.24    | 0.43    | 0.39    |
| 248 |        |        |                                 | 0.29    | 0.10    | 0.48    | 0.34    |
| 249 |        |        |                                 | 0.43    | 0.22    | 0.14    | 0.31    |
| 250 |        |        |                                 | 0.36    | 0.21    | 0.44    | 0.32    |
| 251 |        |        |                                 | 0.33    | 0.19    | 0.27    | 0.38    |
| 252 |        |        |                                 | 0.50    | 0.29    | 0.15    | 0.29    |
| 253 |        |        |                                 | 0.28    | 0.26    | 0.32    | 0.40    |

Key appears on page 109.



Complete list of all 94 genes and 1,536 SNPs present on the COGS SNP Chip

|     | A        | B         | C          | D                                                        | E         | F     | G          | H             | I      | J      |
|-----|----------|-----------|------------|----------------------------------------------------------|-----------|-------|------------|---------------|--------|--------|
| 1   | Cytoband | Gene Name | Gene Alias | Description                                              | Size (kb) | Chrom | SNP ID     | Position (bp) | htSNP* | Coding |
| 254 | 2q34     | ERBB4     | HER4       | v-erb-a erythroblastic leukemia viral oncogene homolog 4 | 1,156.5   | 2     | rs4302167  | 212041668     | T      |        |
| 255 | 2q34     | ERBB4     | HER4       | v-erb-a erythroblastic leukemia viral oncogene homolog 4 | 1,156.5   | 2     | rs4439896  | 212053703     | T      |        |
| 256 | 2q34     | ERBB4     | HER4       | v-erb-a erythroblastic leukemia viral oncogene homolog 4 | 1,156.5   | 2     | rs4672614  | 212058333     | T      |        |
| 257 | 2q34     | ERBB4     | HER4       | v-erb-a erythroblastic leukemia viral oncogene homolog 4 | 1,156.5   | 2     | rs4672615  | 212065237     | T      |        |
| 258 | 2q34     | ERBB4     | HER4       | v-erb-a erythroblastic leukemia viral oncogene homolog 4 | 1,156.5   | 2     | rs4278873  | 212069319     | T      |        |
| 259 | 2q34     | ERBB4     | HER4       | v-erb-a erythroblastic leukemia viral oncogene homolog 4 | 1,156.5   | 2     | rs4358067  | 212072729     | T      |        |
| 260 | 2q34     | ERBB4     | HER4       | v-erb-a erythroblastic leukemia viral oncogene homolog 4 | 1,156.5   | 2     | rs10932379 | 212083593     | T      |        |
| 261 | 2q34     | ERBB4     | HER4       | v-erb-a erythroblastic leukemia viral oncogene homolog 4 | 1,156.5   | 2     | rs6435632  | 212086769     | T      |        |
| 262 | 2q34     | ERBB4     | HER4       | v-erb-a erythroblastic leukemia viral oncogene homolog 4 | 1,156.5   | 2     | rs7599979  | 212091765     | T      |        |
| 263 | 2q34     | ERBB4     | HER4       | v-erb-a erythroblastic leukemia viral oncogene homolog 4 | 1,156.5   | 2     | rs10932380 | 212098595     | T      |        |
| 264 | 2q34     | ERBB4     | HER4       | v-erb-a erythroblastic leukemia viral oncogene homolog 4 | 1,156.5   | 2     | rs1851183  | 212112767     | T      |        |
| 265 | 2q34     | ERBB4     | HER4       | v-erb-a erythroblastic leukemia viral oncogene homolog 4 | 1,156.5   | 2     | rs953956   | 212121920     | T      |        |
| 266 | 2q34     | ERBB4     | HER4       | v-erb-a erythroblastic leukemia viral oncogene homolog 4 | 1,156.5   | 2     | rs10497945 | 212126355     | T      |        |
| 267 | 2q34     | ERBB4     | HER4       | v-erb-a erythroblastic leukemia viral oncogene homolog 4 | 1,156.5   | 2     | rs10497946 | 212126407     | T      |        |
| 268 | 2q34     | ERBB4     | HER4       | v-erb-a erythroblastic leukemia viral oncogene homolog 4 | 1,156.5   | 2     | rs1879531  | 212147301     | T      |        |
| 269 | 2q34     | ERBB4     | HER4       | v-erb-a erythroblastic leukemia viral oncogene homolog 4 | 1,156.5   | 2     | rs1818751  | 212162650     | T      |        |
| 270 | 2q34     | ERBB4     | HER4       | v-erb-a erythroblastic leukemia viral oncogene homolog 4 | 1,156.5   | 2     | rs1972143  | 212170367     | T      |        |
| 271 | 2q34     | ERBB4     | HER4       | v-erb-a erythroblastic leukemia viral oncogene homolog 4 | 1,156.5   | 2     | rs1851196  | 212178865     | T      |        |
| 272 | 2q34     | ERBB4     | HER4       | v-erb-a erythroblastic leukemia viral oncogene homolog 4 | 1,156.5   | 2     | rs7601664  | 212201009     | T      |        |
| 273 | 2q34     | ERBB4     | HER4       | v-erb-a erythroblastic leukemia viral oncogene homolog 4 | 1,156.5   | 2     | rs6435644  | 212213909     | T      |        |
| 274 | 2q34     | ERBB4     | HER4       | v-erb-a erythroblastic leukemia viral oncogene homolog 4 | 1,156.5   | 2     | rs6435647  | 212215478     | T      |        |
| 275 | 2q34     | ERBB4     | HER4       | v-erb-a erythroblastic leukemia viral oncogene homolog 4 | 1,156.5   | 2     | rs10932390 | 212220691     | T      |        |
| 276 | 2q34     | ERBB4     | HER4       | v-erb-a erythroblastic leukemia viral oncogene homolog 4 | 1,156.5   | 2     | rs6708035  | 212224987     | T      |        |
| 277 | 2q34     | ERBB4     | HER4       | v-erb-a erythroblastic leukemia viral oncogene homolog 4 | 1,156.5   | 2     | rs6730119  | 212227273     | T      |        |
| 278 | 2q34     | ERBB4     | HER4       | v-erb-a erythroblastic leukemia viral oncogene homolog 4 | 1,156.5   | 2     | rs6719645  | 212233218     | T      |        |
| 279 | 2q34     | ERBB4     | HER4       | v-erb-a erythroblastic leukemia viral oncogene homolog 4 | 1,156.5   | 2     | rs6719664  | 212233284     | T      |        |
| 280 | 2q34     | ERBB4     | HER4       | v-erb-a erythroblastic leukemia viral oncogene homolog 4 | 1,156.5   | 2     | rs6725181  | 212238711     | T      |        |
| 281 | 2q34     | ERBB4     | HER4       | v-erb-a erythroblastic leukemia viral oncogene homolog 4 | 1,156.5   | 2     | rs1818750  | 212243604     | T      |        |
| 282 | 2q34     | ERBB4     | HER4       | v-erb-a erythroblastic leukemia viral oncogene homolog 4 | 1,156.5   | 2     | rs10173674 | 212253778     | T      |        |
| 283 | 2q34     | ERBB4     | HER4       | v-erb-a erythroblastic leukemia viral oncogene homolog 4 | 1,156.5   | 2     | rs1829615  | 212256022     | T      |        |
| 284 | 2q34     | ERBB4     | HER4       | v-erb-a erythroblastic leukemia viral oncogene homolog 4 | 1,156.5   | 2     | rs2371276  | 212263330     | T      |        |
| 285 | 2q34     | ERBB4     | HER4       | v-erb-a erythroblastic leukemia viral oncogene homolog 4 | 1,156.5   | 2     | rs7425448  | 212266785     | T      |        |
| 286 | 2q34     | ERBB4     | HER4       | v-erb-a erythroblastic leukemia viral oncogene homolog 4 | 1,156.5   | 2     | rs10205553 | 212268193     | T      |        |
| 287 | 2q34     | ERBB4     | HER4       | v-erb-a erythroblastic leukemia viral oncogene homolog 4 | 1,156.5   | 2     | rs6435659  | 212273140     | T      |        |
| 288 | 2q34     | ERBB4     | HER4       | v-erb-a erythroblastic leukemia viral oncogene homolog 4 | 1,156.5   | 2     | rs3923755  | 212274316     | T      |        |
| 289 | 2q34     | ERBB4     | HER4       | v-erb-a erythroblastic leukemia viral oncogene homolog 4 | 1,156.5   | 2     | rs6435660  | 212280184     | T      |        |
| 290 | 2q34     | ERBB4     | HER4       | v-erb-a erythroblastic leukemia viral oncogene homolog 4 | 1,156.5   | 2     | rs6745717  | 212285476     | T      |        |
| 291 | 2q34     | ERBB4     | HER4       | v-erb-a erythroblastic leukemia viral oncogene homolog 4 | 1,156.5   | 2     | rs12162287 | 212288142     | T      |        |
| 292 | 2q34     | ERBB4     | HER4       | v-erb-a erythroblastic leukemia viral oncogene homolog 4 | 1,156.5   | 2     | rs6435665  | 212299886     | T      |        |
| 293 | 2q34     | ERBB4     | HER4       | v-erb-a erythroblastic leukemia viral oncogene homolog 4 | 1,156.5   | 2     | rs7570613  | 212337824     | T      |        |
| 294 | 2q34     | ERBB4     | HER4       | v-erb-a erythroblastic leukemia viral oncogene homolog 4 | 1,156.5   | 2     | rs13008313 | 212350533     | T      |        |
| 295 | 2q34     | ERBB4     | HER4       | v-erb-a erythroblastic leukemia viral oncogene homolog 4 | 1,156.5   | 2     | rs7423708  | 212354130     | T      |        |

Key appears on page 109.

|     | K      | L      | M                       | N       | O       | P       | Q       |
|-----|--------|--------|-------------------------|---------|---------|---------|---------|
| 1   | Prom** | TFBS** | Association (reference) | MAF_CEU | MAF_YRI | MAF_JPT | MAF_HCB |
| 254 |        |        |                         | 0.18    | 0.32    | 0.26    | 0.37    |
| 255 |        |        |                         | 0.17    | 0.48    |         | 0.33    |
| 256 |        |        |                         | 0.15    | 0.41    | 0.22    | 0.34    |
| 257 |        |        |                         | 0.22    | 0.48    | 0.25    | 0.44    |
| 258 |        |        |                         | 0.15    | 0.46    | 0.02    | 0.02    |
| 259 |        |        |                         | 0.28    | 0.40    | 0.27    | 0.47    |
| 260 |        |        |                         | 0.47    | 0.37    | 0.24    | 0.43    |
| 261 |        |        |                         | 0.28    | 0.13    | 0.39    | 0.47    |
| 262 |        | Y      |                         | 0.23    | 0.32    | 0.14    | 0.17    |
| 263 |        |        |                         | 0.30    | 0.33    | 0.14    | 0.18    |
| 264 |        |        |                         | 0.27    | 0.05    | 0.14    | 0.16    |
| 265 |        |        |                         | 0.08    | 0.48    | 0.02    | 0.01    |
| 266 |        |        |                         | 0.19    | 0.36    | 0.06    | 0.07    |
| 267 |        |        |                         | 0.01    | 0.28    | 0.05    | 0.04    |
| 268 |        |        |                         | 0.18    | 0.33    |         | 0.15    |
| 269 |        |        |                         | 0.15    | 0.42    | 0.08    | 0.08    |
| 270 |        |        |                         | 0.10    | 0.30    | 0.08    | 0.09    |
| 271 |        |        |                         | 0.10    | 0.39    | 0.23    | 0.17    |
| 272 |        |        |                         | 0.09    | 0.38    | 0.28    | 0.28    |
| 273 |        |        |                         | 0.01    | 0.08    | 0.00    | 0.00    |
| 274 |        |        |                         | 0.02    | 0.20    | 0.00    | 0.00    |
| 275 |        |        |                         | 0.20    | 0.03    | 0.28    | 0.34    |
| 276 |        |        |                         | 0.21    | 0.37    | 0.00    | 0.00    |
| 277 |        |        |                         | 0.43    | 0.33    | 0.08    | 0.11    |
| 278 |        |        |                         | 0.26    | 0.04    | 0.38    | 0.30    |
| 279 |        |        |                         | 0.08    | 0.28    | 0.00    | 0.00    |
| 280 |        |        |                         | 0.10    | 0.41    | 0.05    | 0.08    |
| 281 |        |        |                         | 0.04    | 0.00    | 0.00    | 0.00    |
| 282 |        |        |                         | 0.47    | 0.36    | 0.00    | 0.01    |
| 283 |        |        |                         | 0.49    | 0.27    | 0.05    | 0.08    |
| 284 |        |        |                         | 0.50    | 0.37    | 0.11    | 0.12    |
| 285 |        |        |                         | 0.15    | 0.14    | 0.05    | 0.03    |
| 286 |        |        |                         | 0.48    | 0.30    | 0.14    | 0.10    |
| 287 |        |        |                         | 0.44    | 0.26    | 0.33    | 0.31    |
| 288 |        |        |                         | 0.46    | 0.33    | 0.16    | 0.23    |
| 289 |        |        |                         | 0.41    | 0.39    | 0.08    | 0.10    |
| 290 |        |        |                         | 0.19    | 0.26    | 0.06    | 0.02    |
| 291 |        |        |                         | 0.28    | 0.05    | 0.47    | 0.48    |
| 292 |        |        |                         | 0.11    | 0.16    | 0.32    | 0.38    |
| 293 |        |        |                         | 0.26    | 0.09    | 0.39    | 0.47    |
| 294 |        |        |                         | 0.45    | 0.23    | 0.35    | 0.40    |
| 295 |        |        |                         | 0.28    | 0.33    | 0.19    | 0.09    |

Key appears on page 109.

|     | R                                                                                                                              |
|-----|--------------------------------------------------------------------------------------------------------------------------------|
| 1   | Sequence                                                                                                                       |
| 254 | CTTTGAGCAAATGAGGCTAATGAAAGAAAGCCACCGTGTGGTATGTTAAGAGGACAGAT[T/G]TATAAACAGGAAAAAGTTAAAATGGGACTACTTTACACCTCCAACAAATAAAATAAC      |
| 255 | TGGTGTCCAGTGTGCTACTGCCCTATCTACCTGGTGAATACTTTATCTCATTAGGC[A/G]TCACAGTTTTATCCACCAAATGATAGGGAGTGAATGTTTTGTTTTATCTCTGTCATTTT       |
| 256 | CAAGATGAACAGTCTGCTTTCTGAGATCCTGCCTTTTTAATCTGTCAATTAACCTGTTC[A/G]TTATCCTTTTTCTGTAGGAAAAACTATAGACCAGCAGGAGATTTCTTACTCTAATAA      |
| 257 | CAGTGTGCCTTAAGCACTTTCAAGGTAAGAAGAAGTCTTCACTAATTAATTCAGTTATT[T/C]TGATTTTGGGGGGAGCATTGAGTTTTGGAGTAATATATAGATGGCAAAGTTAAATCTT     |
| 258 | GTTGAACCACTCCATAAATAGACCCTATATACAGTCCCTACTTGCACCTCTGTTT[G/A/G]GCCTCTAATATGTTATGTGTGCAAATCTGTGCTCCTAATAATCTCTGCCAAATCAGGCTA     |
| 259 | ACTTCACTATAAGCATCAGAATTTTAAACAATAGGGTATTTTGTCTTTCTAGGT[A/G]AAGATACCCCAAAAAGTTCTATTTCTGAGACTATATAAACTGTTCCCAAACCAAGGTGG         |
| 260 | TTTACCTTTTTTTGAAGTTATCATTCAAAATACTCAGAATTCATGGATCTTTTCAGATGT[A/G]ATTATCTTGAATTAAGAAAATGTTTTCAATTATATATCTCTCTCTGAAAAGCTGTATGAT  |
| 261 | TAACCCCTAACAGGAAGAAGAAATACAATACAGGCTCAGGGCTCCAGACTACTAAAACAA[A/G]TGATGAGGATAATAGCTAAGGTTTTCTTTATATTTTTGGGGGGGATTAATAAATTGATTAA |
| 262 | TATCCTGTGTCTGAGATGATTGATGCATAATATAAACTCTGAAACATACAAAATGGCCA[A/T]AATTATTGAATGAATATTAAGGGGTTTTTTTTGTGTCAGGCTTAAATTTGAAAATACAGGT  |
| 263 | TTAGATGAGACTCTGAGATGTGCTGGCTTCAGGCACCAGGTGCGCCACACACTGGAGTAG[A/G]GCACCAAACAGGTTCTTGAAGTCCCAATTTTAGGCCTTGGTTCTTGGATGACATTTCTG   |
| 264 | GTGAATGTGATCCTCCCTAAGAGAGAAGGCAGAAATACAAAGGGAGGTTTTTTATGTTT[A/T]TTGTATCACGTCTAATGTTCTCAAGCAATGGAACCATTCTTTCTTATGCTGAAAACCTT    |
| 265 | AAAATCACTGAACTAGACCTTCTGGGGCTCCTTCTGCACCAACATTTCAATAGACTCTG[A/C]TAATCATTTTTAAGATTACCAGTCCACAAAAGAAAATTTCTTTGGGTTCTTTNTG        |
| 266 | TAGGAACCTGTGTAGGAAAGCATATGTGGATGAGAGACTCAGGTTCCCTGTTCCAAAGGC[A/C]AAAAATATTGAATATTAACATGAGATCCCTGCTCTCCTCAGCCTGGTATGGTCTATGA    |
| 267 | CCAAAGGCAAAAAATATTGAATATTAACATGAGATTCCTGCTCTCCTCAGCCTGGTAT[A/G]GTCTATGAACAAATGCTAAACTTTGTATCTGAAATTTAAAAGTCATATTTTAAATG        |
| 268 | AGTTAACCCAGGGAGAGCTAGCAGTATCTTCCCATCTCAACATATAACCATGAAGAG[A/T]TAAAAGATGGCTAAAGTAGATTTTGGCATTATAAGAGAACCTCAAAGACTACATAAATTT     |
| 269 | ATTCAGAAGTATTAGGCAACTTCTAAATAGATTTTCAAATTTTGAAGTACTGACATCATT[A/G]AAAAATTAGCTATTCGTTTTGATTACGTATTCTCAGTTACAAGTATTCTATATTATCAAT  |
| 270 | ATATGTGTGGATTGAAAAGAGTGTAAATAGATTCTGTACAAATGAATCCATTTATGTTA[T/G]ATGTTCTGATTATAAACTAATATACACTCATAGAAATGCAGAAAATATGTACAATGAT     |
| 271 | TGCCTTTCAAACCCAGATTGCTGGGCTCCCATGAGCTCCCAACTGTAGGTTAGCAGGA[A/G]AATTAGACCAAGATCTTTTATATCAAGATTCTAAATTCAGTATTTCTTTTACCTAAGAG     |
| 272 | CTGTGTGATTACAACACTAAGTTTTATCCTGTAAGCTTAGTCTTCACTGCTGGTATAAT[A/G]AGATCATTGACTACTAATTTAATGATCCTAATTAACATGCATTCTTGTCTGTTAGTT      |
| 273 | AAAGTGACTAGACTCCCATGCCTATGGGAATATAATAAGGCCGATGATGCCTTAAAGGGA[T/C]GTGCAGAAATCAGCAGACAGACAATTAGAAGGGAGAAGTTTTAGTTCTTTTGTATCTAT   |
| 274 | CCTCTAAATATAGGAAAGCCTCAGGACTCAATCATTGGATTTCTTACTTTCTACTTAT[A/G]CCCTAGACAGGATGTACCATCCATCTCTTATCTATGTAATGATAAGCAAGCATATTTCAG    |
| 275 | TATTTTTGAATCTTAACACTTCTCTCCATTCACTCGAATTTCTGGCTCCCAATTCCTT[C/G]ATTACTTATTTCAATAGTTTTAGCCAGCCATTACATTGATAACTAAATATTTACATT       |
| 276 | TGTTTTATTACTTCAAGTTCTATTTTATTATACTGTAAGTCACTCAGTGAAGTTGAGTA[T/C]AATATTAACATTTTAGGGTCTCTAGAAGCTTTGGTAACAATGCTGAGCATTGTGCTATC    |
| 277 | ATCCAGGCTAAATCCTTCATGTAATGTCAAATTTCTCATAAAACCTCCCTCACAAGCT[A/G]ATTGATTCTGACAAGTCAATGCAAGTGAAGAATGGAGTCACTGACATTATATTTAAGTT     |
| 278 | TGTAGGCTTTAAAGAAAGTGAAGTTGCTAGATTAGTATTTTTCAGTAAATCTCCTAGC[T/C]CTGTGGATACTAGTCAGCTGGCAGCCAGGCCGACTCATTGGCACAAAGACTATTTAGT      |
| 279 | GATACTAGTCAGCTGGCAGCCAGCCGACTCATTGGCACAAAGACTATTTAGTCCACG[T/C]AAGAGATGATGGACAAACTAGGGAAATGGTAACTGTGTTGGAGGCAGAAAGACAGATTC      |
| 280 | ATATCCTGTATGTGTGAAAACACTATAATAATGATTTGTGCTTGAATAATTTTCTTTTT[T/C]GACATAAGCAGTTCTGGGCCAACTGATTTCCATGTCATGACTCTAATGTGACTTAATTT    |
| 281 | GCATGGAAGTATAAGCACATTGAGACTGGATGGTAAAATTGTGATTCCAAAGGCTCAA[T/C]ACTACAGAACAATTCATTTAAGTACATTGAGCAATTCATTTAACATCTCTGAGATTATTT    |
| 282 | TTTTAAAGCAGACTTAGATCTATCAACAAATCTTGCTACTTCTTGAATAATCTCTTTAG[T/C]ATAGTTTAAAGAGAGAAATGTGTGTGATCTGTGTCTGTGTGCAGCAGTTTTATTGAAGTA   |
| 283 | ATATTAATTTAAAATATTTATATTATAAAACCCAAAAGATAAAATAGTGAATCAAAAGTT[A/G]TAGAGCTCATAAGCCACATATGCAGAAAAACATAAATAGAAAATAAAATCAATTTTA     |
| 284 | GAAGCTTCTCTCCAATTTATGTCAAAGCATGTAACGAAAGATCAAAGCAGTCAGCCTTT[A/G]CCCTTCCACTTACTGTAAGTGTGTGTCACCTTTAGCAGAGGTAAGGGGAAGGGACAAGAG   |
| 285 | AAACAACAGAAATTTATTCTCTCACAATTTAGAGATCAGAAGTCCAAAATCCAGGTGTT[T/C]GCAGGCTAGTTTCTTCTGGGCTCTCAGAGGGAGAATGTTCTATGGTCTCCCTAGCTT      |
| 286 | TACCTTCCATTCCCTACTTATTAACCTTTGGCCTGCTTCAATTTGGACTCACTATAAA[A/G]TTGGATGATGTTGTCATCCAGAGAGTTCAGTTATTAGCAATTAACATAGTTCTGAAATT     |
| 287 | TTTTTAAGGATGTGTTAGGAAACGAGAGTATGCCCTGATTTAGGAAACATTCATCAA[T/C]TGGTATTGAAGAAGATTCTATCTTATTGCCATGAATCATCTACTTTGGGCATGTACACA      |
| 288 | ATTTACATGTTTAAATCGGCATCCAGGTCATTTCAAGGATCCAAATTTGTGGAGATC[C/G]ACCCTATTGAATTTCTGTTTGTGTTTGGTTTCAGGGAGTTTCATAACAGAATAACAGA       |
| 289 | TACTGAGAACACTTCCATGTTGCCAGGAATGAAATGAATTTCTGGAATGTTAACATGAAGC[T/C]CAGTGGACCACAGATATTTTATACAGTTAATTTTAGAGACTCAGGACCTTGTCAAATAA  |
| 290 | ACACATACATAAGTCTTACAGAAATTTTATAAATCAATACTCCTCCTAACAACATAAAAT[T/C]ATCTATTTTCTACTTTCTTTGAAAATATCATTTTTAATGATTTTGAATGCTGGTAACTT   |
| 291 | AATTGATTACTATTTTGTATGAAAAGAGAAGTTGCTTGACCTTGAATATATGAAAGT[A/C]ATGAGCTTGTCTGAGAGAAGAAATACTGGAAAATTTGAGAAGAAAGGGAACTGGTGCA       |
| 292 | CCCTCCATAAGTTGACCACCTCTCTGCCCTCCAGGAATCACATTACTCTGTTTCTCAC[A/G]TCCAGCCAGATAGAAAACACTACTTGCAATTAAGTTGTGATTCTCATTGCTTCTTACAAG    |
| 293 | TTTGTGTCAACAAGGTCTGATTTCTAATGGGATTAATACAAATGCTCAGAAAGTTCAA[T/C]GGATTTTAGGAGGACAGGAATCCATTAGGCAAAGATGTTGAATGAGATCATTATAAAGAC    |
| 294 | TGTCATATCTCATGCCCTGAAAGAAATAGCATGGTTGACACCTATAATCCACTAATTC[T/C]ACTATCCCTACGAGGTTTACCCCAATTACAGGGTTCCTGCCTAAATGAATCATCATCAA     |
| 295 | ATCTATTTTACCTAAATATTTTATATAGAAGGAGTAACACAAGTTGGTAAATGAATAGA[T/G]GAGGTTAATTGACTCTATCTCGAGAATTTCTATTTCAAGAAAGCTAGTTATATGTAATA    |

|     | A        | B         | C          | D                                                        | E         | F     | G          | H             | I      | J      |
|-----|----------|-----------|------------|----------------------------------------------------------|-----------|-------|------------|---------------|--------|--------|
| 1   | Cytoband | Gene Name | Gene Alias | Description                                              | Size (kb) | Chrom | SNP ID     | Position (bp) | htSNP* | Coding |
| 296 | 2q34     | ERBB4     | HER4       | v-erb-a erythroblastic leukemia viral oncogene homolog 4 | 1,156.5   | 2     | rs7588431  | 212359230     | T      |        |
| 297 | 2q34     | ERBB4     | HER4       | v-erb-a erythroblastic leukemia viral oncogene homolog 4 | 1,156.5   | 2     | rs6435670  | 212364130     | T      |        |
| 298 | 2q34     | ERBB4     | HER4       | v-erb-a erythroblastic leukemia viral oncogene homolog 4 | 1,156.5   | 2     | rs4673633  | 212366542     | T      |        |
| 299 | 2q34     | ERBB4     | HER4       | v-erb-a erythroblastic leukemia viral oncogene homolog 4 | 1,156.5   | 2     | rs4672626  | 212378670     | T      |        |
| 300 | 2q34     | ERBB4     | HER4       | v-erb-a erythroblastic leukemia viral oncogene homolog 4 | 1,156.5   | 2     | rs7583346  | 212386651     | T      |        |
| 301 | 2q34     | ERBB4     | HER4       | v-erb-a erythroblastic leukemia viral oncogene homolog 4 | 1,156.5   | 2     | rs2118891  | 212387888     | T      |        |
| 302 | 2q34     | ERBB4     | HER4       | v-erb-a erythroblastic leukemia viral oncogene homolog 4 | 1,156.5   | 2     | rs991476   | 212411600     | T      |        |
| 303 | 2q34     | ERBB4     | HER4       | v-erb-a erythroblastic leukemia viral oncogene homolog 4 | 1,156.5   | 2     | rs10497952 | 212431603     | T      |        |
| 304 | 2q34     | ERBB4     | HER4       | v-erb-a erythroblastic leukemia viral oncogene homolog 4 | 1,156.5   | 2     | rs1025752  | 212431704     | T      |        |
| 305 | 2q34     | ERBB4     | HER4       | v-erb-a erythroblastic leukemia viral oncogene homolog 4 | 1,156.5   | 2     | rs1439252  | 212445389     | T      |        |
| 306 | 2q34     | ERBB4     | HER4       | v-erb-a erythroblastic leukemia viral oncogene homolog 4 | 1,156.5   | 2     | rs13390226 | 212448106     | T      |        |
| 307 | 2q34     | ERBB4     | HER4       | v-erb-a erythroblastic leukemia viral oncogene homolog 4 | 1,156.5   | 2     | rs2068401  | 212452431     | T      |        |
| 308 | 2q34     | ERBB4     | HER4       | v-erb-a erythroblastic leukemia viral oncogene homolog 4 | 1,156.5   | 2     | rs7600260  | 212457852     | T      |        |
| 309 | 2q34     | ERBB4     | HER4       | v-erb-a erythroblastic leukemia viral oncogene homolog 4 | 1,156.5   | 2     | rs4292044  | 212469397     | T      |        |
| 310 | 2q34     | ERBB4     | HER4       | v-erb-a erythroblastic leukemia viral oncogene homolog 4 | 1,156.5   | 2     | rs2043888  | 212477024     | T      |        |
| 311 | 2q34     | ERBB4     | HER4       | v-erb-a erythroblastic leukemia viral oncogene homolog 4 | 1,156.5   | 2     | rs11887994 | 212484167     | T      |        |
| 312 | 2q34     | ERBB4     | HER4       | v-erb-a erythroblastic leukemia viral oncogene homolog 4 | 1,156.5   | 2     | rs11896200 | 212491048     | T      |        |
| 313 | 2q34     | ERBB4     | HER4       | v-erb-a erythroblastic leukemia viral oncogene homolog 4 | 1,156.5   | 2     | rs7603039  | 212497140     | T      |        |
| 314 | 2q34     | ERBB4     | HER4       | v-erb-a erythroblastic leukemia viral oncogene homolog 4 | 1,156.5   | 2     | rs10497953 | 212500610     | T      |        |
| 315 | 2q34     | ERBB4     | HER4       | v-erb-a erythroblastic leukemia viral oncogene homolog 4 | 1,156.5   | 2     | rs7598440  | 212501443     | T      |        |
| 316 | 2q34     | ERBB4     | HER4       | v-erb-a erythroblastic leukemia viral oncogene homolog 4 | 1,156.5   | 2     | rs1098066  | 212508207     | T      |        |
| 317 | 2q34     | ERBB4     | HER4       | v-erb-a erythroblastic leukemia viral oncogene homolog 4 | 1,156.5   | 2     | rs839530   | 212511010     | T      |        |
| 318 | 2q34     | ERBB4     | HER4       | v-erb-a erythroblastic leukemia viral oncogene homolog 4 | 1,156.5   | 2     | rs839525   | 212523542     | T      |        |
| 319 | 2q34     | ERBB4     | HER4       | v-erb-a erythroblastic leukemia viral oncogene homolog 4 | 1,156.5   | 2     | rs839517   | 212526022     | T      |        |
| 320 | 2q34     | ERBB4     | HER4       | v-erb-a erythroblastic leukemia viral oncogene homolog 4 | 1,156.5   | 2     | rs10497955 | 212526746     | T      |        |
| 321 | 2q34     | ERBB4     | HER4       | v-erb-a erythroblastic leukemia viral oncogene homolog 4 | 1,156.5   | 2     | rs10497956 | 212528430     | T      |        |
| 322 | 2q34     | ERBB4     | HER4       | v-erb-a erythroblastic leukemia viral oncogene homolog 4 | 1,156.5   | 2     | rs990741   | 212533818     | T      |        |
| 323 | 2q34     | ERBB4     | HER4       | v-erb-a erythroblastic leukemia viral oncogene homolog 4 | 1,156.5   | 2     | rs987320   | 212538445     | T      |        |
| 324 | 2q34     | ERBB4     | HER4       | v-erb-a erythroblastic leukemia viral oncogene homolog 4 | 1,156.5   | 2     | rs2118890  | 212552847     | T      |        |
| 325 | 2q34     | ERBB4     | HER4       | v-erb-a erythroblastic leukemia viral oncogene homolog 4 | 1,156.5   | 2     | rs1521546  | 212558365     | T      |        |
| 326 | 2q34     | ERBB4     | HER4       | v-erb-a erythroblastic leukemia viral oncogene homolog 4 | 1,156.5   | 2     | rs12473886 | 212559616     | T      |        |
| 327 | 2q34     | ERBB4     | HER4       | v-erb-a erythroblastic leukemia viral oncogene homolog 4 | 1,156.5   | 2     | rs1155683  | 212560914     | T      |        |
| 328 | 2q34     | ERBB4     | HER4       | v-erb-a erythroblastic leukemia viral oncogene homolog 4 | 1,156.5   | 2     | rs1357124  | 212568293     | T      |        |
| 329 | 2q34     | ERBB4     | HER4       | v-erb-a erythroblastic leukemia viral oncogene homolog 4 | 1,156.5   | 2     | rs1402714  | 212576359     | T      |        |
| 330 | 2q34     | ERBB4     | HER4       | v-erb-a erythroblastic leukemia viral oncogene homolog 4 | 1,156.5   | 2     | rs1521539  | 212597880     | T      |        |
| 331 | 2q34     | ERBB4     | HER4       | v-erb-a erythroblastic leukemia viral oncogene homolog 4 | 1,156.5   | 2     | rs7607942  | 212604816     | T      |        |
| 332 | 2q34     | ERBB4     | HER4       | v-erb-a erythroblastic leukemia viral oncogene homolog 4 | 1,156.5   | 2     | rs1546717  | 212610584     | T      |        |
| 333 | 2q34     | ERBB4     | HER4       | v-erb-a erythroblastic leukemia viral oncogene homolog 4 | 1,156.5   | 2     | rs7582903  | 212617082     | T      |        |
| 334 | 2q34     | ERBB4     | HER4       | v-erb-a erythroblastic leukemia viral oncogene homolog 4 | 1,156.5   | 2     | rs6712126  | 212624402     | T      |        |
| 335 | 2q34     | ERBB4     | HER4       | v-erb-a erythroblastic leukemia viral oncogene homolog 4 | 1,156.5   | 2     | rs9678219  | 212645894     | T      |        |
| 336 | 2q34     | ERBB4     | HER4       | v-erb-a erythroblastic leukemia viral oncogene homolog 4 | 1,156.5   | 2     | rs1521545  | 212646410     | T      |        |
| 337 | 2q34     | ERBB4     | HER4       | v-erb-a erythroblastic leukemia viral oncogene homolog 4 | 1,156.5   | 2     | rs1521553  | 212656660     | T      |        |

|     | K      | L      | M                                | N       | O       | P       | Q       |
|-----|--------|--------|----------------------------------|---------|---------|---------|---------|
| 1   | Prom** | TFBS** | Association (reference)          | MAF_CEU | MAF_YRI | MAF_JPT | MAF_HCB |
| 296 |        |        |                                  | 0.41    | 0.35    | 0.24    | 0.13    |
| 297 |        |        |                                  | 0.31    | 0.31    | 0.05    | 0.06    |
| 298 |        |        |                                  | 0.19    | 0.22    | 0.34    | 0.36    |
| 299 |        |        |                                  | 0.09    | 0.22    | 0.13    | 0.09    |
| 300 |        |        |                                  | 0.30    | 0.02    | 0.38    | 0.44    |
| 301 |        |        |                                  | 0.08    | 0.00    | 0.26    | 0.30    |
| 302 |        |        |                                  | 0.18    | 0.13    | 0.26    | 0.30    |
| 303 |        |        |                                  | 0.21    | 0.14    | 0.22    | 0.24    |
| 304 |        |        |                                  | 0.42    | 0.47    | 0.45    | 0.42    |
| 305 |        |        |                                  | 0.36    | 0.04    | 0.47    | 0.44    |
| 306 |        |        |                                  | 0.07    | 0.30    | 0.01    | 0.02    |
| 307 |        |        |                                  | 0.47    | 0.28    | 0.35    | 0.33    |
| 308 |        |        |                                  | 0.13    | 0.23    | 0.00    | 0.00    |
| 309 |        |        |                                  | 0.05    | 0.00    | 0.00    | 0.00    |
| 310 |        |        |                                  | 0.14    | 0.00    | 0.00    | 0.00    |
| 311 |        |        |                                  | 0.27    | 0.46    | 0.21    | 0.12    |
| 312 |        |        |                                  | 0.04    | 0.33    | 0.00    | 0.00    |
| 313 |        |        |                                  | 0.21    | 0.27    | 0.40    | 0.48    |
| 314 |        |        |                                  | 0.06    | 0.04    | 0.00    | 0.00    |
| 315 |        |        | p=0.005 (Silberberg et al. 2006) | 0.47    | 0.05    | 0.48    | 0.46    |
| 316 |        |        |                                  | 0.19    | 0.12    | 0.38    | 0.39    |
| 317 |        |        |                                  | 0.12    | 0.29    | 0.10    | 0.07    |
| 318 |        |        |                                  | 0.20    | 0.31    | 0.10    | 0.09    |
| 319 |        |        |                                  | 0.30    | 0.48    | 0.39    | 0.39    |
| 320 |        |        |                                  | 0.07    | 0.00    | 0.00    | 0.00    |
| 321 |        |        |                                  | 0.04    | 0.21    | 0.00    | 0.00    |
| 322 |        |        |                                  | 0.26    | 0.19    | 0.39    | 0.39    |
| 323 |        |        |                                  | 0.08    | 0.01    | 0.28    | 0.29    |
| 324 |        |        |                                  | 0.15    | 0.38    | 0.02    | 0.01    |
| 325 |        |        |                                  | 0.11    | 0.00    | 0.00    | 0.00    |
| 326 |        |        |                                  | 0.14    | 0.28    | 0.46    | 0.44    |
| 327 |        |        |                                  | 0.18    | 0.27    | 0.46    | 0.46    |
| 328 |        |        |                                  | 0.40    | 0.36    | 0.44    | 0.40    |
| 329 |        |        |                                  | 0.03    | 0.43    | 0.47    | 0.46    |
| 330 |        |        |                                  | 0.01    | 0.39    | 0.00    | 0.00    |
| 331 |        |        |                                  | 0.37    | 0.01    | 0.02    | 0.03    |
| 332 |        |        |                                  | 0.10    | 0.18    | 0.08    | 0.03    |
| 333 |        |        |                                  | 0.28    | 0.22    | 0.08    | 0.04    |
| 334 |        |        |                                  | 0.13    | 0.43    | 0.17    | 0.04    |
| 335 |        |        |                                  | 0.13    | 0.35    | 0.08    | 0.04    |
| 336 |        |        |                                  | 0.12    | 0.45    | 0.00    | 0.00    |
| 337 |        |        |                                  | 0.36    | 0.16    | 0.17    | 0.04    |

Key appears on page 109.

| R   |                                                                                                                                |
|-----|--------------------------------------------------------------------------------------------------------------------------------|
| 1   | Sequence                                                                                                                       |
| 296 | TTCTAGGGAGTCATCAACCTAGAGGTTGCATTTAAAACCCCTGAGAGTGTCTGAGATTACC[T/C]CTGGGGAGAAGACAGAGAAATAAATTGACTAAAGATAAAACCATAATAGTCAAAAAACAG |
| 297 | AGAATAGACTAACCTGTAAGAAAGTCTTAGAGACATAAAATTTACTTGTAGAAAG[T/G]ACTGCCTAATGTTTCTGTCTTGGTTGACTACAGAGGCTTGACCGCATTITTTAGATAAGA       |
| 298 | CCAAGGCAGCAAAACCCATTTCAAGATGAAGCCACAGAAAGCAGTTACAAGACTTCTC[A/G]GACATAAAGCAATGATCTTTCTCACTGTCACCTTAAGCCACACAAGTCTGTGGCA         |
| 299 | TTGTCACAGTCAGTCAATGTGGTCTTTTCAAACCAAAAATTAATTTGTTATAAGATGAAC[A/G]ACAAGGGTGAACCAATACCAAAAATAGATAATTCAGAAGCTAGTATCTATGTCAAGATA   |
| 300 | AGTTTTTTTTCCCTTTGACTCTGTATTACTATTCCTATCCTACAAGTGTGAAATCCAAGA[T/C]ATGTAGAAAATTAAGTACTTACTTCAAGAAAGACAGGACAGTAAACTAGTTCTCATTGCC  |
| 301 | GAAATCAGAGGTGTAGGCACAGCACCTGTGGTGTTCATCAGTTTGAATGGTGTATT[C/A/G]TGTGTATAAATGTGGCATATGTAATTAAGGTCTGTGCCATAGCAACTGTAAGCACAGGC     |
| 302 | AATATTATTGAATTTTGTACATACAATAATGCCAATTTTACACTGACATTTTGGGA[T/C]ATACCCACATAAGCAGAAAATGCCTGAAACTGCAATAAGGATATGAATTGTATTTGTTTT      |
| 303 | CATGGCTCACAAAAAGCCATTTTTTTTTTTTATTTGGCCAGCAATAAAATCCTTGGCTAGC[A/G]TTTCTCTGTTAGCTATAACAAAAACCTAGTTGTAATAAGAAATAAAATTTTGGACAGA   |
| 304 | AATGAATAAATAATTAAGATACATTGCCTTTTGGAGTAGAACCACCATAACAATGCC[A/G]GATTGTTAATGAAAAGTATATTTCTATGTTACAGCTAACATCTGTCTCAAAATTTTATTT     |
| 305 | TGTGTGTACCTATGTATGGTTTTGAGTGAAGCCTATGCAAATGTCAGCAAAAGGCGGGG[A/G]TTCTTTTCAATTTTTCTTGAGAACACCAATTTTTCTGACAGTCTTGTCTTTTTAAGATT    |
| 306 | CTAAGGAACATGCAGATAACGTTTTTTTTTTTCCAAAGCAGACATATCTGCATTTCTTTG[A/G]TTGTTGGTTATTAATATTTTCAATATTTTCAAGCTACTGCAAATCCCCTTGAGATATCA   |
| 307 | TAAAATGATGTTAACCTCATTGATAATCAAATACAAATTAATAAATATATCCTATGT[T/C]TTCATCTATTACACTAGCAAATGTCAAATGGTTGTTATTGCCAGTTTGGCCAGGGTGTG      |
| 308 | TAACATTGTATTTCACTTCTTTTTTTGGCTATGTTGAGCAAATCCAAAAATTCTAAACA[A/T]AATTATAATAAAATTAGAGTCAACAATAGTATTACTCTATTCTTTTTTTCTGAAAAAT     |
| 309 | TGACTAACCTCTTTCTCCACATTCATACTTAGTCCATCATCAGTAAATCTTTCCCTGT[A/G]AAGTAGAGCCCAAATCAACAACCTTCAAAGAAATTTCTACTGCTGTCATCCTGGTCCAA     |
| 310 | ATTAGCTAAATATAGTGCTATAAGAAGAATATTCTGAAAAGAAGATTGGCTGTTTAAAGA[T/C]AAAGGAACATCAGGGTCAGCCGCTAATGTCAAAGGCAAATAAATACTGTTCCAAGTATTG  |
| 311 | ATTTCAAAACATTCTATAATGGGTAGTAAGTCAAAAATAAGTATTAATTTGAAGAGCCC[C/G]ACAGTCTTTTTTAAAGTTGGCTTAATTTCTCTGATGCAAACATGGACATCTTCATTCTG    |
| 312 | TAAGGGACCAACCTGACAGAACCTTTGAAAGTCAAGATGAAGCCAGTGGCTGGATTGAAGA[T/C]GATTCTAGCTTAATGGAGGATATCACTCTTCAAATAGATGGGAATACAAATGGAGCTGAT |
| 313 | TATGCCATGACTCATAATAGGAAAGACTTGTCCCTATTAGTCCCTTAAAGCCCTGTGGCA[A/G]CTATGGACATCCAAAGGCTGTTGCTAGGAGTCCCATAGCACACACTAAAACCTAAAGGAT  |
| 314 | TCCACATTAACAGAATGCCTTCAAGCAAAAAAGCATGACAGCCACATATGCTTTAAACTT[T/C]GGGAAACACAAATGTAGAGTGAGGAAGATAAAACCAGTCAAACAATCAGGTTCTACACTT  |
| 315 | GCACCTGTTTGTCACTGTTATCAAATGCCAGGCTGGGGGCTACCCCTGGTAAGAGGGCT[T/C]GGACTTCTTAAACCACAGAGCAACATAAACTCTCCTGTAGAAATCTTTTGTGTGCAAACA   |
| 316 | GTTTACTTATCTTCAAATAGAAAGAATCATAGTAACCTACAGTGTGGTTAACTTTAGA[T/C]GTCACCTTGACTGGATTAAGAAATACCCGGAAACCTGGTAAAGCTTTATTTTAGAGCATG    |
| 317 | TAAAACATATTTAGAAGCAATGCATGCCATCCAGAACCCTGCTGACTCAAATATAAAATA[T/C]GGTTAAGGCCCAAATCAAATGACACATTCTGTATTCTACAATTTGATGATATAAGCCT    |
| 318 | TAGGATTCTACTTCTATTGATTATTTGTAGCATGCTTATTCTAAGAATTGTGTGACT[A/G]GGGGAAAGAGTCTGAATAGAGGCTCACATATTTATTTTTATTATAAACCAACTAGAG        |
| 319 | TAAGCATTGCTTTCCACTTTTCGATTCCATTCCATCCACAGCCATTAAATGTTTCAG[T/C]GCCAGAGTCTATATTTAGGGCCATAATATACACACATAAAGTATAAGGAACCATTTCTGA     |
| 320 | TTATTAAGCCTTGAATGCTTCAAACCTTCTAGCCCAAGGGACAATTTGTTTTGCTTA[T/C]GACATTTGATGATAGAAATCAAAGATAATGGAAAACAAAAAATAATTTCCCATACCAT       |
| 321 | GCTGGAGGGTTAATAGTCCCCCTCAGATCTCTACATTTCCCAATTTCTTCTCATCTCT[T/G]ACCTTCAAGACTGTATTCTCTGATCATAGACTTATTACACTAGAGTTAGGTTTGTAAA      |
| 322 | ttaaattatcttCACCTTATTCGTTGGAACACCTTACAAGACATAGTGCCTGATGCAGAC[A/T]gatatctaatcccaatatgatggtattggaggtggggcctttgggagatgattaagtc    |
| 323 | CTCCGGTCTTTGAAGTAAAATAGAAGAAAGTGGAGATGTTACTTAGGCAAGCATCTTTCA[A/G]CACTAGAGCATTATTCAAATGTGACTATATCAGGCAAATCTTTTATGAAGATGGCATAT   |
| 324 | TGGATCAATCCCTAACTCAATAATGTTCAATTAATTGGAATATTAGATGATTTATACATCT[A/T]TGCCCATATGAACTCACCACATAGTTACTGAACCTCCATTTTCTTTCAAATTACAGAC   |
| 325 | CTTTTTCTTTACTCTTAATTTACTATCGAATCATTAGATTTTTCGGTATTTGTAATACTT[C/G]TGTTAAGTACAGTAAATTCAGCATAAAACATGGGAATATGCCTAAGATTGCTTTCTAGAA  |
| 326 | CTTGAGAGTTAGCATAGCCTATTGGTTCAAGAACCTGGGCTCTAGGGCCAGATTTCTAG[C/G]CTTGGAAATCTTTACTGTAATTTTCTCTGTGGCATAACAGGTACACTCAATGCATAGATT   |
| 327 | GGAAGTTTACTTAAAGTAATTTATACAGTTTCAAGAACTCGCCACTAAAGTTCAACATTTCT[C/A]AAGAGCTATACCTTTCTGTGACTTCATTTTTCTCAAGTACATTACAAATTTCTGGTATT |
| 328 | CCTGAGTTAAAATAACTGTCCTGGCTAATTTGAAAAATACATTTAATATTTAGTTAGAG[C/G]AACTCAATTTGATGATTGCAATAGTTCTTATGTGTAATTCGTTTAAAGTTTCTCAACGG    |
| 329 | AAAAAAATGCAGCTGAAAAGCAAATAATGATTTGAAAAACTGAGCTAAAGCGTTTTTTC[C/G]TATAACTCAATATGATGGAGCAAGTAAATAGAACAACATGAACAAAAGAGATACAGAGAA   |
| 330 | ATATCAAATGTAGTAACCAAGGACCTTGGATTCAGGACAATTTAGTTCACATTCATGC[T/C]ATCCTTTCTTGTATGTGTGATATTCAGCAAATACCAAGATTCCCTGAGCTGTCTTCTCT     |
| 331 | TATCACAAAATTTTAGAGAAGTCATTTCTGACACTTTATATTAATTTGTGTGCAGAAA[A/G]GACTCAAGGAAAGACAAGTATGGCAAAGATTATTAGGCAATTTCCCTAGTCACTAAC       |
| 332 | ATGTAAGTTAAAGTGGACACATTGGGTGTTCCAATGCAGAAGAATACAGAGAAATGCCAC[A/G]GGCTGAATATTTGGGCAAAGACTAACATTTCTTGTCTGACAAAACATGCTTTGTATTTG   |
| 333 | GTCTTAATTTTTGTTGTTGTTTATTCTGAGTGCTTTATGTGCATTGTCTAGGGTCATAA[A/G]TTTAATTAGTGTCCAACCTTAGTACTACACGGTAGTGTCTCCCAATAGTATATTTTCCAT   |
| 334 | AAATTGTTATCATTTGAGAGGTTTTATTTAAACATCATGAACTCACATAGTATTCACTAA[A/G]ACTTTTATTTTAAAGTTCTCAAACCTATGCATTTAAAGAATAATTTTAGCAATTTTCA    |
| 335 | TGCAAATGAGTGAGTATCTGGAAGTTGAGATTAATGCTAAGAAAACAAAGAAATATTGTTT[T/C]ATGAAAGCACACATCAAACAACAACAACAACAACAACCTGGACTGAGGCTTGAGAAAA   |
| 336 | TATATATTGTTCTGGCCACAATGGTGTGTGAATATTGTATATACAGCCTCATAGAATC[A/C]CTGTCAAGACCCTTATTAATATACAATTAACCTTACCAATGGATTAATTAGTCTCATA      |
| 337 | CTGGAGATAAATTTTTAAAGCAGTTCCAGAATGCTTACTTATGGGATTGTGCAATCC[A/T]ATGTTGTCAACCTATTTTGGCAGGTTTGTCTGGCATTGTTTTTTTTGGGGGGAGGGGTG      |



|     | A        | B         | C          | D                                                        | E         | F     | G          | H             | I      | J      |
|-----|----------|-----------|------------|----------------------------------------------------------|-----------|-------|------------|---------------|--------|--------|
| 1   | Cytoband | Gene Name | Gene Alias | Description                                              | Size (kb) | Chrom | SNP ID     | Position (bp) | htSNP* | Coding |
| 338 | 2q34     | ERBB4     | HER4       | v-erb-a erythroblastic leukemia viral oncogene homolog 4 | 1,156.5   | 2     | rs7564926  | 212670237     | T      |        |
| 339 | 2q34     | ERBB4     | HER4       | v-erb-a erythroblastic leukemia viral oncogene homolog 4 | 1,156.5   | 2     | rs2371438  | 212673776     | T      |        |
| 340 | 2q34     | ERBB4     | HER4       | v-erb-a erythroblastic leukemia viral oncogene homolog 4 | 1,156.5   | 2     | rs2371440  | 212678711     | T      |        |
| 341 | 2q34     | ERBB4     | HER4       | v-erb-a erythroblastic leukemia viral oncogene homolog 4 | 1,156.5   | 2     | rs11903314 | 212688244     | T      |        |
| 342 | 2q34     | ERBB4     | HER4       | v-erb-a erythroblastic leukemia viral oncogene homolog 4 | 1,156.5   | 2     | rs7426206  | 212692700     | T      |        |
| 343 | 2q34     | ERBB4     | HER4       | v-erb-a erythroblastic leukemia viral oncogene homolog 4 | 1,156.5   | 2     | rs1568519  | 212714637     | T      |        |
| 344 | 2q34     | ERBB4     | HER4       | v-erb-a erythroblastic leukemia viral oncogene homolog 4 | 1,156.5   | 2     | rs7579746  | 212725217     | T      |        |
| 345 | 2q34     | ERBB4     | HER4       | v-erb-a erythroblastic leukemia viral oncogene homolog 4 | 1,156.5   | 2     | rs1357142  | 212725707     | T      |        |
| 346 | 2q34     | ERBB4     | HER4       | v-erb-a erythroblastic leukemia viral oncogene homolog 4 | 1,156.5   | 2     | rs6737841  | 212729291     | T      |        |
| 347 | 2q34     | ERBB4     | HER4       | v-erb-a erythroblastic leukemia viral oncogene homolog 4 | 1,156.5   | 2     | rs1521657  | 212731683     | T      |        |
| 348 | 2q34     | ERBB4     | HER4       | v-erb-a erythroblastic leukemia viral oncogene homolog 4 | 1,156.5   | 2     | rs1521653  | 212736287     | T      |        |
| 349 | 2q34     | ERBB4     | HER4       | v-erb-a erythroblastic leukemia viral oncogene homolog 4 | 1,156.5   | 2     | rs939664   | 212746332     | T      |        |
| 350 | 2q34     | ERBB4     | HER4       | v-erb-a erythroblastic leukemia viral oncogene homolog 4 | 1,156.5   | 2     | rs10497961 | 212751316     | T      |        |
| 351 | 2q34     | ERBB4     | HER4       | v-erb-a erythroblastic leukemia viral oncogene homolog 4 | 1,156.5   | 2     | rs1521646  | 212752500     | T      |        |
| 352 | 2q34     | ERBB4     | HER4       | v-erb-a erythroblastic leukemia viral oncogene homolog 4 | 1,156.5   | 2     | rs1915745  | 212753019     | T      |        |
| 353 | 2q34     | ERBB4     | HER4       | v-erb-a erythroblastic leukemia viral oncogene homolog 4 | 1,156.5   | 2     | rs7608095  | 212778696     | T      |        |
| 354 | 2q34     | ERBB4     | HER4       | v-erb-a erythroblastic leukemia viral oncogene homolog 4 | 1,156.5   | 2     | rs2049180  | 212789985     | T      |        |
| 355 | 2q34     | ERBB4     | HER4       | v-erb-a erythroblastic leukemia viral oncogene homolog 4 | 1,156.5   | 2     | rs9288446  | 212790272     | T      |        |
| 356 | 2q34     | ERBB4     | HER4       | v-erb-a erythroblastic leukemia viral oncogene homolog 4 | 1,156.5   | 2     | rs1521641  | 212802134     | T      |        |
| 357 | 2q34     | ERBB4     | HER4       | v-erb-a erythroblastic leukemia viral oncogene homolog 4 | 1,156.5   | 2     | rs1402770  | 212822805     | T      |        |
| 358 | 2q34     | ERBB4     | HER4       | v-erb-a erythroblastic leukemia viral oncogene homolog 4 | 1,156.5   | 2     | rs1948875  | 212830963     | T      |        |
| 359 | 2q34     | ERBB4     | HER4       | v-erb-a erythroblastic leukemia viral oncogene homolog 4 | 1,156.5   | 2     | rs1021916  | 212841067     | T      |        |
| 360 | 2q34     | ERBB4     | HER4       | v-erb-a erythroblastic leukemia viral oncogene homolog 4 | 1,156.5   | 2     | rs2135161  | 212844992     | T      |        |
| 361 | 2q34     | ERBB4     | HER4       | v-erb-a erythroblastic leukemia viral oncogene homolog 4 | 1,156.5   | 2     | rs1568516  | 212850372     | T      |        |
| 362 | 2q34     | ERBB4     | HER4       | v-erb-a erythroblastic leukemia viral oncogene homolog 4 | 1,156.5   | 2     | rs953831   | 212859060     | T      |        |
| 363 | 2q34     | ERBB4     | HER4       | v-erb-a erythroblastic leukemia viral oncogene homolog 4 | 1,156.5   | 2     | rs1857795  | 212873152     | T      |        |
| 364 | 2q34     | ERBB4     | HER4       | v-erb-a erythroblastic leukemia viral oncogene homolog 4 | 1,156.5   | 2     | rs1505344  | 212875519     | T      |        |
| 365 | 2q34     | ERBB4     | HER4       | v-erb-a erythroblastic leukemia viral oncogene homolog 4 | 1,156.5   | 2     | rs1910866  | 212891941     | T      |        |
| 366 | 2q34     | ERBB4     | HER4       | v-erb-a erythroblastic leukemia viral oncogene homolog 4 | 1,156.5   | 2     | rs7601515  | 212898738     | T      |        |
| 367 | 2q34     | ERBB4     | HER4       | v-erb-a erythroblastic leukemia viral oncogene homolog 4 | 1,156.5   | 2     | rs1505366  | 212899634     | T      |        |
| 368 | 2q34     | ERBB4     | HER4       | v-erb-a erythroblastic leukemia viral oncogene homolog 4 | 1,156.5   | 2     | rs1505374  | 212900905     | T      |        |
| 369 | 2q34     | ERBB4     | HER4       | v-erb-a erythroblastic leukemia viral oncogene homolog 4 | 1,156.5   | 2     | rs1394785  | 212919219     | T      |        |
| 370 | 2q34     | ERBB4     | HER4       | v-erb-a erythroblastic leukemia viral oncogene homolog 4 | 1,156.5   | 2     | rs1505360  | 212920375     | T      |        |
| 371 | 2q34     | ERBB4     | HER4       | v-erb-a erythroblastic leukemia viral oncogene homolog 4 | 1,156.5   | 2     | rs10497971 | 212933104     | T      |        |
| 372 | 2q34     | ERBB4     | HER4       | v-erb-a erythroblastic leukemia viral oncogene homolog 4 | 1,156.5   | 2     | rs10497972 | 212933541     | T      |        |
| 373 | 2q34     | ERBB4     | HER4       | v-erb-a erythroblastic leukemia viral oncogene homolog 4 | 1,156.5   | 2     | rs11892564 | 212934789     | T      |        |
| 374 | 2q34     | ERBB4     | HER4       | v-erb-a erythroblastic leukemia viral oncogene homolog 4 | 1,156.5   | 2     | rs4511675  | 212941984     | T      |        |
| 375 | 2q34     | ERBB4     | HER4       | v-erb-a erythroblastic leukemia viral oncogene homolog 4 | 1,156.5   | 2     | rs1394795  | 212947747     | T      |        |
| 376 | 2q34     | ERBB4     | HER4       | v-erb-a erythroblastic leukemia viral oncogene homolog 4 | 1,156.5   | 2     | rs7575393  | 212970360     | T      |        |
| 377 | 2q34     | ERBB4     | HER4       | v-erb-a erythroblastic leukemia viral oncogene homolog 4 | 1,156.5   | 2     | rs1394796  | 212978672     | T      |        |
| 378 | 2q34     | ERBB4     | HER4       | v-erb-a erythroblastic leukemia viral oncogene homolog 4 | 1,156.5   | 2     | rs1283310  | 212982136     | T      |        |
| 379 | 2q34     | ERBB4     | HER4       | v-erb-a erythroblastic leukemia viral oncogene homolog 4 | 1,156.5   | 2     | rs13383863 | 212992266     | T      |        |

|     | K      | L      | M                       | N       | O       | P       | Q       |
|-----|--------|--------|-------------------------|---------|---------|---------|---------|
| 1   | Prom** | TFBS** | Association (reference) | MAF_CEU | MAF_YRI | MAF_JPT | MAF_HCB |
| 338 |        |        |                         | 0.18    | 0.49    | 0.00    | 0.01    |
| 339 |        |        |                         | 0.06    | 0.05    | 0.08    | 0.08    |
| 340 |        |        |                         | 0.40    |         |         |         |
| 341 |        |        |                         | 0.03    | 0.16    | 0.00    | 0.00    |
| 342 |        |        |                         | 0.35    | 0.24    | 0.22    | 0.11    |
| 343 |        |        |                         | 0.09    | 0.29    | 0.00    | 0.00    |
| 344 |        |        |                         | 0.03    | 0.19    | 0.00    | 0.00    |
| 345 |        |        |                         | 0.28    | 0.03    | 0.31    | 0.22    |
| 346 |        |        |                         | 0.01    | 0.03    | 0.00    | 0.00    |
| 347 |        |        |                         | 0.31    | 0.00    | 0.00    | 0.00    |
| 348 |        |        |                         | 0.33    | 0.38    | 0.09    | 0.09    |
| 349 |        |        |                         | 0.35    | 0.23    | 0.10    | 0.09    |
| 350 |        |        |                         | 0.10    | 0.17    | 0.00    | 0.00    |
| 351 |        |        |                         | 0.40    | 0.12    | 0.13    | 0.22    |
| 352 |        |        |                         | 0.23    | 0.13    | 0.00    | 0.00    |
| 353 |        |        |                         | 0.33    | 0.38    | 0.09    | 0.20    |
| 354 |        |        |                         | 0.50    | 0.33    | 0.12    | 0.22    |
| 355 |        |        |                         | 0.20    | 0.27    | 0.11    | 0.16    |
| 356 |        |        |                         | 0.44    | 0.34    | 0.13    | 0.21    |
| 357 |        |        |                         | 0.24    | 0.41    | 0.00    | 0.00    |
| 358 |        |        |                         | 0.46    | 0.03    | 0.13    | 0.23    |
| 359 |        |        |                         | 0.01    | 0.01    | 0.07    | 0.24    |
| 360 |        |        |                         | 0.11    | 0.22    | 0.00    | 0.00    |
| 361 |        |        |                         | 0.03    | 0.15    | 0.00    | 0.00    |
| 362 |        |        |                         | 0.09    | 0.39    | 0.01    | 0.03    |
| 363 |        |        |                         | 0.02    |         | 0.00    | 0.00    |
| 364 |        |        |                         | 0.31    | 0.06    | 0.11    | 0.14    |
| 365 |        |        |                         | 0.18    | 0.30    | 0.25    | 0.20    |
| 366 |        |        |                         | 0.19    | 0.48    | 0.24    | 0.24    |
| 367 |        |        |                         | 0.03    | 0.24    | 0.23    | 0.19    |
| 368 |        |        |                         | 0.07    | 0.03    | 0.24    | 0.19    |
| 369 |        |        |                         | 0.29    | 0.41    | 0.17    | 0.13    |
| 370 |        |        |                         | 0.43    | 0.06    | 0.17    | 0.16    |
| 371 |        |        |                         | 0.18    | 0.03    | 0.05    | 0.04    |
| 372 |        |        |                         | 0.07    | 0.36    | 0.07    | 0.03    |
| 373 |        |        |                         | 0.21    | 0.24    | 0.07    | 0.03    |
| 374 |        |        |                         | 0.30    | 0.35    | 0.10    | 0.10    |
| 375 |        |        |                         | 0.08    | 0.00    | 0.00    | 0.01    |
| 376 |        |        |                         | 0.16    | 0.41    | 0.13    | 0.10    |
| 377 |        |        |                         | 0.23    | 0.32    | 0.05    | 0.02    |
| 378 |        |        |                         | 0.48    | 0.13    | 0.17    | 0.09    |
| 379 |        |        |                         | 0.08    | 0.18    | 0.08    | 0.02    |

Key appears on page 109.

| 1   | R                                                                                                                                |
|-----|----------------------------------------------------------------------------------------------------------------------------------|
|     | Sequence                                                                                                                         |
| 338 | TAATTTTCATCATTGTTGTAACAATGTACAGGATGCTGCAGAAGGGGAGAGGGGAAAAAGTGT[A/G]CCATTACAATTTAGGAAGGCATAGTGTACTTTTATGAGGAGGTAACATGATACTGGAAAG |
| 339 | TATTCTGCCTGAGTAGGAGCAGGGAAGGTTTTAAAGAAAAGGTAAGTCTTGATCAAATAC[A/G]AACAAATTTTGGCAGCATTAGATAACTAGGCCTTGAGTCCTTTAGAGTCATTAAGCAGA     |
| 340 | CAAGCTATACAACACTGTCTGACCTAATTTGATATGGTTAACTGTGTCCCACTCAAAT[A/C]TCATCTTGAATCGTAGCTCTACAATCCCACGTGTTGTTGGGAGGGACCCAGTTGGATGT       |
| 341 | ACAGTTTTACACTTTTTTACACTTTTTGATCCTTAAATATACTATGTGACCAAC[A/G]AGAGACCTTTAAAAATGATTTGGTCTCATGCAAAATTTGTTTCATCAAGTTTAAATCTGTCT        |
| 342 | CCTTGGTAGTTGAATGTTAAACATAGTAAACTGGATTTCTCTCCCAAAAAGAAAAGTCAA[A/G]AACTGGAGGTCAGAAAGAAAGCTGGCATGAAAGGTGTTTACAGAGATAAGCATCAAGATTG   |
| 343 | ATAAATGGCACCCCTTTCCTAACTCAGGCAAAAATCTAGTCAGTCAACTATTCTCTCTTT[G]CCATAAACCAGTTATAAAAGCCACAAAACCATATGCAAAATCCATCAGCTCTTTCTTCAGA     |
| 344 | GAGTTCCTGTGGTCAAATCGGTCTCCATCATCTATTACTTTTTGTGATCTTCGGCTAATTA[T/C]TTTACTCCTATTTGGTTTCTTTATAAAAGGGAGTTATTAATAATGCCTTCCAGAATTAC    |
| 345 | CCCATACATCTAACTGCCTATTGAATATCTCCACTCATAAGTTTAAAGGCCCTTCAAGTC[T/C]AACAGTTCAAATTTAAAGTCATCCTTTTCCAGAAAGGAGCTTCTCCACTTGTGCTTCT      |
| 346 | GGGAAAAAAGGAAAGGAAAGCAGGAACAGAAACACCTGTCAGTCATGAATGACTTATTG[A/G]CCCAGTTTATCAGCAGGGGAGCTGAATTTGATCAGTTCTGCCATGATTAGTGTCACTACA     |
| 347 | AATAAACAGTGTATTCTCTAAGGAAAGAGACAATGTGCAATTCACTTTTGTGTCCACCAC[A/G]AGCTAGCCCAAGTCCACAACCTCAGCAGAGGCTCATTAAATATCTGTCAATATGAGATGAA   |
| 348 | TGTTTAGTTCCTTACCCTTATTAATGAATAGTGCCTTTATATCATTATGTTTTTCAA[A/T]TGTCATATCCTGTGAAAAGAAAACCTTGGAAAAACACAGTTTGGGTGATGGGAAACCTA        |
| 349 | ATAATGCTTCAAGGCCTTGCCTTGTACTCCCTCAGCCTGGGTACTCTTCCCTAGCT[C/G]CAGGGCTTACTTCTTCTGTTTCTGTTGTATGTTGCCTTTTTCAGAGTAGTCACCTGTATA        |
| 350 | TTTAAGGTTTTATTTTGGAAAAGCAATTAAGAGGACACTAAAGGATTTTCCAGACAAGAGAT[A/G]ATGTTAGGGCAAGATGATGATGCCCTAAAATGAGAGTTATGTAAGAAGGAGGAAAGTG    |
| 351 | GGGTGAGCAACATGATCTCTAATTCTCACACCCAACAACCCATGGTAATCTTTTCTACTC[C/G]GTGTTAATATAGCTCTTTGTTATTCCTCTCTCCTAGAATTTATCTACC                |
| 352 | TTATTTTGGCATGCAACGGCAATTATCACAAATCTCTTCAAAGGATCTGCATGGCTTT[A/G]TATTACCATTTTTAGACATAAAATTTTTATGATAATATGCATCAAATAATTGTACCCCA       |
| 353 | AAGCATTGTTACATATCAACAATAACAAATACACCATCTTTTACATGTAGGAGGGTCTTA[T/C]JAGAAATAAGTAGTCAGATACTTAGGTAATCATAGAGAGAAAATTTGAATTTTTAAATTT    |
| 354 | TTCATTTTTAAACATTCCTTGCAATATCCTTACATGTATGTGTTAAGATTGCAGATCAA[A/G]GCATCTGGTCTGTAATGCCTTGAGCACACAATAAAGAGAAAAGGTAGCATCAGACAATTAG    |
| 355 | TAAAAGGGTCTTCTGTGGAAGTATCAGAGCCAAAACCAAATTTGTCTCCAATATCTTT[C/G]TGTCATCACCCACCAAAGCTTCTTAACATCTTTGCAAGTTCAAATGTTATTTAACCTTA       |
| 356 | TCTGTTTTCCCTCTCTTCAACTTTGTCAATCTCTATTATTGTTAAGGTTTTCCCTCATTAT[A/G]TTTTCCACATTAGACTGTGTTCCCTAATTGCAACACTGTACATTATTCACCTATGTGTCA   |
| 357 | CTGCATATGAAAAGAAATCAGCC[A/G]ACATTTTTTCTATTATGGAATCAAATACTGACTTATGTATATGAATATAGTAAAGA                                             |
| 358 | GGGGTTTTGAAATATTGTTAAGCACATTATAAATGCTAAAATACTTCATAAACCCTTTT[A/G]TAAACAGGATGAATTGAGAGCTGTGAAA                                     |
| 359 | TTTCTGCTCCCTCCAAACTGCCTCAGCTTTTGTGAGATAACATTTATGGTTCCTACC[T/C]TCTTCTAGAGAATGCTAACTAGAAATTTGCATCAGGCATTTGATATAGTGGTATGTTTAA       |
| 360 | CTTATAAGGATTAATAAATTAAGTGGTTACCAATTAACATTTTTTAAAGACCTATGCCT[A/G]AGGCAGAAACTTTAGAATGTGAAAACAGAGCCTCTCCAGTTTTCATAGCAATTAACCTC      |
| 361 | TTTAATATTTTTGATGTGTGTTTATTGAGCTAATAAATGGAACCTGCAACCACAACGG[A/T]TTCTACACGATTTACCCTCCGAATAAATAAGCACAACATATTCACCGTGAATTCCTGGA       |
| 362 | ATAGTCAAATGTCAATGGGCAACATGATGTTACACGTTGGCTCCCTTGAAGTGTCTCCTC[A/G]TAATCACTTCAAATCTTACTGAGACCGAGATTTCAAAGCAAGAGGTACATATTAATTCAG    |
| 363 | GTTCCAGCAGAAGGGTACAGTGTAGATGTAATTTGTTTATTGACAATCTCCAACAATGGT[T/G]CAGTGAACCAGCAAACACCACAAAAGTAATGAATCCTTTCTCTTTTAAGTAATTATATG     |
| 364 | AAGCCATCAAATAAAGGGTGAATTAGAGTCCATTTTATTACCTCATATAATTGCAGTAC[A/G]ATAAAACATTGGCAAATATGAGTTTTCAGAAATTTCTAAGCAATCACCTTCTCTATTTTT     |
| 365 | AGCTGGGATCACTGAATTTGGATTGAAAAGTGTGGTATATCTATTATCCCAAGAACCCTGAA[T/G]CAAAGAGAACAACCTGAAAAATGGTGAGGATTGGTCCCACTGGCTCTCTGTAGCCATGGCA |
| 366 | TGCTTAGGAGAGGATGTAAGCAAAAAGCCATGTTATCAAACCTGGGTTAAATGCAGCAC[A/G]AGGTAAAGGTGTGAAATGGAGTATCATTACTAACCAAAGGTGCACCTTTTGGGTTGGGGGA    |
| 367 | CTATAGAAATGCTATTTTATATAAACATAGACGCCCTCAGTCCCTAATGCATAACCCTTT[T/G]TACCAACCAGGGCTTTGATTTTCATGCTGTCCCAAGTTGCAGACATGTTCCAGACACAG     |
| 368 | TTTTGAAAAAATAAAGGCATAGATACTTTTCTGCTTTAATCACCCCTTAAATCTCA[A/G]ATTGGCCTAATGATTTAGTATTTGTGCATCTAAATCCAAAACAGTTTCCAGTTAACAAA         |
| 369 | TTGTCAGGTGCATATCAACATTTATGTTGTCACCCTGGGCCAGCAAAACATTTAACAGAT[C/G]TGCTGTATCTATGTTTCTAAGTATTTGATACCTATTTTTATATTTCTCAATGATGGCC      |
| 370 | AATTACAACCTTGGATAAGTATTTCAAATATTCCTAACTTTGTAATTTCAAAAAAAGG[T/G]CATTGGGAATCACTAATATACCCAAAATGAACTCTGAGGAAATGACAGATATTGGAGTGT      |
| 371 | TGTGTTTGAAGGGATCTATTTGTTGAAAACCTGACACCTCACTGTCCCTAACAAAGAAC[T/C]TTTCTATCACTTCAAATGAAGGCATCCACAATGACCTACTATTCTTTACATCTAATAGA      |
| 372 | GACTCTGTAGCAACTTTTTATTAGAATAATGCCTAATCTAATGTTTGGCATATCATGG[C/G]CTCTCAGTAAATGCTGCTAAATGACCAAACCTTAGTAGCAACTGCTGATTTTTATTAATGA     |
| 373 | TGATTCATCTACAATAAAATAAATACTTCTATTCGACAATGTCTGGCATGTGGTTGTCAC[A/G]TTAGCATTTGATTAATATGAAAAACAGCAGAAGTGTGAGTTTCACTCTGCGTTTTAAAG     |
| 374 | TCTCAGGCAGGCTGTAGGCCAACCTTCTGAATTAGAATCTACCTTGAACACTATCCCA[T/G]TGACATTTGACAAGCACTGATCTAGGACTCATTAAAGTTTCTAAAACAAAGGTTGCAAAA      |
| 375 | GAAAGGTTCTTATTAGTTTGCCTCGGCTTTGGAAACTAACAAATAAAGAAAATTTGCATA[T/C]GATTTGGGGCAAGAAAATTTCTTTAGTCACTGATTTACTCTGTGGCACAATCATAGCAG     |
| 376 | GGCATGGTGGCAGCTCCTGCAGTCCCAGCTACTCAAGAGGCTGAGGCGAGAGTATCAGT[T/G]GAGCCTTAGAGGTCAAGGCTACAGTGAGCCATGATCTTGACACTGCACTCAGCCTGGGTG     |
| 377 | GTGAGGATATTTTTCACAATTAATCATGCACATCTGTTCCCTTAGATCTTCAAAGTTA[T/C]GAACATACTTCAATTTTTTGTATGCTGGCTCCTAGGGAGCAGCCACACTTAGTAAGTA        |
| 378 | TTCATTTTAATTAAGTATCCATTTTTCATGTGCTTGAACAGAAATGAATATAGCTTGGAC[A/G]GGGAACAGGTTATTTATAAAAAGGGAGATTTAAATGAGGGTAAAAATACATGGAAAGACA    |
| 379 | TTTCAAGTCAATCTACGAATGACACTACATGCTGTAACATGTAATCACTAGATTTGGAAG[T/G]GGGAGGCAAGAGTTGCCTGCATTTGAAAGTAGTGAAGACAAACATATTAATAGGAAAA      |

Complete list of all 94 genes and 1,536 SNPs present on the COGS SNP Chip

|     | A        | B         | C          | D                                                        | E         | F     | G          | H             | I      | J       |
|-----|----------|-----------|------------|----------------------------------------------------------|-----------|-------|------------|---------------|--------|---------|
| 1   | Cytoband | Gene Name | Gene Alias | Description                                              | Size (kb) | Chrom | SNP ID     | Position (bp) | htSNP* | Coding  |
| 380 | 2q34     | ERBB4     | HER4       | v-erb-a erythroblastic leukemia viral oncogene homolog 4 | 1,156.5   | 2     | rs7570330  | 212997889     | T      |         |
| 381 | 2q34     | ERBB4     | HER4       | v-erb-a erythroblastic leukemia viral oncogene homolog 4 | 1,156.5   | 2     | rs1505349  | 212999751     | T      |         |
| 382 | 2q34     | ERBB4     | HER4       | v-erb-a erythroblastic leukemia viral oncogene homolog 4 | 1,156.5   | 2     | rs2062930  | 213021330     | T      |         |
| 383 | 2q34     | ERBB4     | HER4       | v-erb-a erythroblastic leukemia viral oncogene homolog 4 | 1,156.5   | 2     | rs1505372  | 213024715     | T      |         |
| 384 | 2q34     | ERBB4     | HER4       | v-erb-a erythroblastic leukemia viral oncogene homolog 4 | 1,156.5   | 2     | rs972489   | 213025126     | T      |         |
| 385 | 2q34     | ERBB4     | HER4       | v-erb-a erythroblastic leukemia viral oncogene homolog 4 | 1,156.5   | 2     | rs7564771  | 213031181     | T      |         |
| 386 | 2q34     | ERBB4     | HER4       | v-erb-a erythroblastic leukemia viral oncogene homolog 4 | 1,156.5   | 2     | rs6435706  | 213046909     | T      |         |
| 387 | 2q34     | ERBB4     | HER4       | v-erb-a erythroblastic leukemia viral oncogene homolog 4 | 1,156.5   | 2     | rs10497974 | 213048055     | T      |         |
| 388 | 2q34     | ERBB4     | HER4       | v-erb-a erythroblastic leukemia viral oncogene homolog 4 | 1,156.5   | 2     | rs6752299  | 213056612     | T      |         |
| 389 | 2q34     | ERBB4     | HER4       | v-erb-a erythroblastic leukemia viral oncogene homolog 4 | 1,156.5   | 2     | rs979452   | 213061384     | T      |         |
| 390 | 2q34     | ERBB4     | HER4       | v-erb-a erythroblastic leukemia viral oncogene homolog 4 | 1,156.5   | 2     | rs1384295  | 213093389     | T      |         |
| 391 | 2q34     | ERBB4     | HER4       | v-erb-a erythroblastic leukemia viral oncogene homolog 4 | 1,156.5   | 2     | rs1351593  | 213102850     | T      |         |
| 392 | 2q34     | ERBB4     | HER4       | v-erb-a erythroblastic leukemia viral oncogene homolog 4 | 1,156.5   | 2     | rs1384292  | 213110886     | T      |         |
| 393 | 3p25.3   | SLC6A1    | GAT1       | solute carrier family 6, member 1 (GABA transporter)     | 46.5      | 3     | rs1728818  | 11007992      | T      |         |
| 394 | 3p25.3   | SLC6A1    | GAT1       | solute carrier family 6, member 1 (GABA transporter)     | 46.5      | 3     | rs1710887  | 11014960      | T      |         |
| 395 | 3p25.3   | SLC6A1    | GAT1       | solute carrier family 6, member 1 (GABA transporter)     | 46.5      | 3     | rs1568074  | 11016308      | T      |         |
| 396 | 3p25.3   | SLC6A1    | GAT1       | solute carrier family 6, member 1 (GABA transporter)     | 46.5      | 3     | rs1710891  | 11024133      | T      |         |
| 397 | 3p25.3   | SLC6A1    | GAT1       | solute carrier family 6, member 1 (GABA transporter)     | 46.5      | 3     | rs2697144  | 11026099      | T      |         |
| 398 | 3p25.3   | SLC6A1    | GAT1       | solute carrier family 6, member 1 (GABA transporter)     | 46.5      | 3     | rs2930154  | 11028389      | T      |         |
| 399 | 3p25.3   | SLC6A1    | GAT1       | solute carrier family 6, member 1 (GABA transporter)     | 46.5      | 3     | rs6778281  | 11028517      | T      |         |
| 400 | 3p25.3   | SLC6A1    | GAT1       | solute carrier family 6, member 1 (GABA transporter)     | 46.5      | 3     | rs1170695  | 11030338      | T      |         |
| 401 | 3p25.3   | SLC6A1    | GAT1       | solute carrier family 6, member 1 (GABA transporter)     | 46.5      | 3     | rs9876005  | 11037763      | T      |         |
| 402 | 3p25.3   | SLC6A1    | GAT1       | solute carrier family 6, member 1 (GABA transporter)     | 46.5      | 3     | rs1728802  | 11041520      | T      |         |
| 403 | 3p25.3   | SLC6A1    | GAT1       | solute carrier family 6, member 1 (GABA transporter)     | 46.5      | 3     | rs10510403 | 11041670      | T      |         |
| 404 | 3p25.3   | SLC6A1    | GAT1       | solute carrier family 6, member 1 (GABA transporter)     | 46.5      | 3     | rs11925331 | 11047167      | T      |         |
| 405 | 3p25.3   | SLC6A1    | GAT1       | solute carrier family 6, member 1 (GABA transporter)     | 46.5      | 3     | rs2675163  | 11050014      | T      |         |
| 406 | 3p25.3   | SLC6A1    | GAT1       | solute carrier family 6, member 1 (GABA transporter)     | 46.5      | 3     | rs1062246  | 11055169      | T      |         |
| 407 | 3p21.2   | GRM2      | MGLUR2     | glutamate receptor, metabotropic 2                       | 11.6      | 3     | rs4687770  | 51730105      | T      |         |
| 408 | 3q13.31  | DRD3      | D3DR       | dopamine receptor D3                                     | 50.3      | 3     | rs2399496  | 115328703     | T      |         |
| 409 | 3q13.31  | DRD3      | D3DR       | dopamine receptor D3                                     | 50.3      | 3     | rs9824856  | 115335421     | T      |         |
| 410 | 3q13.31  | DRD3      | D3DR       | dopamine receptor D3                                     | 50.3      | 3     | rs2134655  | 115340891     |        |         |
| 411 | 3q13.31  | DRD3      | D3DR       | dopamine receptor D3                                     | 50.3      | 3     | rs963468   | 115345577     | T      |         |
| 412 | 3q13.31  | DRD3      | D3DR       | dopamine receptor D3                                     | 50.3      | 3     | rs3773678  | 115352768     | T      |         |
| 413 | 3q13.31  | DRD3      | D3DR       | dopamine receptor D3                                     | 50.3      | 3     | rs2630349  | 115356062     | T      |         |
| 414 | 3q13.31  | DRD3      | D3DR       | dopamine receptor D3                                     | 50.3      | 3     | rs167771   | 115358965     | T      |         |
| 415 | 3q13.31  | DRD3      | D3DR       | dopamine receptor D3                                     | 50.3      | 3     | rs167770   | 115362252     | T      |         |
| 416 | 3q13.31  | DRD3      | D3DR       | dopamine receptor D3                                     | 50.3      | 3     | rs1486009  | 115371222     | T      |         |
| 417 | 3q13.31  | DRD3      | D3DR       | dopamine receptor D3                                     | 50.3      | 3     | rs6280     | 115373505     |        | Gly9Ser |
| 418 | 3q13.31  | DRD3      | D3DR       | dopamine receptor D3                                     | 50.3      | 3     | rs9825563  | 115382910     | T      |         |
| 419 | 3q13.33  | GSK3B     |            | glycogen synthase kinase 3 beta                          | 267.7     | 3     | rs4688043  | 121073938     | T      |         |
| 420 | 3q13.33  | GSK3B     |            | glycogen synthase kinase 3 beta                          | 267.7     | 3     | rs1381841  | 121161492     | T      |         |
| 421 | 3q13.33  | GSK3B     |            | glycogen synthase kinase 3 beta                          | 267.7     | 3     | rs11923854 | 121229259     | T      |         |

Key appears on page 109.

|     | K      | L      | M                                                                  | N       | O       | P       | Q       |
|-----|--------|--------|--------------------------------------------------------------------|---------|---------|---------|---------|
| 1   | Prom** | TFBS** | Association (reference)                                            | MAF_CEU | MAF_YRI | MAF_JPT | MAF_HCB |
| 380 |        |        |                                                                    | 0.18    | 0.04    | 0.00    | 0.00    |
| 381 |        |        |                                                                    | 0.18    | 0.00    | 0.00    | 0.00    |
| 382 |        |        |                                                                    | 0.48    | 0.48    | 0.01    | 0.04    |
| 383 |        |        |                                                                    | 0.30    | 0.25    | 0.01    | 0.04    |
| 384 |        |        |                                                                    | 0.19    | 0.06    | 0.00    | 0.00    |
| 385 |        |        |                                                                    | 0.21    | 0.08    | 0.00    | 0.00    |
| 386 |        |        |                                                                    | 0.01    | 0.25    | 0.03    | 0.04    |
| 387 |        |        |                                                                    | 0.02    | 0.34    | 0.00    | 0.00    |
| 388 |        |        |                                                                    | 0.03    | 0.25    | 0.02    | 0.04    |
| 389 |        |        |                                                                    | 0.25    | 0.05    | 0.01    | 0.00    |
| 390 |        |        |                                                                    | 0.42    | 0.07    | 0.14    | 0.07    |
| 391 |        |        |                                                                    | 0.13    | 0.25    | 0.09    | 0.03    |
| 392 |        |        |                                                                    | 0.47    | 0.17    | 0.13    | 0.06    |
| 393 |        |        |                                                                    | 0.29    | 0.44    | 0.45    | 0.47    |
| 394 |        |        |                                                                    | 0.48    | 0.20    | 0.36    | 0.46    |
| 395 |        |        |                                                                    | 0.48    | 0.28    | 0.47    | 0.50    |
| 396 |        |        |                                                                    | 0.46    | 0.42    | 0.46    | 0.40    |
| 397 |        |        |                                                                    | 0.23    | 0.16    | 0.35    | 0.36    |
| 398 |        |        |                                                                    | 0.23    | 0.00    | 0.18    | 0.17    |
| 399 |        |        |                                                                    | 0.09    | 0.20    | 0.11    | 0.13    |
| 400 |        |        |                                                                    | 0.31    | 0.43    | 0.35    | 0.40    |
| 401 |        |        |                                                                    | 0.02    | 0.35    | 0.11    | 0.14    |
| 402 |        |        |                                                                    | 0.09    | 0.00    | 0.17    | 0.13    |
| 403 |        |        |                                                                    | 0.17    | 0.18    | 0.30    | 0.23    |
| 404 |        |        |                                                                    | 0.04    | 0.45    | 0.40    | 0.32    |
| 405 |        |        |                                                                    | 0.24    | 0.11    | 0.38    | 0.32    |
| 406 |        |        |                                                                    | 0.34    | 0.28    | 0.41    | 0.44    |
| 407 |        |        |                                                                    | 0.18    | 0.49    | 0.36    | 0.40    |
| 408 |        |        |                                                                    | 0.50    | 0.31    | 0.33    | 0.44    |
| 409 |        |        |                                                                    | 0.03    | 0.38    | 0.01    | 0.01    |
| 410 |        |        | p=0.022 (Talkowski et al. 2006), haplotype (Dominguez et al. 2007) | 0.28    | 0.04    | 0.34    | 0.19    |
| 411 |        |        | haplotype (Dominguez et al. 2007)                                  | 0.36    | 0.03    | 0.32    | 0.41    |
| 412 |        |        |                                                                    | 0.13    | 0.26    | 0.17    | 0.20    |
| 413 |        |        |                                                                    | 0.08    | 0.32    | 0.15    | 0.14    |
| 414 |        |        |                                                                    | 0.17    | 0.13    | 0.18    | 0.22    |
| 415 |        |        |                                                                    | 0.29    | 0.28    | 0.24    | 0.33    |
| 416 |        |        |                                                                    | 0.07    | 0.06    | 0.00    | 0.01    |
| 417 |        |        | p=0.001 (Talkowski et al. 2006)                                    | 0.35    | 0.12    | 0.24    | 0.37    |
| 418 |        |        |                                                                    | 0.27    | 0.46    | 0.23    | 0.32    |
| 419 |        |        |                                                                    | 0.07    | 0.23    | 0.01    | 0.07    |
| 420 |        |        |                                                                    | 0.18    | 0.02    | 0.00    | 0.00    |
| 421 |        |        |                                                                    | 0.18    | 0.02    | 0.00    | 0.00    |

Key appears on page 109.

|     | R                                                                                                                              |
|-----|--------------------------------------------------------------------------------------------------------------------------------|
| 1   | Sequence                                                                                                                       |
| 380 | ATGAAAGTATAAGCACAAAGACAATTGATCAAATTATTAATTGTGGTCTTCTACTGGAGA[C/G]TATGACCCATGTCAATTTAGTTATACATAAAGAAAAATAATGGTGTAGGTGATACCTAAT  |
| 381 | AGTAAAGCCTATATTTTAAAAATAACCATTACAGATTGTGAGTGCAGTCTAGGATCACAT[A/C]GCAGAACTAAAAGCTAACTGGCCACCCACAAAGTAAATGTGAGACAGAGGGCTCGGGGT   |
| 382 | TATCTGTAACATCTTGTGCGATTAGCAAATGTAAGGCCGAAATGAATCTTTCAAACAGT[T/G]TATAAACAGTTTGAATTTCAAATATATAGACATTTTCATTCTGATGTACGCAATTCATG    |
| 383 | AGTCTGCAGTATAGTATTTACTACATGGTTGATGTTCCGGCTATACCTAAATGTTGGAAA[A/C]TATCGGAACATTACTTCAGATACTAGATTAATAATATTTGAAGTGGTGAAGTTTTAAAA   |
| 384 | ATGTGTTAATAAAAATATGCAAGGTCATTAGGCTGGCATGATTTAAGAACCCTTGGTAAGT[A/G]ATCCCTCCCTTCATCCTCCCTTCATTCCACACATAACTTTCTGCTCTACTCATGACA    |
| 385 | ATGTAAAAACAAAGCAGAAACATTGAAAGCAAATGAGTGGAGCAGGAGAGAATGATTAC[A/G]ACAAAAACTGTAATATCTTTTGAAGGACCATGCAAAGGCAGCCAAGGGGAAAATTCCA     |
| 386 | TTTCATGACAACATGAAATTTAACCATTATATGTTTTAATATCCATATTAATCCTGAATA[C/G]GAAAAAAGGTGGCTTTGACAAGTACTTCATAATAGCTAACAAAAATTCACCAATTGTAGA  |
| 387 | TGAGCCACCACAATGGGACCATTCTCCATCTTATAGCCTCTATTTCTGTTGGTTGCGTCA[A/G]TATCACCTAAGCCCTCAAGTAGAAAGCTTACAAATCTCAATCTTCTTTCTTCATAGTCT   |
| 388 | ATAGTTCAGAACTAAATGTTTTCTCTTCTCTTTGTCTAAAGAGAATATCTTGATTTAGG[A/C]CTTTAACTCCTTCTGGAACCTTTCAAGAAGCCCTCACCCATTGACTCTTTCTAAATCTGC   |
| 389 | CAATATGCTAAAATAACATTGGCCTTTAATTATAGTCATCCCTCTAGTTTTAACCTCTA[T/C]AGTCTGTCTATCCATATTGTTGTAATAATGATTTTCTAAATCACAAATCTCATCAGGTCAC  |
| 390 | GGACAAACCATGAGCTATACCTTTAAGATAAAAACCTTTAATGTAGTAGTTGAATTACC[A/G]AAATTTTATGTGCAAGAATAGTAACCCAATAAAAATAATTTTACATGCAAATAACCTTA    |
| 391 | ATCTCATGACTATGCCTTCCTTATTGTCCTTACTTTTGTGATCCCTTTCTGGAATTT[A/G]TGGCTTACTTGGTCTTTTACTTGGCCAACTTTTGAATCTTTTAAAGTTTTACTTTAAAT      |
| 392 | GCTTTGCACCTGTGTGTGCTGCTGGCGACCGCTGCGCCCCAGTCGCCGAGCCTGTGG[C/G]GTCAGACGCAACTCGCGCCAGCCCGGCGAGCCGGAGTGCAGCAGGCGGGCGCGCCTCGG      |
| 393 | ACTGTCCTAGGCTCCAGGGACAGAGCGATGGACAAGACAGGCCACAGCTTTCAAGGTGAT[C/G]CCAGTCCAGTATGGAGACAGGCTTTTCATCAAATAACCGCACAAACCCAGAATGACAAGC  |
| 394 | GAGCCAGATGAGGCCAGATCTGGTAGGAGGCAGAGCACAGAGCACTAAAGATCGAGAC[T/G]TACAAGAGAGCGTGGGAAGGCACGGCTGTGAGGCTGGGAGAAAAGGGCCGTAGCATCTT     |
| 395 | ACAGGCTTGAGGCCAGCAGAAGGCGGCTCTCCCACTTCTTCTCAGGTCTGCAAGCCCA[A/G]GCCTCGGAGCCCTGCAGCTTTGGATCTGATTCCCAGCTCTGCCCTGTGTGAGTGGTATGA    |
| 396 | TAATTAGGGGCCAGAACAGACGTTAGTAAACCACTGATCGTGTGAGCGAGACAAGCAGGA[T/C]TGGATCAGAGTGAAGTGGAGCTGGAAATGGAGTCTGACTGTCTGCTGCACACAGAAG     |
| 397 | TGGCCTGAACCTTATGGACTCCCAACTCCCAGCCAGCCGCATACTCTTACTCAAGAGATG[A/G]AGGAAAGCAGTTTCATGCCTTGGTATAAACCCCTCAGCTGCCTCAACGTACCTGAGAGGG  |
| 398 | TGCCAATCTCTGAATGACAAGATGCTTTGTAGGGAAAGAAAACATGTACAGTTTGGAAAGC[T/C]CTACATCAGAAGTGGCAAAATGGGTCAAACCTGGCCCTTGGGCTTGTTTATTTGGCCTG  |
| 399 | TCTTTGTGCTTGGTTTGGCCCCATTTTATCAATGGCTTTAACTTGGTTCATAGAGCAT[A/C]CACTGAGGAAGGATGGGATATCCTGGGAATGTTTTACCATCTTCTGCCTGGAGTGTCTT     |
| 400 | CTCATCTATAAAATGGGAAGATAATAAATACTCCTCCGAGGGTTATGGTGTGATTAATAA[T/C]GAGATCATGTGTGTAAGCATGTACAACATATGCCTGGCATATAGTTAGGGCTTAGGAAAT  |
| 401 | accagataatgtggccatagctgctcagcatcctgggcccctggcagagagtggtcaagggg[A/G]agagtgatcagagagggcaaacggagggaataaccagcataGCCAATTAGAATCACCTG |
| 402 | TGTTTAGAGTTAAAAAACGCAGTACATACAGTTTGTTCCTCATTTTGTTCCTACTAAAC[A/G]TTGTTTTATTGCCTCATGAACAATTTGACGTTTTAATGACAAAACAGTCCCTCAGAAG     |
| 403 | GAACCTCATTTTGTAAAGAAAATGTGATTGCATCTGCAAAGGAGAGTTTCAGAGGAGCATT[A/G]AAGTAGGAACATCCCTGCATTTATGTGTTTCGTCAGACAATTCTGAGTGTCTACTATATA |
| 404 | cagacaaattagatgatttggagagtgcaagtgccctggagaaaagaggacagcagca[T/C]agagaatggccagtagcagagggagggcgcctccctcagacaaggttagtcaagggaggct   |
| 405 | CATCAGGGAGAAAACAGCCCTGCCAGGAAAGCCTTTGAAGGAATGGCTGGATAGATGT[T/C]GAGTGGGAGGGACATTGAGAGTGGCAGGGGTGGAGGGGATCATGTGAGTCTCCTTTT       |
| 406 | TGTAGAGAAAAAAAATATGTGTACACATATGAACGCACAACATGCACATTCATCCTCAC[A/G]TGTGGCACGTAAGGTCTCATTTGATATTGTGTAGGAAATCTGAAGCCTTTTCTGAGGTC    |
| 407 | AAGAGTCACATTACAATGGCAGCTCTGATGATGGCCACCTCCACATTTGAGCCCTGTC[T/C]AGCAGCAGACCCTTGAGATAGAACACCAAGATCCAAGAGGAAGTGGTTACATTGGGCAAA    |
| 408 | TCTTTCTCAATAATAAATTAATCTTGGCTTACAGTCCCTTTTTTACCTATAAACTTAAA[A/T]TTTTTTTACATTTTACTCTTTTGTAAATAACACTTAGCTTAAAACACAAACACACTGG     |
| 409 | AAAGCCAGATATTCATTCATACCTCCATTCCCATGCAGCTAGAGCTCAGGCACATGCAC[A/C]AAGCCAGTCAATTGCAGATTCACACCTGAGACTTTGAACTGGAACCTGTGAAGCAGGGA    |
| 410 | TTTAGCTAAATTGGAGACACAAATCTGACACCGACTTTGGAATCTGCTAATTTTGGCTGC[A/G]CTTTGAAGGTAGGAAATCCAATCTCAAGAAAACATTGATAGTTGCCTCTAGAGCCTGCCT  |
| 411 | TCATTCAGGCATCTTCAGAGTTTCTTTGGCACCAGCACACCATGCTCTGCTGTATCAGG[A/G]TCTGTTGATGATGTGATATTTGCCTAGACTGCTGGCCTCTGCTGGGAGTTAAGGCAACC    |
| 412 | TGTTCACTCATGGCAGCAGCAGGACTCAAGGCTCAGCCCTCCTCCAAGGTGCCTCATAG[T/C]TACCCTAACAGCGAGGCCCTGTAGACATATTGACTAGAAGCCCCCGGCAGAGTCTAA      |
| 413 | AGAGTCTGTGAGGGCTGCTTTTACCATCTTTATTTGGTCAGACAGGGGGCTCAATAT[A/G]TCTTTAGTTCTGTGACTCCCTCCTGGAGTTGTTGAAGGAGAAAGCTTTTGCAAATGA        |
| 414 | CAATTTTCATCTCTTCCCAGGTTGCCCATACCTTCTCATGCTCCAAGTCTATACAAT[A/G]ATCCTCTTTCCATAAAGCCCTTTCACATTCCCACAGTCTGATTTCAGTACCCTTGAACCT     |
| 415 | CATTTTTATAAAAATTTACCTCCAAAGTAAAAATCTATCTGGCTTACGCTTGTAAAGCTT[A/G]GAAACATTCTGAAACAACATTTATGGGAATCTATGTAATAAAGTCTGTGCCAATGTGAC   |
| 416 | AGAAAACCTATATGACTACTACAGTGATTTCTTTAAGGCCCTTTGGCAAGATTTCTGT[C/A]TTTTCTATAGTCTCACCTGCCCTTCTATGCTCAGTAGTAGAATAGGAGCACCAGTATATC    |
| 417 | GTGGGCGGGCCTGGCTGGCACCTGTGGAGTTCTGTGCCACAGGTGTAGTTTCAAGGTGGC[T/C]ACTCAGCTGGCTCAGAGATGCCATAGCCAGAGGGAGGTGCGTGATGCCAAGGGGCTTCC   |
| 418 | GACCCCGTGGTGAATGGGGAGGGATTGGTGTGGAATAGAAAGAGAAGCAGGGTAAATGA[A/G]GTGATCCTTTCTCTCTGGACTTCACTATAGGTGAAGATTAGCAATTGCTCCTTTTATCTG   |
| 419 | CAAATTGGGACCTTCTGAGAGTGAAGAGGCAAGCAATTAATAATTACACTGGACAAGCA[A/T]AACTGGCACATAAGATCACCTTGTCAATTATGATTTTAAAGCTAAATTTCTAAAG        |
| 420 | TTCAAACCTTACCAGGATCCCAGCAATTGCACTCTTGGGCATATGTTTTATAGAAATAG[A/G]AAATTTACGTTTACATTAACCCGGCATATGAATGTTCAAAGCAGCTTTATTTAGAATAGC   |
| 421 | AATATTCATGACATAAGATTACATGAAAAAGCAGAGTATATAGCTACAAATTGCTATATA[T/C]TGTGATCCCAATTTTGAAAACAAATGCTACACAAACACACCAAAAAGTAAACAGTTTTCT  |

Complete list of all 94 genes and 1,536 SNPs present on the COGS SNP Chip

|     | A        | B         | C          | D                                                 | E         | F     | G          | H             | I      | J      |
|-----|----------|-----------|------------|---------------------------------------------------|-----------|-------|------------|---------------|--------|--------|
| 1   | Cytoband | Gene Name | Gene Alias | Description                                       | Size (kb) | Chrom | SNP ID     | Position (bp) | htSNP* | Coding |
| 422 | 3q13.33  | GSK3B     |            | glycogen synthase kinase 3 beta                   | 267.7     | 3     | rs10934505 | 121250012     | T      |        |
| 423 | 3q13.33  | GSK3B     |            | glycogen synthase kinase 3 beta                   | 267.7     | 3     | rs968824   | 121255730     | T      |        |
| 424 | 3q13.33  | GSK3B     |            | glycogen synthase kinase 3 beta                   | 267.7     | 3     | rs334555   | 121286826     | T      |        |
| 425 | 3q13.33  | GSK3B     |            | glycogen synthase kinase 3 beta                   | 267.7     | 3     | rs3755557  | 121297647     | T      |        |
| 426 | 4p12     | GABRB1    |            | gamma-aminobutyric acid (GABA) A receptor, beta 1 | 395.1     | 4     | rs4315750  | 46745942      | G      |        |
| 427 | 4p12     | GABRB1    |            | gamma-aminobutyric acid (GABA) A receptor, beta 1 | 395.1     | 4     | rs4694834  | 46774165      | G      |        |
| 428 | 4p12     | GABRB1    |            | gamma-aminobutyric acid (GABA) A receptor, beta 1 | 395.1     | 4     | rs6818828  | 46787693      | G      |        |
| 429 | 4p12     | GABRB1    |            | gamma-aminobutyric acid (GABA) A receptor, beta 1 | 395.1     | 4     | rs6854637  | 46793476      | G      |        |
| 430 | 4p12     | GABRB1    |            | gamma-aminobutyric acid (GABA) A receptor, beta 1 | 395.1     | 4     | rs1866989  | 46795862      | G      |        |
| 431 | 4p12     | GABRB1    |            | gamma-aminobutyric acid (GABA) A receptor, beta 1 | 395.1     | 4     | rs1470207  | 46818137      | G      |        |
| 432 | 4p12     | GABRB1    |            | gamma-aminobutyric acid (GABA) A receptor, beta 1 | 395.1     | 4     | rs1946966  | 46832233      | G      |        |
| 433 | 4p12     | GABRB1    |            | gamma-aminobutyric acid (GABA) A receptor, beta 1 | 395.1     | 4     | rs6827925  | 46851302      | G      |        |
| 434 | 4p12     | GABRB1    |            | gamma-aminobutyric acid (GABA) A receptor, beta 1 | 395.1     | 4     | rs1542097  | 46856324      | G      |        |
| 435 | 4p12     | GABRB1    |            | gamma-aminobutyric acid (GABA) A receptor, beta 1 | 395.1     | 4     | rs3822110  | 46863626      | G      |        |
| 436 | 4p12     | GABRB1    |            | gamma-aminobutyric acid (GABA) A receptor, beta 1 | 395.1     | 4     | rs2044081  | 46913097      | G      |        |
| 437 | 4p12     | GABRB1    |            | gamma-aminobutyric acid (GABA) A receptor, beta 1 | 395.1     | 4     | rs1372497  | 46917095      | G      |        |
| 438 | 4p12     | GABRB1    |            | gamma-aminobutyric acid (GABA) A receptor, beta 1 | 395.1     | 4     | rs7672100  | 46960347      | G      |        |
| 439 | 4p12     | GABRB1    |            | gamma-aminobutyric acid (GABA) A receptor, beta 1 | 395.1     | 4     | rs2078610  | 46983811      | G      |        |
| 440 | 4p12     | GABRB1    |            | gamma-aminobutyric acid (GABA) A receptor, beta 1 | 395.1     | 4     | rs4396966  | 46985892      | G      |        |
| 441 | 4p12     | GABRB1    |            | gamma-aminobutyric acid (GABA) A receptor, beta 1 | 395.1     | 4     | rs9683412  | 46997541      | G      |        |
| 442 | 4p12     | GABRB1    |            | gamma-aminobutyric acid (GABA) A receptor, beta 1 | 395.1     | 4     | rs13102109 | 46997899      | G      |        |
| 443 | 4p12     | GABRB1    |            | gamma-aminobutyric acid (GABA) A receptor, beta 1 | 395.1     | 4     | rs4235146  | 46999617      | G      |        |
| 444 | 4p12     | GABRB1    |            | gamma-aminobutyric acid (GABA) A receptor, beta 1 | 395.1     | 4     | rs4518219  | 46999789      | G      |        |
| 445 | 4p12     | GABRB1    |            | gamma-aminobutyric acid (GABA) A receptor, beta 1 | 395.1     | 4     | rs4627835  | 47005024      | G      |        |
| 446 | 4p12     | GABRB1    |            | gamma-aminobutyric acid (GABA) A receptor, beta 1 | 395.1     | 4     | rs10000697 | 47010078      | G      |        |
| 447 | 4p12     | GABRB1    |            | gamma-aminobutyric acid (GABA) A receptor, beta 1 | 395.1     | 4     | rs4599390  | 47030500      | G      |        |
| 448 | 4p12     | GABRB1    |            | gamma-aminobutyric acid (GABA) A receptor, beta 1 | 395.1     | 4     | rs728292   | 47052237      | G      |        |
| 449 | 4p12     | GABRB1    |            | gamma-aminobutyric acid (GABA) A receptor, beta 1 | 395.1     | 4     | rs6830892  | 47060562      | G      |        |
| 450 | 4p12     | GABRB1    |            | gamma-aminobutyric acid (GABA) A receptor, beta 1 | 395.1     | 4     | rs4694846  | 47063555      | G      |        |
| 451 | 4p12     | GABRB1    |            | gamma-aminobutyric acid (GABA) A receptor, beta 1 | 395.1     | 4     | rs13107066 | 47073452      | G      |        |
| 452 | 4p12     | GABRB1    |            | gamma-aminobutyric acid (GABA) A receptor, beta 1 | 395.1     | 4     | rs4695226  | 47077677      | G      |        |
| 453 | 4p12     | GABRB1    |            | gamma-aminobutyric acid (GABA) A receptor, beta 1 | 395.1     | 4     | rs7439087  | 47091757      | G      |        |
| 454 | 4p12     | GABRB1    |            | gamma-aminobutyric acid (GABA) A receptor, beta 1 | 395.1     | 4     | rs7679148  | 47111576      | G      |        |
| 455 | 4p12     | GABRB1    |            | gamma-aminobutyric acid (GABA) A receptor, beta 1 | 395.1     | 4     | rs4591574  | 47118352      | G      |        |
| 456 | 4q22.3   | GRID2     | GLURD2     | glutamate receptor, ionotropic, delta 2           | 1,467.8   | 4     | rs1513467  | 93464181      | T      |        |
| 457 | 4q22.3   | GRID2     | GLURD2     | glutamate receptor, ionotropic, delta 2           | 1,467.8   | 4     | rs13115966 | 93503757      | T      |        |
| 458 | 4q22.3   | GRID2     | GLURD2     | glutamate receptor, ionotropic, delta 2           | 1,467.8   | 4     | rs6821502  | 93511369      | T      |        |
| 459 | 4q22.3   | GRID2     | GLURD2     | glutamate receptor, ionotropic, delta 2           | 1,467.8   | 4     | rs2089990  | 93519211      | T      |        |
| 460 | 4q22.3   | GRID2     | GLURD2     | glutamate receptor, ionotropic, delta 2           | 1,467.8   | 4     | rs1513460  | 93528549      | T      |        |
| 461 | 4q22.3   | GRID2     | GLURD2     | glutamate receptor, ionotropic, delta 2           | 1,467.8   | 4     | rs6826363  | 93549155      | T      |        |
| 462 | 4q22.3   | GRID2     | GLURD2     | glutamate receptor, ionotropic, delta 2           | 1,467.8   | 4     | rs13109229 | 93551627      | T      |        |
| 463 | 4q22.3   | GRID2     | GLURD2     | glutamate receptor, ionotropic, delta 2           | 1,467.8   | 4     | rs5021051  | 93565766      | T      |        |

Key appears on page 109.

|     | K      | L      | M                       | N       | O       | P       | Q       |
|-----|--------|--------|-------------------------|---------|---------|---------|---------|
| 1   | Prom** | TFBS** | Association (reference) | MAF_CEU | MAF_YRI | MAF_JPT | MAF_HCB |
| 422 |        |        |                         | 0.06    | 0.36    | 0.50    | 0.49    |
| 423 |        |        |                         | 0.25    | 0.33    | 0.01    | 0.07    |
| 424 |        |        |                         | 0.20    | 0.00    | 0.00    | 0.00    |
| 425 |        | Y      |                         | 0.18    | 0.12    | 0.18    | 0.08    |
| 426 |        |        |                         | 0.07    | 0.32    | 0.16    | 0.16    |
| 427 |        |        |                         | 0.14    | 0.28    | 0.39    | 0.29    |
| 428 |        |        |                         | 0.32    | 0.03    | 0.03    | 0.04    |
| 429 |        |        |                         | 0.05    | 0.31    | 0.10    | 0.14    |
| 430 |        |        |                         | 0.47    | 0.40    | 0.22    | 0.21    |
| 431 |        |        |                         | 0.48    | 0.48    | 0.39    | 0.49    |
| 432 |        |        |                         | 0.48    | 0.35    | 0.40    | 0.49    |
| 433 |        |        |                         | 0.08    | 0.08    | 0.18    | 0.12    |
| 434 |        |        |                         | 0.11    | 0.08    | 0.18    | 0.12    |
| 435 |        |        |                         | 0.06    | 0.38    | 0.35    | 0.38    |
| 436 |        |        |                         | 0.08    | 0.07    | 0.05    | 0.01    |
| 437 |        |        |                         | 0.28    | 0.36    | 0.38    | 0.28    |
| 438 |        |        |                         | 0.25    | 0.09    |         | 0.02    |
| 439 |        |        |                         | 0.37    | 0.25    | 0.03    | 0.04    |
| 440 |        |        |                         | 0.47    | 0.28    | 0.26    | 0.31    |
| 441 |        |        |                         | 0.39    | 0.26    | 0.02    | 0.03    |
| 442 |        |        |                         | 0.06    | 0.00    | 0.10    | 0.00    |
| 443 |        |        |                         | 0.38    | 0.10    | 0.02    | 0.03    |
| 444 |        |        |                         | 0.28    | 0.00    | 0.02    | 0.03    |
| 445 |        |        |                         | 0.21    | 0.13    | 0.07    | 0.12    |
| 446 |        |        |                         | 0.42    | 0.30    | 0.25    | 0.31    |
| 447 |        |        |                         | 0.44    | 0.27    | 0.27    | 0.32    |
| 448 |        |        |                         | 0.43    | 0.34    | 0.01    | 0.00    |
| 449 |        |        |                         | 0.49    | 0.36    | 0.10    | 0.12    |
| 450 |        |        |                         | 0.32    | 0.45    | 0.09    | 0.12    |
| 451 |        |        |                         | 0.48    | 0.43    | 0.11    | 0.14    |
| 452 |        |        |                         | 0.47    | 0.25    | 0.10    | 0.14    |
| 453 |        |        |                         | 0.33    | 0.39    | 0.09    | 0.11    |
| 454 |        |        |                         | 0.30    | 0.34    | 0.16    | 0.08    |
| 455 |        |        |                         | 0.43    | 0.20    | 0.23    | 0.10    |
| 456 |        |        |                         | 0.05    | 0.02    | 0.00    | 0.00    |
| 457 |        |        |                         | 0.01    | 0.00    | 0.00    | 0.00    |
| 458 |        |        |                         | 0.29    | 0.43    | 0.31    | 0.22    |
| 459 |        |        |                         | 0.23    | 0.09    |         | 0.46    |
| 460 |        |        |                         | 0.29    | 0.18    | 0.33    | 0.29    |
| 461 |        |        |                         | 0.24    | 0.48    | 0.18    | 0.21    |
| 462 |        |        |                         | 0.20    | 0.30    | 0.17    | 0.24    |
| 463 |        |        |                         | 0.29    | 0.24    | 0.06    | 0.07    |

Key appears on page 109.



|     | R                                                                                                                                  |
|-----|------------------------------------------------------------------------------------------------------------------------------------|
| 1   | Sequence                                                                                                                           |
| 422 | TAAGAGCATAAACTCTGGAGCCAGACAGCCTGGGTTAAATACTGGCTCTGCCACTTACTA[A/T]CTGTATTACTTTAGCCAAGTTATTTATTTTCAGTTCCTGTGCCTCAGGCTCCTCATCTG       |
| 423 | AATGTTCTAGGGAGAGAGAGAGAGGAGGGAATGAGAGATTGAACCTAAGGATAAAAATACCA[T/C]CATCTTGAACCTTTCTAGAGAAATGTTTTTATGCTTCTTTGTTGCTCTTTTGTAAAAAT     |
| 424 | GAATATGATATACAGTACGTTGCTCTTCTATATACATGTAATTATATCTTTATTTAAAA[C/G]TCTACCAACTCAAAGCTTCCCTTCTTCCATAATTTAAGTAATGTATAGAATGTGAAA          |
| 425 | TAATTTCTACTGCAGAGTCACTCTTTCTGTTAAGATGCTGTCTCCAGAAAGCACATGT[A/T]AAAGGACCTATATTTGATCAGATTACCTGGCTCTTGCTTTGAAACACTGATGAAGGACTT        |
| 426 | GCAAATCCAAGTTTTCGTTGCTCCCTCCTTTGGCATCCATGTCATGGTTCCATAAAGGAGG[A/C]AACACAATAGTTTTCCAGTCAGGTTTGCTAGCAAAGGCGATTTGTTGTTGAGTTCAAG       |
| 427 | CTTTAGGTCACAAAATATTCAAAGGAGTTTTGTACAAAATAGTCATTAAGCCACCTAGAT[A/G]GCAAGGATGGCCTTATCATCTACCTGCAGCATAGTAGAAAAATAAAAACGAAATAGTTGG      |
| 428 | CTACTCTTCTTTCATGAGCCACCTCAAATATCATTCTTCTATGAGACATTTCCATACAA[A/T]GTCATCATCTCCTCGAAGAATATACACTTCTTATACTCTGGTGTGTTCTGTGAATTC          |
| 429 | CAAGTGGGTTGTTAAAAATGAAGACTTTTTCCAGATGTGGTAAGAAGGAATAATGATCA[A/G]AGTCAGAGGAAGTCAGGGAATATGTGACAATGGAAGAAGAGTCAGAGATGTGATGTTGCA       |
| 430 | ACTTCTAGGGTAATACAAAGTATACAGTACTCCCTCCACGTTTGGCAATATAGGTAGCA[A/T]GATTGTGAAGATACATCCATGGTAAGGAATCTCTTTCTGGGTTTGAAAATCTATCAAA         |
| 431 | ATTCTCTCTCCCACCCCTGAGGCCACTGCCAGGGAATAGGAGATGGGTGGCATCGGAAA[A/T]TCAAGACTGTCTTTACTACTCTCTTCAGTGTCTCTTTCAGCGATATGAAGTTAAAAAAC        |
| 432 | TTCTTCTCTTTCAACCACTAAAATGTCTCAGTGGCGTCTCTCTTTTGGCACACTTTGA[C/G]TAAGCTGTGCCAAAAGTGAATCCCTGGTGTCTGCCTTCTTTTGTCTCTGCTTTCCGT           |
| 433 | TAACATCTCTAGGTCTAAGATTTCTCAGCATACTCCCTTTTTTCCAGTTCAGGGAGGTGG[A/G]CTAGATGATTGTTGAGGTTTCCCTGGCCTTAAATGTATGCAATTATTGGTAATGAGATT       |
| 434 | TAATAGCAAAGGATATTCACGTTTGACTGTTAGTACACAATATCCTTTCTAAAGATAT[A/G]AAACCTCCTCCACCTTACCTTCATGTAAAAAATAAACCTCAGGCTACTTACA                |
| 435 | CAGCCCTACCGATGCCCTCCCTTCTCTGCCCCACTCCACCACCTTTCCATCTTACTGT[T/C]TGCTCAAAGTCTCCCTCAAATCCACTTCTCCATGAGAACTTTCACAGTTTTCTAAC            |
| 436 | ATCCTTTACCCTGTGTCTGAGACCAAT[T/C]ATAAAGTGACATACAGTTTTCTACCCATTAGGAAAAATAGTCATGGTGATTGTAGAAAAAC                                      |
| 437 | CCCAAAGTGCCTTTCCCTTTGTATATTATCATAAGTTGGCACTTTCTGAATAATCTTTGC[T/C]CTCTTCTACTTTGATGTCTCTATTCTGCATTCTCCTGCTTCTTCTCCCTGTTCCATGAA       |
| 438 | ACTAAATCATTTCTAAAATACTGGGATTTTTAGAGAATGCTGGTTAAACACAGAGGAGTG[A/G]ATACATGAGTCAATCTCTGCCCACTCTTAAACACCAAAATGATAGAGGAGAAATAAAAA       |
| 439 | ATGGCTGGGGGATTTGTTGCCAAGACACAGCTGGGTTTAAACTACATCTTTCCCTACACC[T/G]CATTGGCCAGAGTATGTTCTGTGAGCTATGTTTCTTGAACCTCAACTCTGGTCCCTCATA      |
| 440 | TTTGTTTTTGCTTCTGAGCCAGGGAGACATGCGTATCAGCAACAGAGGAATTTTTGAC[T/C]CTTCCCTGAGGATCCATTATTATCTGTGATGATGTGAAACAGAGACCATCAGTCCACAGA        |
| 441 | AGACACTTAGTGTGCTTATAAATCCAGATCAACACTTTTGCCACAGGTTAATAGTAAACA[A/T]TGAACCCAAAAACTCATAGTCCAAATATCAAACAGCTTTCCATTCCACTGAATACAAGA       |
| 442 | GAAACAAAAAAGAAACAAAAATCAGTAGAGGGAAGGAAAATAGAGAAATTCAGTCAGCA[A/T]ACTTAGGTTATGTTGACTCTTAGGTTTCATTCTAGGAACCAAAAAGACACACCAACCTT        |
| 443 | AGAGCCTTTCATTGAGATTAATTAATTACTGGAGTTAATTGGAACATTCAGGTTCCAATTT[G/C]CAGGTTACCATAAACCTGAAAATGTTTATCATGACTTTTATTCTGAAGTGAATGGT         |
| 444 | TTCCCTTGTTAAGAAAGTACATTTTTAACTTTAACAATGTATGTCTATGTGCTCACATG[T/C]TCTTTATGAATACAGTGTATTTAGGGGTTGTTTTGTTGTTTTAGTTTGAGAGGTGGTG         |
| 445 | TGATGCCGATGAGGAAAAGGCATCTGATTTAAGATTCATCGAAGGAAAACAGAATCCT[A/T]AGTATGATTACAAATATGCAAAAAGTCCACATAGGGGAAAAATGAAAAGACATACTACAA        |
| 446 | GTTAATGCTTTTGCCTTTAGCTGGTTTACCATCCTATACTTTTCACTTTGCTATCCACCA[A/C]AAAAATTTTTCCACACCCAGAAATGAAAATCTTGAGTTTAAAAAATAAAGACAGAAATTA      |
| 447 | AATCGTGCCATTGCACTCTAGCCTGGGCAACCAGTGTGAAACATCATCACCACCCACCC[C/C]AAAAAAGAATAGCTTGTCAAACAGAAATGAAGCACAGTCTATTTCTTTCAAACATAAA         |
| 448 | TCTTCTATGCTTCCACTGTGCCTTTCCAGACCTTGATCATATCCTTTTCCAGAAATGAAGGGA[T/C]TCAGTTTTTCCAAATGAAAATAACCTTAGAAAAGAAATGTGAAGGTGGGGGTAGAGAATTGT |
| 449 | CTAATAAGGAAGGAATCCTGCTCCTTTCTAATGTTTCCAAGTTAAGCTCCATCAGACCA[T/C]CTGGCAGTCATGGTACTTAGAGCATAAGAGGTGATTAATACCACCCTGGGATGTACTGAA       |
| 450 | GGTAGACTTTTTTCATGAGATGACATTCGTAATTTTCTCCAAGTTTAGTTTCCATTATGA[T/C]GAAAAGTTGCAAGGTTTTCACTGTCATGGAAGAATTAATAACTGTGACTTAAGCTTCACAA     |
| 451 | GCCTGGGCGACTGAGCGAGACTCCGCTTAAAAACAAAAACAAAAAAGAGCCATAGAT[T/G]ATCTCAGCAGGAAGAAGTTCTTGGGAGGAGTAGAGGCACAAGCTAGGCTGACAGGATTTG         |
| 452 | AAGTCTACAACTAAGATATATGAAAATTCATTCTTTGGTTTTATGATTTATTTTAGA[A/C]TCTATGGTTCAGTCTGATAATGGCCATATACTTCTCGATTGCAATTTTTTCAGACACT           |
| 453 | TTCAATTCCTCCTCCCTGGAAGTGAGCAGACTCAGCAGATCTGAGTTAAGTAGACAGACA[T/C]AGAAGCTGGTCTCAGCTGCTGAGTTTCTAAGGCTACCCCTGCAATCCTATAAAAATGTG       |
| 454 | AACACTTTCAGACAACCTTTCTAAATGTAATCAGCTCTGTATTGTGGTTAATCCAGGAT[T/G]CAATGTGCAGGTGGAGGTGGGCATTGTAAGGTATACAGCTCTGTCTTTAGGTCCAGCTT        |
| 455 | AAGATTGGAAGCCAACCTCTTGAGATTACCTAATGAAAACCTCCATTTATAGATAAGGGA[T/C]CTGAGACCCAGACTTATCCAAGTCCATTTCTGAGTAGATAATAAACTAGAATAATAACA       |
| 456 | TCTAATACAATATAGTAGAGCACAGGTAAAAATGGATCCCATGTAATGAAAACAATTAAC[A/G]AATCTACATAATCGGGCTATTTCTATCTCCTAGATAGCCACATTAATAGGCCACATTA        |
| 457 | AATGACTGAAAGGATTATTAACCTATGGTCAATTTACTGATGATTTATAACACACAATTTA[T/C]GGTGATTCAATTTTTTTCTGGATACCTATCTTTGAATATGCTATTTTTAAAAATTTTTT      |
| 458 | GGTTGCTTCATGAAGATTAATAAGTGAAGCTGTAACCATAACAAAAAGTACAAGGTAAGGC[A/C]TCAAGAACTGATGTAGAAGCTGCAGCAGGTTATCCAGAAGACATAGCTAAAAATAATTTAT    |
| 459 | TCTGGTACCAAAATTTGTTTAAAAAATGAAAAATACAATTTTAGCCTAAATAGTCATA[T/G]AAATGGGTCTGGAGTAATTTCTTTTCAAAAAATAGAAATATTGATAAACTTAATTATTA         |
| 460 | ATTTTGCATGCAGTTGCAGTATTTTCTGAAAGTCACAATAGTATCCCAATACCACGGTT[A/G]CAATAGTATCCCTGGCTCTCTCTGGTGAGCTACCACCTCATTTACCTTCCCACTGCCT         |
| 461 | ATTGACTTCTTCTTTTCTATTTTGTATGCTTTTTATTTTCTCTCTTGCCTGATTG[T/C]TCTGCTAGGACTTCCAGTGTCTATGTTAAATAGGAGTGGTGAGAGTGAGCGTACTTGTCT           |
| 462 | TCTTACAAAATAGAGATCAATCTCCAGCAAAAATACAAGGCTTCACTGTATAAACTAAATA[T/C]GTTACTTTATTCTTAAACGTTCTTTTCACTTCTACAATTTTAAACCTTTTCTGATTT        |
| 463 | AAAGGGTGCTGTTTAGGACACATAGTAGCAAAAATAAGGTAATCCATATTATATAGTGT[T/C]ACTTCTGACCACCTTCTGTAGTATGTTTGTGTAGCTTATTCTGTCTAGGCAACTGCCT         |

|     | A        | B         | C          | D                                       | E         | F     | G          | H             | I      | J      |
|-----|----------|-----------|------------|-----------------------------------------|-----------|-------|------------|---------------|--------|--------|
| 1   | Cytoband | Gene Name | Gene Alias | Description                             | Size (kb) | Chrom | SNP ID     | Position (bp) | htSNP* | Coding |
| 464 | 4q22.3   | GRID2     | GLURD2     | glutamate receptor, ionotropic, delta 2 | 1,467.8   | 4     | rs6844474  | 93573071      | T      |        |
| 465 | 4q22.3   | GRID2     | GLURD2     | glutamate receptor, ionotropic, delta 2 | 1,467.8   | 4     | rs7689616  | 93578476      | T      |        |
| 466 | 4q22.3   | GRID2     | GLURD2     | glutamate receptor, ionotropic, delta 2 | 1,467.8   | 4     | rs12647297 | 93621516      | T      |        |
| 467 | 4q22.3   | GRID2     | GLURD2     | glutamate receptor, ionotropic, delta 2 | 1,467.8   | 4     | rs6811045  | 93622702      | T      |        |
| 468 | 4q22.3   | GRID2     | GLURD2     | glutamate receptor, ionotropic, delta 2 | 1,467.8   | 4     | rs6532372  | 93628760      | T      |        |
| 469 | 4q22.3   | GRID2     | GLURD2     | glutamate receptor, ionotropic, delta 2 | 1,467.8   | 4     | rs7659338  | 93647438      | T      |        |
| 470 | 4q22.3   | GRID2     | GLURD2     | glutamate receptor, ionotropic, delta 2 | 1,467.8   | 4     | rs13435785 | 93658446      | T      |        |
| 471 | 4q22.3   | GRID2     | GLURD2     | glutamate receptor, ionotropic, delta 2 | 1,467.8   | 4     | rs4692973  | 93669372      | T      |        |
| 472 | 4q22.3   | GRID2     | GLURD2     | glutamate receptor, ionotropic, delta 2 | 1,467.8   | 4     | rs6815704  | 93693589      | T      |        |
| 473 | 4q22.3   | GRID2     | GLURD2     | glutamate receptor, ionotropic, delta 2 | 1,467.8   | 4     | rs1450500  | 93698298      | T      |        |
| 474 | 4q22.3   | GRID2     | GLURD2     | glutamate receptor, ionotropic, delta 2 | 1,467.8   | 4     | rs921354   | 93703741      | T      |        |
| 475 | 4q22.3   | GRID2     | GLURD2     | glutamate receptor, ionotropic, delta 2 | 1,467.8   | 4     | rs11934085 | 93734189      | T      |        |
| 476 | 4q22.3   | GRID2     | GLURD2     | glutamate receptor, ionotropic, delta 2 | 1,467.8   | 4     | rs7693534  | 93758663      | T      |        |
| 477 | 4q22.3   | GRID2     | GLURD2     | glutamate receptor, ionotropic, delta 2 | 1,467.8   | 4     | rs11734654 | 93788183      | T      |        |
| 478 | 4q22.3   | GRID2     | GLURD2     | glutamate receptor, ionotropic, delta 2 | 1,467.8   | 4     | rs7694867  | 93792419      | T      |        |
| 479 | 4q22.3   | GRID2     | GLURD2     | glutamate receptor, ionotropic, delta 2 | 1,467.8   | 4     | rs1479332  | 93809842      | T      |        |
| 480 | 4q22.3   | GRID2     | GLURD2     | glutamate receptor, ionotropic, delta 2 | 1,467.8   | 4     | rs7692227  | 93828960      | T      |        |
| 481 | 4q22.3   | GRID2     | GLURD2     | glutamate receptor, ionotropic, delta 2 | 1,467.8   | 4     | rs10516911 | 93838020      | T      |        |
| 482 | 4q22.3   | GRID2     | GLURD2     | glutamate receptor, ionotropic, delta 2 | 1,467.8   | 4     | rs2870642  | 93850739      | T      |        |
| 483 | 4q22.3   | GRID2     | GLURD2     | glutamate receptor, ionotropic, delta 2 | 1,467.8   | 4     | rs1434786  | 93859480      | T      |        |
| 484 | 4q22.3   | GRID2     | GLURD2     | glutamate receptor, ionotropic, delta 2 | 1,467.8   | 4     | rs6532381  | 93872361      | T      |        |
| 485 | 4q22.3   | GRID2     | GLURD2     | glutamate receptor, ionotropic, delta 2 | 1,467.8   | 4     | rs10516914 | 93879690      | T      |        |
| 486 | 4q22.3   | GRID2     | GLURD2     | glutamate receptor, ionotropic, delta 2 | 1,467.8   | 4     | rs10516916 | 93879981      | T      |        |
| 487 | 4q22.3   | GRID2     | GLURD2     | glutamate receptor, ionotropic, delta 2 | 1,467.8   | 4     | rs2217789  | 93895487      | T      |        |
| 488 | 4q22.3   | GRID2     | GLURD2     | glutamate receptor, ionotropic, delta 2 | 1,467.8   | 4     | rs11931529 | 93918392      | T      |        |
| 489 | 4q22.3   | GRID2     | GLURD2     | glutamate receptor, ionotropic, delta 2 | 1,467.8   | 4     | rs7671095  | 93926311      | T      |        |
| 490 | 4q22.3   | GRID2     | GLURD2     | glutamate receptor, ionotropic, delta 2 | 1,467.8   | 4     | rs1369169  | 93959432      | T      |        |
| 491 | 4q22.3   | GRID2     | GLURD2     | glutamate receptor, ionotropic, delta 2 | 1,467.8   | 4     | rs4235037  | 93973122      | T      |        |
| 492 | 4q22.3   | GRID2     | GLURD2     | glutamate receptor, ionotropic, delta 2 | 1,467.8   | 4     | rs1865431  | 93992250      | T      |        |
| 493 | 4q22.3   | GRID2     | GLURD2     | glutamate receptor, ionotropic, delta 2 | 1,467.8   | 4     | rs13147599 | 94003309      | T      |        |
| 494 | 4q22.3   | GRID2     | GLURD2     | glutamate receptor, ionotropic, delta 2 | 1,467.8   | 4     | rs6532382  | 94005798      | T      |        |
| 495 | 4q22.3   | GRID2     | GLURD2     | glutamate receptor, ionotropic, delta 2 | 1,467.8   | 4     | rs6818303  | 94041073      | T      |        |
| 496 | 4q22.3   | GRID2     | GLURD2     | glutamate receptor, ionotropic, delta 2 | 1,467.8   | 4     | rs1902436  | 94098316      | T      |        |
| 497 | 4q22.3   | GRID2     | GLURD2     | glutamate receptor, ionotropic, delta 2 | 1,467.8   | 4     | rs1378914  | 94117470      | T      |        |
| 498 | 4q22.3   | GRID2     | GLURD2     | glutamate receptor, ionotropic, delta 2 | 1,467.8   | 4     | rs729545   | 94120351      | T      |        |
| 499 | 4q22.3   | GRID2     | GLURD2     | glutamate receptor, ionotropic, delta 2 | 1,467.8   | 4     | rs12498874 | 94128750      | T      |        |
| 500 | 4q22.3   | GRID2     | GLURD2     | glutamate receptor, ionotropic, delta 2 | 1,467.8   | 4     | rs13142489 | 94135377      | T      |        |
| 501 | 4q22.3   | GRID2     | GLURD2     | glutamate receptor, ionotropic, delta 2 | 1,467.8   | 4     | rs1039938  | 94137366      | T      |        |
| 502 | 4q22.3   | GRID2     | GLURD2     | glutamate receptor, ionotropic, delta 2 | 1,467.8   | 4     | rs11945434 | 94159989      | T      |        |
| 503 | 4q22.3   | GRID2     | GLURD2     | glutamate receptor, ionotropic, delta 2 | 1,467.8   | 4     | rs1912718  | 94208915      | T      |        |
| 504 | 4q22.3   | GRID2     | GLURD2     | glutamate receptor, ionotropic, delta 2 | 1,467.8   | 4     | rs12506519 | 94233179      | T      |        |
| 505 | 4q22.3   | GRID2     | GLURD2     | glutamate receptor, ionotropic, delta 2 | 1,467.8   | 4     | rs10021148 | 94257587      | T      |        |

Key appears on page 109.

|     | K      | L      | M                       | N       | O       | P       | Q       |
|-----|--------|--------|-------------------------|---------|---------|---------|---------|
| 1   | Prom** | TFBS** | Association (reference) | MAF_CEU | MAF_YRI | MAF_JPT | MAF_HCB |
| 464 |        |        |                         | 0.09    | 0.29    | 0.11    | 0.16    |
| 465 |        |        |                         | 0.04    | 0.04    | 0.00    | 0.00    |
| 466 |        |        |                         | 0.18    | 0.01    | 0.09    | 0.07    |
| 467 |        |        |                         | 0.03    | 0.12    | 0.02    | 0.00    |
| 468 |        |        |                         | 0.00    | 0.10    | 0.00    | 0.00    |
| 469 |        |        |                         | 0.28    | 0.09    | 0.17    | 0.20    |
| 470 |        |        |                         | 0.01    | 0.00    | 0.00    | 0.00    |
| 471 |        |        |                         | 0.20    | 0.19    | 0.17    | 0.20    |
| 472 |        |        |                         | 0.14    | 0.45    | 0.13    | 0.21    |
| 473 |        |        |                         | 0.40    | 0.13    |         | 0.43    |
| 474 |        |        |                         | 0.33    | 0.48    | 0.34    | 0.47    |
| 475 |        |        |                         | 0.05    | 0.14    | 0.13    | 0.22    |
| 476 |        |        |                         | 0.28    | 0.34    | 0.33    | 0.41    |
| 477 |        |        |                         | 0.04    | 0.03    | 0.09    | 0.21    |
| 478 |        |        |                         | 0.24    | 0.20    | 0.24    | 0.22    |
| 479 |        |        |                         | 0.03    | 0.00    | 0.00    | 0.00    |
| 480 |        |        |                         | 0.21    | 0.33    | 0.28    | 0.41    |
| 481 |        |        |                         | 0.10    | 0.02    | 0.02    | 0.13    |
| 482 |        |        |                         | 0.11    | 0.00    | 0.24    | 0.22    |
| 483 |        |        |                         | 0.06    | 0.02    |         | 0.10    |
| 484 |        |        |                         | 0.20    | 0.16    |         | 0.44    |
| 485 |        |        |                         | 0.28    | 0.39    | 0.46    | 0.46    |
| 486 |        |        |                         | 0.07    | 0.03    | 0.00    | 0.00    |
| 487 |        |        |                         | 0.03    | 0.00    | 0.00    | 0.00    |
| 488 |        |        |                         | 0.06    | 0.14    | 0.16    | 0.11    |
| 489 |        |        |                         | 0.23    | 0.49    | 0.07    | 0.21    |
| 490 |        |        |                         | 0.48    | 0.16    | 0.47    | 0.46    |
| 491 |        |        |                         | 0.03    | 0.00    | 0.00    | 0.00    |
| 492 |        |        |                         | 0.34    | 0.12    | 0.49    | 0.42    |
| 493 |        |        |                         | 0.08    | 0.00    | 0.00    | 0.00    |
| 494 |        |        |                         | 0.34    | 0.45    | 0.46    | 0.39    |
| 495 |        |        |                         | 0.09    | 0.29    | 0.00    | 0.00    |
| 496 |        |        |                         | 0.01    | 0.07    | 0.31    | 0.17    |
| 497 |        |        |                         | 0.04    | 0.00    | 0.00    | 0.00    |
| 498 |        |        |                         | 0.01    | 0.03    | 0.04    | 0.07    |
| 499 |        |        |                         | 0.10    | 0.03    | 0.00    | 0.01    |
| 500 |        |        |                         | 0.13    | 0.00    | 0.00    | 0.00    |
| 501 |        |        |                         | 0.37    | 0.38    | 0.39    | 0.38    |
| 502 |        |        |                         | 0.06    | 0.19    | 0.00    | 0.00    |
| 503 |        |        |                         | 0.48    | 0.47    | 0.41    | 0.38    |
| 504 |        |        |                         | 0.42    | 0.31    | 0.42    | 0.34    |
| 505 |        |        |                         | 0.40    | 0.42    | 0.28    | 0.42    |

Key appears on page 109.



| 1   | A        | B         | C          | D                                       | E         | F     | G          | H             | I      | J      |
|-----|----------|-----------|------------|-----------------------------------------|-----------|-------|------------|---------------|--------|--------|
|     | Cytoband | Gene Name | Gene Alias | Description                             | Size (kb) | Chrom | SNP ID     | Position (bp) | htSNP* | Coding |
| 506 | 4q22.3   | GRID2     | GLURD2     | glutamate receptor, ionotropic, delta 2 | 1,467.8   | 4     | rs1354296  | 94294286      | T      |        |
| 507 | 4q22.3   | GRID2     | GLURD2     | glutamate receptor, ionotropic, delta 2 | 1,467.8   | 4     | rs1155646  | 94339397      | T      |        |
| 508 | 4q22.3   | GRID2     | GLURD2     | glutamate receptor, ionotropic, delta 2 | 1,467.8   | 4     | rs1875705  | 94361522      | T      |        |
| 509 | 4q22.3   | GRID2     | GLURD2     | glutamate receptor, ionotropic, delta 2 | 1,467.8   | 4     | rs7697616  | 94375370      | T      |        |
| 510 | 4q22.3   | GRID2     | GLURD2     | glutamate receptor, ionotropic, delta 2 | 1,467.8   | 4     | rs10516413 | 94425654      | T      |        |
| 511 | 4q22.3   | GRID2     | GLURD2     | glutamate receptor, ionotropic, delta 2 | 1,467.8   | 4     | rs4524351  | 94435453      | T      |        |
| 512 | 4q22.3   | GRID2     | GLURD2     | glutamate receptor, ionotropic, delta 2 | 1,467.8   | 4     | rs6854968  | 94452990      | T      |        |
| 513 | 4q22.3   | GRID2     | GLURD2     | glutamate receptor, ionotropic, delta 2 | 1,467.8   | 4     | rs3890316  | 94461921      | T      |        |
| 514 | 4q22.3   | GRID2     | GLURD2     | glutamate receptor, ionotropic, delta 2 | 1,467.8   | 4     | rs1433666  | 94471383      | T      |        |
| 515 | 4q22.3   | GRID2     | GLURD2     | glutamate receptor, ionotropic, delta 2 | 1,467.8   | 4     | rs2163959  | 94474279      | T      |        |
| 516 | 4q22.3   | GRID2     | GLURD2     | glutamate receptor, ionotropic, delta 2 | 1,467.8   | 4     | rs2870699  | 94492353      | T      |        |
| 517 | 4q22.3   | GRID2     | GLURD2     | glutamate receptor, ionotropic, delta 2 | 1,467.8   | 4     | rs1583337  | 94502359      | T      |        |
| 518 | 4q22.3   | GRID2     | GLURD2     | glutamate receptor, ionotropic, delta 2 | 1,467.8   | 4     | rs1948016  | 94531366      | T      |        |
| 519 | 4q22.3   | GRID2     | GLURD2     | glutamate receptor, ionotropic, delta 2 | 1,467.8   | 4     | rs1485012  | 94542392      | T      |        |
| 520 | 4q22.3   | GRID2     | GLURD2     | glutamate receptor, ionotropic, delta 2 | 1,467.8   | 4     | rs1948017  | 94553839      | T      |        |
| 521 | 4q22.3   | GRID2     | GLURD2     | glutamate receptor, ionotropic, delta 2 | 1,467.8   | 4     | rs1905733  | 94554163      | T      |        |
| 522 | 4q22.3   | GRID2     | GLURD2     | glutamate receptor, ionotropic, delta 2 | 1,467.8   | 4     | rs10516921 | 94596757      | T      |        |
| 523 | 4q22.3   | GRID2     | GLURD2     | glutamate receptor, ionotropic, delta 2 | 1,467.8   | 4     | rs1485015  | 94609228      | T      |        |
| 524 | 4q22.3   | GRID2     | GLURD2     | glutamate receptor, ionotropic, delta 2 | 1,467.8   | 4     | rs2200375  | 94610021      | T      |        |
| 525 | 4q22.3   | GRID2     | GLURD2     | glutamate receptor, ionotropic, delta 2 | 1,467.8   | 4     | rs4557232  | 94649460      | T      |        |
| 526 | 4q22.3   | GRID2     | GLURD2     | glutamate receptor, ionotropic, delta 2 | 1,467.8   | 4     | rs9307127  | 94653793      | T      |        |
| 527 | 4q22.3   | GRID2     | GLURD2     | glutamate receptor, ionotropic, delta 2 | 1,467.8   | 4     | rs4286488  | 94659049      | T      |        |
| 528 | 4q22.3   | GRID2     | GLURD2     | glutamate receptor, ionotropic, delta 2 | 1,467.8   | 4     | rs6841321  | 94663865      | T      |        |
| 529 | 4q22.3   | GRID2     | GLURD2     | glutamate receptor, ionotropic, delta 2 | 1,467.8   | 4     | rs1369465  | 94671971      | T      |        |
| 530 | 4q22.3   | GRID2     | GLURD2     | glutamate receptor, ionotropic, delta 2 | 1,467.8   | 4     | rs1369464  | 94681259      | T      |        |
| 531 | 4q22.3   | GRID2     | GLURD2     | glutamate receptor, ionotropic, delta 2 | 1,467.8   | 4     | rs9991666  | 94693931      | T      |        |
| 532 | 4q22.3   | GRID2     | GLURD2     | glutamate receptor, ionotropic, delta 2 | 1,467.8   | 4     | rs2196320  | 94722771      | T      |        |
| 533 | 4q22.3   | GRID2     | GLURD2     | glutamate receptor, ionotropic, delta 2 | 1,467.8   | 4     | rs1435475  | 94747783      | T      |        |
| 534 | 4q22.3   | GRID2     | GLURD2     | glutamate receptor, ionotropic, delta 2 | 1,467.8   | 4     | rs10516926 | 94756177      | T      |        |
| 535 | 4q22.3   | GRID2     | GLURD2     | glutamate receptor, ionotropic, delta 2 | 1,467.8   | 4     | rs1435476  | 94759989      | T      |        |
| 536 | 4q22.3   | GRID2     | GLURD2     | glutamate receptor, ionotropic, delta 2 | 1,467.8   | 4     | rs1435477  | 94762390      | T      |        |
| 537 | 4q22.3   | GRID2     | GLURD2     | glutamate receptor, ionotropic, delta 2 | 1,467.8   | 4     | rs10516930 | 94776709      | T      |        |
| 538 | 4q22.3   | GRID2     | GLURD2     | glutamate receptor, ionotropic, delta 2 | 1,467.8   | 4     | rs10516931 | 94778088      | T      |        |
| 539 | 4q22.3   | GRID2     | GLURD2     | glutamate receptor, ionotropic, delta 2 | 1,467.8   | 4     | rs10516933 | 94789431      | T      |        |
| 540 | 4q22.3   | GRID2     | GLURD2     | glutamate receptor, ionotropic, delta 2 | 1,467.8   | 4     | rs10516938 | 94793386      | T      |        |
| 541 | 4q22.3   | GRID2     | GLURD2     | glutamate receptor, ionotropic, delta 2 | 1,467.8   | 4     | rs10516940 | 94813222      | T      |        |
| 542 | 4q22.3   | GRID2     | GLURD2     | glutamate receptor, ionotropic, delta 2 | 1,467.8   | 4     | rs11946557 | 94816124      | T      |        |
| 543 | 4q22.3   | GRID2     | GLURD2     | glutamate receptor, ionotropic, delta 2 | 1,467.8   | 4     | rs1548037  | 94823482      | T      |        |
| 544 | 4q22.3   | GRID2     | GLURD2     | glutamate receptor, ionotropic, delta 2 | 1,467.8   | 4     | rs2196321  | 94832181      | T      |        |
| 545 | 4q22.3   | GRID2     | GLURD2     | glutamate receptor, ionotropic, delta 2 | 1,467.8   | 4     | rs10516941 | 94842434      | T      |        |
| 546 | 4q22.3   | GRID2     | GLURD2     | glutamate receptor, ionotropic, delta 2 | 1,467.8   | 4     | rs6850113  | 94853325      | T      |        |
| 547 | 4q22.3   | GRID2     | GLURD2     | glutamate receptor, ionotropic, delta 2 | 1,467.8   | 4     | rs1439543  | 94857136      | T      |        |

Key appears on page 109.

|     | K      | L      | M                       | N       | O       | P       | Q       |
|-----|--------|--------|-------------------------|---------|---------|---------|---------|
| 1   | Prom** | TFBS** | Association (reference) | MAF_CEU | MAF_YRI | MAF_JPT | MAF_HCB |
| 506 |        |        |                         | 0.45    | 0.23    | 0.24    | 0.34    |
| 507 |        |        |                         | 0.43    | 0.38    | 0.15    | 0.27    |
| 508 |        |        |                         | 0.46    | 0.28    | 0.46    | 0.39    |
| 509 |        |        |                         | 0.08    | 0.33    | 0.40    | 0.32    |
| 510 |        |        |                         | 0.40    | 0.21    | 0.15    | 0.39    |
| 511 |        |        |                         | 0.35    | 0.05    | 0.19    | 0.39    |
| 512 |        |        |                         | 0.34    | 0.43    | 0.42    | 0.46    |
| 513 |        |        |                         | 0.27    | 0.35    | 0.09    | 0.10    |
| 514 |        |        |                         | 0.44    | 0.28    | 0.33    | 0.36    |
| 515 |        |        |                         | 0.09    | 0.25    | 0.02    | 0.07    |
| 516 |        |        |                         | 0.42    | 0.23    | 0.35    | 0.32    |
| 517 |        |        |                         | 0.48    | 0.18    | 0.38    | 0.39    |
| 518 |        |        |                         | 0.35    | 0.38    | 0.40    | 0.35    |
| 519 |        |        |                         | 0.09    | 0.34    | 0.01    | 0.06    |
| 520 |        |        |                         | 0.10    | 0.37    | 0.01    | 0.06    |
| 521 |        |        |                         | 0.02    | 0.00    | 0.00    | 0.00    |
| 522 |        |        |                         | 0.02    | 0.11    | 0.00    | 0.00    |
| 523 |        |        |                         | 0.33    | 0.02    | 0.10    | 0.18    |
| 524 |        |        |                         | 0.20    | 0.16    |         | 0.41    |
| 525 |        |        |                         | 0.17    | 0.33    | 0.46    | 0.38    |
| 526 |        |        |                         | 0.28    | 0.01    | 0.08    | 0.19    |
| 527 |        |        |                         | 0.26    | 0.00    | 0.33    | 0.29    |
| 528 |        |        |                         | 0.28    | 0.08    | 0.00    | 0.00    |
| 529 |        |        |                         | 0.33    | 0.02    | 0.39    | 0.30    |
| 530 |        |        |                         | 0.04    | 0.42    | 0.00    | 0.03    |
| 531 |        |        |                         | 0.43    | 0.43    | 0.13    | 0.32    |
| 532 |        |        |                         | 0.23    | 0.00    | 0.05    | 0.19    |
| 533 |        |        |                         | 0.03    | 0.19    | 0.07    | 0.07    |
| 534 |        |        |                         | 0.27    | 0.33    | 0.00    | 0.01    |
| 535 |        |        |                         | 0.12    | 0.44    | 0.06    | 0.03    |
| 536 |        |        |                         | 0.46    | 0.26    | 0.35    | 0.33    |
| 537 |        |        |                         | 0.24    | 0.24    |         |         |
| 538 |        |        |                         | 0.11    | 0.00    | 0.00    | 0.00    |
| 539 |        |        |                         | 0.28    | 0.08    | 0.04    | 0.02    |
| 540 |        |        |                         | 0.12    | 0.11    | 0.07    | 0.03    |
| 541 |        |        |                         | 0.31    | 0.26    | 0.34    | 0.38    |
| 542 |        |        |                         | 0.01    | 0.07    | 0.00    | 0.00    |
| 543 |        |        |                         | 0.43    | 0.09    | 0.34    | 0.33    |
| 544 |        |        |                         | 0.50    |         | 0.26    | 0.26    |
| 545 |        |        |                         | 0.03    | 0.09    | 0.00    | 0.00    |
| 546 |        |        |                         | 0.33    | 0.18    | 0.22    | 0.20    |
| 547 |        |        |                         | 0.13    | 0.07    | 0.42    | 0.39    |

Key appears on page 109.

|     | R                                                                                                                                 |
|-----|-----------------------------------------------------------------------------------------------------------------------------------|
| 1   | Sequence                                                                                                                          |
| 506 | TATAGCAGCTATTCCTCCTATTAATTAATAAATTCTATTCCTTCATTGTTACCAACTGATTA[A/G]GGTACAAGTTTTAGGAAAATAATAATTGAACAAATTCACCCCTCAGGAGTAATGATACCAG  |
| 507 | TGAGAATAAAGATTTAAAAATCATTGCCAGTGTGAGAACCACTGTGTTACTGTCTTTAA[T/C]TCTCTGTGAGTTTTCTGCTGGCATTGGGGTTTTCTGGCGTTTTGCTGTGGTGATTTAAGG      |
| 508 | CATCACCAAATCCACACTCACCTCCTCTACATGACAAGCTTTCAATATTTGACACCAT[T/C]GTGGCTGCTTTGAGATATCTTTCTTTAGTTTTATCATCACCTGGTATCGTTCTAGGCT         |
| 509 | CTCAACCTCTGATTCTCTCTTTAATTTTTCTACTCTTTGCTCTCTATTTGATGTC[C/A/G]CTGGTATTTTATATCAAGTGGATGGATGaaattaaacaaatatttcatattttt              |
| 510 | TGTCAGCTATTTAGTATTGTTTCTAACATGTCAAATAGGACAGGCAAATATCTTAAGAC[A/T]TGGGATTTAAACAAGTACTTCTTGATATTTCTTATTTTTTAATGCACATGTTTTATTTTT      |
| 511 | GATTTAAAAATAAATCATGGAGTGAGTGAAATCGAGAAAAACGAGGTCCAAATGTGGAGTC[T/C]TGGATTTTCCAACATTAAGAGGTAAGAAATATGAAGATAAAAAGTACAGGAGACTGAAA     |
| 512 | TAATAAAAAAGCAAAAACAGAGCAAAGTGTTCATTAGTTCACACTACCCATGTTTCTGCA[T/C]TAAATCAGAGCGTTGTTAATATTTAAATATGCGTTTGAAGCCCAAGTGTATAGGGAGG       |
| 513 | acttctgggatattatctctaggttttctctcattCTAAATATCTTTAGAT[A/G]GAAGTGACAGATTCTTTCTATGCTTTTAGATATCAGAAATTTACATTTGTGATTAAGTCT              |
| 514 | ACAATTGTTTTGTGATTGTGCTATTTTCTCAGAGAGAAATATTCAAGGAACATAGTGT[T/C]TCTGGAGTCTCCAGAATGAAGTGAAAAGGGGAAGCAGAGGATATAATACTGGAGAGAT         |
| 515 | ACAAGCAACTTGGACTGGAATCAAAGTGACCTAGAAGAGCTACTTTCTACATCTTGTCTAT[C/G]AATCCCTAGGGCAAAGACATTATGTGGCAATATGTCCACATTAAGAAGATATATCCT       |
| 516 | TGACTTTGAAGCTTGCAGTCATTCTCTTGTGTATGCTATAATCCAAAGCCAGGCATTCT[T/C]ATCAGAGGGACAGGTGGAGATCATTGAATCATAATCAAGGTTTATTGTTGTAACCTTAA       |
| 517 | AGAAGCAACGATATAAAAAATACTCACTGAGGCACAGGCTCACAGGAAAATCTAGTAT[T/C]GAGAAAAGTTACAAATCTCTTTAGTGACCCAACACCTAACCTAAGCATAAGATTTCACT        |
| 518 | CTAGGGAACACATTTTACAAATTGAACCTATCTTGCAGGTGAAATACCATAAAGAAAAT[T/G]ATCATTGGAGAGATTACTGGCACACTGCATTCAATCACATGTCAAAGTGGAAAACATTCC      |
| 519 | AGTCTCCTCTATTTAATACACCTATGCTAAGAAGCTTTGGCACACACTGCAAAAAGCACT[C/G]AAGTTGCAGTCAAAGGTATGACTTTTAGTATCGTACTAGTTTTTCTGCTTAATTGATCT      |
| 520 | TAATCTTTAAAGCTTAAATTTTAAAAAGACAAGTTTAAACAGCAACCATTGAGGGTGAAT[T/C]ATTTATTGTTTTGCTCTTAAACATACCTTTGGGAATACAAATTAATAACAAGAAGT         |
| 521 | TGGAGGCATCAGTCTTTGGAAGAGTATTAACCTTCTGGGACTGTCTTACTGATTTTTAG[T/C]TGGAGTATGTGCATAATAATTCTATTAGATGAAGTAAAGCTTTCAATCAATAGACTAAA       |
| 522 | CAAGTAAGGAATGCAATAAATATTATTCTATTTGAAACAGTGAGAGCCAAATAATTAAT[T/C]GGACAAGTTAAAGAGTTGGGCAGATTGGATATTAATAACAGAGCAATGACATTCTTTA        |
| 523 | CTCCAAGATCTAGCCATAATGTTTTCTACTCTGCAGATCAGACACATATGGTTATCCATT[A/T]TGGAAACATGTTAACAAGTAAATCAAGAGATACGTCTCATTCCCAGCTGTATTTGTGGT      |
| 524 | ATTTAGTTTTTCAGAAACGTCATAATCTATACAATATTTGCAATAACTACAGGGGACC[A/G]GTTGCACTATTTCTGTGTCAACAGAAGATCTGACCTGTTTTCCGATAGCTTAGAGATT         |
| 525 | TCCAGGTAGAAAATAACAAGGCTATTAGACGTGGAAGGCAAAGATGGTGACAGATTTACA[A/G]AATTTAGGAGGTAAAATATACAGAAGTGGTATGAGAGTAGATGAGGTGGGGAAGTTAAAGA    |
| 526 | CAATGGTAGAATCCGTTCAATATTTAGAATTTCCAGAAAATCCAGAATCGCACTTT[C/G]TCTCAGATAGGATGATTTAAATGCATTATTTATGCAACAGATGTGTAGAGCAAAAAGG           |
| 527 | gtcagccagtacaaggccctgaggtagaagcatgctagatgtccaagaatgaagg[A/G]ggccagatgagtcagaataaaggataatcagaagtgcaacaaggtcaagaggtaa               |
| 528 | AAGATGAGTGTAGTTGGCAGGAGGGGTGAGCATATTGCCAGGTGCTTACTGAGGTGTGG[A/G]GCCCTCTTCATCCCTGACAGTGGCAGTGGAAAGCTTTGGCTAACAGCAATCTCACCAGCAG     |
| 529 | aatatgaaaaataaaaaataaTTCAGAATCAACCTTCTGAGTTAATAACAATGAACATAAT[A/G]TATTGTAATATGCAGAAAATAAATAATGCAATCTGTAATATGTATATATATATTGTAGTAATG |
| 530 | TACTTCAATTTCACTGAGTTAGGCTGTTTTCTCCATAGTGTCTCTCAACGACATTTTTCTT[C/G]AGTTAGGTAACAAAATCTCTGCGGCTGTCATATTTCTTTTTCATTTGGGTTTTGGGAACT    |
| 531 | AAGGAAGATTTGCTAAGGTTCTATATAAATTCACATTAATTTCTAACCTAGTACATTTCTT[C/G]AGAAAAGAAAATCGGAAATTAGTTTAGCATATATTTTCAAAACAGGAAGACTACTAA       |
| 532 | AGACGTTGCTTTAGTTTTACAGTTTTCTCAGGTTTATCAGAAAATAGAATGAGAAGTAGCG[A/T]TCATCTCAGACATTTGCCTAAAATAAATAAATTTCTGACACTTACAAAATGTATTTATC     |
| 533 | TTCTGGGAATGGAATTGCTGGACAAAAGACATCTATGATTTTTTAATTTGAATAGAT[A/G]TTGCTTTTGA AAAAGGCTATAACATTTTCTGTTTCCACTAGCAATATGTGAGAGTACAC        |
| 534 | CACTCAATGTATTTCCAAATTAGAGAAGGACATTTCTTGTCTCACACTTTGAAAATG[A/G]TTTTATGATAGTCCAACATTTTAGCCATTCATAGTCATCTTGTAGTCATATGTCTAAAGG        |
| 535 | TTTTTCTAAAAGCCCAATTTTTTTTACCTTAATACCGTGATCATATAGAAGTGGAA[A/G]CTGCATGCTTTCTGTGGCCCTTGGCGTAAACTACATAGCATTATATTTCTTTACGTAAGT         |
| 536 | GGAGCTATAAGCAGGTCTGCAAGTTGGTTGCAAAGATCAGAGAAAAGAAAGGAAACTATGG[A/G]ATAACTCTGTGGGTGAGAAATCAATGCAGACGAAACCTAACCAAGTGTTTTTCTTCTCT     |
| 537 | AATTATAAGACTCTCTCCAAAACCTTTTTATTCCCTTATAGTTAAATCACATTTTTAACA[T/C]TCAAAAACACTCATTCTACTCAACAAACATAACGTCAAGACACTTTTTACTGTTTGA AAAA   |
| 538 | TTGCCTCTTATCTATCCCATTTTCATAGTCTTTGAGCAGCTCAAATAAACTAACATCATA[A/G]TTGGTCAGACAGTCTACTCACATGTTAAACGTTTACTAATATGAAACAGAATCTGATACT     |
| 539 | TCCTTTGCTGTATAGAATCCTTCTTATTGATCAACTCATTCTCTAACTTGGCCTAAT[A/G]TCTCAAACAGTCTTTGCCTATAGGAAATCAACAACATGATGTTAACTAATGCATTGGGT         |
| 540 | ATACAGTGAAAATGGGGGAAAAAGTTTGGAAACGTAATTTGAGTTATAATAAAGGAAC[A/G]ATGTGAGAACAAGTTGTTAGAACAATCTCTGAGTCTCCTCCACGCTGTCACATTTCCAC        |
| 541 | TCTTTAAATAGCATAGAATACTATTTATCAGCGGTAGAACCAATTTAAATTAATTTTCTCAGC[T/C]CTGATGAGAAAATGGGAAGAGACTGAAGTACACTACACATTGGCATTGTACAGTTGGCAG  |
| 542 | TCCTAAGCAGAGTTGGAAACAATTTTACGCGTCACTGAAAGATAGCTTCCCTCAACTG[A/G]ATAATGTTAATGTTTATTGGCACTTAATAGCCTTAGACAGGACAGTATTTTGAAATTC AA      |
| 543 | TTACATCACAAGAGTCTGTGTTCTGGAAGAATAATGCACTGAATTTAATCATGATAATT[C/G]AGGCTTAGTATCTTTAAATACACATAGCAGATGCAAGGTTAAATGGCAGTTTTCAGTCTT      |
| 544 | tggtgtcactttttgactttttgacttcttgatttccatgattcctagaacaatact[A/G]agcatatgtaaaagtgttcaatgaatattgttgaatgaatgaatATGGTTAGGACTATT         |
| 545 | GGCTTTTTGTAATAGATTCCATACACCAAGAATGTCTAGATTTCAATGCATTCTGCATT[A/C]AGTCTTCTGTAAAACAAAATAATTGTTTTGCTTATTAATCATAACTTTGGATATCTGTTT      |
| 546 | TCAACTTATTAATAATTTGGGAAATCTTTCAAATAATTTAGATGTTAGACAATGAATTT[T/C]TAATGATTCTCAAGGATTACTTCTTTAAAGTTGGAACAGAATGTGTAATAATCTTTTCT       |
| 547 | TAGATCATTACTAAAAACGCATAGTCAGGTCAAAATAGAGCTGGAATCTTTTTACCTA[T/C]ATTTAAAAAGTATGCAGTGAAAAGTATTGAGGCTCAACTAGATAAAGAAGCTTTACAGAG       |

Complete list of all 94 genes and 1,536 SNPs present on the COGS SNP Chip

|     | A        | B         | C          | D                                                        | E         | F     | G          | H             | I      | J      |
|-----|----------|-----------|------------|----------------------------------------------------------|-----------|-------|------------|---------------|--------|--------|
| 1   | Cytoband | Gene Name | Gene Alias | Description                                              | Size (kb) | Chrom | SNP ID     | Position (bp) | htSNP* | Coding |
| 548 | 4q22.3   | GRID2     | GLURD2     | glutamate receptor, ionotropic, delta 2                  | 1,467.8   | 4     | rs4692990  | 94891726      | T      |        |
| 549 | 4q22.3   | GRID2     | GLURD2     | glutamate receptor, ionotropic, delta 2                  | 1,467.8   | 4     | rs10516943 | 94894653      | T      |        |
| 550 | 4q22.3   | GRID2     | GLURD2     | glutamate receptor, ionotropic, delta 2                  | 1,467.8   | 4     | rs7662498  | 94896866      | T      |        |
| 551 | 4q22.3   | GRID2     | GLURD2     | glutamate receptor, ionotropic, delta 2                  | 1,467.8   | 4     | rs13101891 | 94899563      | T      |        |
| 552 | 5p15.33  | SLC6A3    | DAT1       | solute carrier family 6, member 3 (dopamine transporter) | 52.6      | 5     | rs40184    | 1448077       | T      |        |
| 553 | 5p15.33  | SLC6A3    | DAT1       | solute carrier family 6, member 3 (dopamine transporter) | 52.6      | 5     | rs11564773 | 1449813       |        |        |
| 554 | 5p15.33  | SLC6A3    | DAT1       | solute carrier family 6, member 3 (dopamine transporter) | 52.6      | 5     | rs6869645  | 1457548       | T      |        |
| 555 | 5p15.33  | SLC6A3    | DAT1       | solute carrier family 6, member 3 (dopamine transporter) | 52.6      | 5     | rs6876225  | 1459036       |        |        |
| 556 | 5p15.33  | SLC6A3    | DAT1       | solute carrier family 6, member 3 (dopamine transporter) | 52.6      | 5     | rs2550936  | 1464256       |        |        |
| 557 | 5p15.33  | SLC6A3    | DAT1       | solute carrier family 6, member 3 (dopamine transporter) | 52.6      | 5     | rs6347     | 1464412       | T      |        |
| 558 | 5p15.33  | SLC6A3    | DAT1       | solute carrier family 6, member 3 (dopamine transporter) | 52.6      | 5     | rs11564759 | 1468291       |        |        |
| 559 | 5p15.33  | SLC6A3    | DAT1       | solute carrier family 6, member 3 (dopamine transporter) | 52.6      | 5     | rs37022    | 1468629       | T      |        |
| 560 | 5p15.33  | SLC6A3    | DAT1       | solute carrier family 6, member 3 (dopamine transporter) | 52.6      | 5     | rs11564758 | 1473588       |        |        |
| 561 | 5p15.33  | SLC6A3    | DAT1       | solute carrier family 6, member 3 (dopamine transporter) | 52.6      | 5     | rs463379   | 1484164       | T      |        |
| 562 | 5p15.33  | SLC6A3    | DAT1       | solute carrier family 6, member 3 (dopamine transporter) | 52.6      | 5     | rs403636   | 1491354       | T      |        |
| 563 | 5p15.33  | SLC6A3    | DAT1       | solute carrier family 6, member 3 (dopamine transporter) | 52.6      | 5     | rs2617605  | 1495521       | T      |        |
| 564 | 5p15.33  | SLC6A3    | DAT1       | solute carrier family 6, member 3 (dopamine transporter) | 52.6      | 5     | rs6350     | 1496199       | T      |        |
| 565 | 5p15.33  | SLC6A3    | DAT1       | solute carrier family 6, member 3 (dopamine transporter) | 52.6      | 5     | rs2963238  | 1497427       |        |        |
| 566 | 5q12.3   | HTR1A     | 5-HT1A     | 5-hydroxytryptamine (serotonin) receptor 1A              | 1.3       | 5     | rs1423691  | 63287418      |        |        |
| 567 | 5q31.1   | NEUROG1   | NEUROD3    | neurogenin 1                                             | 1.7       | 5     | rs2344485  | 134896540     | T      |        |
| 568 | 5q31.1   | NEUROG1   | NEUROD3    | neurogenin 1                                             | 1.7       | 5     | rs2344484  | 134904530     | T      |        |
| 569 | 5q32     | HTR4      | 5-HT4      | 5-hydroxytryptamine (serotonin) receptor 4               | 203.1     | 5     | rs1985524  | 147827981     | T      |        |
| 570 | 5q32     | HTR4      | 5-HT4      | 5-hydroxytryptamine (serotonin) receptor 4               | 203.1     | 5     | rs10062444 | 147834255     | T      |        |
| 571 | 5q32     | HTR4      | 5-HT4      | 5-hydroxytryptamine (serotonin) receptor 4               | 203.1     | 5     | rs2005953  | 147847332     | T      |        |
| 572 | 5q32     | HTR4      | 5-HT4      | 5-hydroxytryptamine (serotonin) receptor 4               | 203.1     | 5     | rs6865878  | 147891909     | T      |        |
| 573 | 5q32     | HTR4      | 5-HT4      | 5-hydroxytryptamine (serotonin) receptor 4               | 203.1     | 5     | rs1432917  | 147901079     | T      |        |
| 574 | 5q32     | HTR4      | 5-HT4      | 5-hydroxytryptamine (serotonin) receptor 4               | 203.1     | 5     | rs2278392  | 147908418     | T      |        |
| 575 | 5q32     | HTR4      | 5-HT4      | 5-hydroxytryptamine (serotonin) receptor 4               | 203.1     | 5     | rs7731872  | 147927154     | T      |        |
| 576 | 5q32     | HTR4      | 5-HT4      | 5-hydroxytryptamine (serotonin) receptor 4               | 203.1     | 5     | rs4599527  | 147932732     | T      |        |
| 577 | 5q32     | HTR4      | 5-HT4      | 5-hydroxytryptamine (serotonin) receptor 4               | 203.1     | 5     | rs4489051  | 147934678     | T      |        |
| 578 | 5q32     | HTR4      | 5-HT4      | 5-hydroxytryptamine (serotonin) receptor 4               | 203.1     | 5     | rs1833710  | 147947939     | T      |        |
| 579 | 5q32     | HTR4      | 5-HT4      | 5-hydroxytryptamine (serotonin) receptor 4               | 203.1     | 5     | rs4280857  | 147952812     | T      |        |
| 580 | 5q32     | HTR4      | 5-HT4      | 5-hydroxytryptamine (serotonin) receptor 4               | 203.1     | 5     | rs7711800  | 147963048     | T      |        |
| 581 | 5q32     | HTR4      | 5-HT4      | 5-hydroxytryptamine (serotonin) receptor 4               | 203.1     | 5     | rs1011427  | 147968170     | T      |        |
| 582 | 5q32     | HTR4      | 5-HT4      | 5-hydroxytryptamine (serotonin) receptor 4               | 203.1     | 5     | rs2068190  | 147987206     | T      |        |
| 583 | 5q32     | CAMK2A    |            | calcium/calmodulin-dependent protein kinase II alpha     | 70.3      | 5     | rs2241695  | 149583017     | T      |        |
| 584 | 5q32     | CAMK2A    |            | calcium/calmodulin-dependent protein kinase II alpha     | 70.3      | 5     | rs2053053  | 149589586     | T      |        |
| 585 | 5q32     | CAMK2A    |            | calcium/calmodulin-dependent protein kinase II alpha     | 70.3      | 5     | rs919741   | 149591881     | T      |        |
| 586 | 5q32     | CAMK2A    |            | calcium/calmodulin-dependent protein kinase II alpha     | 70.3      | 5     | rs3822607  | 149591986     | T      |        |
| 587 | 5q32     | CAMK2A    |            | calcium/calmodulin-dependent protein kinase II alpha     | 70.3      | 5     | rs3776825  | 149600864     | T      |        |
| 588 | 5q32     | CAMK2A    |            | calcium/calmodulin-dependent protein kinase II alpha     | 70.3      | 5     | rs7701427  | 149613148     | T      |        |
| 589 | 5q32     | CAMK2A    |            | calcium/calmodulin-dependent protein kinase II alpha     | 70.3      | 5     | rs2304042  | 149625000     | T      |        |

Key appears on page 109.



|     | K      | L      | M                                 | N       | O       | P       | Q       |
|-----|--------|--------|-----------------------------------|---------|---------|---------|---------|
| 1   | Prom** | TFBS** | Association (reference)           | MAF_CEU | MAF_YRI | MAF_JPT | MAF_HCB |
| 548 |        |        |                                   | 0.19    | 0.00    |         | 0.27    |
| 549 |        |        |                                   | 0.02    | 0.23    | 0.00    | 0.00    |
| 550 |        |        |                                   | 0.04    | 0.03    | 0.00    | 0.00    |
| 551 |        |        |                                   | 0.18    | 0.22    | 0.05    | 0.07    |
| 552 |        |        |                                   | 0.44    |         | 0.14    | 0.32    |
| 553 |        |        | haplotype (Greenwood et al. 2006) | 0.04    | 0.18    | 0.01    | 0.02    |
| 554 |        |        |                                   | 0.05    | 0.18    | 0.02    | 0.06    |
| 555 |        |        | haplotype (Greenwood et al. 2006) | 0.05    | 0.20    | 0.00    | 0.04    |
| 556 |        |        | haplotype (Greenwood et al. 2006) |         |         |         |         |
| 557 |        |        | haplotype (Greenwood et al. 2006) | 0.28    | 0.38    | 0.08    | 0.08    |
| 558 |        |        | haplotype (Greenwood et al. 2006) |         |         |         |         |
| 559 |        |        |                                   | 0.23    | 0.44    | 0.44    | 0.44    |
| 560 |        |        | haplotype (Greenwood et al. 2006) |         |         |         |         |
| 561 |        |        |                                   | 0.30    | 0.47    |         | 0.42    |
| 562 |        |        |                                   | 0.21    | 0.22    | 0.35    | 0.28    |
| 563 |        |        |                                   | 0.39    | 0.15    | 0.09    | 0.18    |
| 564 |        |        |                                   | 0.10    | 0.02    | 0.01    | 0.01    |
| 565 |        |        | haplotype (Greenwood et al. 2006) |         |         |         |         |
| 566 |        |        |                                   | 0.48    | 0.18    | 0.13    | 0.13    |
| 567 |        |        | haplotype (Fanous et al. 2007)    | 0.09    | 0.00    | 0.11    | 0.16    |
| 568 |        |        | p=0.017 (Fanous et al. 2007)      | 0.34    | 0.16    | 0.29    | 0.37    |
| 569 |        |        |                                   | 0.39    | 0.48    | 0.18    | 0.11    |
| 570 |        |        |                                   | 0.03    | 0.33    |         | 0.16    |
| 571 |        |        |                                   | 0.42    | 0.30    | 0.47    | 0.48    |
| 572 |        |        |                                   | 0.01    | 0.04    | 0.00    | 0.00    |
| 573 |        |        |                                   | 0.08    | 0.48    | 0.35    | 0.22    |
| 574 |        |        |                                   | 0.11    | 0.50    | 0.35    | 0.22    |
| 575 |        |        |                                   | 0.01    | 0.09    | 0.00    | 0.00    |
| 576 |        |        |                                   | 0.17    |         | 0.36    | 0.22    |
| 577 |        |        |                                   | 0.03    | 0.20    | 0.02    | 0.02    |
| 578 |        |        |                                   | 0.10    | 0.27    | 0.17    | 0.18    |
| 579 |        |        |                                   | 0.06    | 0.04    | 0.00    | 0.01    |
| 580 |        |        |                                   | 0.50    | 0.45    | 0.41    | 0.46    |
| 581 |        |        |                                   | 0.09    | 0.32    | 0.42    | 0.32    |
| 582 |        |        |                                   | 0.48    | 0.33    | 0.24    | 0.31    |
| 583 |        |        |                                   | 0.49    | 0.16    | 0.28    | 0.37    |
| 584 |        |        |                                   | 0.46    | 0.16    | 0.13    | 0.16    |
| 585 |        |        |                                   | 0.30    | 0.02    | 0.10    | 0.08    |
| 586 |        |        |                                   | 0.48    | 0.03    | 0.49    | 0.40    |
| 587 |        |        |                                   | 0.40    | 0.27    | 0.40    | 0.38    |
| 588 |        |        |                                   | 0.13    | 0.26    | 0.33    | 0.27    |
| 589 |        |        |                                   | 0.37    | 0.03    | 0.25    | 0.22    |

Key appears on page 109.

|     | R                                                                                                                              |
|-----|--------------------------------------------------------------------------------------------------------------------------------|
| 1   | Sequence                                                                                                                       |
| 548 | TGGTTCTTGGGGGAAATGCTCCTGTGGCATTATTGATTGCAGCCTTCATGAGAAGGACA[A/G]TGATTTACTGTGTTGCTTCTGTGCAGCTGTGAATTTGCTGTACAGTGACAGGGCCTTCC    |
| 549 | CACGTTACTTCTTTCTATGACAGTATGCCATTTGTTATATATGGAATGCCATTATTT[T/G]CAGTGATCTATATAGCTTGAGTTTTAAATCAGTATACTTTTATCAAACGGTATACCTTTT     |
| 550 | TGACTTACTTAACCTAATTACCCCCAAAGCCCTCATAAAATATCAATACAATGG[A/G]GCTTAGCGCTTCATCATATAAACTTTGGAGGGGCATAAACATTCAGTCCATAATAACATG        |
| 551 | CATATATTTCAAATTAAGGTTTCATTTTCTACCAAATAACATGTCTATAAAATATGATGG[T/G]TCTTAGAGCCAACAAAAATTTTCAAAAATTTGAACATAAAATGTTGTTCTAAATGTTAAA  |
| 552 | CCACCACGCCAACACAGTCTCGCGGCTTTTTAAAAAATCAAGTAATGATTGATTGTAG[A/G]AGTTTGTAGTGAGGCATCGGATCCCCGGCACCTGTCAAGGGTGTGTTGGTCCAGGCCCCCA   |
| 553 | GAATCATGACATTCTCCTGGCTGGGGAAACAGGCACCGTGCCAGCCCTGTGTTGGGCATC[A/G]GAGGTGTTCCCTCTGGTCTGTGCGCGGATCTCTCCCCAGCCTCCTCATTACAGCGGG     |
| 554 | GTGCATCCCTGGACATGTGCGGCTTGCCTATCTGACATGGAGGTATTGCTGTAATGTGCT[T/C]TCTGTTATTGTTCAACTTCTTGCTAGATACCACCTTTCTTAGAAAAGAACTATGCCTCCCC |
| 555 | CAGGCAGAGGTGAGTGGACAGCCGACTCACCTCCAGCTTCCCCTCCCAACACAGAGGCG[A/C]GGCCCAAGTGCAGGACTCACAACGGACTGTGACAGGGGTCCAAGACCATGTGAGGTTTTT   |
| 556 | AAGGTCTCCCAAATAATCACGGGGCTCGCCCAAGTCAAGGACAGGAGGTCTGGGGGCCGT[A/C]CGTGAGCCCAGGGATCTTGCCTAGCCCTGGGAGGGCAGGGCCCCCTCGGGTGAAGGAAAC  |
| 557 | AGGGCCAGGGCTGATCTTCATCATCTACCCGGAAGCCATCGCCACGCTCCCTCTGTCTC[A/G]GCCTGGGCCGTGGTCTTCTTCATCATGCTGCTCACCTGGGTATCGACAGCGCCGTGAGT    |
| 558 | CGCAGCACCAGCGCCCTTGGGAGTTCATGGGAAACAGCCCCGAGACCCCATGAGACC[T/C]GCCAGTCAGGATCTGCATCTTAGCGAGGTCCCCGGGAGGTGTGTGCTCCTAGAGCTTCT      |
| 559 | GTGCTTACTTTCTTTACATCATGAGGCTAGAAACACGGTAAAAATACAAGGACAGTGTG[A/T]GCAGCAGAATGGCCAGGCAGACCACAAGCAGGCTTCACTGAGAGTGGGCGCTGGAAGGCA   |
| 560 | GGGGCTCTGCATTCCAGGTTCCATATGCATTGCCTGCCAGGGCTGAGAGGTGCAGA[C/G]TTCAGACACCAGGGTCTTTCTCGGGAAGCCAAATCCAAGTACCTGTGATACAGCAC          |
| 561 | CGGACTCTTCGACTCAGCCGTCATTTTGGAGAGGAGGAGAGGACGTTTGCGCATTCTCC[C/G]CAGATCCAGTGTTCCTCGTACGCCAGGGCGCTCCTGTTGAGGGGCTCGCTTGCCTGGTT    |
| 562 | GAGGAGGGCTGCAAAGTGTGCCCGCAGGAAGGAAGGCTCGTGGCCCTGCGGGCGGATCTT[T/G]GGAAGAGCTTGTTCACACTCACCTAGTCTGCTGGTGAAGGAAAATTGCAAATCACAGAA   |
| 563 | TCCAGAACCCAGCCACAGAGCCAGAAAGCGAAGATCGAGGCAGGGCCACCGGGGACGTC[C/A/G]AGAACATTGGTGATCCCTTCCAGGAGCCTTTTGGGCTCCAGCCTCCCTGCCTGGCC     |
| 564 | TAAGGAGCCCAATGCCGTGGGCCGAAAGGAGGTGGAGCTCATCCTTGTCAAGGAGCAGAA[T/C]GGAGTGCAGCTCACAGCTCCACCCTCACCAACCCGCGGCAGAGCCCGTGGAGGCCAG     |
| 565 | TGTCTGTGTCTGTGTGTGCGTGCCTCGACTGAAACACGCTGCTGCTGGATCCAAATG[A/C]CAGAAGTCGCCCTGGCTGGGGCGGTGTAGACGCTCCTGCTCCTGCTCAGCGTTGCAGG       |
| 566 | ATATAAGTTTGAATTTTTGCTTGTACCTACCCCTGGCCACCCTGTTGCAACTCTTAA[T/C]GGTAAATGATTCTCTCCTCATTCTGATGCTCTCCTCCTTACTCTGCTCAAACTTTCTTC      |
| 567 | AAAATCTTTTTTTCCCACTGGATTCTTCTTTTCATGAATATAGTGAATTTGGTGGCAAG[C/G]GTACAGAGGAAGATGGGAATGGGTTTCAGGAAAATGTGTCTGAAACAAAAGCTGGTACAG   |
| 568 | ACCCAGGTTGAAGTGTCTGATAACCAGCAGAGAGGCTATTTGGCTCAACCTTGTCTT[T/C]ACAAAAGGGCTGGAAGGCTATGACTCTAACTCCAACGAGGACATACACATGGTCACTG       |
| 569 | CATGTCTACTGACCTCTTCTTTTGGTACATAAGCCCT[C/G]TCTTCTGGTTTTGAGTTTTCTAACACCTGCTGCCAGGCAGTTGGCTAACCAACCA                              |
| 570 | GCCATGTCAATTCAGGAATGAAATGACGTAACCCCTAATGACATCAATACGGAGAA[A/G]GACTAAATCGAAATTAATTTATCTGATCTCGACCAAGTTTTTAAAGTACAGATAATGTC       |
| 571 | CTGTGTGCGTAAGAATCAGCTGAGAGCAGTTTTTAAAAATGCAGATGCTGCTCTCTG[C/G]TCACTCTGCCCTCCTACCCTCGCTGCAAAAGGCTGGTATGGATCCTGGGAATCTGTA        |
| 572 | TGTCTCTGTATGCTATAACATGTCGTTATCTTTAAGAGTGGGGTCCACAAGGACA[C/G]CACTATGTTCTGGTGATCCTATATGGACCAAAAACCACTGCATTGCCCTCCACTTTGCT        |
| 573 | TATTCGTGTGTTTTCTTTGGAACATAAATAGCTGTTCCATGCATGTTTGGCTGAGCAG[A/T]GAATGCTGAGATGTGACTTGTGGTTGTTTGTATGACGCTGGGTTGGTTTTCTGTCTCCTC    |
| 574 | ACGTCCTGCTCACAACGGCATCGATTTTTACCTGTGCTGCATTTCTCTGGATAGGTAAG[A/G]ACAGAACAATGTGCATAGCGGAGCTCCATGCTGGAGACATGACTTGATGGATATTGGGCA   |
| 575 | TCTTACAAGTTTTATTCTTGCAATAAAATCTTGTCTTCAATTTCTGCCCTTATAGTCTA[T/C]GTGCTACACAAAATCTAGAGTTATACCTTGAAATCAAAGGCAGACAATGTATGTTTTCC    |
| 576 | AATTGTATGGATAATGATAATCCAGTGATACTAAAACATATCTAGACAATTAACCAGAA[T/C]AATGAAGGTTTGAATTTTCCCTGTGGCACAGGTAGAGCAGCTGAGGAAATGGAGATCT     |
| 577 | CATAAAATAATTTCTCTGGTTTCTGCTGCTAAAATGCTCTTATAGTGGAGCTTATAATA[A/T]CCCAAGAGGAAGCAAGCATGATAGGATAACTAATGAGTTTTCCACATAAGAGTCAACCTC   |
| 578 | TCAACAATGCAAGTGTGCAGAGATTAATGAGACCAGTGTGAGAAAAGTCTATCGGTC[T/C]TGAACCACAGAGCTGACTGATGGTTCAGCAGGGGAGACTCAGCTGGTTGGTGGCAGAGC      |
| 579 | TCATGGCTGTCTTATGGTTTCAATTTATTCTATTGTTTATTAATTTAAACAATTATGTT[A/G]TAATCTCTCAAAGTGGTATGCAATCTGAAGTACTTATAGTTAAATTTTTCTGCTTTTGG    |
| 580 | GTTAGTTTAAACAATATAAATCAATGCAATTTCCATGTTAATAAAGGAGAATATTCATA[T/C]CACCACTCAAAAAAGCATTGAAAAATGTTATAATTACGATTTACAAAGAAAAACT        |
| 581 | ATTTTAGAGAAGCAGCTAATCTAGGCTTTGGTGGTCCACAAAAGCTTCTGAGAGATTGTG[T/C]CATAACTAGCCAAATGAAGTGGTGAAGAAGAATGCTCTCAGTAGCAAGAGAATGCCATT   |
| 582 | ACTTTCTCTATCAACAGTGAACCTGACGTTTCTAGCCTCACCTTATCTCAAATGCCACCA[T/C]GTTTCAATTGATGTAATTAAGTGCAGTTCAAATCCTCAAAGATGAATGCCAGAAAAAGCG  |
| 583 | GCTGTTCCGGGACCACACTGGAGGAGGGGATGGGAGGGGCAGAGGAGATGCAACCGGGG[T/C]CTCCTGTCTACTTTTCTCACTTTTCTCACTCCCAGCAGCCCTTCAATGGAGGCGCCCT     |
| 584 | GCATGCATTTGTACACATGTGTGCACGTTTAAACTGTGCACAAGGAGGGTCCGACGGT[T/C]GTGTGCATGTATACCTGAGTGTTCATAAAAGCATGGAAATAGGCTGTTAAGCTGGTC       |
| 585 | TCTGTCTAAGCTGAAGCTTGGATTCTGCTCACTATGTAATTTGGCTTTGAATGAATGAGAG[A/G]TGGTGGTGTCTCATTTTACAGATGGGAAAAGTGGAGCTCAGAACATCACACATCTAATA  |
| 586 | AAACAACCTCGGAGAACACTATCATCTCCATTTACAGACCTTCAAACCACCTTGTGGCC[T/C]GCAGTTGCACAGCTTGGAGCTGGACAGTCAATTTAAATAAACATCTGTCTAAGCTGAAG    |
| 587 | CCTTCTGTGGAGGCCCGGATGGAAGGCACAGGGCCTTGAAGTCAAAGGCCACTCCTGGC[T/C]CAACCATCACTTTGTAGCTCAGCCTCCTTCACTCCCTTGGATGGAGGAGGGAAGAAGTCC   |
| 588 | GGCCCAACAGCATCTCCAGCCATACCACTCAGGCAGGGGTTCCAGAGGCTTATGTG[T/C]AACACAAATGGGTGCTGACCCCAACACTTCTGCCAGCCCACCCACTTACCAAACCATG        |
| 589 | GCAGTGGAAAAGGAAGAGGCCTGGTTGCAGTGAACACATCCCTCGCCCTCT[C/A/G]GCCTCCGTTTCCATGATTCTTAAATGTGAGGCTTCTCCGAGACTCCTCCAGCCTGTTCC          |

Complete list of all 94 genes and 1,536 SNPs present on the COGS SNP Chip

| 1   | A        | B         | C          | D                                                    | E         | F     | G          | H             | I      | J      |
|-----|----------|-----------|------------|------------------------------------------------------|-----------|-------|------------|---------------|--------|--------|
|     | Cytoband | Gene Name | Gene Alias | Description                                          | Size (kb) | Chrom | SNP ID     | Position (bp) | htSNP* | Coding |
| 590 | 5q32     | CAMK2A    |            | calcium/calmodulin-dependent protein kinase II alpha | 70.3      | 5     | rs959059   | 149630732     | T      |        |
| 591 | 5q32     | CAMK2A    |            | calcium/calmodulin-dependent protein kinase II alpha | 70.3      | 5     | rs874084   | 149631023     | T      |        |
| 592 | 5q32     | CAMK2A    |            | calcium/calmodulin-dependent protein kinase II alpha | 70.3      | 5     | rs3797616  | 149633197     | T      |        |
| 593 | 5q32     | CAMK2A    |            | calcium/calmodulin-dependent protein kinase II alpha | 70.3      | 5     | rs1897559  | 149636405     | T      |        |
| 594 | 5q32     | CAMK2A    |            | calcium/calmodulin-dependent protein kinase II alpha | 70.3      | 5     | rs10515639 | 149636619     | T      |        |
| 595 | 5q32     | CAMK2A    |            | calcium/calmodulin-dependent protein kinase II alpha | 70.3      | 5     | rs1432833  | 149641346     | T      |        |
| 596 | 5q32     | CAMK2A    |            | calcium/calmodulin-dependent protein kinase II alpha | 70.3      | 5     | rs3806947  | 149651516     | T      |        |
| 597 | 5q32     | CAMK2A    |            | calcium/calmodulin-dependent protein kinase II alpha | 70.3      | 5     | rs1432832  | 149653734     | T      |        |
| 598 | 5q34     | GABRB2    |            | gamma-aminobutyric acid (GABA) A receptor, beta 2    | 254.3     | 5     | rs592403   | 160652562     | T      |        |
| 599 | 5q34     | GABRB2    |            | gamma-aminobutyric acid (GABA) A receptor, beta 2    | 254.3     | 5     | rs3850733  | 160670895     | T      |        |
| 600 | 5q34     | GABRB2    |            | gamma-aminobutyric acid (GABA) A receptor, beta 2    | 254.3     | 5     | rs153296   | 160673511     | T      |        |
| 601 | 5q34     | GABRB2    |            | gamma-aminobutyric acid (GABA) A receptor, beta 2    | 254.3     | 5     | rs10515827 | 160687535     | T      |        |
| 602 | 5q34     | GABRB2    |            | gamma-aminobutyric acid (GABA) A receptor, beta 2    | 254.3     | 5     | rs252942   | 160688459     | T      |        |
| 603 | 5q34     | GABRB2    |            | gamma-aminobutyric acid (GABA) A receptor, beta 2    | 254.3     | 5     | rs187269   | 160689203     |        |        |
| 604 | 5q34     | GABRB2    |            | gamma-aminobutyric acid (GABA) A receptor, beta 2    | 254.3     | 5     | rs252944   | 160690915     |        |        |
| 605 | 5q34     | GABRB2    |            | gamma-aminobutyric acid (GABA) A receptor, beta 2    | 254.3     | 5     | rs194072   | 160691233     |        |        |
| 606 | 5q34     | GABRB2    |            | gamma-aminobutyric acid (GABA) A receptor, beta 2    | 254.3     | 5     | rs1816072  | 160692234     |        |        |
| 607 | 5q34     | GABRB2    |            | gamma-aminobutyric acid (GABA) A receptor, beta 2    | 254.3     | 5     | rs1816071  | 160692534     |        |        |
| 608 | 5q34     | GABRB2    |            | gamma-aminobutyric acid (GABA) A receptor, beta 2    | 254.3     | 5     | rs967771   | 160694752     | T      |        |
| 609 | 5q34     | GABRB2    |            | gamma-aminobutyric acid (GABA) A receptor, beta 2    | 254.3     | 5     | rs2910298  | 160724310     | T      |        |
| 610 | 5q34     | GABRB2    |            | gamma-aminobutyric acid (GABA) A receptor, beta 2    | 254.3     | 5     | rs1422951  | 160766838     | T      |        |
| 611 | 5q34     | GABRB2    |            | gamma-aminobutyric acid (GABA) A receptor, beta 2    | 254.3     | 5     | rs10043074 | 160780542     | T      |        |
| 612 | 5q34     | GABRB2    |            | gamma-aminobutyric acid (GABA) A receptor, beta 2    | 254.3     | 5     | rs4498288  | 160807099     | T      |        |
| 613 | 5q34     | GABRB2    |            | gamma-aminobutyric acid (GABA) A receptor, beta 2    | 254.3     | 5     | rs2962420  | 160822562     | T      |        |
| 614 | 5q34     | GABRB2    |            | gamma-aminobutyric acid (GABA) A receptor, beta 2    | 254.3     | 5     | rs7724146  | 160827209     | T      |        |
| 615 | 5q34     | GABRB2    |            | gamma-aminobutyric acid (GABA) A receptor, beta 2    | 254.3     | 5     | rs2962406  | 160842679     | T      |        |
| 616 | 5q34     | GABRB2    |            | gamma-aminobutyric acid (GABA) A receptor, beta 2    | 254.3     | 5     | rs2962402  | 160870827     | T      |        |
| 617 | 5q34     | GABRB2    |            | gamma-aminobutyric acid (GABA) A receptor, beta 2    | 254.3     | 5     | rs6882041  | 160874978     | T      |        |
| 618 | 5q34     | GABRB2    |            | gamma-aminobutyric acid (GABA) A receptor, beta 2    | 254.3     | 5     | rs4426954  | 160885609     | T      |        |
| 619 | 5q35.2   | DRD1      |            | dopamine receptor D1                                 | 3.5       | 5     | rs5326     | 174802802     | T      |        |
| 620 | 6p24.3   | MUTED     |            | muted homolog                                        | 183.2     | 6     | rs2815132  | 7974944       | T      |        |
| 621 | 6p24.3   | MUTED     |            | muted homolog                                        | 183.2     | 6     | rs9379157  | 7993105       | T      |        |
| 622 | 6p24.3   | MUTED     |            | muted homolog                                        | 183.2     | 6     | rs2294435  | 8002919       | T      |        |
| 623 | 6p24.3   | MUTED     |            | muted homolog                                        | 183.2     | 6     | rs2815155  | 8010229       | T      |        |
| 624 | 6p24.3   | MUTED     |            | muted homolog                                        | 183.2     | 6     | rs2326975  | 8014321       | T      |        |
| 625 | 6p22.3   | DTNBP1    | Dysbindin  | dystrobrevin binding protein 1                       | 140.2     | 6     | rs1047631  | 15631080      | T      |        |
| 626 | 6p22.3   | DTNBP1    | Dysbindin  | dystrobrevin binding protein 1                       | 140.2     | 6     | rs742106   | 15632459      | T      |        |
| 627 | 6p22.3   | DTNBP1    | Dysbindin  | dystrobrevin binding protein 1                       | 140.2     | 6     | rs875462   | 15646415      | T      |        |
| 628 | 6p22.3   | DTNBP1    | Dysbindin  | dystrobrevin binding protein 1                       | 140.2     | 6     | rs1040410  | 15655455      | T      |        |
| 629 | 6p22.3   | DTNBP1    | Dysbindin  | dystrobrevin binding protein 1                       | 140.2     | 6     | rs7771339  | 15677985      | T      |        |
| 630 | 6p22.3   | DTNBP1    | Dysbindin  | dystrobrevin binding protein 1                       | 140.2     | 6     | rs760666   | 15697100      |        |        |
| 631 | 6p22.3   | DTNBP1    | Dysbindin  | dystrobrevin binding protein 1                       | 140.2     | 6     | rs2619539  | 15728834      |        |        |

Key appears on page 109.

|     | K      | L      | M                                                                             | N       | O       | P       | Q       |
|-----|--------|--------|-------------------------------------------------------------------------------|---------|---------|---------|---------|
| 1   | Prom** | TFBS** | Association (reference)                                                       | MAF_CEU | MAF_YRI | MAF_JPT | MAF_HCB |
| 590 |        |        |                                                                               | 0.03    | 0.38    | 0.00    | 0.00    |
| 591 |        |        |                                                                               | 0.18    | 0.47    | 0.37    | 0.27    |
| 592 |        |        |                                                                               | 0.02    | 0.00    | 0.07    | 0.04    |
| 593 |        |        |                                                                               | 0.13    | 0.01    | 0.04    | 0.01    |
| 594 |        |        |                                                                               | 0.19    | 0.33    | 0.35    | 0.34    |
| 595 |        |        |                                                                               | 0.14    | 0.45    |         | 0.44    |
| 596 |        |        |                                                                               | 0.04    | 0.24    | 0.10    | 0.20    |
| 597 |        |        |                                                                               | 0.33    | 0.23    | 0.28    | 0.20    |
| 598 |        |        |                                                                               | 0.30    |         |         |         |
| 599 |        |        |                                                                               | 0.08    | 0.30    | 0.13    | 0.08    |
| 600 |        |        |                                                                               | 0.24    | 0.00    | 0.23    | 0.16    |
| 601 |        | Y      |                                                                               | 0.19    | 0.00    | 0.00    | 0.00    |
| 602 |        |        |                                                                               | 0.29    | 0.37    | 0.23    | 0.26    |
| 603 |        |        | p=0.0009 (Lo et al. 2004)                                                     | 0.29    | 0.37    |         | 0.17    |
| 604 |        |        | p=0.0003 (Lo et al. 2004)                                                     | 0.10    | 0.13    |         | 0.13    |
| 605 |        |        | p=0.0005 (Lo et al. 2004)                                                     | 0.12    | 0.14    | 0.18    | 0.22    |
| 606 |        |        | p=0.006 (Lo et al. 2007), p=0.027 (Lo et al. 2004), p=0.047 (Yu et al. 2006)  |         |         |         |         |
| 607 |        |        | p=0.0008 (Lo et al. 2004), p=0.005 (Lo et al. 2007), p=0.045 (Yu et al. 2006) |         |         |         |         |
| 608 |        |        |                                                                               | 0.24    | 0.00    | 0.06    | 0.18    |
| 609 |        |        |                                                                               | 0.13    | 0.00    | 0.06    | 0.02    |
| 610 |        |        |                                                                               | 0.28    | 0.41    | 0.36    | 0.21    |
| 611 |        |        |                                                                               | 0.15    | 0.42    | 0.28    | 0.20    |
| 612 |        |        |                                                                               | 0.01    | 0.00    | 0.00    | 0.00    |
| 613 |        |        |                                                                               | 0.37    | 0.29    | 0.50    | 0.46    |
| 614 |        |        |                                                                               | 0.18    | 0.08    | 0.23    | 0.14    |
| 615 |        |        |                                                                               | 0.26    | 0.31    | 0.44    | 0.30    |
| 616 |        |        |                                                                               | 0.01    | 0.00    | 0.12    | 0.09    |
| 617 |        |        |                                                                               | 0.31    | 0.25    | 0.44    | 0.28    |
| 618 |        |        |                                                                               | 0.41    | 0.18    | 0.39    | 0.46    |
| 619 |        |        |                                                                               | 0.13    | 0.18    | 0.24    | 0.24    |
| 620 |        |        |                                                                               | 0.48    | 0.18    | 0.24    | 0.24    |
| 621 |        |        |                                                                               | 0.04    | 0.03    | 0.10    | 0.21    |
| 622 |        |        |                                                                               | 0.18    | 0.16    | 0.16    | 0.17    |
| 623 |        |        |                                                                               | 0.46    | 0.15    | 0.23    | 0.18    |
| 624 |        |        |                                                                               | 0.06    | 0.17    | 0.23    | 0.20    |
| 625 |        |        |                                                                               | 0.20    | 0.17    | 0.00    | 0.02    |
| 626 |        |        |                                                                               | 0.34    | 0.16    | 0.44    | 0.38    |
| 627 |        |        |                                                                               | 0.20    |         | 0.00    | 0.00    |
| 628 |        |        | haplotype (Fallin et al. 2005)                                                | 0.08    | 0.23    | 0.09    | 0.07    |
| 629 |        |        |                                                                               | 0.03    | 0.00    | 0.00    | 0.00    |
| 630 |        |        | haplotype (Fallin et al. 2005; Straub et al. 2002)                            | 0.20    | 0.12    |         | 0.00    |
| 631 |        |        | p=0.006 (Straub et al. 2002), haplotype (Li et al. 2005)                      | 0.47    | 0.28    | 0.36    | 0.34    |

Key appears on page 109.

|     | R                                                                                                                                 |
|-----|-----------------------------------------------------------------------------------------------------------------------------------|
| 1   | Sequence                                                                                                                          |
| 590 | TTGCCCCAGTGGGAGAGAGGGTCCAGGCACCAAGGTGGTCCCTGGATGCTGGGGATCTCGG[A/G]TTAGTTCACCACACTCTCGAGGCACATTACACACACACTTGACAGTTGACCAAAGAGA      |
| 591 | CAGCAGAGGGGGTGGCTGGGGTTAGGGTGAGGGTCTCTGAAGGACCAGGAGCCACCGT[C/G]TATACAGTCAGTATGAAAAGTCCAAGCTTGTGGAAGGCTGGGAAGTACAGACAGGGTGGG       |
| 592 | CTACTCAAAGTAAAAATCTAAAAATGTTCCAGAGACTGGATCCACGGTCTAACACTA[T/C]GTGATTCTAATGTTTTACAGCATGATGAGCCGACTTTGATGACGTTGGCAGGCTCCTCT         |
| 593 | TCCTGCACCCTGGAGCTCACAACCTTCCCTGCTTCCCTGCTTCTTCCCTGGAGTTCTC[A/G]GAACCTTGCCAGATGTGGCCACTTTAAGCTTCTTTCTCATAGGGCTTTTGAAGTATCATG       |
| 594 | GGGATGGTTGGACGGGGGAGGGAGGGATGAGTATAATTTCTCCATTAGAGAGGCAAAACT[T/C]CATTCTAGGTAAGACCTTAGATCAGTGATTATCAAATTGGCTGCCTCAGAATCCCCTGG      |
| 595 | ATGGACCTCAAGGTCGGACCCCTCTAACCTGAGAGTACTGGGTATTGAAAAAGCAATG[A/G]CTATGAATCAGCAGTCTGGGTTCAAAGCTTGGCCCCAGTTTCTCAGCTTTGGAATAG          |
| 596 | GAGGGTTATCCAGATGTCTCCAGGGGGCCCTGCAAGTAGGGTAGTGAGTCAGGGACTTC[A/G]TGGGGTTGGAGAATACCAACAAGCAGATAACATGTCTGCAAGTGAGAGGACTAGCAAGG       |
| 597 | GGCCCTGCAGGACCCTGGGGCACTTGGGCATATGTGTGGGCTGTGGAAGGTGGGATTT[C/G]AGTCAGCTGTCACAATGCCACTGGGGCTACAATCACCCATGCAGGAACCCAGCCCTGGTC       |
| 598 | TTGTTTTCTCAGACGAAGTCAGCTGTCCCTGCAATTTTTGTCCCTATAATTTTTATTCT[T/G]AATTTAATAGAGTATTTCAAGAGAAGGATTTGTTTCATCACTTTAAAGGATTCATGGTCT      |
| 599 | GAGCTTTTCAGAGACTTAGCTAGGCTGAGTAACCCCTGGCTTCTTGAATTCAAATTGGATT[A/C]JATGGCTGCCAATAATAGAAGTGAAGAAAGATTTTTAAAAACAGCTTCACACGCAATCTG    |
| 600 | TCACAAAGTTTGGGAGGCACATCACCATGTGTTGATCAGCAAATATTTATTAACCTAAT[C/G]CTCTTGGAGACCAAGCCAACAGTTAAGAGCACGGGCAGTCTGAACATAATCAAACCTAC       |
| 601 | GGGACATTCTGATAAGAAATGGGGTGGTATTATTCATGATGCTGACACAAAGGACAGCA[T/C]CGCATAATCAGGAGCAATGTGGACCTCCTAACCTTTTCATGCTGGGTGAACAAAGAAAT       |
| 602 | TCCTATAGTTTTTACAATGAAAGATGTCTCCAGACAATGCCTAATGTCTCTGGGAGAAG[A/G]AAATGACCCTGTTTTGAGAACCCTGAAAAATACTAAATAATCTCTGGTATCTTTTTGT        |
| 603 | TGAGTTAGAAGCTCCATATGGTTTGTCCAAATACAACCTCAATGGCAGAGATTATTTAT[A/G]CTTTGCTATCCTTGAATTAATTTGAAGTTAGAAATATCAAACATCAAGGAAATAATCA        |
| 604 | CCTAGGATAGGGAATGGATATAGGTATAAATTAGCTTACAGTGATCACTGAACGTTTGTAT[C/G]CCTTCTTTAATTAATTTTTGTATTTATAGTTATATATCTAGTGCAGGGTTAAAACGTG      |
| 605 | GTGGAGAGAGCTTTTATATCAAGGTTGGATTTGGGGGAGAGTACACAGTCCATTACCATG[A/G]TCTCGAAAAATCATTGTGGGTACATTGCAAGACAGGATGGGAAGAATCGTGAGAAGACT      |
| 606 | ATAGTGTAAAGGGCCTGGATTCCCTGAGTCAGAAAGATTCTCATTCCAATGGCAACTCTA[T/C]AACTTTCCATCTGTGTGATCTTGACCTCTGAGCTTTGTCTATTTTACATCACTATTTTG      |
| 607 | GATCATCCGTAGTTGAAATGATGAAGAGAAAAATTGAAACTGGAAAAATGTCTCAAAATGAC[A/G]GCTATAAAGAGGACACGAGAAATGTAAGTACCTGTATCTAAAGCAAGACCAAGGTTTTA    |
| 608 | GAACAATTGAAAGAATGAAAAAAGAAGTGTCCCAAAATGTCCCTAACAAATTACAGAGGAG[A/G]GGTATGTTTGATTCACTCTATGAGGCTGAGTAGGGAAAGAGCTGGAATTC              |
| 609 | TGGCTTATGGCATGTAATAATTACAGTGAAGTACTAGAAATGGTACTTCTTTAGGTTAAGTGGCT[A/T]ATTATCAGTCAGCCAGAAGGATCTAATGTAATAATTTGAGGGAAAGAAGTATCAAAGTT |
| 610 | GAGGGAGGAGGGGGCATGATGAGGCCATGTAGTTGACATTGGTATTGTGTAGCTGAGCTG[A/G]CACAGAATACAGCAGAGTATCCCCCTGACTATTCCCTATTTCAAAGATATATAACTTTT      |
| 611 | TTTGTGTTGGGATTTTGGGGTAAAGGGAATGAAAGTTCCTACCCTTAAATGAACCTCC[T/C]CCTTTCTATCATTGATGTCAGCTCATATAACCCACCTAAGGAGCCTTCTCCCACCAC          |
| 612 | GGCTAGTGGGAACAATTCAACATGGAATTAGTATCTTTCTCTAGGGATTTATGGTCATTT[A/G]GCATTTTGTGCCTTTTATCTGTCCATAAGAGTGCAGATAATGAGCTACTTCTGAGAAG       |
| 613 | TGGATCAAGGAGCACCCAGAAGTGGTTTATTTGGGGTTTTTCAGTTTGAATAAACCAACT[A/C]TGAGACAAGTCCCAAAGGTGGAGTTGTCAAATGTGAAGGATAGCCTTGTAAATTTAAG       |
| 614 | GGGTAGAATGTTTTAACTTTAGGCATTTTAGAAAAATTTTTCAGTTTGTAAATAACCAACT[T/C]CCACTTTTCAAATAATGACACAACAGGACTGATTTCAAAGATTGGAATACCAAACAT       |
| 615 | CCCCTAGTTCCCTACTCATTACACAGTCAAATGAGTTTGAGAAATGCTGAGTTACACAAG[A/T]TTAAGAAATTTCTTGTCTAGGACTTATTGGTAGCCATTAAATTAATGTGCATAGCAAA       |
| 616 | TAAAGGTCAACTTTTATAGATATAAACATAACAGAGTTTTATGCAGTTTGAAGAAAGAAAG[A/G]CAAGATTATTTAGGAACCTTTGATCTGTCTTTTTAACCGCTCCTTCTCTTTTGTAGT       |
| 617 | TATTATTAGAAAATATGTTCTTTTCTATTCCGGGGATAGTTTGCAAAACAGATCTTTTTA[T/C]TTTGGAAAATGAATGAGTATATTATTGCCTACAACCTGTAGCTATGAGAACTCAATTTTA     |
| 618 | AAGGCTGGCCTAGTTGATATAAATCTTTTCTCCTACAATTTCTGAGCTTTTGCCTTCTT[C/T]CAAAGGTACATTTGATATAACCAACACAGGAGTTACAATTAATGAAAGACTTTCTAAA        |
| 619 | CATGGAATGTTGGTGAAGCCCTCTGCCAGGGAAGCAATCTGGCTGTGCAAAGTGTGCTGCT[A/G]GTGGGGAGGACTCCTGGAAATCTGACTGACCCCTATTCCCTGCTTAGGAACCTGAGGGGT    |
| 620 | gaggttcgttccccaggtccccctgggaacagagggctgcctagccagcctccccactaa[T/C]gagatattcccttgggagcctccccattcaagatgagtgccattctgatcttactag        |
| 621 | GGTTGTACTCTCAACAGCATCTTGGTAGCATTCTGTCTTTGTTTACTAGCAGAAATAC[T/C]CTATGAGGAGAAACTGCCCCCAACAACAACCTGGTTACTCTGAGTAATGTTACATACAA        |
| 622 | ATTCTAATGTGGGTTAAATGATCAAGAGAAAATCCTCCAAAGGCAGCACAGGAATTT[C/A/G]CTTGATCTCCTGATTCCTGTTTTTGGTTAGATTACTAGAGACACTGTCAGGTTAAAACA       |
| 623 | CTACTGTATAGCAAAGCCAATTAGCTGGGGGCTGTTCCCTACTATGCCATGAGTGTGGC[T/C]GACTATTCCCTGCCTTTCTTTTAGACACCTGTTTCTTAGAATGCTTCTCTTGTCCCTCT       |
| 624 | CTTCCAGCCACCTGATTACAAATCCAAAGCTTCTTTGGTGCAGTCGATAAACTAGTCTG[T/C]TCATGTAATGTAAGTTCTCCTTCTCCCCATCCCCATTTTCTGACCTTCTGCAACACA         |
| 625 | GCTGTATGCGGAATCCACCTGGAAGCCAGGTTGTTTTATAGAGGTTCTTGATTTTTAC[A/G]TAATTGCCAATAATGTGTGAGAAACTTAAAGAACAGCTAACAATAAAGTGTGAGGACGGT       |
| 626 | CTCCACTCCGGTAACTTTGGTGAGTTGAGAGCTTTCTGTTTGTGTTTCCCTCCTTTACCA[T/C]CCAGAAATCCATTTGAGTCTGCTCCTTGTGGTTAAGGACTGGCGTTTGCAGGGAGGTGCG     |
| 627 | ACTCCTTAAAGGGGAACATCTGGGTGAGCCTGGCCTAGCTAGGCTTGTGAAGGGCA[T/C]TGGGCCCTTCTTGAGAAAGATGTGAAGCGTGACAGGGATTTGACACAGGGCCATTATCTG         |
| 628 | TAGTCTGTAGGTGATTTGATGCTGCCAAATGTGGAGAACCCTGGTTTTCTGTCTGTA[T/C]AACCCCTTTGAATGGACTCTTAAATAAATAATTTCACTCACAGACGCTGGCAGTTGGTT         |
| 629 | GCCAAGCTCTGACTTCCCTGAGAACCCTGAAACATAGTTTCTTCTGCATAGAAATTT[C/A/G]TGCCCACTCGTACTCATATTGGTTCTCTCCTTTTTGTCTTTAGTCTCAGACTTAATAG        |
| 630 | ATATATAATTTGAATATAATATAGAAATAATAGAAATAAGTACACTAAGGTGGGAGTAAT[T/C]AACCAGAGAGAGGTCATGACACTTGATCTGAATGACGAGTACTCACTGGGCTAGAAAGGA     |
| 631 | GAAGCAATATTCAGCTCATTCTGTTATAACTAGTCTGACATGGTCTTAAATGTAAAAA[C/G]ACTATCATAGCTAATAGGATTATTTAAAGGCTGTTTCATTTTATTAGTGATAAAAACT         |

Complete list of all 94 genes and 1,536 SNPs present on the COGS SNP Chip

|     | A        | B         | C          | D                                           | E         | F     | G         | H             | I      | J         |
|-----|----------|-----------|------------|---------------------------------------------|-----------|-------|-----------|---------------|--------|-----------|
| 1   | Cytoband | Gene Name | Gene Alias | Description                                 | Size (kb) | Chrom | SNP ID    | Position (bp) | htSNP* | Coding    |
| 632 | 6p22.3   | DTNBP1    | Dysbindin  | dystrobrevin binding protein 1              | 140.2     | 6     | rs3213207 | 15736081      |        |           |
| 633 | 6p22.3   | DTNBP1    | Dysbindin  | dystrobrevin binding protein 1              | 140.2     | 6     | rs1011313 | 15741411      | T      |           |
| 634 | 6p22.3   | DTNBP1    | Dysbindin  | dystrobrevin binding protein 1              | 140.2     | 6     | rs6459409 | 15744832      | T      |           |
| 635 | 6p22.3   | DTNBP1    | Dysbindin  | dystrobrevin binding protein 1              | 140.2     | 6     | rs2619528 | 15757808      |        |           |
| 636 | 6p22.3   | DTNBP1    | Dysbindin  | dystrobrevin binding protein 1              | 140.2     | 6     | rs2619522 | 15761628      |        |           |
| 637 | 6p22.3   | DTNBP1    | Dysbindin  | dystrobrevin binding protein 1              | 140.2     | 6     | rs1018381 | 15765049      |        |           |
| 638 | 6p22.3   | DTNBP1    | Dysbindin  | dystrobrevin binding protein 1              | 140.2     | 6     | rs1474605 | 15766191      | T      |           |
| 639 | 6p22.3   | DTNBP1    | Dysbindin  | dystrobrevin binding protein 1              | 140.2     | 6     | rs1997679 | 15766884      | T      |           |
| 640 | 6p22.3   | DTNBP1    | Dysbindin  | dystrobrevin binding protein 1              | 140.2     | 6     | rs909706  | 15768850      |        |           |
| 641 | 6p22.3   | DTNBP1    | Dysbindin  | dystrobrevin binding protein 1              | 140.2     | 6     | rs9476886 | 15769440      | T      |           |
| 642 | 6p22.1   | MOG       |            | myelin oligodendrocyte glycoprotein         | 15.4      | 6     | rs29254   | 29731573      | T      |           |
| 643 | 6p22.1   | MOG       |            | myelin oligodendrocyte glycoprotein         | 15.4      | 6     | rs29234   | 29732091      | T      |           |
| 644 | 6p22.1   | MOG       |            | myelin oligodendrocyte glycoprotein         | 15.4      | 6     | rs2256266 | 29740297      | T      |           |
| 645 | 6p22.1   | MOG       |            | myelin oligodendrocyte glycoprotein         | 15.4      | 6     | rs2747419 | 29750173      | T      |           |
| 646 | 6p21.32  | NOTCH4    |            | notch homolog 4                             | 33.3      | 6     | rs204991  | 32269344      | T      |           |
| 647 | 6p21.32  | NOTCH4    |            | notch homolog 4                             | 33.3      | 6     | rs2071286 | 32287874      | T      |           |
| 648 | 6p21.32  | NOTCH4    |            | notch homolog 4                             | 33.3      | 6     | rs379464  | 32294326      | T      |           |
| 649 | 6p21.32  | NOTCH4    |            | notch homolog 4                             | 33.3      | 6     | rs422951  | 32296361      | T      | Thr320Ala |
| 650 | 6p21.32  | NOTCH4    |            | notch homolog 4                             | 33.3      | 6     | rs520692  | 32296618      |        |           |
| 651 | 6p21.32  | NOTCH4    |            | notch homolog 4                             | 33.3      | 6     | rs2071282 | 32296921      | T      | Pro204Leu |
| 652 | 6p21.32  | NOTCH4    |            | notch homolog 4                             | 33.3      | 6     | rs915894  | 32298368      |        | Lys117Gln |
| 653 | 6p21.32  | NOTCH4    |            | notch homolog 4                             | 33.3      | 6     | rs3134931 | 32298598      | T      |           |
| 654 | 6p21.32  | NOTCH4    |            | notch homolog 4                             | 33.3      | 6     | rs532385  | 32303337      | T      |           |
| 655 | 6p21.31  | GRM4      | MGLUR4     | glutamate receptor, metabotropic 4          | 133.8     | 6     | rs7762948 | 34094069      | T      |           |
| 656 | 6p21.31  | GRM4      | MGLUR4     | glutamate receptor, metabotropic 4          | 133.8     | 6     | rs2229901 | 34098425      | T      |           |
| 657 | 6p21.31  | GRM4      | MGLUR4     | glutamate receptor, metabotropic 4          | 133.8     | 6     | rs7772436 | 34099346      | T      |           |
| 658 | 6p21.31  | GRM4      | MGLUR4     | glutamate receptor, metabotropic 4          | 133.8     | 6     | rs2451383 | 34113047      | T      |           |
| 659 | 6p21.31  | GRM4      | MGLUR4     | glutamate receptor, metabotropic 4          | 133.8     | 6     | rs9469690 | 34120889      | T      |           |
| 660 | 6p21.31  | GRM4      | MGLUR4     | glutamate receptor, metabotropic 4          | 133.8     | 6     | rs3778068 | 34136383      | T      |           |
| 661 | 6p21.31  | GRM4      | MGLUR4     | glutamate receptor, metabotropic 4          | 133.8     | 6     | rs1906953 | 34144424      | T      |           |
| 662 | 6p21.31  | GRM4      | MGLUR4     | glutamate receptor, metabotropic 4          | 133.8     | 6     | rs2499689 | 34149284      | T      |           |
| 663 | 6p21.31  | GRM4      | MGLUR4     | glutamate receptor, metabotropic 4          | 133.8     | 6     | rs2451341 | 34149425      | T      |           |
| 664 | 6p21.31  | GRM4      | MGLUR4     | glutamate receptor, metabotropic 4          | 133.8     | 6     | rs1565364 | 34156504      | T      |           |
| 665 | 6p21.31  | GRM4      | MGLUR4     | glutamate receptor, metabotropic 4          | 133.8     | 6     | rs1873249 | 34161402      | T      |           |
| 666 | 6p21.31  | GRM4      | MGLUR4     | glutamate receptor, metabotropic 4          | 133.8     | 6     | rs874631  | 34170783      | T      |           |
| 667 | 6p21.31  | GRM4      | MGLUR4     | glutamate receptor, metabotropic 4          | 133.8     | 6     | rs2499713 | 34171329      | T      |           |
| 668 | 6p21.31  | GRM4      | MGLUR4     | glutamate receptor, metabotropic 4          | 133.8     | 6     | rs733457  | 34176386      | T      |           |
| 669 | 6p21.31  | GRM4      | MGLUR4     | glutamate receptor, metabotropic 4          | 133.8     | 6     | rs747373  | 34188002      | T      |           |
| 670 | 6p21.31  | GRM4      | MGLUR4     | glutamate receptor, metabotropic 4          | 133.8     | 6     | rs2499722 | 34191437      | T      |           |
| 671 | 6p21.31  | GRM4      | MGLUR4     | glutamate receptor, metabotropic 4          | 133.8     | 6     | rs937031  | 34193665      | T      |           |
| 672 | 6q14.1   | HTR1B     | 5-HT1DB    | 5-hydroxytryptamine (serotonin) receptor 1B | 1.3       | 6     | rs6296    | 78228979      |        |           |
| 673 | 6q23.2   | TAAR6     | TRAR4      | trace amine associated receptor 6           | 1.0       | 6     | rs8192624 | 132933946     | T      | Val265Ile |

Key appears on page 109.

Complete list of all 94 genes and 1,536 SNPs present on the COGS SNP Chip

|     | K      | L      | M                                                                                                                                                          | N       | O       | P       | Q       |
|-----|--------|--------|------------------------------------------------------------------------------------------------------------------------------------------------------------|---------|---------|---------|---------|
| 1   | Prom** | TFBS** | Association (reference)                                                                                                                                    | MAF_CEU | MAF_YRI | MAF_JPT | MAF_HCB |
| 632 |        |        | p=0.00009 (Straub et al. 2002), p=0.005 (Schwab et al. 2003), p=0.17 (van den Ord et al. 2003), p=0.020 (Li et al. 2005), p=0.036 (Stefanis et al. 2007)   | 0.12    | 0.03    |         | 0.01    |
| 633 |        |        | p=0.009 (Schwab et al. 2003), haplotype (Straub et al. 2002; Funke et al. 2004)                                                                            | 0.07    | 0.00    | 0.19    | 0.23    |
| 634 |        |        |                                                                                                                                                            | 0.17    | 0.08    | 0.27    | 0.29    |
| 635 |        |        | p=0.002 (Li et al. 2005), p=0.013 (van den Ord et al. 2003), p=0.014 (Schwab et al. 2003), p=0.047 (Straub et al. 2002)                                    | 0.19    | 0.37    | 0.09    | 0.07    |
| 636 |        |        | p=0.005 (Stefanis et al. 2007), p=0.015 (Funke et al. 2004), p=0.030 (Schwab et al. 2003), p=0.047 (Straub et al. 2002), p=0.066 (van den Ord et al. 2003) | 0.18    | 0.36    |         | 0.08    |
| 637 |        |        | p=0.0006 (Funke et al. 2004), p=0.026 (Stefanis et al. 2007), haplotype (Straub et al. 2002; Schwab et al. 2003; van den Ord et al. 2003)                  | 0.08    | 0.31    | 0.09    | 0.06    |
| 638 |        |        |                                                                                                                                                            | 0.19    | 0.36    | 0.09    | 0.07    |
| 639 |        |        |                                                                                                                                                            | 0.28    | 0.43    | 0.09    | 0.06    |
| 640 |        |        | haplotype (Straub et al. 2002; Li et al. 2005; Funke et al. 2004)                                                                                          |         |         |         |         |
| 641 |        |        |                                                                                                                                                            | 0.25    | 0.47    | 0.42    | 0.34    |
| 642 |        |        |                                                                                                                                                            | 0.04    | 0.00    | 0.02    | 0.14    |
| 643 |        |        |                                                                                                                                                            | 0.05    | 0.17    | 0.02    | 0.01    |
| 644 |        |        |                                                                                                                                                            | 0.31    | 0.05    | 0.22    | 0.28    |
| 645 |        |        |                                                                                                                                                            | 0.03    | 0.04    |         | 0.00    |
| 646 |        |        |                                                                                                                                                            | 0.14    | 0.16    | 0.21    | 0.33    |
| 647 |        |        |                                                                                                                                                            | 0.20    | 0.01    | 0.29    | 0.16    |
| 648 |        |        |                                                                                                                                                            | 0.01    | 0.23    | 0.08    | 0.10    |
| 649 |        |        | haplotype (Wang et al. 2006; Zhang et al. 2004)                                                                                                            | 0.37    | 0.27    | 0.27    | 0.22    |
| 650 |        |        | p=0.002 (Wang et al. 2006), p=0.017 (Zhang et al. 2004)                                                                                                    | 0.07    | 0.25    | 0.25    | 0.18    |
| 651 |        | Y      |                                                                                                                                                            | 0.03    | 0.00    | 0.09    | 0.06    |
| 652 |        |        | haplotype (Wang et al. 2006)                                                                                                                               | 0.35    | 0.36    |         | 0.48    |
| 653 |        |        |                                                                                                                                                            | 0.22    | 0.43    | 0.44    | 0.42    |
| 654 |        |        |                                                                                                                                                            | 0.13    | 0.39    | 0.42    | 0.42    |
| 655 |        |        |                                                                                                                                                            | 0.04    | 0.42    | 0.04    | 0.05    |
| 656 |        |        |                                                                                                                                                            | 0.18    | 0.26    | 0.27    | 0.42    |
| 657 |        |        |                                                                                                                                                            | 0.06    | 0.28    | 0.03    | 0.04    |
| 658 |        |        |                                                                                                                                                            | 0.23    | 0.23    | 0.31    | 0.50    |
| 659 |        |        |                                                                                                                                                            | 0.16    | 0.49    | 0.24    | 0.32    |
| 660 |        |        |                                                                                                                                                            | 0.38    | 0.33    | 0.43    | 0.43    |
| 661 |        |        |                                                                                                                                                            | 0.10    | 0.39    | 0.40    | 0.46    |
| 662 |        |        |                                                                                                                                                            | 0.03    | 0.21    | 0.06    | 0.16    |
| 663 |        |        |                                                                                                                                                            | 0.01    | 0.17    | 0.06    | 0.14    |
| 664 |        |        |                                                                                                                                                            | 0.23    | 0.33    | 0.44    | 0.42    |
| 665 |        |        |                                                                                                                                                            | 0.48    | 0.23    | 0.23    | 0.28    |
| 666 |        |        |                                                                                                                                                            | 0.09    | 0.05    | 0.26    | 0.24    |
| 667 |        |        |                                                                                                                                                            | 0.07    | 0.01    | 0.19    | 0.14    |
| 668 |        |        |                                                                                                                                                            | 0.41    | 0.27    | 0.36    | 0.48    |
| 669 |        |        |                                                                                                                                                            | 0.02    | 0.16    | 0.01    | 0.02    |
| 670 |        |        |                                                                                                                                                            | 0.43    | 0.34    | 0.43    | 0.43    |
| 671 |        |        |                                                                                                                                                            | 0.03    | 0.23    | 0.10    | 0.12    |
| 672 |        |        |                                                                                                                                                            | 0.34    | 0.24    |         | 0.46    |
| 673 |        |        |                                                                                                                                                            | 0.08    | 0.03    | 0.07    | 0.03    |

Key appears on page 109.

|     | R                                                                                                                                       |
|-----|-----------------------------------------------------------------------------------------------------------------------------------------|
| 1   | Sequence                                                                                                                                |
| 632 | CATGGTATATTCTAAATGTATTAGGGAACCTTTCTTTGAAGACTTCCTTTTCGTAAGCCA[A/G]TAATTACCCGTTAATTATGTTTATGTTTGTCTTTTGGTTGTTAGTGGTAGTTTTT                |
| 633 | ACAATAACACTTAAAAGTTGATATGACTCCTTAATTCACAGGCTACAGAATGGATGTTGC[A/G]TTAGTGGGCATGAAAACAATGTTAATTAACAGTTGCTTGTGTGCAGTAACCTGGCGTCTC           |
| 634 | TGCCAATCTTAGGAAGCCAGACAGGTTTCCTTGTGACTCCTTTAGCCAACAGGTACA[T/C]TTTTTTCCCCCTAGCTTAAGCTTTCCACAGGGGGATGTAGCCACTCAAAGTCCAAAGA                |
| 635 | TGTAATATACATAGCATAAAAATGTATCTTAACCATTTAAAGCTTTAGCTTAGTAGTGTGAGAGCTGACA[A/G]TTCACATGGTTGTGCATCCAATCCAAAAACTCTTTTCATCTTGCAAAAATGGAAACTGTG |
| 636 | TAGAGGGGAGGAGACTGCTAGAATTAATAGCTGGCAGAAGCAGTGAGTGAGAGCTGACA[T/G]CCAGGTGACCAATGGTAGAGAAAAGAAAATTTAGGAAAGGTAGACATAAGAGCCCAAAACAA          |
| 637 | AATGATGTAGACAGTTGGAAATTGAGTTACAAGTAAATGAAACGTCATGCAGGTTCCGCA[T/C]GCTGTGAATCACCGGCAGATCTCAGCAGTCATTGTAGTACTCAATG                         |
| 638 | GCAAAGCAGAATGAACAGAATGTTAAAGATACAAATAGTGTGGTATGTGAGTCCGAAGAA[A/G]GAGTCATTAGTTAGGATGCATTTACAGAAGGCTTCAAAGAGGAAGGGGTTTTCTAAAACATA         |
| 639 | ATACCAAAGTACATACTTCGAAGCCACTCTGGTCTTTGACTTTTTACCTTTTGTAGCTGTTA[T/C]GACCAAAGGCCTCAGGATTGAGGTATTTAGGCATGCAAACCTTCAGGGAACTGAAAATC          |
| 640 | GAGATCAGGGTAACCCATAACGTTTAGAGTTAGTTAAGGAGAGACATGCCAAAGGGATCT[A/G]GTTAGAACCCCTTGGAAACTGACTTGACTTCTTAAAGATGCCGTAGTCTGGGGCCATTTT           |
| 641 | TTTGGCTAACATCTTTCTCATTAGAAATTTAAACGAGGCTGGGCGCAGTGACTAATACC[T/C]ATAATCCCACCCTCAGGAAGCCTAGGAGGGAGGATCTCTTGTACCCAGGAGTTGGAGG              |
| 642 | TTGGACACAAGCAATGTTTGGTACTCTGGTGTGTGTGGTTGAAAGTCA[A/G]GATTGCAGGGGTCAATCCCATGGAAAAAGTGGCCGCTGTGGATCTCTGGC                                 |
| 643 | TCCTCAGTGTACAGGGGAGAGTGAGATCTGGAATGAAAATGACCTTTCTCTCACCTCT[T/G]GGCTCAGCTGAGAATTGCAAGTGTGAGACCAGCATTGGTAGCAGGTTCCAAAAATAGACT             |
| 644 | ACAGGTGTGAGCCACCATGCCCGCTGAAACTACCTTCTTAAAGCTCTAGAAGAGGGCT[T/C]TAACTTTTGTGTGTGCATGCACCTCCGCAAGCTGATGAAGTTGATAGACCCATCT                  |
| 645 | GGCTAGAAATAAGAAGAAAAAAGAAAAAATTGGCTTTCAAATTAGAAGCAAATAAAAA[T/G]TAACTGGAATCTTTCAACTGTCCAGAAATGTAATTTTAACTTACAACAACACTTCTT                |
| 646 | CATATCTATATCTTTATGCCCAAAATAAACTTTCCCTGCCCTTGTCTGCACTAAACT[A/G]TAAGTTTCCAAAATGAACCTTCCCGTACTCTATTTGGTACACATCTGTCTCCTGAATA                |
| 647 | TCTGTCTGATCATATAACCCAGGCAGAGTGACCACACTTAATCCAGCTACACTCAAC[A/G]CATTTACCCCCACCCACTACTTCGATGTACGCCACCCTCTTTGTAAGAAGCACTAA                  |
| 648 | GAGATCCCAAAGTGGAGGAATTTGAAGTGCATCTGGGAAGCTTGTGCTCCTATATTTGT[T/C]CCGTTGCTTTGGGTTATCCTGGTCTCCACTGTTTCATCCTGAATTGAGGTGGGATCAAC             |
| 649 | TCGTCCCTCCCAACCCCTGCAGGCTGGGACTGCTCCGAAGATGTGGATGAGTGTGAG[A/G]CCAGGGTCCCTCCTACTGCAGAAACGGGGGCACCTGCCAGAACTCTGCTGGTAGCTTTT               |
| 650 | TCTCCGTTGGAGCCTCCTCCACAGCTGATCCATGACCCTGTGAGTTTCATAGGCCCGG[A/G]CTGTGAGGTGAATCCAGACAACCTGTGTCAGCCACCAATGTCAGAATGGGGGCACCTGCCA            |
| 651 | CGGGCTTCGAGGGCCATGCCTGTGAACGTGATGTCAACGAGTGCTTCCAGGACCCAGGAC[T/C]CTGCCCAAAGGCACCTCCTGCCATAACACCCTGGGCTCCTCCAGTGCCTCTGCCCTGT             |
| 652 | TTGACACCCAGCTTCTTGTGCACTTGCCTCCCTGGCTTCACTGGTGAGAGATGCCAGGCC[A/C]AGCTTGAAGACCCTTGTCTCCCTCCTTCTGTTCCAAAAGGGGCCGCTGCCACATCCAGG            |
| 653 | AAGGAGATGAAGGGAAACAAATGAAGGCAGAGGAGGGAGTGGGCAAGAATAGGAAGAGGG[A/G]CCAGTGATGTGAGTTTTCTCTCCTCCCTGCCAGGTGTGCCCTGGCTTCTGGGTGA                |
| 654 | CAGGGGTATACAATGAAAGAAAATCCCTTAATAAAAATGAATCTCTATTTGATGAAATA[T/C]GTAGGAAAAAGGGTCATTTCCAGAGGGAACATCTGTATCCCTGGCATGCTGCAGTTC               |
| 655 | GCTCTGTTAACTCATTATGAAATTTTCCCGATATACAGGAAGGAGAGCAGGATAAAGA[T/C]TGCCCGCTCAAGAATCATCCACTTTTGGCCACGTTGGCTTCACTCTGCTGCTCCCTGCC              |
| 656 | TGCTGCCCGTGGGCACCCACGACGTGGCTTGGTGTGAGGATGACAGAGCCCCACGCT[A/G]TCACTGTGGCAGCCTGGGCAAACCGGTTAGCAACAGGAGGACGAGGGCCGGGGCGGT                 |
| 657 | CCCCAGATCCCCAGGGCCTCTGAGCACCTACCTTTCTACTTCTTGGTGGCCCTGTCTC[T/C]CTCAGTCTTGTAGCCCCCTTTTCTGCCCTGTCCCTCTGGCCCTTACTCCACACCAGGAC              |
| 658 | TCTTTACATCTTGTCTAAATTAAGTGTACCCACAGTTACACGTCCCTGAAGACACAATG[A/G]CTGTGAGCAATAGAGCCACAGAGTGTGTACACCCCTACTGAATATGTTACAATATTCT              |
| 659 | CTCAGGCCCTTCCCTTGTGCCCCACAGGAAACAACGACAGGACCTAGGTGACTCCCTGG[A/C]GGGGTAGCGGGGCATGTAGGGGAGGGGTGGGGGATACTGCAGGAACCAAAACCCCTCACT            |
| 660 | CATCTGAGCTGAAGGTGTCTCAAAAACAGCAGGCCCTGGAGTGAGGCACATAGCTGGGTG[C/G]GGTGTGGGAGCCTAATCTTACCAGGCTTTGGGATGGGAGTAGGGGGCAGGAAGTCAGGGA           |
| 661 | AGACCCATCCCCCGCACACCACCTTGTGGGATGTGCCTATCTCATGCAGTCAGCCTGGG[T/C]GGGCTGAAAGGAAAGGCCTCCCGTAAGAGGAGCCGGCTTGTGCCCTGCCTCACCCACTCC            |
| 662 | CACCATACACAGTCAGATACGCACCACACAAAATACATAACCACACACAGAGTCACA[A/G]ATACACCACACACAGACACAGGTAACCCTGGACAGTCACATATAACAAGCCTGCCTGACC              |
| 663 | AAGCACAAGCAGGCGGTGCCACCGTGAAGCGTCCACACCCCCACCCTCACACTGCCTGG[T/C]GGCTCTCACACAGTCACCGCAGTGAACAAAGCACCCCTCCAGCCCATCTCTTAACT                |
| 664 | GCACCAGAGGAGTGGCTGCCAGGGGATTGAGCCTCCAGACCCTTTCAGAAAGGGGCC[C/G]TACAGCTCATACTTGGTACGCAGGAGTCACACGTGACTTGAGGGATCCTGATCCACTT                |
| 665 | AGAGAGCTAAAGAAGAAGTGAAGTAGTTGGGGGCTGGATTTTGAATTAACcattcattca[A/G]jaaacattattgagcaactactatgtgccagggtgtgtagatgtggagatgcagcg               |
| 666 | CCCCCACCCCTCTGGGAGAATGCAGTGTGTGCCGTGGGCCAGGGCCAGTGTGCCAGGGCC[T/C]CACTCTGGATTTGGGCCAGGGTCTGAAGGCTTCTAACGAGTCTGGCCCCACAGGGGATGC           |
| 667 | AGCTGTCTCCTAAGGCTGTGAGGGTCACATGAGGGAATTAAGCAAGCACTCAGAACAG[T/C]GCCTGGCAGGCGGTAAGCACTAAGGGTCAGCTCTTAGGGGAGCTGCCATTCTCCCGCTA              |
| 668 | TTGACCAGGGTTTACTGAGCACCCACTGAGTGTCTGCATGATCCCTGCCCTCATGGAGC[T/G]GACATCCGAGTGGGAGAGACAATCAATAGTGAATGAATACACACAGAGCTAATGCTGGGT            |
| 669 | AGAGCTGAAGCAGGGAGATGCTGCCTCCCTGGGGCGGGGAGAGGAGGAAAAGAAAGGG[C/G]CTATTTAATTTAATCCGTGTTTTATCGCTCGTTGGATAAATAACCTTATTAAGATGGA               |
| 670 | GAAAGAGCCTTTCTAGCTTCCCAAAGGGGCCCTGGGACAAGCCTTGCTGGGTTTTGGGCC[T/C]AACTCCAATCCTCTGTCTGCTCCCAGCCCTCCCTAAAATACTGTGCAGCGGAGGCTGGA            |
| 671 | TGGCATTCAATGGCTAGGTATCACCCAAGGGGCCCTCGCATCTTTATATACTATGTCT[T/C]GCTGGTGGCTGGTTGGATGTGAGATCTTGGGGCTGCTTACCTGGCTGCATCTATGATTT              |
| 672 | CACCTCTATTAACCTCGCGGGTTCCCGACGTGCCAGCGAATCCGGATCTCCTGTGTATGT[C/G]AACCAAGTCAAAGTGGCAGTCTCCGACGCCCTGCTGGAAAAGAAAGAACTCATGGCCGCT           |
| 673 | TACAAAGCCAGAGTGGCCAGGAGAGAGAAAAGCAGCTAAAACCCCTGGGGTCACAGT[A/G]TAGCATTTATGATTTTATGTTTACCATATAGCATTGATTCATTAATTGATGCCTTTATGG              |



Complete list of all 94 genes and 1,536 SNPs present on the COGS SNP Chip

| 1   | A        | B         | C          | D                                  | E         | F     | G          | H             | I      | J         |
|-----|----------|-----------|------------|------------------------------------|-----------|-------|------------|---------------|--------|-----------|
|     | Cytoband | Gene Name | Gene Alias | Description                        | Size (kb) | Chrom | SNP ID     | Position (bp) | htSNP* | Coding    |
| 674 | 6q23.2   | TAAR6     | TRAR4      | trace amine associated receptor 6  | 1.0       | 6     | rs8192625  | 132934025     | T      | Cys291Tyr |
| 675 | 6q23.2   | TAAR6     | TRAR4      | trace amine associated receptor 6  | 1.0       | 6     | rs7772821  | 132934199     | T      |           |
| 676 | 6q23.2   | TAAR6     | TRAR4      | trace amine associated receptor 6  | 1.0       | 6     | rs4305745  | 132935405     |        |           |
| 677 | 6q23.2   | TAAR6     | TRAR4      | trace amine associated receptor 6  | 1.0       | 6     | rs6903874  | 132938603     |        |           |
| 678 | 6q24.3   | GRM1      | MGLUR1     | glutamate receptor, metabotropic 1 | 409.8     | 6     | rs12216492 | 146418311     | T      |           |
| 679 | 6q24.3   | GRM1      | MGLUR1     | glutamate receptor, metabotropic 1 | 409.8     | 6     | rs4896857  | 146488865     | T      |           |
| 680 | 6q24.3   | GRM1      | MGLUR1     | glutamate receptor, metabotropic 1 | 409.8     | 6     | rs4607452  | 146529796     | T      |           |
| 681 | 6q24.3   | GRM1      | MGLUR1     | glutamate receptor, metabotropic 1 | 409.8     | 6     | rs4895691  | 146564647     | T      |           |
| 682 | 6q24.3   | GRM1      | MGLUR1     | glutamate receptor, metabotropic 1 | 409.8     | 6     | rs4272232  | 146605615     | T      |           |
| 683 | 6q24.3   | GRM1      | MGLUR1     | glutamate receptor, metabotropic 1 | 409.8     | 6     | rs7744909  | 146607938     | T      |           |
| 684 | 6q24.3   | GRM1      | MGLUR1     | glutamate receptor, metabotropic 1 | 409.8     | 6     | rs7750079  | 146643446     | T      |           |
| 685 | 6q24.3   | GRM1      | MGLUR1     | glutamate receptor, metabotropic 1 | 409.8     | 6     | rs362956   | 146668721     | T      |           |
| 686 | 6q24.3   | GRM1      | MGLUR1     | glutamate receptor, metabotropic 1 | 409.8     | 6     | rs941901   | 146698944     | T      |           |
| 687 | 6q24.3   | GRM1      | MGLUR1     | glutamate receptor, metabotropic 1 | 409.8     | 6     | rs362862   | 146702961     | T      |           |
| 688 | 6q24.3   | GRM1      | MGLUR1     | glutamate receptor, metabotropic 1 | 409.8     | 6     | rs1983635  | 146707365     | T      |           |
| 689 | 6q24.3   | GRM1      | MGLUR1     | glutamate receptor, metabotropic 1 | 409.8     | 6     | rs362836   | 146708451     | T      |           |
| 690 | 6q24.3   | GRM1      | MGLUR1     | glutamate receptor, metabotropic 1 | 409.8     | 6     | rs61914    | 146717958     | T      |           |
| 691 | 6q24.3   | GRM1      | MGLUR1     | glutamate receptor, metabotropic 1 | 409.8     | 6     | rs725186   | 146718101     | T      |           |
| 692 | 6q24.3   | GRM1      | MGLUR1     | glutamate receptor, metabotropic 1 | 409.8     | 6     | rs362895   | 146721019     | T      |           |
| 693 | 6q24.3   | GRM1      | MGLUR1     | glutamate receptor, metabotropic 1 | 409.8     | 6     | rs362848   | 146724178     | T      |           |
| 694 | 6q24.3   | GRM1      | MGLUR1     | glutamate receptor, metabotropic 1 | 409.8     | 6     | rs9403775  | 146728202     | T      |           |
| 695 | 6q24.3   | GRM1      | MGLUR1     | glutamate receptor, metabotropic 1 | 409.8     | 6     | rs2300620  | 146745874     | T      |           |
| 696 | 6q24.3   | GRM1      | MGLUR1     | glutamate receptor, metabotropic 1 | 409.8     | 6     | rs362925   | 146757695     | T      |           |
| 697 | 6q24.3   | GRM1      | MGLUR1     | glutamate receptor, metabotropic 1 | 409.8     | 6     | rs362854   | 146758161     | T      |           |
| 698 | 6q24.3   | GRM1      | MGLUR1     | glutamate receptor, metabotropic 1 | 409.8     | 6     | rs362936   | 146762519     | T      | Gly884Glu |
| 699 | 6q24.3   | GRM1      | MGLUR1     | glutamate receptor, metabotropic 1 | 409.8     | 6     | rs979775   | 146767662     | T      |           |
| 700 | 6q24.3   | GRM1      | MGLUR1     | glutamate receptor, metabotropic 1 | 409.8     | 6     | rs7755078  | 146768262     | T      |           |
| 701 | 6q24.3   | GRM1      | MGLUR1     | glutamate receptor, metabotropic 1 | 409.8     | 6     | rs2300626  | 146771510     | T      |           |
| 702 | 6q24.3   | GRM1      | MGLUR1     | glutamate receptor, metabotropic 1 | 409.8     | 6     | rs3804295  | 146781896     | T      |           |
| 703 | 6q24.3   | GRM1      | MGLUR1     | glutamate receptor, metabotropic 1 | 409.8     | 6     | rs2284796  | 146788588     | T      |           |
| 704 | 6q24.3   | GRM1      | MGLUR1     | glutamate receptor, metabotropic 1 | 409.8     | 6     | rs2941     | 146796825     | T      | Val929Ile |
| 705 | 6q24.3   | GRM1      | MGLUR1     | glutamate receptor, metabotropic 1 | 409.8     | 6     | rs7770466  | 146800958     | T      |           |
| 706 | 6q25.1   | ESR1      | NR3A1      | estrogen receptor 1                | 295.7     | 6     | rs488133   | 152167137     | T      |           |
| 707 | 6q25.1   | ESR1      | NR3A1      | estrogen receptor 1                | 295.7     | 6     | rs532010   | 152172611     | T      |           |
| 708 | 6q25.1   | ESR1      | NR3A1      | estrogen receptor 1                | 295.7     | 6     | rs11155813 | 152191128     | T      |           |
| 709 | 6q25.1   | ESR1      | NR3A1      | estrogen receptor 1                | 295.7     | 6     | rs9479130  | 152210149     | T      |           |
| 710 | 6q25.1   | ESR1      | NR3A1      | estrogen receptor 1                | 295.7     | 6     | rs1709182  | 152217050     | T      |           |
| 711 | 6q25.1   | ESR1      | NR3A1      | estrogen receptor 1                | 295.7     | 6     | rs9340820  | 152217518     | T      |           |
| 712 | 6q25.1   | ESR1      | NR3A1      | estrogen receptor 1                | 295.7     | 6     | rs1709183  | 152235689     | T      |           |
| 713 | 6q25.1   | ESR1      | NR3A1      | estrogen receptor 1                | 295.7     | 6     | rs9340835  | 152241624     | T      |           |
| 714 | 6q25.1   | ESR1      | NR3A1      | estrogen receptor 1                | 295.7     | 6     | rs6557170  | 152244797     | T      |           |
| 715 | 6q25.1   | ESR1      | NR3A1      | estrogen receptor 1                | 295.7     | 6     | rs7761846  | 152254201     | T      |           |

Key appears on page 109.

|     | K      | L      | M                                                       | N       | O       | P       | Q       |
|-----|--------|--------|---------------------------------------------------------|---------|---------|---------|---------|
| 1   | Prom** | TFBS** | Association (reference)                                 | MAF_CEU | MAF_YRI | MAF_JPT | MAF_HCB |
| 674 |        |        | p=0.040 (Duan et al. 2004), haplotype (Pae et al. 2006) | 0.07    | 0.13    | 0.07    | 0.03    |
| 675 |        |        |                                                         | 0.20    | 0.25    | 0.33    | 0.14    |
| 676 |        |        | p=0.001 (Duan et al. 2004)                              | 0.42    | 0.50    | 0.35    | 0.33    |
| 677 |        |        | p=0.003 (Duan et al. 2004), p=0.010 (Pae et al. 2006)   | 0.17    | 0.43    | 0.27    | 0.12    |
| 678 |        |        |                                                         | 0.12    | 0.00    | 0.04    | 0.06    |
| 679 |        |        |                                                         | 0.07    | 0.36    | 0.09    | 0.08    |
| 680 |        |        |                                                         | 0.09    | 0.26    | 0.18    | 0.11    |
| 681 |        |        |                                                         | 0.01    | 0.38    | 0.01    | 0.03    |
| 682 |        |        |                                                         | 0.39    | 0.00    | 0.44    | 0.46    |
| 683 |        |        |                                                         | 0.03    | 0.24    | 0.16    | 0.10    |
| 684 |        |        |                                                         | 0.03    | 0.38    | 0.09    | 0.01    |
| 685 |        |        |                                                         | 0.02    | 0.00    | 0.00    | 0.00    |
| 686 |        |        |                                                         | 0.22    | 0.14    | 0.16    | 0.10    |
| 687 |        |        |                                                         | 0.01    | 0.00    | 0.05    | 0.01    |
| 688 |        |        |                                                         | 0.35    | 0.00    | 0.05    | 0.08    |
| 689 |        |        |                                                         | 0.29    | 0.03    | 0.02    | 0.04    |
| 690 |        |        |                                                         | 0.44    | 0.35    | 0.33    | 0.49    |
| 691 |        | Y      |                                                         | 0.20    | 0.08    | 0.26    | 0.17    |
| 692 |        |        |                                                         | 0.15    | 0.12    | 0.26    | 0.12    |
| 693 |        |        |                                                         | 0.09    | 0.00    | 0.24    | 0.37    |
| 694 |        |        |                                                         | 0.11    | 0.44    | 0.27    | 0.27    |
| 695 |        |        |                                                         | 0.16    | 0.15    | 0.36    | 0.47    |
| 696 |        |        |                                                         | 0.01    | 0.00    | 0.23    | 0.11    |
| 697 |        |        |                                                         | 0.38    | 0.33    | 0.30    | 0.43    |
| 698 |        | Y      |                                                         | 0.03    | 0.00    | 0.00    | 0.00    |
| 699 |        |        |                                                         | 0.15    | 0.00    | 0.00    | 0.00    |
| 700 |        |        |                                                         | 0.38    | 0.04    | 0.08    | 0.11    |
| 701 |        |        |                                                         | 0.03    | 0.45    | 0.38    | 0.29    |
| 702 |        |        |                                                         | 0.49    | 0.06    | 0.46    | 0.47    |
| 703 |        |        |                                                         | 0.03    | 0.00    | 0.41    | 0.34    |
| 704 |        |        |                                                         | 0.04    | 0.00    | 0.00    | 0.01    |
| 705 |        |        |                                                         | 0.03    | 0.24    | 0.00    | 0.00    |
| 706 |        |        |                                                         | 0.32    | 0.00    | 0.09    | 0.09    |
| 707 |        |        |                                                         | 0.32    | 0.45    | 0.38    | 0.37    |
| 708 |        |        |                                                         | 0.12    | 0.45    | 0.28    | 0.29    |
| 709 |        |        |                                                         | 0.41    | 0.47    | 0.38    | 0.37    |
| 710 |        |        |                                                         | 0.37    | 0.07    | 0.01    | 0.02    |
| 711 |        |        |                                                         | 0.03    | 0.16    | 0.31    | 0.28    |
| 712 |        |        |                                                         | 0.28    | 0.35    | 0.40    | 0.47    |
| 713 |        |        |                                                         | 0.37    | 0.27    | 0.23    | 0.21    |
| 714 |        |        |                                                         | 0.21    | 0.06    | 0.46    | 0.49    |
| 715 |        |        |                                                         | 0.08    | 0.48    | 0.10    | 0.09    |

Key appears on page 109.

|     | R                                                                                                                                |
|-----|----------------------------------------------------------------------------------------------------------------------------------|
| 1   | Sequence                                                                                                                         |
| 674 | GGTTACCATATAGCATTGATTCATTAATTGATGCCTTTATGGGCTTTATAACCCCTGCCT[A/G]TATTTATGAGATTTGCTGTTGGTGTGCTTATTATAACTCAGCCATGAATCCTTTGATTTA    |
| 675 | AGGTTTTAAAGAACAGTTTCAGCAACCATGAATTTGTTTTCTGAACATATAAAGCAGTTG[T/G]ATAGACGAAGTTCCAGGATACCTTTAAAATTACCAAGCGAAATGAGTTTTAAAAATCAAG    |
| 676 | TCTATGTCCTTTCTCCCAAATCCATAACCCCATGTAGTCATGAGAAAAATGTCAGAC[A/G]AAACTTTATCGGGAATATCTGCATAATATTTGATCAGTATTTCTCAAAACTGTCAGTCA        |
| 677 | AGATATTTAGCATTAGATTTCTCATAAAGTCAGTGCCTTTGATAATTTTAGATCA[T/C]AGTCACATTGAAATATGCTGAAATCTATGTATTCTTTCTCTAGAAAAATGCACACAATCA         |
| 678 | CCATTAACAATTTTTCTGAGAATGAGAAAATTCATCCAAAATCAAAGTTATCCAAAA[T/C]CATGACTTTCAATTCCTAACATGTCGTGTTAACTTTATTATTCTTTCTTTATAGATATC        |
| 679 | TCTGTTTTTTAAAATTCTGACGAAGTGATATATTTCTATTCAATTTCTAGTTACAGCCAGA[A/G]ACTAGAGAAAAATGATTTTCAGAACCAAAAAATTTCTGCTTTATATTTTTGTGGAGACCTT  |
| 680 | TTATATGTGCTCTTCAAATTAGCTTTACTAAATTCACCAATTTTATGTGTTATTTGATG[C/G]ATTTTGATAACTCTACGCAGTGACATAAGCACCAAAAGCAATCATGATGTAGAATGCTTGC    |
| 681 | CTTTACAAGTGAAGAGGCTAAGGCTTCAAGAAGTTACATGACTTGCCTAAAAATCACATA[A/G]CTAGTAAAGTATTGTGCCACTTGTAAAGTTGTGCAACTTGTAAAGTTGAACCCACAATGTCT  |
| 682 | TATATTGCAAGCTCTTTGTTGTAATGCCGCTCTATCTGAAGGCCTAGAATATTTCCCTT[T/C]TCCATTTCCCTCCTCTTTAAAAAAGAATTTACAGCACACCAGACATGAGAGACTTTGT       |
| 683 | TAAAGTGATAAATTGTTCTTTGTTCTCAAGTTAATTGCAGTCCCTATGCCCTGTTTAC[A/G]CTTTAACGACTCCCAATGGGAGCAAGCAAACAAAATTTGAAAAATATAAATTTAATTGTA      |
| 684 | CATGCACATTTTCTACATAATGGATTGTATCCCTTTCTCTATTTTACTCATTACTT[C/A/G]TTTACATTTAGTTGTTTGAAGCAAGTTCTCATTCTCTCACTCAGGCAGGAGTGCAGTG        |
| 685 | CTCTTGACCTAGAGAGGCTTGCATCTCTTTGGGCAAAATCAAACAGATC[A/G]CATACATGAAATAGACAAATAACAATAGAGGACAACGAGTTTTTGCAGGG                         |
| 686 | TCCAACCTCTCCCACTCCACATCCAAACTGATTGTGAGGTGATTAGTCCATTCTTAAGCT[C/G]CTATAGAGACATACCCAAGACTGGGTAATTTATAAAGAAAAAGAGGTTAATGGATTTAC     |
| 687 | AATCATTCTGCCTTCACTTTAGATTCTGTGAGCTTTCAGGGGGCACTACTGAAAAATCA[A/G]TGCCAGGTATGTACTTAGAGAAGCTTCTGTTAATGGTTTTCTGTTGACCTAGCCCATAG      |
| 688 | GCATTTGTTTTATCAACAGATGTTACTAAGACCTCCTTGCCCTGTGTGCTCTTGATAACAT[T/C]AATCTTCTAAATTTCTGGGATAGATATTGACTAAAGTTTCACTAGCCATGAGTTTTTATT   |
| 689 | ATGAAAAATAGAGATACTCAGAAAGGACATACCATTGCTTGGGATTCAAAGAGGACCATAA[T/C]AGCATAAATTTGAAGCTTTCTTACATATCTAAAGGAAAGCATCCTTCCATACCCATA      |
| 690 | ATGTGAGTAATTTCCATTTTCAATTTCCAGGAATTTTTGTGTTTTATTTTACAGATTACATTA[A/T]TACAGCTTCTCACATACAAAGAAGGCTTTGCTGCAATGCTGGCTCTAGAATGTCTTTTTT |
| 691 | GAGTGATATCCAAGTGAGAATTAAGTGTGGGCTGCTGGCTCACACTCATCCTGTTGATCA[A/G]TGACACTAATCTACACCTCTGATATCTTTCCATTTTAGATTCATTAGAGCTATAGAACCT    |
| 692 | TCATTTTCCGTTTCTTACCTAGTCCCTTGTATCTTTTGAAGTGGCATTTTTTTCTACA[A/C]AAGACAGCGTCCCACTTTTCTAACTATTTTTCAGGAGCTATTTGGAGGGTGGGTGGGGCAA     |
| 693 | TAGCAGTCATAACAGCAATGTCTAGAATCTCCGAGTGTGATAGCCAAGGGCCCAAGAC[A/G]CAAGTACAGCCAAAGAGAGTCTGGGGCAACAGATAAAATCTGAACAGTGTATGCAAGCA       |
| 694 | ATATCATTAATTTATCCACAACCACTATGAGTAATGCCACACCTTCCCACTCCCACTC[A/T]GACCTATATCTGTGCTGTTCTTGGTCACTGAACCTTTTTGTTATTACCTCAGATCCAG        |
| 695 | TGATACTATGGGGAGGGAGCATAATTTCAAGTGTAAATTAATAAGTCTGAGTCTAGAGGG[T/G]TGACTATGAAGATAGAAAGGATAAATTTTCACTTACAGATATTATATGGCAAAAGTACAC    |
| 696 | ACCTAGTAATAAATCATAGAGAGGCACAACCATATACAATCCATCTGGAGATGCTCAAAG[A/G]TTTCTTTTGAATTTTATCAATGTCCCATACATTTTTTCCAAATTAATTTAATTACAAA      |
| 697 | ATTCAACTAATTCAGGAGGTCTAAGCCTACCTACAGAGGGAGAGAAATATGGTCTTTTT[A/T]GTTAGTTGTTGAGTCTAATTTTCAAGACTATTTGAAAGTTTCCCTAAAGTTTTTCTTCTCATCT |
| 698 | CCGCTCCAACACTTTCTCAACATCTTCCGAAGAAAGAAGGCAGGGCCAG[A/G]GAATGCCAAGTGAGTTATCTGACCTGTTTGTCTCTTTTCTCTTCTTCTT                          |
| 699 | GTAATTTTTCTATAAATCACAAGGTGCAATAAAGGTTTTTGTGAAGTTTTCATCATCATGT[A/G]TAAGCTTTAGGGGAAGAAACTGACTTATAGAAAAGACCAGTTAATAGAGTGCCACAGTAAT  |
| 700 | GCAGTAGACAAAGGTTATCAAAAAGAATGTGGGAAATAAAGGATGCAATATTATGAAA[A/C]CAAGGAGACCTTGTATTAATGCGCTCAGGTTGTCAAAAACAAAATACCACCAACTGAGCTG     |
| 701 | TCTAGAAAAGTGGGATATGCCTTAGCCTTATGCATTCAATATATTGCTGCTATAAAAAAT[A/G]GAGGAGCTGTAAAGTCTGCTGGAAGTGGAGGCATGCTACTGTTACTCCGTGTGAGATGTGT   |
| 702 | CAATTTCAACATGTTTGTCAAGTTCTGTACAATTACATTGCAATGTAGGCGAAATCTC[A/G]GTACCTCTCCTGTGATCCTTTTTACTCCTTATATGTTAATGTTAATTCTAATCTCCC         |
| 703 | TCACCCTAAGCATCTGTACCTGAAATTTCTTTCTATGACAGGCAGCCCGCTTATGTGGC[A/G]TGACAGCCAGACAGCTTTATCCCATCACCTTCTGCAGTGTAGCTGACTCATGGGAAATG      |
| 704 | ATGTGGCACCGCCTCTCTGTGCACGTGAAGACCAATGAGACGGCCTGCAACCAACAGCC[A/G]TCATCAAGCCCTCACTAAAAGTTACCAAGGCTCTGGCAAGAGCCTGACCTTTTCAGATA      |
| 705 | CATTGGTTCCCAAAACAAAGGAGTCTCTGTTATTACATTTTCTGCTATGAGATTCCTGC[A/G]AAGTAGGGCATTCCCAAGTATCACTTGAAGAGAGAATATGATGGTACAAGGACCACACG      |
| 706 | ACTTCTTGGGCTAACTTTGATTGTAAGTCTCTGAACAATCAAAGCCTGTGAGGAGACAGC[T/C]AACCTTCTTATTCTTCTATGTCAATAGTGAACAATTGCAGATCCCCTTTCTTTCTTCTC     |
| 707 | TGTTTTAACCTAAATTAACAAGTAAATTAATTTGAAATATGCCAACCTTTAAAAGT[T/C]TTGTTTATTGTTTGTCTTTTGTAGTAAAGACAGCTTGGATCTGCGTGGCTGTGGGATGCTC       |
| 708 | TTGAACTTAAGAAAATCAAATGATGCATTGGCTGCCTCCTATTTATTACATGCTGCTCA[T/C]AGGCATAACAGCATAGTCTAACAAGTATAAAACCTGTGTAAGTGTAGCTTTTCAAGTGCAGT   |
| 709 | CTGGATAGCTCCTTTAACAGCTGTGGCCGGTAAGCAGGCACTTATTTGCTAAAGAATCA[A/C]GCCCATTTAGCTGGCTTTCATCTGCTTTGTAGAGCTCTGTTAAAAAGAGTTCTATTTCTC     |
| 710 | TACTACACTATGTCAGCACTATATAGGTTATCTTGTAACTGCTTGCCTGGCTATTTGGC[T/C]GAAAAATAACAACATGTAAGGAAAAATCTATTTTATAAGTCTAACATTTACTTTGTAA       |
| 711 | AATCATGTATTAGGAAGTACAGAGTGAATGAGTAGAGAATTTCTAAATTAGCACCCAAAGG[T/G]TGGGTGGCTAGATTATGTTTATAAATATGAACCTTTTGTATTAAGTGAATGATTTAAAAG   |
| 712 | GCAATACTTTGACTTATATGACAAGGATGAAATGCACAGTCCAACCTCCCAAGCCACAACG[A/G]TACAAGGGAACAGAAGTCTTGTCTGCTTACACTCTGAGAAAGATATTGACTTTCTGCA     |
| 713 | ACTTCTTAGTCTAAATTCAGGACATTTCCCAAGATATGTAAGAATTTAGACTTATGCA[A/G]ACAGACTTTATAAAAACATGCCAATATTTATTAGTTTGTGAATTTTAAATTTCTGCTCCC      |
| 714 | TAAATAAATAAATAAATAAATAAAGTAAACGGATTCAATTTAGTGTTCAGAAAGGATACTGA[A/G]GGGAGGGAAGGGCTGATGATGGTGTACCTGCTGATTGTAATAGGGAAAAGCCCGTTTCT   |
| 715 | AAGGGTTTATCTGTTTGTACAATTTCTTTTGCAAAAATAAATGATTCTTGATATGATG[T/C]AAGGACTTTTTCCGTAGATAGAACCTATAAAATGCAGAAGTTTGGGGCAGTAATTATATG      |

Complete list of all 94 genes and 1,536 SNPs present on the COGS SNP Chip

|     | A        | B         | C          | D                                          | E         | F     | G          | H             | I      | J      |
|-----|----------|-----------|------------|--------------------------------------------|-----------|-------|------------|---------------|--------|--------|
| 1   | Cytoband | Gene Name | Gene Alias | Description                                | Size (kb) | Chrom | SNP ID     | Position (bp) | htSNP* | Coding |
| 716 | 6q25.1   | ESR1      | NR3A1      | estrogen receptor 1                        | 295.7     | 6     | rs4870062  | 152279311     | T      |        |
| 717 | 6q25.1   | ESR1      | NR3A1      | estrogen receptor 1                        | 295.7     | 6     | rs3020377  | 152314091     | T      |        |
| 718 | 6q25.1   | ESR1      | NR3A1      | estrogen receptor 1                        | 295.7     | 6     | rs3020317  | 152320434     | T      |        |
| 719 | 6q25.1   | ESR1      | NR3A1      | estrogen receptor 1                        | 295.7     | 6     | rs1884051  | 152324972     | T      |        |
| 720 | 6q25.1   | ESR1      | NR3A1      | estrogen receptor 1                        | 295.7     | 6     | rs985694   | 152328318     | T      |        |
| 721 | 6q25.1   | ESR1      | NR3A1      | estrogen receptor 1                        | 295.7     | 6     | rs1884052  | 152333059     | T      |        |
| 722 | 6q25.1   | ESR1      | NR3A1      | estrogen receptor 1                        | 295.7     | 6     | rs1884054  | 152333259     | T      |        |
| 723 | 6q25.1   | ESR1      | NR3A1      | estrogen receptor 1                        | 295.7     | 6     | rs3020407  | 152348954     | T      |        |
| 724 | 6q25.1   | ESR1      | NR3A1      | estrogen receptor 1                        | 295.7     | 6     | rs7757956  | 152358833     | T      |        |
| 725 | 6q25.1   | ESR1      | NR3A1      | estrogen receptor 1                        | 295.7     | 6     | rs9340949  | 152360403     | T      |        |
| 726 | 6q25.1   | ESR1      | NR3A1      | estrogen receptor 1                        | 295.7     | 6     | rs9340954  | 152361865     | T      |        |
| 727 | 6q25.1   | ESR1      | NR3A1      | estrogen receptor 1                        | 295.7     | 6     | rs3020368  | 152412883     | T      |        |
| 728 | 6q25.1   | ESR1      | NR3A1      | estrogen receptor 1                        | 295.7     | 6     | rs7764672  | 152434661     | T      |        |
| 729 | 6q25.1   | ESR1      | NR3A1      | estrogen receptor 1                        | 295.7     | 6     | rs13192678 | 152447603     | T      |        |
| 730 | 6q25.1   | ESR1      | NR3A1      | estrogen receptor 1                        | 295.7     | 6     | rs3778090  | 152449721     | T      |        |
| 731 | 6q25.1   | ESR1      | NR3A1      | estrogen receptor 1                        | 295.7     | 6     | rs2474148  | 152454597     | T      |        |
| 732 | 6q25.1   | ESR1      | NR3A1      | estrogen receptor 1                        | 295.7     | 6     | rs3020383  | 152458472     | T      |        |
| 733 | 6q25.1   | ESR1      | NR3A1      | estrogen receptor 1                        | 295.7     | 6     | rs1543403  | 152470397     | T      |        |
| 734 | 7p15.3   | SP4       | SPR-1      | Sp4 transcription factor                   | 86.5      | 7     | rs2073535  | 21432682      | T      |        |
| 735 | 7p15.3   | SP4       | SPR-1      | Sp4 transcription factor                   | 86.5      | 7     | rs2282888  | 21442657      | T      |        |
| 736 | 7p15.3   | SP4       | SPR-1      | Sp4 transcription factor                   | 86.5      | 7     | rs10233357 | 21456570      | T      |        |
| 737 | 7p15.3   | SP4       | SPR-1      | Sp4 transcription factor                   | 86.5      | 7     | rs4722032  | 21458066      | T      |        |
| 738 | 7p15.3   | SP4       | SPR-1      | Sp4 transcription factor                   | 86.5      | 7     | rs3807643  | 21476387      | T      |        |
| 739 | 7p15.3   | SP4       | SPR-1      | Sp4 transcription factor                   | 86.5      | 7     | rs2282896  | 21479247      | T      |        |
| 740 | 7p15.3   | SP4       | SPR-1      | Sp4 transcription factor                   | 86.5      | 7     | rs6943809  | 21484906      | T      |        |
| 741 | 7p15.3   | SP4       | SPR-1      | Sp4 transcription factor                   | 86.5      | 7     | rs1011168  | 21496283      | T      |        |
| 742 | 7p15.3   | SP4       | SPR-1      | Sp4 transcription factor                   | 86.5      | 7     | rs3807641  | 21496629      |        |        |
| 743 | 7p15.3   | SP4       | SPR-1      | Sp4 transcription factor                   | 86.5      | 7     | rs12668354 | 21498416      |        |        |
| 744 | 7p15.3   | SP4       | SPR-1      | Sp4 transcription factor                   | 86.5      | 7     | rs12673091 | 21504592      | T      |        |
| 745 | 7p15.3   | SP4       | SPR-1      | Sp4 transcription factor                   | 86.5      | 7     | rs1018954  | 21516416      | T      |        |
| 746 | 7p15.3   | SP4       | SPR-1      | Sp4 transcription factor                   | 86.5      | 7     | rs11974306 | 21523887      |        |        |
| 747 | 7p14.3   | CRHR2     | CRF2       | corticotropin releasing hormone receptor 2 | 47.5      | 7     | rs2240403  | 30661727      | T      |        |
| 748 | 7p14.3   | CRHR2     | CRF2       | corticotropin releasing hormone receptor 2 | 47.5      | 7     | rs2190242  | 30676000      | T      |        |
| 749 | 7p14.3   | CRHR2     | CRF2       | corticotropin releasing hormone receptor 2 | 47.5      | 7     | rs2284217  | 30680133      | T      |        |
| 750 | 7p14.3   | CRHR2     | CRF2       | corticotropin releasing hormone receptor 2 | 47.5      | 7     | rs2267717  | 30683568      | T      |        |
| 751 | 7p14.3   | CRHR2     | CRF2       | corticotropin releasing hormone receptor 2 | 47.5      | 7     | rs4723002  | 30692226      | T      |        |
| 752 | 7q21.12  | GRM3      | MGLUR3     | glutamate receptor, metabotropic 3         | 221.0     | 7     | rs2073549  | 86111520      | T      |        |
| 753 | 7q21.12  | GRM3      | MGLUR3     | glutamate receptor, metabotropic 3         | 221.0     | 7     | rs701332   | 86115570      | T      |        |
| 754 | 7q21.12  | GRM3      | MGLUR3     | glutamate receptor, metabotropic 3         | 221.0     | 7     | rs274614   | 86116023      | T      |        |
| 755 | 7q21.12  | GRM3      | MGLUR3     | glutamate receptor, metabotropic 3         | 221.0     | 7     | rs724224   | 86163556      | T      |        |
| 756 | 7q21.12  | GRM3      | MGLUR3     | glutamate receptor, metabotropic 3         | 221.0     | 7     | rs1527765  | 86173887      | T      |        |
| 757 | 7q21.12  | GRM3      | MGLUR3     | glutamate receptor, metabotropic 3         | 221.0     | 7     | rs2189816  | 86179382      | T      |        |

Key appears on page 109.

|     | K      | L      | M                            | N       | O       | P       | Q       |
|-----|--------|--------|------------------------------|---------|---------|---------|---------|
| 1   | Prom** | TFBS** | Association (reference)      | MAF_CEU | MAF_YRI | MAF_JPT | MAF_HCB |
| 716 |        |        |                              | 0.28    | 0.40    | 0.44    | 0.40    |
| 717 |        |        |                              | 0.30    | 0.23    | 0.21    | 0.19    |
| 718 |        |        |                              | 0.12    | 0.23    | 0.40    | 0.39    |
| 719 |        |        |                              | 0.30    | 0.42    | 0.50    | 0.46    |
| 720 |        |        |                              | 0.12    | 0.13    | 0.49    | 0.42    |
| 721 |        |        |                              | 0.09    | 0.03    | 0.35    | 0.30    |
| 722 |        |        |                              | 0.29    | 0.08    | 0.28    | 0.32    |
| 723 |        |        |                              | 0.28    | 0.09    | 0.31    | 0.40    |
| 724 |        |        |                              | 0.19    | 0.33    | 0.11    | 0.03    |
| 725 |        |        |                              | 0.02    | 0.00    | 0.08    | 0.14    |
| 726 |        |        |                              | 0.28    | 0.39    | 0.44    | 0.47    |
| 727 |        |        |                              | 0.13    | 0.13    | 0.13    | 0.02    |
| 728 |        |        |                              |         |         |         |         |
| 729 |        |        |                              | 0.08    | 0.47    | 0.22    | 0.36    |
| 730 |        |        |                              | 0.04    | 0.10    | 0.21    | 0.31    |
| 731 |        |        |                              | 0.36    | 0.35    | 0.38    | 0.48    |
| 732 |        |        |                              | 0.10    | 0.01    | 0.14    | 0.03    |
| 733 |        |        |                              | 0.45    | 0.46    | 0.22    | 0.44    |
| 734 |        |        |                              | 0.01    | 0.00    | 0.10    | 0.08    |
| 735 |        |        |                              | 0.33    | 0.08    | 0.08    | 0.11    |
| 736 |        |        |                              | 0.04    | 0.36    | 0.35    | 0.41    |
| 737 |        |        |                              | 0.07    | 0.00    | 0.00    | 0.00    |
| 738 |        |        |                              | 0.03    | 0.09    | 0.19    | 0.10    |
| 739 |        |        |                              | 0.02    | 0.16    | 0.48    | 0.48    |
| 740 |        |        |                              | 0.21    | 0.27    | 0.19    | 0.18    |
| 741 |        |        |                              | 0.35    | 0.04    | 0.07    | 0.03    |
| 742 |        |        |                              | 0.04    | 0.10    | 0.48    | 0.47    |
| 743 |        |        | haplotype (Zhou et al. 2009) | 0.30    | 0.08    | 0.09    | 0.10    |
| 744 |        |        | haplotype (Zhou et al. 2009) | 0.31    | 0.47    | 0.17    | 0.21    |
| 745 |        |        |                              | 0.44    | 0.27    | 0.08    | 0.11    |
| 746 |        |        | haplotype (Zhou et al. 2009) | 0.48    | 0.13    |         |         |
| 747 |        |        |                              | 0.08    | 0.11    |         | 0.17    |
| 748 |        |        |                              | 0.20    | 0.23    | 0.42    | 0.48    |
| 749 |        |        |                              | 0.19    | 0.39    | 0.41    | 0.47    |
| 750 |        |        |                              | 0.10    | 0.22    |         |         |
| 751 |        |        |                              | 0.07    | 0.18    | 0.20    | 0.14    |
| 752 |        |        |                              | 0.01    | 0.00    | 0.06    | 0.00    |
| 753 |        |        |                              | 0.23    | 0.27    | 0.06    | 0.05    |
| 754 |        |        |                              | 0.38    | 0.42    | 0.19    | 0.14    |
| 755 |        |        |                              | 0.44    | 0.08    | 0.25    | 0.21    |
| 756 |        |        |                              | 0.08    | 0.02    | 0.11    | 0.10    |
| 757 |        |        |                              | 0.17    | 0.00    | 0.00    | 0.00    |

Key appears on page 109.

|     | R                                                                                                                               |
|-----|---------------------------------------------------------------------------------------------------------------------------------|
| 1   | Sequence                                                                                                                        |
| 716 | AGAGACCTAGACACAGTTCTTATTAAGAAATTTTTAATTTAGGTGGCATAATTCAGAGA[T/G]AAATTCCTGCTTGGGGCAATAGGTACCTCCTTTGGAATAAGCATGGTGAGAAAGAATTG     |
| 717 | TTTGAATTCATCCTGGTATGCTGTGTGAGCTGGGGCTCCAATGTCGTTTTCTACAGATG[A/G]CTCCACAGTTGTTTCGGTTTTCAATCGAACAGCCTCCTACAGAAGTATTTTTCAGACTTCT   |
| 718 | TGTTACAGTTAAGAAAAAATTCTAGGTATTGACCCCTGCCAGTTTTCGGAGTTAATA[T/C]TAAC TAGTGATTTGGGGTACATTTAAGTGCTTTAAGCTATCCTACAAGCTTAAAGTAGT      |
| 719 | GGGAGTAGGATCCACTAGCTTGCTGCTTGTCTTATAAATTAGGATCAAGAGCTTCCGCC[A/G]TCTTCTAGGCATTGCTGCTTCAAGGGAGTCTCTGAGATTGGGTTCTGCATGGATGTAT      |
| 720 | TCTTCTCATCCACTCTATCTCATTACCTAAAAGGTTATCCTTAGAGCTTTATAATAACATA[T/C]CCCTGAAGTTTAGATCATTTTATTGCCTCCCAATTGTTGAGAGTAAGGAATTTAGTACAT  |
| 721 | TACTGGCTTAGCACAGTGCTCGGCATTACAGTAAATAAGGTTAAGGAAGGCCAGTGATATA[C/G]AGTAGTAGAAAACAGCAGTTAATGAAGGCTTGCTTCTGTCACAGGTTCTCTCCTCCAG    |
| 722 | CCCTCCACACAAGCATATACAAAATTTATGAAACAGACAAAATTTGTAGGGAAGCAAAT[A/C]CCTTCAAGGTTGAGTCTTTCTGGTCTTCTAGAAGGTAAGCTTGGTGATGGGGCAGTCACA    |
| 723 | GTTGTGTTTTGATGTGTGTGGTCTGGGTGAGCGGCTCAGTGCTGCTGCTGTGGAGAAGGC[A/G]TGATATGGAAGGGATGTGACTGTCCTTCTTCATCTTCATAACGGGGCCAGGACTGGGGTG   |
| 724 | GCTTTCTCATGGTGTCTCCACTATGAAGTAGCTGAGCTGAGATCTCACCAAGGCCCTGC[A/T]GGGTTACAGCCACACTCTTAAGTACTCACAGCTGCATCACACTGAATATCATCTCCCTGC    |
| 725 | GTAGGTACTTCAAATGGACAAGTATAACACATTATGACTGCTAATATGGATGCATTGGGA[A/G]GAAAAAAGCCCTAAGAAGCAATATGCAGAAAAGCTATGATTGCTGGAGACAGATAGATC    |
| 726 | GAGTTACATCATCTGTTCCAAACACCCTTGAATGGTTGTATCAGCGTCAATGTCTGAGT[T/G]GCTGCTCTGGTCTCTCTGGCCAGTCTCAGCTGGCCATGCCTGTTCCAGGCACCAGAGAAA    |
| 727 | CTTTTTGCTTTTGTCCCCCATTTCACTGGAAATCTATCCACTGGGCACCCTGTTGGT[T/C]GGCTTCTTTCATAGATTCCTTTATGTTTCAAATTTAAAAAGACAATAATAGCAACAAA        |
| 728 | acacgtaagtattctcttcaggattataataacattgtttgcatTTTTcata[T/C]atctttgtcactttcattgttactttgtatattgtctagaaattgattgtctggtg               |
| 729 | AAAAACAGTTATCAACATGAAAACCTTTTTTCAGACAAAAGTTCTACAAAAGTCTATTTCT[T/C]ACAAGTAGGACTTTGGCAAGGATTGTGCAACTGACAATCAAAGTCATTTATCCGTGGT    |
| 730 | TTATACACACTAGTCTAACAATACACATTTGCTCAAGGATTGGGTTACGAGCAGGCTCTT[T/C]ACCTTTCAGGTGAACAATTACACATCAGGAGAAGGATGGAAGTTTCTATCTATGAACAA    |
| 731 | GTGCGTGAGGTCCCAGCACGGTGTGCCTTACACCGTGCAAAACAATAAGAAGAGAAGAGA[T/G]GCACACATGTCACCTTTCAGGCAGGGACATCCAAGCTGTTTGAGTCTCCATCTGTGAT     |
| 732 | CTCATGTCCACTGACATTTTATTGGCCAAGCAAGCATGTGGGGTGTCCAGAGTCAAAGAG[C/G]GACATGTTGCCGGGGTCACTGACTATTTCTGAGCAATAATCTAACCTATCATAGCTCAGAT  |
| 733 | ACTCTAATCTTTAAACATGGTTTCTTTCAGATATTTAAGCATATTTATAATAGCTACAT[C/G]AAGTCTTGTCTAAATCCAGCATCTGGGAAACACATAGTTTCTTTTGACCTCTGCTATTCC    |
| 734 | CAGGAGACAAAAATGCCAAGGCTGAGTGTGAAGCCCAGGTAAAGAGTGAGACAATGGCT[T/C]TGAGCCTGGGGTGAAGCATGCCTTGTTCCTAAGGCCAGTATTTACATGTGGGGTCACTT     |
| 735 | GTTGTAACCTTTTGATACTGCTGCTAAAGTCTATTTATAAAGGCATTTTGTGTTTTACT[A/G]TTTGAAGTGAAAGCAGAAATATGGGTGCAAGATTCTGCACTGCTACATTAAGTCAATCCT    |
| 736 | TTTAGGGGGCTTTTTTGGTGGGCATAGTAATATTGAGGTAATATACATGCTTTGGGGT[G/A/C]AATAGGTTTCTGTTATATTCTTTTATTGGCCTTCAATAAGTATTGGATCCAGTTTG       |
| 737 | GAATTCTGAGACTCCCAACATGCCAGGCAGGTGGCTGCAGTCAAGCAGCTGTAGTCATG[C/G]CGGCTGAGACCTGGGTGCGTGGGGTGTACCAATTCCGATACATGCCAGAATTAGAA        |
| 738 | AAGAAAGAGGCCATCTGTGTGGTTTTATGTCAATTTGCTTTGGCTACCAAGGTTCTG[A/G]CACACTGAAAGTACTTAATGAATGTTTCTTAAATAAAGCGAATGATAATCTAAAATCTAT      |
| 739 | TAAATGTTATTGAGCACGAAAAGTGAGATGATCAGAACACTACTTTTTATTTTTCTGGCA[A/G]CAGTGTGAAGGATGAGAAAGGAGGGAAAGCTCAATTTAGTTGGTAGAGGCACAGATTGA    |
| 740 | TTATTTTTTCAATTATGGAATTGCTCTTTATATATTCTACATACAAAATCCTTATCAGAT[A/G]TACAATTTGAAAATATTGCTCCTGGCTGGGCGCAGTGGCTCACGCCTGAATCCCAGCA     |
| 741 | CTCTGGACAAGTTTACTTATTGTTTTTAAAGTATCTAAATGAGGACAATGAAAAGCAA[A/T]CTATAGCAGGCAATTGAGAAATGAAGTGAAACTTGAATTTGAATAACAGTGTATCATAT      |
| 742 | GTTCTGCACTTACACCACGACTGGGACCACCTTACAGAGTAGAAGTGGCAAGACAGAAAAA[T/C]GATGTTGATTTACCTCAGATTTCTTGGAAAACAGACTCTATTTTCTAGTTCCCTTAGCCA  |
| 743 | ATATATTTTGAAGTTAGATATATACCAACCCTACAGAGAGGGTGGGTGGAGATACTC[A/C]CCTAAATGTCTCCTATATATAGGACTGATAATTATTATAGACTTTAATAATTTTGTAAAT      |
| 744 | ccaagggcaactATCTACTTTTACCCCCAGGTAAATGATACTGGAAAATGTAGGGTACTC[A/G]TGAAGGACTTTAGATATTCTAGGCCGCGTAGGTAAGAAAAGAGTGTAGGAGGGACTGATA   |
| 745 | AAACAACATTTAGTCCCTTAAAGTAACAATTTAGAGGGAAGATCTACGGCTAACAGTTA[A/T]TCAATTGTGCACATCAGGATAAACCCAGTTAACCAATTTTATGATATGCCTCATTATTTATAC |
| 746 | AAACCAATTACTGAAAAACAGAAACAGCTGCTCATGTGTTTCACTAACTTTTGGGGT[A/T]TATGTGTGGATGATTTTCTATATTTAAAAGCATTCTCTATATTTAGAAATATATGTGTTA      |
| 747 | AGAGCAGCCTCAGGAAAGCTCACTGTGGGGCCCCATCTGGTGCAGGCCCCACCTGGAA[T/C]GACTGCAGGAAGGAGTTGAAATAGATGAACATGATCTGTGACAGGTCGCTCCCCGGGA       |
| 748 | tccagcctaactgtctgacctctccagcattctACATGGCCACTGGCATTGGCACA[A/C]ATAGGTTTGGCACATACCCTCTTTGTGTGGATCCACCCTTAAAGCACCTCTCTCTT           |
| 749 | TGGGTGGGAAAGGCATCCCCAGGGCCCTTTGCTGGTGTCTGGGATTCAGGCCAGGGA[A/G]CTTGGATTCCATTTCTAGTGTTATATGGACACAGCTCTCTGAGCCTCGACTGCCTGTTT       |
| 750 | GGGAGAGGTGGGAGGAAAATGGAATATAAGTGCCCACTTCTGGCCAAACCCTCCAT[A/G]CTAATCCACTTCTTTTGGCCTACAGACAGGGAGACAGGCCACAAAAGGGATGAGACTT         |
| 751 | TATTGCAAAGAAGGTTTCTCATGATCATCGTCCCCATCCTCACCTCCTGCTTCATTTG[A/G]AAGGCCCTCCAGAACAATGTGCACTACCAGAAACCATTCGCTATCTCTGTTCTCTGTTT      |
| 752 | AGTCGGCAATCTACCCTGGCTTTTCGTATAAAAAATCCTCTCGTCTAGGTACCCTGGCTC[A/T]CTGAAGACTCTGCAGATATACCCTTATAAGAGGGAGGGTGGGGAGGGAAAAGAACGAGA    |
| 753 | TGACCTATGTGAATATTAAGGTGGTACTTTCTGAGGAATGTTCTATGTGGATGCACATTA[T/C]GAGACATTTTATTGCAAATTTGTTTGAACAGAACCTGTCAACGCCACACTACAAGG       |
| 754 | TAAAAATAGAAAAGCCTGAAAAAATAAATAAAAAACAGGTTTTCACTTTGTTCACTT[A/G]AAATCTTGTTCACAGATCCGTGTGTAGGCTTCTTTAAGATTCTTAAAGCAATATCTTG        |
| 755 | TACTATTGTACATTTGTTTCTCCTACCTCTGACCTTCTGTTTCTCTTATAAGGAA[A/C]CTTGTAAATGCTTTGAGCCCACTTGATAATGCGGGATAATCTCCCATCACTCTTTCTTA         |
| 756 | AGGAGATGACACTAATGGAATGTAGAGTCAAAGGAGTGCAAGGCTCACATGGAAGCATA[T/C]GGATCCGGGAGCTAAGAGCCAAGTGCACAGTTGTTGAATGAGGGAGAGAGGAGGTTAC      |
| 757 | AAGAAAACCTCAGAGGTAGTCTTAACTTCTCTCTCCTCAAAGTCTAGTCTCAAATTC[T/C]GCTTACTTTACCTTTGACTTGCCCTTAACTCTCTTCACTCTGCTTCTCTATAAC            |

Complete list of all 94 genes and 1,536 SNPs present on the COGS SNP Chip

|     | A        | B         | C          | D                                  | E         | F     | G          | H             | I      | J         |
|-----|----------|-----------|------------|------------------------------------|-----------|-------|------------|---------------|--------|-----------|
| 1   | Cytoband | Gene Name | Gene Alias | Description                        | Size (kb) | Chrom | SNP ID     | Position (bp) | htSNP* | Coding    |
| 758 | 7q21.12  | GRM3      | MGLUR3     | glutamate receptor, metabotropic 3 | 221.0     | 7     | rs2214653  | 86183431      | T      |           |
| 759 | 7q21.12  | GRM3      | MGLUR3     | glutamate receptor, metabotropic 3 | 221.0     | 7     | rs2237548  | 86198886      | T      |           |
| 760 | 7q21.12  | GRM3      | MGLUR3     | glutamate receptor, metabotropic 3 | 221.0     | 7     | rs2237552  | 86211311      | T      |           |
| 761 | 7q21.12  | GRM3      | MGLUR3     | glutamate receptor, metabotropic 3 | 221.0     | 7     | rs6943659  | 86233862      | T      |           |
| 762 | 7q21.12  | GRM3      | MGLUR3     | glutamate receptor, metabotropic 3 | 221.0     | 7     | rs2282965  | 86239740      | T      |           |
| 763 | 7q21.12  | GRM3      | MGLUR3     | glutamate receptor, metabotropic 3 | 221.0     | 7     | rs6465084  | 86241411      |        |           |
| 764 | 7q21.12  | GRM3      | MGLUR3     | glutamate receptor, metabotropic 3 | 221.0     | 7     | rs10487052 | 86248625      | T      |           |
| 765 | 7q21.12  | GRM3      | MGLUR3     | glutamate receptor, metabotropic 3 | 221.0     | 7     | rs2237562  | 86260168      | T      |           |
| 766 | 7q21.12  | GRM3      | MGLUR3     | glutamate receptor, metabotropic 3 | 221.0     | 7     | rs1468412  | 86271387      |        |           |
| 767 | 7q21.12  | GRM3      | MGLUR3     | glutamate receptor, metabotropic 3 | 221.0     | 7     | rs2299222  | 86280340      | T      |           |
| 768 | 7q21.12  | GRM3      | MGLUR3     | glutamate receptor, metabotropic 3 | 221.0     | 7     | rs2299223  | 86285216      | T      |           |
| 769 | 7q21.12  | GRM3      | MGLUR3     | glutamate receptor, metabotropic 3 | 221.0     | 7     | rs2299227  | 86289908      | T      |           |
| 770 | 7q21.12  | GRM3      | MGLUR3     | glutamate receptor, metabotropic 3 | 221.0     | 7     | rs10952891 | 86305187      | T      |           |
| 771 | 7q21.12  | GRM3      | MGLUR3     | glutamate receptor, metabotropic 3 | 221.0     | 7     | rs10487055 | 86333978      | T      |           |
| 772 | 7q22.1   | RELN      |            | reelin                             | 517.7     | 7     | rs737373   | 102902878     | T      |           |
| 773 | 7q22.1   | RELN      |            | reelin                             | 517.7     | 7     | rs736707   | 102917639     | T      |           |
| 774 | 7q22.1   | RELN      |            | reelin                             | 517.7     | 7     | rs2528856  | 102930031     | T      |           |
| 775 | 7q22.1   | RELN      |            | reelin                             | 517.7     | 7     | rs2528858  | 102938847     | T      |           |
| 776 | 7q22.1   | RELN      |            | reelin                             | 517.7     | 7     | rs2075039  | 102949958     | T      |           |
| 777 | 7q22.1   | RELN      |            | reelin                             | 517.7     | 7     | rs2256504  | 102953131     | T      |           |
| 778 | 7q22.1   | RELN      |            | reelin                             | 517.7     | 7     | rs2237622  | 102957006     | T      |           |
| 779 | 7q22.1   | RELN      |            | reelin                             | 517.7     | 7     | rs10487160 | 102962491     | T      |           |
| 780 | 7q22.1   | RELN      |            | reelin                             | 517.7     | 7     | rs1008126  | 102962680     | T      |           |
| 781 | 7q22.1   | RELN      |            | reelin                             | 517.7     | 7     | rs362754   | 102969462     | T      |           |
| 782 | 7q22.1   | RELN      |            | reelin                             | 517.7     | 7     | rs362719   | 102973113     | T      |           |
| 783 | 7q22.1   | RELN      |            | reelin                             | 517.7     | 7     | rs362777   | 102977433     | T      |           |
| 784 | 7q22.1   | RELN      |            | reelin                             | 517.7     | 7     | rs362721   | 102978664     | T      |           |
| 785 | 7q22.1   | RELN      |            | reelin                             | 517.7     | 7     | rs2247776  | 102986955     | T      |           |
| 786 | 7q22.1   | RELN      |            | reelin                             | 517.7     | 7     | rs2229860  | 102993063     | T      | Pro157Arg |
| 787 | 7q22.1   | RELN      |            | reelin                             | 517.7     | 7     | rs123712   | 103018526     | T      |           |
| 788 | 7q22.1   | RELN      |            | reelin                             | 517.7     | 7     | rs362685   | 103034019     | T      |           |
| 789 | 7q22.1   | RELN      |            | reelin                             | 517.7     | 7     | rs977639   | 103047145     | T      |           |
| 790 | 7q22.1   | RELN      |            | reelin                             | 517.7     | 7     | rs362698   | 103064528     | T      |           |
| 791 | 7q22.1   | RELN      |            | reelin                             | 517.7     | 7     | rs6958081  | 103079061     | T      |           |
| 792 | 7q22.1   | RELN      |            | reelin                             | 517.7     | 7     | rs1860686  | 103079680     | T      |           |
| 793 | 7q22.1   | RELN      |            | reelin                             | 517.7     | 7     | rs727531   | 103088691     | T      |           |
| 794 | 7q22.1   | RELN      |            | reelin                             | 517.7     | 7     | rs1012065  | 103098311     | T      |           |
| 795 | 7q22.1   | RELN      |            | reelin                             | 517.7     | 7     | rs1541329  | 103108339     | T      |           |
| 796 | 7q22.1   | RELN      |            | reelin                             | 517.7     | 7     | rs12666897 | 103113430     | T      |           |
| 797 | 7q22.1   | RELN      |            | reelin                             | 517.7     | 7     | rs1858782  | 103131063     | T      |           |
| 798 | 7q22.1   | RELN      |            | reelin                             | 517.7     | 7     | rs496907   | 103149720     | T      |           |
| 799 | 7q22.1   | RELN      |            | reelin                             | 517.7     | 7     | rs10487166 | 103162502     | T      |           |

Key appears on page 109.

|     | K      | L      | M                                                                                       | N       | O       | P       | Q       |
|-----|--------|--------|-----------------------------------------------------------------------------------------|---------|---------|---------|---------|
| 1   | Prom** | TFBS** | Association (reference)                                                                 | MAF_CEU | MAF_YRI | MAF_JPT | MAF_HCB |
| 758 |        |        |                                                                                         | 0.42    | 0.01    | 0.35    | 0.32    |
| 759 |        |        |                                                                                         | 0.26    | 0.14    | 0.26    | 0.22    |
| 760 |        |        |                                                                                         | 0.02    | 0.07    | 0.11    | 0.02    |
| 761 |        |        |                                                                                         | 0.35    | 0.15    | 0.23    | 0.22    |
| 762 |        |        |                                                                                         | 0.24    | 0.15    | 0.14    | 0.14    |
| 763 |        |        | p=0.009 (Egan et al. 2004)                                                              | 0.25    | 0.30    |         | 0.13    |
| 764 |        |        |                                                                                         | 0.27    | 0.33    | 0.09    | 0.20    |
| 765 |        |        | haplotype (Chen et al. 2005)                                                            | 0.28    | 0.28    | 0.16    | 0.21    |
| 766 |        |        | p=0.00001 (Egan et al. 2004), p=0.011 (Fujii et al. 2003), haplotype (Chen et al. 2005) | 0.28    | 0.34    | 0.15    | 0.24    |
| 767 |        |        |                                                                                         | 0.02    | 0.00    | 0.08    | 0.03    |
| 768 |        |        |                                                                                         |         | 0.02    | 0.08    | 0.04    |
| 769 |        |        |                                                                                         | 0.04    | 0.00    | 0.05    | 0.00    |
| 770 |        |        |                                                                                         | 0.09    | 0.13    | 0.00    | 0.01    |
| 771 |        |        |                                                                                         | 0.09    |         |         |         |
| 772 |        |        |                                                                                         | 0.09    | 0.39    |         | 0.21    |
| 773 |        |        |                                                                                         | 0.23    | 0.47    | 0.43    | 0.42    |
| 774 |        |        |                                                                                         | 0.31    | 0.47    | 0.31    | 0.46    |
| 775 |        |        |                                                                                         | 0.05    | 0.20    | 0.09    | 0.18    |
| 776 |        |        |                                                                                         | 0.03    | 0.03    | 0.13    | 0.07    |
| 777 |        |        |                                                                                         | 0.09    |         |         |         |
| 778 |        |        |                                                                                         | 0.16    | 0.09    | 0.40    | 0.22    |
| 779 |        |        |                                                                                         | 0.05    | 0.34    | 0.22    | 0.44    |
| 780 |        |        |                                                                                         | 0.27    | 0.43    | 0.23    | 0.21    |
| 781 |        |        |                                                                                         | 0.04    | 0.00    | 0.07    | 0.01    |
| 782 |        |        |                                                                                         | 0.14    | 0.26    | 0.34    | 0.37    |
| 783 |        |        |                                                                                         | 0.06    | 0.29    |         | 0.23    |
| 784 |        |        |                                                                                         | 0.45    | 0.16    | 0.16    | 0.23    |
| 785 |        |        |                                                                                         | 0.11    |         |         |         |
| 786 |        |        |                                                                                         | 0.01    | 0.00    | 0.00    | 0.00    |
| 787 |        |        |                                                                                         | 0.32    | 0.08    | 0.33    | 0.26    |
| 788 |        |        |                                                                                         | 0.05    | 0.00    | 0.08    | 0.13    |
| 789 |        |        |                                                                                         | 0.13    | 0.33    | 0.10    | 0.12    |
| 790 |        |        |                                                                                         | 0.18    | 0.04    | 0.18    | 0.26    |
| 791 |        |        |                                                                                         | 0.37    | 0.32    | 0.47    | 0.41    |
| 792 |        |        |                                                                                         | 0.10    | 0.14    | 0.01    | 0.03    |
| 793 |        |        |                                                                                         | 0.32    | 0.30    | 0.42    | 0.31    |
| 794 |        |        |                                                                                         | 0.18    | 0.45    | 0.11    | 0.16    |
| 795 |        |        |                                                                                         | 0.45    | 0.48    | 0.44    | 0.46    |
| 796 |        |        |                                                                                         | 0.17    | 0.15    | 0.09    | 0.13    |
| 797 |        |        |                                                                                         | 0.16    | 0.45    | 0.16    | 0.26    |
| 798 |        |        |                                                                                         | 0.35    | 0.00    | 0.31    | 0.22    |
| 799 |        |        |                                                                                         | 0.09    | 0.07    | 0.08    | 0.09    |

Key appears on page 109.



|     | R                                                                                                                               |
|-----|---------------------------------------------------------------------------------------------------------------------------------|
| 1   | Sequence                                                                                                                        |
| 758 | GAGATAAAGATCCTCAAATGTATTCCCAATGTCATCTAGAAAACCTCCTAAGAAAGTCAAG[A/G]TGGGGCTCAGGGTTTATGGTCATCACACTTGACCTTCTTTAATGATAAGATGATGTAAG   |
| 759 | TCTTGGACAAATTCCTTTTCATTCTTAATTTTCTTATTTAAAAATATTGTCAGATTGG[A/G]TTGGCTATACCTATCTCCTAGGATTTTTGAAAATAGGTTTGAGAGTGTAAAGGGTAACAG     |
| 760 | TTATTAGCATCTTTACAGATAAGAAAACAGAGATGCCAAGAGCTGTTCAAGACCCTAA[A/C]GCAAATGGGCAATGTTACCTCTCTAATCTAGCTCCTCTTATGAATCCACTATACGAA        |
| 761 | TTCATCATTTTCCCAATCCCAGAAAGATTGGTTTCATGAAAACTCCCATTGGTAGAAA[A/C]ACAAGAAGTGAAGTCAAGTATAGATCTTTTGTACTTCTGTGTTCTTTTAACTACCCCATGT    |
| 762 | GTGGGACAAAATTGCCCCCATCGTCTCACTCCCATTCTTTACACATGTGCCACAGATGC[T/C]TTGATTTGAGAGCAGCTCTAGGGTTCCATTCCAATTGACTTAGACCAACTATTCCAGA      |
| 763 | TTAAACCTATGATATTTTGCCTTAATGACACAAAGTTCTCTTTCCAAATTACCATTAAT[A/G]TGTGCCTTTTTCATGGATTGATATGTACAATTTCAAGTATTTCAATATGGAAAGAGCAGCG   |
| 764 | TTTGTTCACTTCTGAGGAATTCGAATTGGAATCTAAACAGGATAAACCACTTAATAATC[T/C]GTCTTTGACTTTAGCCACCCTTAGATTTCTGGCACTTGCTGAACTGCAATATTGAATTTT    |
| 765 | GAAGAAATCTTACTCCCAGGGCTTCACTTATATGTGAAGAGGACAATTCCCTGTTACTGA[T/C]GGACTCATCATAACAGGACTGAATAGTATGTACAGCTAAGCTAAGACAGTTTTCTTTTT    |
| 766 | CACATTTCTGGATCATTGCACAGTGATATGTTCCCTCAGCTTGAATGTTATAGGCAGTA[A/T]AATGATTGTTATCTCATAATGCATAAAAATTGCACTGGAGGCAAACCAGTCTCCAGTTA     |
| 767 | TCTAGTCACAGTGCCCCTCATTATCATCAGAACTTCTAGAGTTATTTAGAGTTCCAATA[T/C]TGTTTTTAATCTTCTAATTTAAAAAGTACAACATAAAAAATAAATTGATTGTGTTTCAAGT   |
| 768 | AGAGGCAGAAAAGAAATTTGAATCTACTGCAGTAGATCAATGCAATACATGCACACACAC[A/T]TGACACATATATAACAACATACGCTGAGCCTACCTCCTTAGACATTATCTTATGTTGCAG   |
| 769 | GATTGCAAAGGGATAGAGCGAGAGATATGAATGGTGAATGGGAAGTGGGCCAGATTGTGT[A/G]GGACTGTGAAATTCATACTTTGTGATACTTTATTATGTAGGATGTAGTTCCATGATACAC   |
| 770 | TCTAAGAAAAGAGTAAAGATTGGCAGTAAATAGAAGCACACAGTAGTAGAACAGAGTAC[A/G]TGGCATAGAAATGGGTGATCAGAGGGGTGGTGTATGTTGGCAAGACAAACATGATGAGCA    |
| 771 | AGATGGGTTGTGCAGAGACATGGCTGATGCCTCAAACAATCAAAGTATTATGTATCTTT[T/C]CAAACAAGACAATTAGGCGTGTATATAAATCTTCAGAAAAGTGTGTTTTGAGAGGGCTG     |
| 772 | TTCTACGTGTTCAAGTATTACATTTTCTTTG[A/T]TTACTCCCTCTATAAGTGAAGTCTTTTTTTTTTTTACTTTGAACTCTCATAGTGCTCATTTC                              |
| 773 | AGACATTTGGGAAGCCCTTTTCTCACAATAGTCCCCTCTCCCAGAGGCTGGAGGCAGGA[T/C]GCAGCCATGGAAGTAAACAACCTACTGAATCCCTTCTGCTCTCTGTGGTCTTTTCAAGTGCA  |
| 774 | GGGACTGGGAAGTGTGCGTAAAGCACTTTATTCAAAGACTCTTTATGTTTACAAAGATT[T/C]GTTTAGTCAGACTATCTGATTAATACAGTCTAGGTGCACCTGTTATTTTCTTTTGTGTAT    |
| 775 | ACTGCTCATATTATATACACTCTATAGACAAAACACTAATATAAATACATTGTTTCAGGA[A/G]CATAAATACTAGGAGGATTGAGATATATGCCCTTTGCTGATATTAGTACACACACAACC    |
| 776 | GAGAGAGGAAAAGTCAACATCAGACAAAGCCCCTGCAAGCTTGTCTCAAATAGTGAAG[A/G]CTACTCTTTTCTAGTCCAAGATGATGAAAAGTACTGATTTTTCAGAGAGCTTCCAGAA       |
| 777 | attcccttttgaacatcttagactcttaggacagcaccttagagcttagtggtgttc[T/C]jaAACGTCCAGGAAGTTCGTATCCAGGGGCTTCCATTCTCACAGTAAGCAATGTGGAAATG     |
| 778 | CTGCAGACATTAAGTAGCTTCCACGGTGTGGCTAAAACCACCTGGGTTTCAAAGTGTAG[A/T]JAATCTTTAAAGAAGGTGGTATCAGTTAGGTCATTAGGGCTAGTAGAAGGGGAATAGATAA   |
| 779 | ATTTTATAAGCCCTGATCCCTTTCCATAGAGACAAGAATGAAAGGTTTTTACATAAAA[T/G]JAATGCTTCAGGTGATAATTCTCAAGATAATGTCCATAATAAAAATTTAAAGCAGACATA     |
| 780 | GAAAACAGTGGCTGCATCACTTGGCTTCTCAAATTAATTCAGAGATGCCAGACAAGT[C/A/G]TTTAAATAGGCCATTGGATACAGAATAGACTGAAACAGAGTCTGTTTTCTGCTAGTGA      |
| 781 | GAGACAATTACTTATTTGGGAACACCTAATAATTTCTAAATAGAGAAGTCAAGTCTGCTAA[T/C]JAAAAATCTGAAAATAGGAACATCAAATTAAGTATATGCATTAAGTGGGATAATGATAA   |
| 782 | AAGCTAATCAACAGAACAATATACCTTCAAAGTATGCACATCTGATCAATGAACAATGGG[A/C]JAGCTTCTACCTATGCTCAACACCCAAAGAAAATAGAAAACATTTGCCATTTCAAGAACAAA |
| 783 | ACAAGGATCATAAACTTCTGTTGCTAAGTCCCCACACTTTCTGAGTGAAGTCCATGCCA[T/C]TCCCCAGTATCTTTCCAATAAGTCTTTTCACTTTTTTGGTAAGCCTCTTTATATTTCTTG    |
| 784 | ATTTTAAATATCCACTGATCTGCTTGAGAACAGAGGAAGAAACGTCAGGTGGAATTTCC[T/C]CATGATAAAGTGGCAAGTGAACGATGACTTCAGGAATAAACTGTCAAAGGAGAAACAAT     |
| 785 | ATATGTCGGATTCTAAAACGTCTATCCTTTATGAGATACCAGTGTGTTTATTAATAACT[A/G]TCTTTTGGTTTGGGGAGAAAAATATCCAGATAATGCCAAATGTAGAATTTGAGAATTATT    |
| 786 | AGCTCCAGTATTCTCTGAACAATGGCAAGGACTGGCATCTGTACCAGAGAGTGTGTT[C/G]TCCAACCATTGGCTGTCTGCATTACACGGAAAGTTCAATTTACACCTCGGAAAGATTCCA      |
| 787 | TAAGTGCCTTTCTTTTCTATTTTCTTCTGATCTTTATAGGGAAGCTATATTTGGT[C/A/C]TACAGTTGAAGTTATTACACATCTAGAGCTTTCCTCCACATTCTGTTATACATAGCGTTG      |
| 788 | GTTTGCTAAAACAGTAAGTCAGTGAGTGGATGAACAGGTGAGTAAAGGGC[A/T]GCCTGCTTATGGCTTCTGTAGGTGACGGAATGAAGAATGACTAGTAGTT                        |
| 789 | GTTGAAGTCCAGATTCCATTTTCCAGCCGGCCACTTGCTGTGTCTCCTGTGGAAGTGGT[C/C]CAATTTACCAACATTCCAGATGCCAGCAGCTAATCCAAAACTTTAACAAATATATAG       |
| 790 | TTTTATTACAACTCATTAAATTTATAAAGAAACAGCATAAAGCACTTCCAATAAGA[T/C]JACCAGAATAAATTTTTCTAAGAACAATGTTAAAATACATGTTATGTTGCTGATAGGA         |
| 791 | GTCCAATTTCAAATTTAACTTTCTTCCATTTTCTATGCTGCATTTCTCTATAAGTAG[T/C]JTGGAATAACCACAGAAGTCCATATAGAATTAAGTTCATGCAGTCCAAAATATAAGT         |
| 792 | TCTCTTCACTAAAGTCTGACCAGCTTTCAAAGGGCAATCAGTTAAATTAAGTCTATAAAA[T/C]JAAACTATGTTTCAAAGACAACAATGGTAACTTGAGTTTGTGCTCTTGAGTTTGATAGGT   |
| 793 | TATTAACCTAAATTTCTCAGCTTCTACTACAAAAGAGTTATGCAATGATGAGATATTCA[T/G]JAAAACAAAGGCTCACCTTGATGACTATTTTTGGGGGAAGCTGGGAAAAAGAAATCGCT     |
| 794 | TTCTGAATGACTATATGCCAACAGTTTAAAGTGAAGAATGGGAATTAGCATGGGGGGG[A/G]JATTTTAGACTTTTACTTTGCTCATTCTTTTGCAGTAAGCAAATAATTTCCAGGAAAAAG     |
| 795 | TGTCAAAGCTCTGGACTCCACCAAGCTCTTTGATCTGGGAGAGGAGTGCAGTCTTCTTA[A/G]JAAGAGCTAGAAGGGACCAGAAACCACTGTTTCTTTTTTCCCTCTAGGGTCTCCCCAGCC    |
| 796 | TACTAGTAGGTTACCGATTTCTAAAGTCCCTTAAAGTATGGCTCTTATGTGTTTCTTTG[T/G]CAATCAAAAATATTTTCTACTTTGCCACTAAATGGATTTCTTTACTTTGAGAAGCAGAA     |
| 797 | ACACAAACCCTCCAAATGCAATCCCCTACTATCCCATAGACTTTGGTCAAGCAATAAGCT[T/C]JGTTCTTGCCAGATGGAAATGGCTCCTTGATTCTGCCTAGGGTAAGATGAGGAAAGAGT    |
| 798 | TACACTTGTTAATAAGTCAAAGAAAACCTTTTCTCAAAAAACCATTATTTTTGTTTTT[T/C]JTAACACTTACTTATGATCACACATGGACTTCTGAACTGTCTGTAATTTGTTGTAGGTA      |
| 799 | AGGGAAAAATCCAATTTCTATAAAAACAATGTGCATTTCAAGGAATGTTTATCATTTTGA[T/C]JGGTGAACATTTATTTGAAAATTTACAATAACTTTTCTTAAAAACTGTTTTTCAATTA     |

|     | A        | B         | C          | D                                                        | E         | F     | G          | H             | I      | J         |
|-----|----------|-----------|------------|----------------------------------------------------------|-----------|-------|------------|---------------|--------|-----------|
| 1   | Cytoband | Gene Name | Gene Alias | Description                                              | Size (kb) | Chrom | SNP ID     | Position (bp) | htSNP* | Coding    |
| 800 | 7q22.1   | RELN      |            | reelin                                                   | 517.7     | 7     | rs471360   | 103168085     | T      |           |
| 801 | 7q22.1   | RELN      |            | reelin                                                   | 517.7     | 7     | rs634500   | 103178645     | T      |           |
| 802 | 7q22.1   | RELN      |            | reelin                                                   | 517.7     | 7     | rs4446675  | 103184569     | T      |           |
| 803 | 7q22.1   | RELN      |            | reelin                                                   | 517.7     | 7     | rs694894   | 103184640     | T      |           |
| 804 | 7q22.1   | RELN      |            | reelin                                                   | 517.7     | 7     | rs10487169 | 103184694     | T      |           |
| 805 | 7q22.1   | RELN      |            | reelin                                                   | 517.7     | 7     | rs2283029  | 103185455     | T      |           |
| 806 | 7q22.1   | RELN      |            | reelin                                                   | 517.7     | 7     | rs663302   | 103185721     | T      |           |
| 807 | 7q22.1   | RELN      |            | reelin                                                   | 517.7     | 7     | rs10487172 | 103189479     | T      |           |
| 808 | 7q22.1   | RELN      |            | reelin                                                   | 517.7     | 7     | rs141473   | 103194962     | T      |           |
| 809 | 7q22.1   | RELN      |            | reelin                                                   | 517.7     | 7     | rs262340   | 103205478     | T      |           |
| 810 | 7q22.1   | RELN      |            | reelin                                                   | 517.7     | 7     | rs262342   | 103206219     | T      |           |
| 811 | 7q22.1   | RELN      |            | reelin                                                   | 517.7     | 7     | rs1510846  | 103208938     | T      |           |
| 812 | 7q22.1   | RELN      |            | reelin                                                   | 517.7     | 7     | rs262355   | 103213351     | T      |           |
| 813 | 7q22.1   | RELN      |            | reelin                                                   | 517.7     | 7     | rs1404431  | 103223839     | T      |           |
| 814 | 7q22.1   | RELN      |            | reelin                                                   | 517.7     | 7     | rs39327    | 103231907     | T      |           |
| 815 | 7q22.1   | RELN      |            | reelin                                                   | 517.7     | 7     | rs39330    | 103236791     | T      |           |
| 816 | 7q22.1   | RELN      |            | reelin                                                   | 517.7     | 7     | rs6465937  | 103240727     | T      |           |
| 817 | 7q22.1   | RELN      |            | reelin                                                   | 517.7     | 7     | rs39343    | 103251234     | T      |           |
| 818 | 7q22.1   | RELN      |            | reelin                                                   | 517.7     | 7     | rs39379    | 103266305     | T      |           |
| 819 | 7q22.1   | RELN      |            | reelin                                                   | 517.7     | 7     | rs39383    | 103267479     | T      |           |
| 820 | 7q22.1   | RELN      |            | reelin                                                   | 517.7     | 7     | rs1848959  | 103268966     | T      |           |
| 821 | 7q22.1   | RELN      |            | reelin                                                   | 517.7     | 7     | rs2299394  | 103299179     | T      |           |
| 822 | 7q22.1   | RELN      |            | reelin                                                   | 517.7     | 7     | rs2299395  | 103316276     | T      |           |
| 823 | 7q22.1   | RELN      |            | reelin                                                   | 517.7     | 7     | rs802786   | 103333644     | T      |           |
| 824 | 7q22.1   | RELN      |            | reelin                                                   | 517.7     | 7     | rs802787   | 103336960     | T      |           |
| 825 | 7q22.1   | RELN      |            | reelin                                                   | 517.7     | 7     | rs2299403  | 103343150     | T      |           |
| 826 | 7q22.1   | RELN      |            | reelin                                                   | 517.7     | 7     | rs10487174 | 103355110     | T      |           |
| 827 | 7q22.1   | RELN      |            | reelin                                                   | 517.7     | 7     | rs10487175 | 103360382     | T      |           |
| 828 | 7q22.1   | RELN      |            | reelin                                                   | 517.7     | 7     | rs3735630  | 103361697     | T      |           |
| 829 | 7q22.1   | RELN      |            | reelin                                                   | 517.7     | 7     | rs6965133  | 103368862     | T      |           |
| 830 | 7q22.1   | RELN      |            | reelin                                                   | 517.7     | 7     | rs7808549  | 103370996     | T      |           |
| 831 | 7q22.1   | RELN      |            | reelin                                                   | 517.7     | 7     | rs876425   | 103371937     | T      |           |
| 832 | 7q22.1   | RELN      |            | reelin                                                   | 517.7     | 7     | rs10237086 | 103402273     | T      |           |
| 833 | 7q22.1   | RELN      |            | reelin                                                   | 517.7     | 7     | rs10487180 | 103406534     | T      |           |
| 834 | 7q36.1   | KCNH2     | HERG       | potassium voltage-gated channel, subfamily H, member 2   | 33.1      | 7     | rs4725982  | 150268796     | T      |           |
| 835 | 7q36.1   | KCNH2     | HERG       | potassium voltage-gated channel, subfamily H, member 2   | 33.1      | 7     | rs6947240  | 150288142     | T      |           |
| 836 | 7q36.1   | KCNH2     | HERG       | potassium voltage-gated channel, subfamily H, member 2   | 33.1      | 7     | rs2968857  | 150293263     | T      |           |
| 837 | 7q36.1   | KCNH2     | HERG       | potassium voltage-gated channel, subfamily H, member 2   | 33.1      | 7     | rs748693   | 150302370     | T      |           |
| 838 | 7q36.1   | KCNH2     | HERG       | potassium voltage-gated channel, subfamily H, member 2   | 33.1      | 7     | rs11771844 | 150306843     | T      |           |
| 839 | 8p21.3   | SLC18A1   | VMAT1      | solute carrier family 18, member 1 (vesicular monoamine) | 38.4      | 8     | rs17092104 | 20049834      |        | Val392Leu |
| 840 | 8p21.3   | SLC18A1   | VMAT1      | solute carrier family 18, member 1 (vesicular monoamine) | 38.4      | 8     | rs903997   | 20049996      | T      |           |
| 841 | 8p21.3   | SLC18A1   | VMAT1      | solute carrier family 18, member 1 (vesicular monoamine) | 38.4      | 8     | rs6992927  | 20074325      | T      |           |

Key appears on page 109.

|     | K      | L      | M                                | N       | O       | P       | Q       |
|-----|--------|--------|----------------------------------|---------|---------|---------|---------|
| 1   | Prom** | TFBS** | Association (reference)          | MAF_CEU | MAF_YRI | MAF_JPT | MAF_HCB |
| 800 |        |        |                                  | 0.11    | 0.45    | 0.05    | 0.09    |
| 801 |        |        |                                  | 0.43    | 0.12    | 0.37    | 0.35    |
| 802 |        |        |                                  | 0.05    | 0.03    | 0.08    | 0.06    |
| 803 |        |        |                                  | 0.29    | 0.10    | 0.24    | 0.45    |
| 804 |        |        |                                  | 0.03    | 0.05    | 0.07    | 0.09    |
| 805 |        |        |                                  | 0.14    | 0.28    | 0.10    | 0.08    |
| 806 |        |        |                                  | 0.35    |         |         |         |
| 807 |        |        |                                  | 0.14    | 0.02    |         | 0.35    |
| 808 |        |        |                                  | 0.36    | 0.17    | 0.43    | 0.40    |
| 809 |        |        |                                  | 0.31    | 0.39    | 0.48    | 0.48    |
| 810 |        |        |                                  | 0.41    | 0.31    | 0.09    | 0.07    |
| 811 |        |        |                                  | 0.20    | 0.36    | 0.49    | 0.48    |
| 812 |        |        |                                  | 0.41    | 0.28    | 0.24    | 0.29    |
| 813 |        |        |                                  | 0.22    | 0.09    | 0.30    | 0.27    |
| 814 |        |        |                                  | 0.18    | 0.30    | 0.13    | 0.10    |
| 815 |        |        |                                  | 0.45    | 0.28    |         | 0.29    |
| 816 |        |        |                                  | 0.37    | 0.18    | 0.49    | 0.49    |
| 817 |        |        |                                  | 0.31    | 0.44    |         | 0.30    |
| 818 |        |        |                                  | 0.22    | 0.18    | 0.09    | 0.13    |
| 819 |        |        |                                  | 0.43    | 0.39    | 0.21    | 0.24    |
| 820 |        |        |                                  | 0.18    | 0.19    | 0.28    | 0.23    |
| 821 |        |        |                                  | 0.08    | 0.03    | 0.39    | 0.39    |
| 822 |        |        |                                  | 0.10    | 0.04    | 0.38    | 0.38    |
| 823 |        |        |                                  | 0.21    | 0.00    | 0.13    | 0.24    |
| 824 |        |        |                                  | 0.42    | 0.26    | 0.44    | 0.42    |
| 825 |        |        |                                  | 0.21    | 0.46    | 0.38    | 0.31    |
| 826 |        |        |                                  | 0.40    | 0.47    | 0.47    | 0.50    |
| 827 |        |        |                                  | 0.03    | 0.25    | 0.26    | 0.21    |
| 828 |        |        |                                  | 0.50    | 0.48    | 0.22    | 0.26    |
| 829 |        |        |                                  | 0.21    | 0.03    | 0.43    | 0.37    |
| 830 |        |        |                                  | 0.18    | 0.29    | 0.49    | 0.39    |
| 831 |        |        |                                  | 0.43    |         |         |         |
| 832 |        |        |                                  | 0.43    | 0.15    | 0.40    | 0.36    |
| 833 |        |        |                                  | 0.08    | 0.02    | 0.16    | 0.17    |
| 834 |        |        |                                  | 0.22    | 0.25    | 0.28    | 0.36    |
| 835 |        |        |                                  | 0.25    | 0.03    | 0.00    | 0.02    |
| 836 |        |        |                                  | 0.35    | 0.08    | 0.13    | 0.18    |
| 837 |        |        |                                  | 0.30    | 0.08    | 0.17    | 0.20    |
| 838 |        |        |                                  | 0.04    | 0.00    | 0.00    | 0.00    |
| 839 |        |        | haplotype (Richards et al. 2006) | 0.08    | 0.00    |         | 0.04    |
| 840 |        |        |                                  | 0.26    | 0.04    | 0.33    | 0.42    |
| 841 |        |        |                                  | 0.25    | 0.03    | 0.27    | 0.23    |

Key appears on page 109.

|     | R                                                                                                                              |
|-----|--------------------------------------------------------------------------------------------------------------------------------|
| 1   | Sequence                                                                                                                       |
| 800 | TATTACCCAAGTTGTTGACCCTGGAGAAAGAATAAAGGTCTAATGTGGGAAGGAGGCTTA[T/C]TTTTACTGCTTATATTTTTGGATTATTTGAAATTTTAACCACATAAATTTTAAATTTTT   |
| 801 | CTAGAAGAACTTTGGGCATGTCAAGTGAATATTTTACCACCACTGTAGAGTTCATATTTT[C]GCTGAATAGATGATGAATAAGTAAACTCACTTTCATGGCTACGGTGTAAAGTGTGCT       |
| 802 | CATTTAGTATGCAAAACTTAATGCAAGGAAAAGTACAAAATTTTCTGAAAAGATTCACG[C/G]ATATGTGGCATAAAAATGGCCAAAGCCTAGTAAAGTACCGGCCCTAGAAGCTTATTTTA    |
| 803 | TAAAAATGGGCCAAAGCCTAGTAAAGTACTGGGCCCTAGAAGCTTATTTAATCATTTCTC[A/G]ATAAATGACCATATCAATCTAGTTTTATGTAGTCTAAACAAAATTTTCTAAGCCCGTAGGA |
| 804 | TTTCTCGATAAATGACCATATCAATCTAGTTTTATGTAGTCTAAACAAAATTTTCTAAGCC[T/C]GTAGGAAGTTCACCATCTTTTCCACATTTACTGAGGTAAATGCACCACGGAAAAATTTAA |
| 805 | CCAAAGGTGTGCACAGAGGGAGATGCACTAGGGATGGGAACCCTGCTACTTGTGACAGGA[T/C]ACTGAATTGAAGAGAGAGGAAGATAGGCTGGAGTTGTTCTGTACCCAGAGAGATCACTGT  |
| 806 | TTTTCAGAAGTGAATATTTTTTCTGTAAGGTAGGATGTTCAACTAGGAATGAATGTTCCGG[A/C]TAGGATGAATCTAGGAATATCCAATTCTGTTAAGAGTTCCTGTTAGAAAAGTGCATGTGA |
| 807 | GTGAGCCACCATGCCTGGCCAAAATTTAATTTTTAAAAAATTGTTACTGTGTAGCAACTT[T/C]TAAAAATCCTAGACCTTTGAGAACTGAAGAGATGAAGTTCATAGATGGAGCAGATGTGA   |
| 808 | AGTATATGTGTTCTTTCCAAGTTTTTCAGGGAATTTAGGCAGTAGTGATAATCTTGTTA[T/C]TAGGGCTGTGGTTCCTGAGGGTTTTAATGTTTGATCTTTTTTAACTTTAAGAATCTAC     |
| 809 | CATCCTGATTGAATTGTAAGTAGACCCTAGTGTGAGTCCCGTGGACCCAAGTCTCTGAA[A/G]GTAATCTGATAAAATTAATCCATGTTGAAGTGTAAATGGGTGATCACTTCAAGCTAACA    |
| 810 | TCTTATTGGTCCACAAGCCTACTTGTGATGTCAGCCTATGCTCCCATGAACACGATC[A/G]GCCAAATTATCAAAATAAGATTCAGGTAACAGAGGTTTACCTTTTCTCTAAATATCAGA      |
| 811 | AGCCATCCGACTGCACTCCTTAGGGTGGGATTAATGTCAATATGGCAAGCCTATTTGAA[T/C]GATTTAGAGCTGTCAAATAATTCATGGTGGTTTACCACAGAATCACAGCATTATTTT      |
| 812 | CAATTTAAGGTTCAAACAGCAGATCTGGAATCAGAAGATGTGGGTTTGCACCACAGCTC[A/T]ATGATTTATGTTGATCTTATATGAGTGTAAATTTTCTGAGATAGGACTAGAAATGTTGTG   |
| 813 | GTAATATGGAAATCAGTATTCTGTATGACCTAATTTAAAGGGATAAGTGTGTTGAGTACAT[A/G]CACTCAGTTCAGTGTCCAAAATAATTTACTGCATATAACTCCAGGGATATTTAAATTAT  |
| 814 | ATCAATCATGCAGGTATGTTAGACATAATTTAGAATAATCTTATATGTACTTGAATAA[T/C]CTACTTTTAAACCCAAACTGAATCAACTTTTTAAAAATTTTCCATAAACAAATGCAAGA     |
| 815 | TCCCTCAGAATTGAAAGGCAATGCTCCTCAGAATTGTAATGCACTGACTTCTAGCTTTC[A/T]GTGTGGCTTGAGAAGCCCAAGGCCATTCCATTCTTAACGCTTCTAGGGAAGAACTTT      |
| 816 | CCAGATACCTTTTAAATTTTGTCTTATTCTTCATCGGTTTTTGAACAAACATCTCTCC[T/G]TTTAGTATCATCTGAGAACTTAATTAACCTGCTTTTTCCCTCTGTTTTAGGTCAATGAT     |
| 817 | ACATTAGTGTATAATTTGGAGGGAAAAGGAAATCAGTATTAAAGTTTTCAAATGTCATCA[A/G]ATTATTTGCAAGAAGGTTATGGGCTCAGTTGACTGTTAAAAATGTAATGTAAAGAACA    |
| 818 | GGACTTTGTTTTCTTTTTGGCCAGGCAGACTCCTGCAGACTTGTCAATTTCCATACACC[T/G]GATCCCTGCTTTATGCCTGACCAGAGGGGAGTGGCAGCTCCTGAGTACGCTATTGAGTC    |
| 819 | tgctcataaataattaacttattaagccctcacaaccctgaagtaggagtggtac[A/G]ttctcatttactaattaagacactgagaaaaatagagtgatggttgatactatgct           |
| 820 | ATGATTTTAAACATCCATACTTTATTAAGGAATCATGGCTTTACAGAGTGATATTGAT[T/G]GTTGGTACAGAAATACAGCAAAGTTATGATTCTTTTTAAGATGTTTGTACACAATATG      |
| 821 | TAGATCACAAAATCTTTAACTACCAAGAATGATTTCCCAAGCAAGAGACTACATTTGCC[A/G]TATTAATAGGACAGTCATGGATTTTAGGTCTCTAGTTTACAGAGGAAGCATGACCCTTT    |
| 822 | ATCATTTAACAAGGTTTCTAAGGACCATTTATTTAGCATTTTGTAAAGAGATGGCCTCA[A/G]AATCTAGTAAAGAAGACTCCCTGGCAGAGCCACTACTTGCCTGTCTTGGCCTTCGTAGA    |
| 823 | GTTTTAATAGAGGAGGTAAGTATGGAAGGGGGCCCTAAAAGATGGCAGAGGATTTGCCCC[A/G]GAGACCGAGCCAGAAAGAATTTCAAAGGGACACAAAACAGGGCAGTAGACGTTTTAAAGAG |
| 824 | CTGCTGCTAATGCCCTGGGAGTATGGGCCTTGGCGATAATTAGCAAGTTTGAATAGGTT[T/G]CTACTTAGTCTTAATGTGAAGGATAATGAAAAGTTAGCATACAGGCCCTGCATTTCTATG   |
| 825 | TCTTTCAAATAGAATAGAAGTCTCACACTTTAACATGGATCAACATCACCTGGAGTGT[T/G]ATTTCAAAAAATGATCACAGGATCCCACCCTAGAAATTTCTGATTCACTGTGTTTGAAGT    |
| 826 | TGCTGACATCGAAATTCACAAAATAAATGTTAAATTCACAAAATAATGTCAAATAAATGA[T/C]GTTCAAGTACTAGCACAGATAGTTGCTCTAATATGCTACAACCTGAATTTAAGATTTTCA  |
| 827 | TGGAGTCAGAATGGCTAGCAGCAACAGAAAAGGGCACTTCACTGACATAGGATTTCCATT[A/C]ATCTAGAGGCAaagcaagctaccaagtgaggcaactgaaactaatcatcaggtaaaac    |
| 828 | GTCATGGTATGGATGAAAAAATAGGCACTATTGAGAACCTTAAAGAACAAGAACCGAAG[A/G]TTTTGGCTGTTTCTCATCATCTCATGGAAAGGTGGGCAGGGATCAGGGTGCCACAGAAC    |
| 829 | GACACGAGACTGGTACAATTTCTCTAAGACATACTACCCCTCAGAAGAGCTTAGACTTCC[A/G]TAACTGTACCTTTGGGAGAGTTTTAACACATCTAGAAAAGAGAAAAGATGATTTCAAGTT  |
| 830 | CCAAGTTGGAGATAAGATGGGACACCCTGTATTTAAATTTGTGACAGCTGCCCTGAGCC[A/G]GAAACACATTTACATCCTGACCACCGGCTGTTAGAATAATCATGTAAAGCTTTGTGCAG    |
| 831 | GATCTAGGAGTCCCAGTCACTGTTCACTACTGTCTCCACACGCCTAGTATTTCTATGT[A/G]GAAAAAATCAGTTTTTCTTATGATTTATTCTTATTCTTATGTTTTATTAATTTT          |
| 832 | TCCTTGGAAACATTCATGTTAATTTCCATAAGTTTGGAGCCTCCGATCCTCTTAACTTAT[A/G]GGATATCAATACATGTAATTTAATGAAGATGCAGAAATCTCAGCTGCTGTTCCCTTTGTA  |
| 833 | CTGTTAACAGTCTGGCATAAACCACCTTACATTTGAAATAAAAATTTCTAAAAGTTGTAATA[A/C]CTGCATCAGGTGAAATCACGTTAGTCTCATGGCTTCTACCCTCCCACCCTGGAGGCTC  |
| 834 | TGTCCACCACCAGGGGAAAAGGTAGATCCCACAGACCCGAATCTGGAAGTCAAAAGCCCC[T/C]GGTGAACCTCCCTCAGCCTTGACCATCGAAGGACAAATGAACAACCACCCAGAGGACGG   |
| 835 | TCTCCCTATCTCATTTCTCATATCCTCCCAGCACCTCTGCCTTTCCCTCAAGCGAGGC[A/G]CTGTAGCACAGTGTTAAGCCCACAGACTTTAGGCCTACGATCTCTGGGTTTATAGCCCCG    |
| 836 | GCAGCATCTCCAGACAGACTCCTCCACCACCCCTTCCAGCCTGAGACCCAGCCAGCAATC[T/C]ATGGGATCATTTATAGGGTCTTGGGGCCGCTGTAGTCACTAGACCCACCCAAATCCAC    |
| 837 | CCCTAAGGTAGATAGGGGCTGTGCCCGGATGTCAGCGCACAACTGCCAATCTGACCTTT[A/G]ACCTCCATCCACGCACGTACCTGCCATCCCAGCTCGGTCTAACTCTAGTCCAACCTTGCTC  |
| 838 | CCTCGAAGACGAGCCCGGAGTCAAGGGAGACCCTGGAAATAGGAAAAGCAAGACAATCTG[A/G]AGGCCCCAGAGCAGCAGAGCTCTGAAATAAGGGGAGGGTTAACTTAGAAGGGGCACGCC   |
| 839 | AGTCTGATGACTCTTCTCCTTCCCATGCAGGTTCTCTGGCTCACAAATTTTTGGT[C/G]TCATTGGCCCAATGCAGGGCTTGGCCTTGCATAGGTAAGAAGTGCCTCAAAGAAAAC          |
| 840 | GCGCTGGTCAAGTTTTCATATCCTTAAATGGAGGTATAGATTCTTTCCATGAGAAAAGT[C/G]TGAGAGTGCAGGAGGATGATGTATGTGGCCAATAGTGCACCTCTGAATAAATGCATTTTCA  |
| 841 | AGTGAAGCATGTAGCTTGTCAATTAAGTTGTATGAGGGAGGAGCCTCAAAGAAAAGGTA[A/G]TTTTATCGTTTTGGGCTTGGGTTTCCAAGCCAGAAAATCGGAGTCTGTATCCTGGCTGT    |

Complete list of all 94 genes and 1,536 SNPs present on the COGS SNP Chip

|     | A        | B         | C             | D                                                                             | E         | F     | G          | H             | I      | J         |
|-----|----------|-----------|---------------|-------------------------------------------------------------------------------|-----------|-------|------------|---------------|--------|-----------|
| 1   | Cytoband | Gene Name | Gene Alias    | Description                                                                   | Size (kb) | Chrom | SNP ID     | Position (bp) | htSNP* | Coding    |
| 842 | 8p21.3   | SLC18A1   | VMAT1         | solute carrier family 18, member 1 (vesicular monoamine)                      | 38.4      | 8     | rs1390938  | 20080993      |        | Thr136Ile |
| 843 | 8p21.3   | SLC18A1   | VMAT1         | solute carrier family 18, member 1 (vesicular monoamine)                      | 38.4      | 8     | rs2270637  | 20081107      | T      | Thr98Ser  |
| 844 | 8p21.3   | SLC18A1   | VMAT1         | solute carrier family 18, member 1 (vesicular monoamine)                      | 38.4      | 8     | rs2270641  | 20082746      | T      | Pro4Thr   |
| 845 | 8p21.3   | SLC18A1   | VMAT1         | solute carrier family 18, member 1 (vesicular monoamine)                      | 38.4      | 8     | rs7820517  | 20088916      | T      |           |
| 846 | 8p21.3   | PPP3CC    | CALNA3        | protein phosphatase 3, catalytic subunit, gamma isoform (calcineurin A gamma) | 100.0     | 8     | rs7837713  | 22375143      | T      |           |
| 847 | 8p21.3   | PPP3CC    | CALNA3        | protein phosphatase 3, catalytic subunit, gamma isoform (calcineurin A gamma) | 100.0     | 8     | rs2443502  | 22396444      | T      |           |
| 848 | 8p21.3   | PPP3CC    | CALNA3        | protein phosphatase 3, catalytic subunit, gamma isoform (calcineurin A gamma) | 100.0     | 8     | rs2469749  | 22413543      | T      |           |
| 849 | 8p21.2   | EBF2      |               | early B-cell factor 2                                                         | 200.8     | 8     | rs4568629  | 25785669      | G      |           |
| 850 | 8p21.2   | EBF2      |               | early B-cell factor 2                                                         | 200.8     | 8     | rs10106488 | 25793729      | G      |           |
| 851 | 8p21.2   | EBF2      |               | early B-cell factor 2                                                         | 200.8     | 8     | rs11781208 | 25796328      | G      |           |
| 852 | 8p21.2   | EBF2      |               | early B-cell factor 2                                                         | 200.8     | 8     | rs10503779 | 25799345      | G      |           |
| 853 | 8p12     | NRG1      | GGF, HRG, NDF | neuregulin 1                                                                  | 1,124.6   | 8     | rs4281084  | 31614916      | T      |           |
| 854 | 8p12     | NRG1      | GGF, HRG, NDF | neuregulin 1                                                                  | 1,124.6   | 8     | rs7819063  | 31618950      | T      |           |
| 855 | 8p12     | NRG1      | GGF, HRG, NDF | neuregulin 1                                                                  | 1,124.6   | 8     | rs10113797 | 31629879      | T      |           |
| 856 | 8p12     | NRG1      | GGF, HRG, NDF | neuregulin 1                                                                  | 1,124.6   | 8     | rs7840792  | 31632615      | T      |           |
| 857 | 8p12     | NRG1      | GGF, HRG, NDF | neuregulin 1                                                                  | 1,124.6   | 8     | rs9297175  | 31660834      | T      |           |
| 858 | 8p12     | NRG1      | GGF, HRG, NDF | neuregulin 1                                                                  | 1,124.6   | 8     | rs4403369  | 31664440      | T      |           |
| 859 | 8p12     | NRG1      | GGF, HRG, NDF | neuregulin 1                                                                  | 1,124.6   | 8     | rs4733271  | 31686548      | T      |           |
| 860 | 8p12     | NRG1      | GGF, HRG, NDF | neuregulin 1                                                                  | 1,124.6   | 8     | rs12155594 | 31726137      | T      |           |
| 861 | 8p12     | NRG1      | GGF, HRG, NDF | neuregulin 1                                                                  | 1,124.6   | 8     | rs1827536  | 31732659      | T      |           |
| 862 | 8p12     | NRG1      | GGF, HRG, NDF | neuregulin 1                                                                  | 1,124.6   | 8     | rs13270788 | 31750525      | T      |           |
| 863 | 8p12     | NRG1      | GGF, HRG, NDF | neuregulin 1                                                                  | 1,124.6   | 8     | rs10503888 | 31753095      | T      |           |
| 864 | 8p12     | NRG1      | GGF, HRG, NDF | neuregulin 1                                                                  | 1,124.6   | 8     | rs10503889 | 31762338      | T      |           |
| 865 | 8p12     | NRG1      | GGF, HRG, NDF | neuregulin 1                                                                  | 1,124.6   | 8     | rs10087212 | 31773072      | T      |           |
| 866 | 8p12     | NRG1      | GGF, HRG, NDF | neuregulin 1                                                                  | 1,124.6   | 8     | rs2062817  | 31781972      | T      |           |
| 867 | 8p12     | NRG1      | GGF, HRG, NDF | neuregulin 1                                                                  | 1,124.6   | 8     | rs10081404 | 31794013      | T      |           |
| 868 | 8p12     | NRG1      | GGF, HRG, NDF | neuregulin 1                                                                  | 1,124.6   | 8     | rs6987310  | 31795172      | T      |           |
| 869 | 8p12     | NRG1      | GGF, HRG, NDF | neuregulin 1                                                                  | 1,124.6   | 8     | rs776401   | 31836504      | T      |           |
| 870 | 8p12     | NRG1      | GGF, HRG, NDF | neuregulin 1                                                                  | 1,124.6   | 8     | rs10503895 | 31853189      | T      |           |
| 871 | 8p12     | NRG1      | GGF, HRG, NDF | neuregulin 1                                                                  | 1,124.6   | 8     | rs776387   | 31857593      | T      |           |
| 872 | 8p12     | NRG1      | GGF, HRG, NDF | neuregulin 1                                                                  | 1,124.6   | 8     | rs1875722  | 31879970      | T      |           |
| 873 | 8p12     | NRG1      | GGF, HRG, NDF | neuregulin 1                                                                  | 1,124.6   | 8     | rs884530   | 31889125      | T      |           |
| 874 | 8p12     | NRG1      | GGF, HRG, NDF | neuregulin 1                                                                  | 1,124.6   | 8     | rs1481625  | 31899469      | T      |           |
| 875 | 8p12     | NRG1      | GGF, HRG, NDF | neuregulin 1                                                                  | 1,124.6   | 8     | rs7002063  | 31923076      | T      |           |
| 876 | 8p12     | NRG1      | GGF, HRG, NDF | neuregulin 1                                                                  | 1,124.6   | 8     | rs1462878  | 31945845      | T      |           |
| 877 | 8p12     | NRG1      | GGF, HRG, NDF | neuregulin 1                                                                  | 1,124.6   | 8     | rs327325   | 31988398      | T      |           |
| 878 | 8p12     | NRG1      | GGF, HRG, NDF | neuregulin 1                                                                  | 1,124.6   | 8     | rs10954818 | 31995681      | T      |           |
| 879 | 8p12     | NRG1      | GGF, HRG, NDF | neuregulin 1                                                                  | 1,124.6   | 8     | rs1462906  | 32016134      | T      |           |
| 880 | 8p12     | NRG1      | GGF, HRG, NDF | neuregulin 1                                                                  | 1,124.6   | 8     | rs10954822 | 32026808      | T      |           |
| 881 | 8p12     | NRG1      | GGF, HRG, NDF | neuregulin 1                                                                  | 1,124.6   | 8     | rs956203   | 32030300      | T      |           |
| 882 | 8p12     | NRG1      | GGF, HRG, NDF | neuregulin 1                                                                  | 1,124.6   | 8     | rs9297185  | 32063570      | T      |           |
| 883 | 8p12     | NRG1      | GGF, HRG, NDF | neuregulin 1                                                                  | 1,124.6   | 8     | rs10503899 | 32066776      | T      |           |

Key appears on page 109.

|     | K      | L      | M                                | N       | O       | P       | Q       |
|-----|--------|--------|----------------------------------|---------|---------|---------|---------|
| 1   | Prom** | TFBS** | Association (reference)          | MAF_CEU | MAF_YRI | MAF_JPT | MAF_HCB |
| 842 |        |        | haplotype (Richards et al. 2006) | 0.25    | 0.03    | 0.27    | 0.22    |
| 843 |        |        | p=0.010 (Richards et al. 2006)   | 0.23    | 0.25    | 0.24    | 0.20    |
| 844 |        |        | haplotype (Richards et al. 2006) | 0.37    | 0.11    | 0.34    | 0.27    |
| 845 |        |        |                                  | 0.13    | 0.25    | 0.32    | 0.34    |
| 846 |        |        |                                  | 0.08    | 0.09    | 0.05    | 0.13    |
| 847 |        |        |                                  | 0.49    | 0.14    | 0.36    | 0.31    |
| 848 |        |        |                                  | 0.32    | 0.17    | 0.39    | 0.32    |
| 849 |        |        |                                  | 0.48    | 0.09    | 0.42    | 0.26    |
| 850 |        |        |                                  | 0.49    | 0.36    | 0.16    | 0.14    |
| 851 |        |        |                                  | 0.49    | 0.08    | 0.16    | 0.16    |
| 852 |        |        |                                  | 0.33    | 0.10    | 0.24    | 0.14    |
| 853 |        |        |                                  | 0.23    | 0.21    | 0.26    | 0.28    |
| 854 |        |        |                                  | 0.19    | 0.35    | 0.01    | 0.01    |
| 855 |        |        |                                  | 0.47    | 0.38    | 0.22    | 0.29    |
| 856 |        |        |                                  | 0.01    | 0.42    | 0.02    | 0.04    |
| 857 |        |        |                                  | 0.01    | 0.45    | 0.00    | 0.00    |
| 858 |        |        |                                  | 0.13    | 0.35    | 0.08    | 0.18    |
| 859 |        |        |                                  | 0.23    | 0.37    | 0.08    | 0.16    |
| 860 |        |        |                                  | 0.19    | 0.00    | 0.00    | 0.00    |
| 861 |        |        |                                  | 0.01    | 0.10    | 0.00    | 0.00    |
| 862 |        |        |                                  | 0.41    | 0.15    | 0.15    | 0.21    |
| 863 |        |        |                                  | 0.07    | 0.00    | 0.00    | 0.00    |
| 864 |        |        |                                  | 0.10    | 0.00    |         | 0.00    |
| 865 |        |        |                                  | 0.32    | 0.49    | 0.08    | 0.17    |
| 866 |        |        |                                  | 0.28    | 0.05    | 0.21    | 0.34    |
| 867 |        |        |                                  | 0.01    | 0.06    | 0.00    | 0.00    |
| 868 |        |        |                                  | 0.17    | 0.02    | 0.01    | 0.01    |
| 869 |        |        |                                  | 0.27    | 0.21    | 0.03    | 0.14    |
| 870 |        |        |                                  | 0.28    | 0.06    | 0.07    | 0.16    |
| 871 |        |        |                                  | 0.45    | 0.48    | 0.11    | 0.30    |
| 872 |        |        |                                  | 0.34    | 0.03    | 0.21    | 0.34    |
| 873 |        |        |                                  | 0.09    | 0.38    | 0.03    | 0.00    |
| 874 |        |        |                                  | 0.23    | 0.14    | 0.03    | 0.14    |
| 875 |        |        |                                  | 0.23    | 0.08    | 0.18    | 0.27    |
| 876 |        |        |                                  | 0.20    | 0.33    | 0.30    | 0.39    |
| 877 |        |        |                                  | 0.33    | 0.37    | 0.26    | 0.38    |
| 878 |        |        |                                  | 0.29    | 0.06    | 0.24    | 0.36    |
| 879 |        |        |                                  | 0.02    | 0.17    | 0.00    | 0.00    |
| 880 |        |        |                                  | 0.15    | 0.00    | 0.44    | 0.47    |
| 881 |        |        |                                  | 0.38    | 0.05    | 0.22    | 0.36    |
| 882 |        |        |                                  | 0.29    | 0.33    | 0.26    | 0.33    |
| 883 |        |        |                                  | 0.48    | 0.02    | 0.09    | 0.09    |

Key appears on page 109.

|     | R                                                                                                                               |
|-----|---------------------------------------------------------------------------------------------------------------------------------|
| 1   | Sequence                                                                                                                        |
| 842 | AATGGGTTGACCAGAAGTTGCATCACAGCCTTTGAAGCAAACAGAACCCCGACCCGGGTA[A/G]TCTCTTCTCCAAGAACCTGTGCCTTGCAAGCAGTTGTTTTATGAGCTGAGATGGCTT      |
| 843 | ATGGCTTCAGTGGCTGGAGGTGGGATGGTGTCTGGCAGTGTCAATCCATGCTATTCCA[C/G]TAGGTACGCTTTCTTCAACAGCCACGGTGTGTTGTTGAAGAAGGAGAAGATGGTGAAAA      |
| 844 | GCACCAGCTGCCGGGACGCTCTCCCTCTCCAGCAACCGTGGGGAGCATCCAGAATGG[T/G]CCGGAGCATGGTGTATGGCCGACTGGGGCAGTCTCCCTGCGGGCTCTTAGGGAAGGTC        |
| 845 | GTGGTTGGCATAACAACCTCAGACGGACAGCTTTTTCTCCGGCCAAATAATATCTAT[A/T]ACCCAATTACATGTACCCTGGGCTGTGGCTGACATGGCCTGGCAGAGGACGCGCCCTGT       |
| 846 | AAAACATCTGTAGTCAAAAATAAGTTACACTGATTTAGCTTGCTGCAGGAAGGAATAACA[T/C]ACATCAGAAGAGCTGTGGGACCTCTCAAAGGATAGAGTTAGGAAAGAGGACATACAGGA    |
| 847 | AGTTATAGGAGCAGATGAAAAAGTTGGAGAGAGTCACCTTCTAGCCAAGCAAAAAGATAC[A/G]CTTTTTCAAGTGGAGAAAAGACAAGGGAATAATATATGACTTGCATCATGTACAGTG      |
| 848 | ATTGGTTGAGTTTCATTTGAATGAATGAGCATCTGTGATTTGTATGTTTGAACACACTCT[T/C]GAAAAAGAATTTCTGGGTTAGGGGGCAGGCACATTTTAAAGACTTTTGGCATACTCTAAA   |
| 849 | CTTAACAATTACAGCCTTGACACTGCAGGCTGGAGGTCATTTATGCTCTTGACCAGCAGG[A/G]GCACTGATTGCAAAGATGGCAACATCAAGGCCTGGTTGCTTTTTTAAAAAAATGTGAG     |
| 850 | GCATATTGACACACAAACATTTTCTTTTACGTAATCACATCTTTTGCTTGATGGTGCCT[A/G]TCTTTGGCCTCAATGTTCAAGTCTCAAATGATAATTATTCTTTAAACCTGTAATCTT       |
| 851 | TCTCCAATAGCCTGAGCATAGAGCTCAATGTTGAGCACAGAGTGCCTGCTCAATAAATA[T/C]ACACGTCATGCAAAGTCGTTAATGTCTCAGCACATGAAGAAAACAGAGATATTTTACGA     |
| 852 | agcagcatgaaaacggactaatacaCATGCCTAGCACATGTAGGGTAAGTTCTAGTTTAA[A/G]TACAAAATGCATTGCCACAGCTGTCAGACAAGCTTTTGGTCTGCAGGAATGTGCTCACC    |
| 853 | AAATTGCCAACTTGCAGAATCTTGGGCTAAATGAACCAACAGGTCACCAATGTTGAAGT[A/G]GTTTGTATATAGTGACAGATAACTGATACAAATCTGGAAGGTAGAGAGGAAGAAAGTGT     |
| 854 | AGCAGAGTCTGCCTGTGATGGAGAGTGTGTCAGTTCTTTAAATTTGTGTCTGGTGGGGG[T/C]CAATTATTTAAATTTCTGGTTGGCATTGTGGTGGTTAAGTCCTGCTGTTAATTAATACC     |
| 855 | AATATGATGACTTAGAGATATGTTTATATTACATTGTCAAGTGAAGTGTGTATAATA[T/C]ATGTGTGATTGActtttcttttcttttcttttcttttctttctctctctCTGT             |
| 856 | GAAGGTGAGGAATAGCAGAAAGGACAGTCAGCACAAAGGAAGCAAAAATGGGGTCTGAGA[A/G]GTAAGGAACAATCAGACGATTCTAGACTTCCAGATTCCAGATTTTATCTTAAAAACAGG    |
| 857 | ttaggttcattattgcaacaagggtaccactgtgctggggatgaccatctgtagggg[A/G]gctgtgcatgtgggtggggcaggggctatatgggaactctcactcttctgttctatgt        |
| 858 | AAGCAAACAAACAAACCCCAAGAATAGTCAAGCAGCTGAGACATTCAGTAGCCTTGAG[A/G]CAAAAACAAGACATATTCTTATTGTTGGAGTATAGTTGTGTAAAGCCTGTAGCCCCCTTCT    |
| 859 | GTCTTTATAAAGTTTTGATATTAGTGTACTCTTTTTGTAGAGGAAAGAATAATTTTTT[A/T]AAATTTTTCTTGTCTGGGGCTATTTTAAATGCTGGAATTCAGTGTCTTTAAAAATG         |
| 860 | ACATTGGAAGAATGGTTAAGTAAATGTGCATTATACAATACAATGCAGCATTATGCAGC[T/C]ATTAAAAATATGTTTATGAAAACCTTCTCCATGACAGAGGATAGTACATAAGTTTAAATG    |
| 861 | CAGGTATATTGGTTAATCATAACATAAAGCCCTAGGAAGCAGAGCAAGGATTCATTAACCC[A/G]CAGGCAAGGTTAAATAAAGTACTTCTGAACACAGTGAGGTTCAAGAAACAGGTTATTTA   |
| 862 | ATCAAGGACTACCGTAATTTTCATACCAGGAAGAAAACGTCAAAATATGTCATGAGTCCA[A/G]CTAAAAACCTAGCTCAAACCATCATAGTCTCTCATCAAACCTACTAAATTGACTTCTTAA   |
| 863 | TCTTTGTGTTTTAAATGTGTCTGATGCTGTCTTCTTCATAGTTTGTAGGAGCACTAAA[T/C]GAATAGTAGAAAAGCCTGCCAGAAAAGTATTTAGTCTGAATCTATAAAGCTGTTTCTGAGC    |
| 864 | TAATTCAGAAGTGCACACAGGACTCCAGGTTTGAATGATGGGAGTTGTCTTCAAGGATTG[A/G]CAGTTGAAGCATTACCAGAGCATGGATGTGTTTTCTGAGCAAGAGCTGTCAATAATTAG    |
| 865 | GTAGACACTCAAGAAATGTATTACAGCATAAAACATGTTTATTGTTGTGGAGTATTTT[C/G]TATGAAATGTTACAAGGAAAAATATATTTTAAACCAACAAGTAATCTTTGCAAAAAAAA      |
| 866 | GTCTCAGCAGTAACAGTCCCAGTAGTAACAATGGAGAAGCATTCTTTCTCCAATACA[T/C]AAATGCATGATGGGATGGGTAGTTTTCTATCAACTTGGCTAGGCTATCATGTCCCATTAT      |
| 867 | ATTGATTTAGATGTTATGAAAATTAATAAAGTTCCAAAAGGCAGAAATAGGCTATACCA[A/G]TATTTTTAAAAATTTGTCATTGTTCAAACAATATGAATATAAAATTGAAATGTCCCTCA     |
| 868 | CAGCAAATACGTAATCCACAAGAATGTTATAAGAAAAGATATTTATCAAGCCTCAAAAAA[A/G]AAGAAAGTAATCAAAGATAAGGATGCATAAATATCTTAAAGACTACTCATGACATCAAGG   |
| 869 | GTGAAGCTGTTATTTTTCATCACAATGTGATCTATACCTAATGATTACATTACCTGTACAT[T/C]TGAAGCTCGTTCGTAACCATCGTCCCCTGAGAGTATACCTAACATAGGAAATACTATAT   |
| 870 | GGAAGAAATGAATTGATCACAGAAGCATCTAGAGCTAGGACCAATTAAGAGTCAGTTAGT[T/G]TATATGACCTATTTGAAGATTTCTCAACAATCTTGACCTATTGCTTAAAGAGCACAAACATT |
| 871 | AGAAATGGGTCTAATAGTACCTATCACACAAGATTTTCTGTGAAGATTTTGTGAGATCCT[A/G]TATATTAAGCACCCAGTGCATAGGTGTTCTCAATGTTAAATCCCCTCTCCATGTCTGAAC   |
| 872 | ATGAGAGGGAGAACAAGGTAGAAGTTCTACTCCCTTTTATGACCTGGACTGTAGCATTAT[T/C]CCTGTTACGTTCTATTGGACGAAAGTGAATCAACTTGGCTAGGCTATCATGTCCCATTAT   |
| 873 | AAATAAGGTATCATTAAATTGAATGCCTCCTCTAGGTTTTAAGCCACATCATtttaacact[T/C]acaacaagctatcaggtaggatgattttaccattttcagataaggaaattaggggtc     |
| 874 | AAGGTAGATAAAAGTCATTTAACACATAGTCCACTGAGAAGAAAATCAAATGAGGGCTG[A/T]TTTATTGATGATATTTTGGACATCCCTTCTCAATTCACATTTAGTGACATCATGTTGG      |
| 875 | AAGAGAAGACCTTCTGCAGACATCTGTGGAATTTCTCTGGGCTGCCCCACAACCTGCATC[A/G]CCATTGTTTTATTTTACCTTTTTGGTTTTTGCCTAGTGTTCATTCACTTCCCTCCATA     |
| 876 | GAACAGCTTCTCTTATCGTGTCAATTGCCACATTTATGCCAGCTGGTTGCAAGAAGTGGA[T/C]ATCCCTCAAACCTAAAACAGGGGCCCACTTTGATGCTGCTATACAGATAGAAAAAACCA    |
| 877 | GGATACGTAAGGCTGCTGCTGTTGCTTTGCCAATTGAACATGAACGTGCAAATGGAACC[A/T]GCCTCTGAAGGATGCTCTAAAACCTTGGGCTTGCTAAATTGGCTGCTATTGTAAGAAAA     |
| 878 | TAAAATGCTTTTTATTTTTCATCTATTTTCTTTCACACAGCAGTACTTTATCTTCTTTTAT[A/G]TCCACTAAATGTATGAAATGTATGTTGTTTTTCACTGTATGTTGATGGAGATATGGG     |
| 879 | AAGCTGGAAGTGTATGGTTATTTACAAAATCTGGGATGTTGTTTTGGCTTTGTGTTA[T/C]AATTGCAGCTACGAAAACCTAAAAGTGAACAAATGCTTTTCTCATTTAATTTCTTTTTATCA    |
| 880 | GAGGAAACAAATTTAAGGCAAGATTCTGAATGACAGTTCTGTATTCTACAAACCTTTGCT[A/G]ATGAAAGGGAAGATGATGATTTTCAATGTAGGTCATGGCCTGAAAGTGGAGAATTTCTGAA  |
| 881 | GCCTGGTATTCTGACTAGCCCTGAGGACTCATGGCAAGTGTGAAATGGACACAGCCCTC[A/G]CACACCTTTTGGTCAAATATGGAGACTTAGCGGCCACAGAGCATCATTCTAGAGTCAAT     |
| 882 | AGCTCTGGGAATGTGAGCATCAGTTATGAATATAGGTCATCTCAGTTTGTGCACAGCACA[T/C]TTTCTGTGAGTCCAATATAAACTTGTATGAGTAGATCTGTTTATTGTGATAACTACAAC    |
| 883 | GATATAGAAGGAAGATTGAGTTAAGAGTATCAGCAGCAAAGTGACAGAAACGCTCATA[A/G]TAAAAACTAAAATTAGACTTAATTGTTTATAGGTGGGAGGAGCCTATTACTTTTGGTG       |

Complete list of all 94 genes and 1,536 SNPs present on the COGS SNP Chip

|     | A        | B         | C             | D            | E         | F     | G          | H             | I      | J      |
|-----|----------|-----------|---------------|--------------|-----------|-------|------------|---------------|--------|--------|
| 1   | Cytoband | Gene Name | Gene Alias    | Description  | Size (kb) | Chrom | SNP ID     | Position (bp) | htSNP* | Coding |
| 884 | 8p12     | NRG1      | GGF, HRG, NDF | neuregulin 1 | 1,124.6   | 8     | rs11776959 | 32068406      | T      |        |
| 885 | 8p12     | NRG1      | GGF, HRG, NDF | neuregulin 1 | 1,124.6   | 8     | rs9297186  | 32079918      | T      |        |
| 886 | 8p12     | NRG1      | GGF, HRG, NDF | neuregulin 1 | 1,124.6   | 8     | rs1481756  | 32086787      | T      |        |
| 887 | 8p12     | NRG1      | GGF, HRG, NDF | neuregulin 1 | 1,124.6   | 8     | rs1481762  | 32110769      | T      |        |
| 888 | 8p12     | NRG1      | GGF, HRG, NDF | neuregulin 1 | 1,124.6   | 8     | rs1481763  | 32113352      | T      |        |
| 889 | 8p12     | NRG1      | GGF, HRG, NDF | neuregulin 1 | 1,124.6   | 8     | rs6468085  | 32120207      | T      |        |
| 890 | 8p12     | NRG1      | GGF, HRG, NDF | neuregulin 1 | 1,124.6   | 8     | rs1383964  | 32123716      | T      |        |
| 891 | 8p12     | NRG1      | GGF, HRG, NDF | neuregulin 1 | 1,124.6   | 8     | rs4733299  | 32136282      | T      |        |
| 892 | 8p12     | NRG1      | GGF, HRG, NDF | neuregulin 1 | 1,124.6   | 8     | rs7002832  | 32173915      | T      |        |
| 893 | 8p12     | NRG1      | GGF, HRG, NDF | neuregulin 1 | 1,124.6   | 8     | rs10110401 | 32175992      | T      |        |
| 894 | 8p12     | NRG1      | GGF, HRG, NDF | neuregulin 1 | 1,124.6   | 8     | rs7001060  | 32186009      | T      |        |
| 895 | 8p12     | NRG1      | GGF, HRG, NDF | neuregulin 1 | 1,124.6   | 8     | rs6468090  | 32195591      | T      |        |
| 896 | 8p12     | NRG1      | GGF, HRG, NDF | neuregulin 1 | 1,124.6   | 8     | rs12549243 | 32200083      | T      |        |
| 897 | 8p12     | NRG1      | GGF, HRG, NDF | neuregulin 1 | 1,124.6   | 8     | rs11782156 | 32216518      | T      |        |
| 898 | 8p12     | NRG1      | GGF, HRG, NDF | neuregulin 1 | 1,124.6   | 8     | rs1351510  | 32223600      | T      |        |
| 899 | 8p12     | NRG1      | GGF, HRG, NDF | neuregulin 1 | 1,124.6   | 8     | rs12680804 | 32235936      | T      |        |
| 900 | 8p12     | NRG1      | GGF, HRG, NDF | neuregulin 1 | 1,124.6   | 8     | rs1531746  | 32238717      | T      |        |
| 901 | 8p12     | NRG1      | GGF, HRG, NDF | neuregulin 1 | 1,124.6   | 8     | rs1159631  | 32244856      | T      |        |
| 902 | 8p12     | NRG1      | GGF, HRG, NDF | neuregulin 1 | 1,124.6   | 8     | rs1481758  | 32251340      | T      |        |
| 903 | 8p12     | NRG1      | GGF, HRG, NDF | neuregulin 1 | 1,124.6   | 8     | rs7822564  | 32252424      | T      |        |
| 904 | 8p12     | NRG1      | GGF, HRG, NDF | neuregulin 1 | 1,124.6   | 8     | rs901561   | 32263004      | T      |        |
| 905 | 8p12     | NRG1      | GGF, HRG, NDF | neuregulin 1 | 1,124.6   | 8     | rs11782374 | 32269498      | T      |        |
| 906 | 8p12     | NRG1      | GGF, HRG, NDF | neuregulin 1 | 1,124.6   | 8     | rs10503903 | 32272475      | T      |        |
| 907 | 8p12     | NRG1      | GGF, HRG, NDF | neuregulin 1 | 1,124.6   | 8     | rs7818821  | 32272706      | T      |        |
| 908 | 8p12     | NRG1      | GGF, HRG, NDF | neuregulin 1 | 1,124.6   | 8     | rs6468095  | 32284018      | T      |        |
| 909 | 8p12     | NRG1      | GGF, HRG, NDF | neuregulin 1 | 1,124.6   | 8     | rs10503904 | 32284229      | T      |        |
| 910 | 8p12     | NRG1      | GGF, HRG, NDF | neuregulin 1 | 1,124.6   | 8     | rs7005124  | 32287272      | T      |        |
| 911 | 8p12     | NRG1      | GGF, HRG, NDF | neuregulin 1 | 1,124.6   | 8     | rs10503905 | 32287870      | T      |        |
| 912 | 8p12     | NRG1      | GGF, HRG, NDF | neuregulin 1 | 1,124.6   | 8     | rs4317533  | 32290309      | T      |        |
| 913 | 8p12     | NRG1      | GGF, HRG, NDF | neuregulin 1 | 1,124.6   | 8     | rs10503906 | 32291504      | T      |        |
| 914 | 8p12     | NRG1      | GGF, HRG, NDF | neuregulin 1 | 1,124.6   | 8     | rs10503907 | 32291552      | T      |        |
| 915 | 8p12     | NRG1      | GGF, HRG, NDF | neuregulin 1 | 1,124.6   | 8     | rs1545961  | 32292898      | T      |        |
| 916 | 8p12     | NRG1      | GGF, HRG, NDF | neuregulin 1 | 1,124.6   | 8     | rs1386440  | 32297073      | T      |        |
| 917 | 8p12     | NRG1      | GGF, HRG, NDF | neuregulin 1 | 1,124.6   | 8     | rs7010701  | 32301673      | T      |        |
| 918 | 8p12     | NRG1      | GGF, HRG, NDF | neuregulin 1 | 1,124.6   | 8     | rs1948098  | 32304474      | T      |        |
| 919 | 8p12     | NRG1      | GGF, HRG, NDF | neuregulin 1 | 1,124.6   | 8     | rs2008626  | 32308921      | T      |        |
| 920 | 8p12     | NRG1      | GGF, HRG, NDF | neuregulin 1 | 1,124.6   | 8     | rs1565031  | 32320677      | T      |        |
| 921 | 8p12     | NRG1      | GGF, HRG, NDF | neuregulin 1 | 1,124.6   | 8     | rs10091429 | 32324547      | T      |        |
| 922 | 8p12     | NRG1      | GGF, HRG, NDF | neuregulin 1 | 1,124.6   | 8     | rs1714420  | 32340954      | T      |        |
| 923 | 8p12     | NRG1      | GGF, HRG, NDF | neuregulin 1 | 1,124.6   | 8     | rs7834123  | 32342748      | T      |        |
| 924 | 8p12     | NRG1      | GGF, HRG, NDF | neuregulin 1 | 1,124.6   | 8     | rs6468099  | 32346583      | T      |        |
| 925 | 8p12     | NRG1      | GGF, HRG, NDF | neuregulin 1 | 1,124.6   | 8     | rs6992907  | 32347468      | T      |        |

Key appears on page 109.



|     | K      | L      | M                       | N       | O       | P       | Q       |
|-----|--------|--------|-------------------------|---------|---------|---------|---------|
| 1   | Prom** | TFBS** | Association (reference) | MAF_CEU | MAF_YRI | MAF_JPT | MAF_HCB |
| 884 |        |        |                         | 0.44    | 0.16    | 0.24    | 0.17    |
| 885 |        |        |                         | 0.08    | 0.38    | 0.21    | 0.34    |
| 886 |        |        |                         | 0.42    | 0.36    | 0.22    | 0.17    |
| 887 |        |        |                         | 0.45    | 0.22    | 0.39    | 0.48    |
| 888 |        |        |                         | 0.46    | 0.25    | 0.09    | 0.08    |
| 889 |        |        |                         | 0.13    | 0.17    | 0.18    | 0.28    |
| 890 |        |        |                         | 0.45    | 0.19    | 0.11    | 0.11    |
| 891 |        |        |                         | 0.07    | 0.00    | 0.23    | 0.29    |
| 892 |        |        |                         | 0.08    | 0.00    | 0.00    | 0.00    |
| 893 |        |        |                         | 0.01    | 0.14    | 0.03    | 0.02    |
| 894 |        |        |                         | 0.09    | 0.13    | 0.27    | 0.29    |
| 895 |        |        |                         | 0.22    | 0.02    | 0.47    | 0.49    |
| 896 |        |        |                         | 0.07    | 0.06    | 0.21    | 0.28    |
| 897 |        |        |                         | 0.46    | 0.28    | 0.14    | 0.18    |
| 898 |        |        |                         | 0.30    | 0.02    | 0.40    | 0.49    |
| 899 |        |        |                         | 0.13    | 0.30    |         | 0.21    |
| 900 |        |        |                         | 0.37    | 0.04    | 0.25    | 0.33    |
| 901 |        |        |                         | 0.03    | 0.00    | 0.00    | 0.00    |
| 902 |        |        |                         | 0.20    | 0.07    | 0.50    | 0.43    |
| 903 |        |        |                         | 0.38    | 0.13    | 0.19    | 0.14    |
| 904 |        |        |                         | 0.38    | 0.02    | 0.15    | 0.18    |
| 905 |        |        |                         | 0.08    | 0.00    | 0.00    | 0.00    |
| 906 |        |        |                         | 0.07    | 0.04    | 0.01    | 0.02    |
| 907 |        |        |                         | 0.23    | 0.39    |         | 0.08    |
| 908 |        |        |                         | 0.17    | 0.14    | 0.16    | 0.24    |
| 909 |        |        |                         | 0.09    | 0.00    | 0.07    | 0.10    |
| 910 |        |        |                         | 0.43    | 0.11    | 0.14    | 0.14    |
| 911 |        |        |                         | 0.07    | 0.00    | 0.09    | 0.13    |
| 912 |        |        |                         | 0.41    | 0.28    | 0.31    | 0.40    |
| 913 |        |        |                         | 0.17    | 0.02    | 0.14    | 0.07    |
| 914 |        |        |                         | 0.37    | 0.23    | 0.16    | 0.19    |
| 915 |        |        |                         | 0.38    | 0.04    | 0.35    | 0.40    |
| 916 |        |        |                         | 0.31    | 0.33    | 0.24    | 0.26    |
| 917 |        |        |                         | 0.12    | 0.33    | 0.00    | 0.00    |
| 918 |        |        |                         | 0.35    | 0.22    | 0.22    | 0.19    |
| 919 |        |        |                         | 0.04    | 0.23    | 0.00    | 0.00    |
| 920 |        |        |                         | 0.15    | 0.18    | 0.05    | 0.10    |
| 921 |        |        |                         | 0.35    | 0.33    | 0.47    | 0.32    |
| 922 |        |        |                         | 0.08    | 0.31    | 0.46    | 0.41    |
| 923 |        |        |                         | 0.08    | 0.21    | 0.00    | 0.00    |
| 924 |        |        |                         | 0.29    | 0.28    | 0.01    | 0.01    |
| 925 |        |        |                         | 0.43    | 0.48    | 0.33    | 0.26    |

Key appears on page 109.

|     | R                                                                                                                               |
|-----|---------------------------------------------------------------------------------------------------------------------------------|
| 1   | Sequence                                                                                                                        |
| 884 | AAAAAGAAGTAATTGGATGAGGTGATTTATGTAATTCCTACAACCTCTCAGTGCTAACAA[A/G]GCAACATTCAATGACATTTACAATGATCATGGTGGCAAGTTGGGAGAGAGAAAGGGCATT   |
| 885 | TTAGTGGGAGTAATAGCATTGAATGCCCTCCATGCTCACTGGAACCTTCATCCACAATTAC[A/C]ATGCTCTGGTGGCTTTCTAAGTTTTTTTTAATTTTTAATTTCTAATTTTTGTAGGTACA   |
| 886 | TTCCCTGAAGCTTTCTCATCAACCCAAGAAGCTGAAGGGGAAAATGAAAGTTCCCCTT[C/A/G]TTCCTCCCAATCAAGAGTAATGAGACCAACATCATTGATGATTAATAATATGAC         |
| 887 | TACGAAAACCTAGATTTATGAAAAGGCCCATGGATTTACATCTATTATATCATCTCCTGT[T/C]GGTTTGAGAATGAAATGTTTGTCTAATATGTTTTCTGATTAAGAAAGTGGAGGCAG       |
| 888 | ATATTCAGATTCCCTTAAGCGCATGGTTCCCTCTCCTATAATACAAACCTCTTGACAGTACT[T/G]TTGTCACCTGGCCCTTTTCATATCACCCCTGTGAGGAGTGGGGCCAGAGAACCTACACAA |
| 889 | AAGTCAACTGTTGGTCCACCAGGCCTCTAAGCTGCAGCCTCTGTGACCTGGGGACAGTG[A/G]GATCCATGTGACTTGCCTGCTACTGCCCTTGATTGGGCAGATCACAGAGCAGATGGCCTG    |
| 890 | CACAAAAGGGTTGAGACCTTTAATTAATCAAAAAATTGACCATTCCCTGAACCTTGATTG[T/C]TTGGTATCATTAAACAAAGGACATGAGACAACATGTTCAAGCTTTATAATTTGCTGAAAT   |
| 891 | AGCTTAGCCACGATCGTATAAAAAAATAAATGTTGGTTAATTTCTAAAGTACATTGATTG[T/C]TTTGTGTTTTGTTTTAAGAAAAAGGCTTGGCCGGGCGCGGTGGCTCACGCCTGTAATCCC   |
| 892 | GTCTTAGGCTTCCCTTATAGTCTAGCATGATATTATTCTATTTTATATG[T/C]TTGCTCCCTTGAGTGTGTTAGAAAGACTGCTAGATTTTATGTTTCTAAAGCTGGTTTT                |
| 893 | ATATATCTTAATATATATATATCTTATTATATGCTTATTTCATTGTTATGAAAACC[T/G]AGCTTTCTTCTTCTATCCTTTCAATATTATGCTACTTGTATTTAGTATTTACATTGTA         |
| 894 | ATTTTTGTTTTCTTATACATACCTTCCAATATTGTCAAAATTTCAATAAAGCATGCA[T/G]AGCCTAATATATCATGTAGATGAGTGCAAAATGAACACAGAGATTAAGATCATGGGCTTT      |
| 895 | TAAAGTCTGATAATTTAATTTGTCTAAAGTTTTCTTTAACACGACCAAGAGTCACAGA[T/C]TGCTTAGTCTGGAGAAGCTACTCTTGGCTCTATGCAGTCCACAAAAATGACATTTAGAA      |
| 896 | ATCAATCAAAGAGAGACAATGGCATTCTCTCAAAGATCAGATGTTTTGTAGTGCAACTAT[A/G]TTGTTCTGTTTTCTTACTTCAATTATCAGATAGACAGGAAAAAATACAACAAAAATAGC    |
| 897 | AATGTTAAGCAATAAACTTTAGGAAACAACAGGAGAAAATGATGAGGACCTAAAGCTA[T/G]GTGAAGAACTTCTAGACTTGATACTAAAAGTATGATTTTCATTTAATGAATTTAAAA        |
| 898 | AATTTTGCTTTGTGGTCTTCCCTGAAAGCTCTTACAAATCTAGCTGTAGTCTTTGTCT[T/C]AACAAAGGATTATCTCAGAGCCCCATGGCAAAGCTCTATGCCAGGTACTTTTCATTTGGG     |
| 899 | AGCCAAAACATATCAGGTACAAACAAATAGTGGAGTTAAAAATCAAACATGGACCATCTG[C/G]CTCTGTAGTCCAGGCCCTTAACCACTACATTATATAACCTCTTGAGAGAGGAAAACTTAG   |
| 900 | CTTGTTCCCCACCCAAAATCTATTGAATCAGAATCTCTAGGGAGTGAGGACCAACAGTTG[T/C]GCTTTAACACCTCCACTCCCCCTTGATTGGACGGTAAAGGCCAGAAAAGATTACCTT      |
| 901 | GTCACCCAAAATCCATGGGAAAATGCACGATGGTTTTCTATGAAATGGTGCATAAATA[T/C]AGGTATAACATAAGGAAGAGATGAACATCAGCTCCATTTTAGGAGAGAAAGAAAACAAT      |
| 902 | AGTTATGTTACATGCAACTCCAAAGCCTCCACAGCTGTTGTCTACTCTCCATTCAAAA[T/C]AATGCACGTGCAACTTTCCCTTGTTGGCTGGCTTCGTCCTCCACACACCAATGCTTTGTGT    |
| 903 | CAAAATAACACAAAATGCTTGCTCTCATGAACCTGGAGACAGACGGTAAGAATATACAGC[A/G]ATAGGCAACATGGTAGGTGGGGATGAGTGCTCTGAATTTAAATAAGGCAGGACACAGAGA   |
| 904 | AAGTTAATTGACTACAGACATATGCAAGAGAGCTCTCAATTGAGCCATAAGATCTTTTGG[A/G]ATGTGGGTGTTTACAAGGTAGCTATAAGCACTCTCATAAGTACTGCACCTGTGAATCATG   |
| 905 | TTGGTGATATGAAGAAAACCATATGTGATAGATTCTAAATATATAACCACAAAAGCCAAA[A/C]TGACGGTTTGAACATCTCAGCAACTATTATTGATTACTACAGTTGAAGAGGTTGAATCA    |
| 906 | AGAGTGAACCCACAGAAGAGATTCTGATGAAACTGAAAGTGGATTGGTAGGAAAATGCT[T/G]TACAATAATCTCTACTACTTGGCTTTTCATGTAGGGGTTTGGGAATTAGTCTCTTATTCT    |
| 907 | GAAGACATTTCCATGATGGCATTGTTGCTTTCTATCTCCAGGGAAAGTCAAGTATTGG[A/G]AAGAATTTAAAGAGACTTGGGCTGAGTGCAGTGGCTCACGCCTGTAATCCCAGCACTTT      |
| 908 | CCTTTTGCTTTTACAACTTAAATTTAATTGAAATTTAATCCCTAGCAGGTTTTAATAA[T/C]GGGCAGCTTTTGGAGACTTAAAAACATTTGCTCTCACTTCCCAGATAAGGAGGTTGTCCA     |
| 909 | GTGTAGTCAACTCCCCTTATGGAATCCATTGATAAATCATGGCAAAAGGAAACCCTT[A/G]TGGAAATAACGTCTAAAGGAGACCCTTTTATCCCGGAGAGGAAAACCAGAGAGCAGTCA       |
| 910 | TGCTAATGCCCTCAAACAAGGCAAACATTTTGTGAATAATTTTTAGATAATATATGACGG[T/G]TTGGATCTTTGGTTTTGTTGTTTTGAATGGAATGCATAGAAAAAAGAACTTGTTTCAACA   |
| 911 | ACCTCATTTGAAAGTCCAGGCTTCTCAGCTTGATGTCCAAGTTCTCCATGACACATATC[T/C]TCTTGAGCACTTCACTTTCATGCCCGACCAAGCTTGGACTTCTTCCCCCTCACATGCTTG    |
| 912 | AGCATCACAGTATAAAGACTTAAGTTCTAAGAGTTGATATTGCTGTAGATGTTGGGAATG[A/G]AATCTTAGGAGTAACCTTTACCGGAGGCAACTTCTACTGCCCTTGCTACCTTTGGTGTGA   |
| 913 | TAGCATTGTGCTGATGCAATTCTGTTCCAGATAACCGAGGGAGGGAATGGCGGTCTCGC[A/G]TGAAGACTAAGTAGACGTGCTATTACCCTCCTCGGTTGGCTCCAGCAATAAGCCTAATGA    |
| 914 | GGCGTCTCGCGTGAAGACTAAGTAGACGTGCTATTACCCTCCTCGGTTGGCTCCAGCA[A/G]TAAAGCTAATGACCTCTACAAAGCTGTTCTGTAATACAGAAGTAAACACTTACTCTGCAC     |
| 915 | ACAGTGTCCAGCAGACTGGCAGGGACCTGATATGAACATCACAGAGGAAAAAACACATA[T/C]GAAACAATTAATGCTTGCCATTGGGCCAAATGCTTTGTATGTTATTTTCAATTTATATTT    |
| 916 | GCTCACAGTCGTACAGCTCTAAGTAGCAGACCTGGGCTTAAACCAGGTTATCCTGGG[T/C]CAAAATCTTAGGTTCTTTACATATCCTATTCTTCTCCTGGGGCTAAGGTCACGCACTA        |
| 917 | GGATTCTGGGAATCAAATAATCTTCCCAGCACAAAATTTGATGAGAGAATACTTTAAT[A/G]TCTGTGGTTGCAGAATAAATATGATTAAGTCTGAGGATTCTGCACTGCAATTGAATATGT     |
| 918 | ATATTGAAGCTAGTTTTAAGATACAGTCTAAGCAGAAAAGAGCAGAGACTATAACTTTCC[A/G]TGGCAGAAGCACTCCAAGACTCAAGATGCTAAAGCAATGTTGTGACTGATTTCTTTTCT    |
| 919 | TGACCTAGCCTTGAATATCTCAATTAGGAAGTTACACACGTGTCTGGGCTTTTCAAATG[T/C]TTGCATGCCATTAATCAGCATCTTACATCAGCTTGCTCAATGAATGATGACTATGTCAAA    |
| 920 | GACCTAATAAGCAGATTTGCAGAGCCATAACCTTGCTGGCTTATGTCAGCTCGAAGTAAA[A/G]GGGGAGGTGGTAGTGGTGAATCTGTTTTTATTACTCAGTGTTAATCATAATGAATCAGA    |
| 921 | TAGTCTCAATACATATTAACAGAAAGTCAAGTGTCAACTCACCTGCACCTCACACAGTAAA[T/C]TGATTTAGGCATCTCAGATTCTAACTCTTAGGTTAACACCTCATATAGTAATGAAAG     |
| 922 | TCTACAAGATTAACACAAGTATATAGTTATATAATTTCAAGATCAAAATATAGAAAAGT[T/C]CCACAACCCCTCATAATTTCTTCACTTCACTTGTAAATAACTCCTCCCAATCCCAACCCC    |
| 923 | AATATTTTAGACTTCATGGATGATACAGTCTTGGGGCAGCTACTCAACTCTGGCCTTGGG[T/C]GAAAAAGCAGCCACAGACAGCACAAAAACCAATGGGCATAACTGTGATCCGGTAAAGCTG   |
| 924 | GGTATTGAGAAGAAGATGGTTTCTCTTGGAACTTGGCCAACCTGGCTCACAGCGAACGTG[C/G]TGTGGACTCTTACCAGCTCTCTAGTATGCTAAGGGCCCCCAACCAGGGACCTGAAGG      |
| 925 | ATTGGTAGCAATGGACTGTTACGAGAGCAAATGATATTTGCAGAGCTGAGAGTGTGAC[T/C]TGCTTCAATTTTGAATCCCTATCTACAAAAGCATTGAAAAAGGAAGATCTGGAGCC         |

Complete list of all 94 genes and 1,536 SNPs present on the COGS SNP Chip

|     | A        | B         | C             | D            | E         | F     | G          | H             | I      | J        |
|-----|----------|-----------|---------------|--------------|-----------|-------|------------|---------------|--------|----------|
| 1   | Cytoband | Gene Name | Gene Alias    | Description  | Size (kb) | Chrom | SNP ID     | Position (bp) | htSNP* | Coding   |
| 926 | 8p12     | NRG1      | GGF, HRG, NDF | neuregulin 1 | 1,124.6   | 8     | rs10503913 | 32353655      | T      |          |
| 927 | 8p12     | NRG1      | GGF, HRG, NDF | neuregulin 1 | 1,124.6   | 8     | rs2347508  | 32358707      | T      |          |
| 928 | 8p12     | NRG1      | GGF, HRG, NDF | neuregulin 1 | 1,124.6   | 8     | rs2347509  | 32360960      | T      |          |
| 929 | 8p12     | NRG1      | GGF, HRG, NDF | neuregulin 1 | 1,124.6   | 8     | rs4373483  | 32361621      | T      |          |
| 930 | 8p12     | NRG1      | GGF, HRG, NDF | neuregulin 1 | 1,124.6   | 8     | rs939077   | 32365080      | T      |          |
| 931 | 8p12     | NRG1      | GGF, HRG, NDF | neuregulin 1 | 1,124.6   | 8     | rs6986716  | 32367281      | T      |          |
| 932 | 8p12     | NRG1      | GGF, HRG, NDF | neuregulin 1 | 1,124.6   | 8     | rs10101959 | 32372076      | T      |          |
| 933 | 8p12     | NRG1      | GGF, HRG, NDF | neuregulin 1 | 1,124.6   | 8     | rs10503914 | 32400369      | T      |          |
| 934 | 8p12     | NRG1      | GGF, HRG, NDF | neuregulin 1 | 1,124.6   | 8     | rs9918832  | 32402139      | T      |          |
| 935 | 8p12     | NRG1      | GGF, HRG, NDF | neuregulin 1 | 1,124.6   | 8     | rs11782671 | 32410143      | T      |          |
| 936 | 8p12     | NRG1      | GGF, HRG, NDF | neuregulin 1 | 1,124.6   | 8     | rs2347501  | 32413693      | T      |          |
| 937 | 8p12     | NRG1      | GGF, HRG, NDF | neuregulin 1 | 1,124.6   | 8     | rs10103930 | 32425497      | T      |          |
| 938 | 8p12     | NRG1      | GGF, HRG, NDF | neuregulin 1 | 1,124.6   | 8     | rs7842667  | 32446897      | T      |          |
| 939 | 8p12     | NRG1      | GGF, HRG, NDF | neuregulin 1 | 1,124.6   | 8     | rs7001605  | 32466789      | T      |          |
| 940 | 8p12     | NRG1      | GGF, HRG, NDF | neuregulin 1 | 1,124.6   | 8     | rs4733342  | 32468778      | T      |          |
| 941 | 8p12     | NRG1      | GGF, HRG, NDF | neuregulin 1 | 1,124.6   | 8     | rs7844425  | 32495159      | T      |          |
| 942 | 8p12     | NRG1      | GGF, HRG, NDF | neuregulin 1 | 1,124.6   | 8     | rs4733348  | 32496353      | T      |          |
| 943 | 8p12     | NRG1      | GGF, HRG, NDF | neuregulin 1 | 1,124.6   | 8     | rs10113593 | 32510900      | T      |          |
| 944 | 8p12     | NRG1      | GGF, HRG, NDF | neuregulin 1 | 1,124.6   | 8     | rs10503919 | 32519284      | T      |          |
| 945 | 8p12     | NRG1      | GGF, HRG, NDF | neuregulin 1 | 1,124.6   | 8     | rs7000590  | 32520170      | T      |          |
| 946 | 8p12     | NRG1      | GGF, HRG, NDF | neuregulin 1 | 1,124.6   | 8     | rs4733130  | 32526536      | T      |          |
| 947 | 8p12     | NRG1      | GGF, HRG, NDF | neuregulin 1 | 1,124.6   | 8     | rs2439312  | 32531901      | T      |          |
| 948 | 8p12     | NRG1      | GGF, HRG, NDF | neuregulin 1 | 1,124.6   | 8     | rs11776203 | 32538661      | T      |          |
| 949 | 8p12     | NRG1      | GGF, HRG, NDF | neuregulin 1 | 1,124.6   | 8     | rs10104033 | 32542822      | T      |          |
| 950 | 8p12     | NRG1      | GGF, HRG, NDF | neuregulin 1 | 1,124.6   | 8     | rs10503920 | 32548231      | T      |          |
| 951 | 8p12     | NRG1      | GGF, HRG, NDF | neuregulin 1 | 1,124.6   | 8     | rs7826436  | 32559476      | T      |          |
| 952 | 8p12     | NRG1      | GGF, HRG, NDF | neuregulin 1 | 1,124.6   | 8     | rs10503921 | 32560877      | T      |          |
| 953 | 8p12     | NRG1      | GGF, HRG, NDF | neuregulin 1 | 1,124.6   | 8     | rs3924999  | 32572900      | T      | Arg38Gln |
| 954 | 8p12     | NRG1      | GGF, HRG, NDF | neuregulin 1 | 1,124.6   | 8     | rs10954864 | 32581039      | T      |          |
| 955 | 8p12     | NRG1      | GGF, HRG, NDF | neuregulin 1 | 1,124.6   | 8     | rs2439282  | 32582243      | T      |          |
| 956 | 8p12     | NRG1      | GGF, HRG, NDF | neuregulin 1 | 1,124.6   | 8     | rs2439281  | 32585096      | T      |          |
| 957 | 8p12     | NRG1      | GGF, HRG, NDF | neuregulin 1 | 1,124.6   | 8     | rs6996203  | 32587559      | T      |          |
| 958 | 8p12     | NRG1      | GGF, HRG, NDF | neuregulin 1 | 1,124.6   | 8     | rs12547858 | 32606595      | T      |          |
| 959 | 8p12     | NRG1      | GGF, HRG, NDF | neuregulin 1 | 1,124.6   | 8     | rs2439273  | 32609852      | T      |          |
| 960 | 8p12     | NRG1      | GGF, HRG, NDF | neuregulin 1 | 1,124.6   | 8     | rs10098373 | 32612127      | T      |          |
| 961 | 8p12     | NRG1      | GGF, HRG, NDF | neuregulin 1 | 1,124.6   | 8     | rs7825588  | 32623943      | T      |          |
| 962 | 8p12     | NRG1      | GGF, HRG, NDF | neuregulin 1 | 1,124.6   | 8     | rs13259346 | 32630548      | T      |          |
| 963 | 8p12     | NRG1      | GGF, HRG, NDF | neuregulin 1 | 1,124.6   | 8     | rs2466052  | 32631182      | T      |          |
| 964 | 8p12     | NRG1      | GGF, HRG, NDF | neuregulin 1 | 1,124.6   | 8     | rs2466046  | 32636704      | T      |          |
| 965 | 8p12     | NRG1      | GGF, HRG, NDF | neuregulin 1 | 1,124.6   | 8     | rs2439324  | 32638195      | T      |          |
| 966 | 8p12     | NRG1      | GGF, HRG, NDF | neuregulin 1 | 1,124.6   | 8     | rs6468122  | 32658869      | T      |          |
| 967 | 8p12     | NRG1      | GGF, HRG, NDF | neuregulin 1 | 1,124.6   | 8     | rs9297195  | 32658983      | T      |          |

Key appears on page 109.

Complete list of all 94 genes and 1,536 SNPs present on the COGS SNP Chip

|     | K      | L      | M                       | N       | O       | P       | Q       |
|-----|--------|--------|-------------------------|---------|---------|---------|---------|
| 1   | Prom** | TFBS** | Association (reference) | MAF_CEU | MAF_YRI | MAF_JPT | MAF_HCB |
| 926 |        |        |                         | 0.15    | 0.16    | 0.21    | 0.18    |
| 927 |        |        |                         | 0.04    | 0.18    | 0.00    | 0.00    |
| 928 |        |        |                         | 0.06    | 0.13    | 0.48    | 0.40    |
| 929 |        |        |                         | 0.43    | 0.45    | 0.48    | 0.40    |
| 930 |        |        |                         | 0.47    | 0.18    | 0.30    | 0.23    |
| 931 |        |        |                         | 0.16    | 0.38    | 0.35    | 0.24    |
| 932 |        |        |                         | 0.33    | 0.25    | 0.00    | 0.00    |
| 933 |        |        |                         | 0.18    | 0.01    | 0.00    | 0.00    |
| 934 |        |        |                         | 0.22    | 0.26    | 0.28    | 0.21    |
| 935 |        |        |                         | 0.28    | 0.46    | 0.30    | 0.24    |
| 936 |        |        |                         | 0.19    | 0.45    | 0.16    | 0.17    |
| 937 |        |        |                         | 0.42    | 0.47    | 0.18    | 0.16    |
| 938 |        |        |                         | 0.29    | 0.38    | 0.03    | 0.09    |
| 939 |        |        |                         | 0.43    | 0.43    | 0.17    | 0.20    |
| 940 |        |        |                         | 0.13    | 0.09    | 0.11    | 0.12    |
| 941 |        |        |                         | 0.33    | 0.14    | 0.18    | 0.13    |
| 942 |        |        |                         | 0.13    | 0.00    | 0.14    | 0.11    |
| 943 |        |        |                         | 0.02    | 0.18    | 0.38    | 0.36    |
| 944 |        |        |                         | 0.18    | 0.03    | 0.00    | 0.01    |
| 945 |        |        |                         | 0.34    | 0.47    | 0.06    | 0.10    |
| 946 |        |        |                         | 0.42    | 0.13    | 0.28    | 0.13    |
| 947 |        |        |                         | 0.22    | 0.38    | 0.08    | 0.18    |
| 948 |        |        |                         | 0.25    | 0.00    | 0.09    | 0.02    |
| 949 |        |        |                         | 0.40    | 0.43    | 0.19    | 0.12    |
| 950 |        |        |                         | 0.30    | 0.09    | 0.28    | 0.16    |
| 951 |        |        |                         | 0.27    | 0.25    | 0.25    | 0.14    |
| 952 |        |        |                         | 0.22    | 0.23    | 0.24    | 0.16    |
| 953 |        |        |                         | 0.36    | 0.02    | 0.19    | 0.21    |
| 954 |        |        |                         | 0.49    | 0.39    | 0.18    | 0.18    |
| 955 |        |        |                         | 0.13    | 0.41    | 0.01    | 0.03    |
| 956 |        |        |                         | 0.43    | 0.10    | 0.15    | 0.14    |
| 957 |        |        |                         | 0.08    | 0.00    | 0.00    | 0.00    |
| 958 |        |        |                         | 0.19    | 0.00    | 0.22    | 0.12    |
| 959 |        |        |                         | 0.18    | 0.24    | 0.05    | 0.11    |
| 960 |        |        |                         | 0.49    | 0.43    | 0.16    | 0.14    |
| 961 |        |        |                         | 0.08    | 0.18    | 0.00    | 0.00    |
| 962 |        |        |                         | 0.46    | 0.13    | 0.15    | 0.12    |
| 963 |        |        |                         | 0.03    | 0.17    | 0.33    | 0.33    |
| 964 |        |        |                         | 0.43    | 0.33    | 0.25    | 0.19    |
| 965 |        |        |                         | 0.02    | 0.09    | 0.00    | 0.00    |
| 966 |        |        |                         | 0.33    | 0.10    | 0.15    | 0.10    |
| 967 |        |        |                         | 0.15    | 0.18    | 0.00    | 0.00    |

Key appears on page 109.

|     | R                                                                                                                                |
|-----|----------------------------------------------------------------------------------------------------------------------------------|
| 1   | Sequence                                                                                                                         |
| 926 | TGCTTTGGAATGGAGTTTATTGCCACTAAAGATGCTAAGCTGGAAAAATATAAATTGGG[A/G]CTATCCATTGGCTAAATCCCTGCCCTGAGGAGCAGGCCTGTCTCCAGTGGGAGGAAGAA      |
| 927 | TGATAAATACTGGGGACCAAATTACCTTTTAAAATTATATTTAAGCCTACTAAACAACAA[T/C]TTCTGAGTTAACAAATTAAGACAAATAAAGAATGACATGGCTCACAATTATAATCAGC      |
| 928 | GTAATGAGAATGCATAGCCCCACTTCGTCTGGTAAATGGGACTGTAATCTTACTTTGT[T/C]TTAGCCCACAGGATGATATGTATAGAAAAGTGAGTTATAAACTGTAATGAagctggcac       |
| 929 | AACTCTGGAGTACTGATTAACATCATTGTCTAGCAGTTGAAAGCTCTCTGATAACCTGG[A/G]GAGTGCTAGATAAGAATAGATAACAATTTTGCCTTTTGATTTTCTTTGCCAAACAAGTGG     |
| 930 | GGAAATTTCAATTCATGTTGCTCATTGACTACGCTGAACCTGGCTTTCCAGGTACCTGGG[A/C]ATTAGAATCCTCATCCGAAAAGCTGTTTTTGTTTTTTCCAAGTGACTGAATCGTAACAA     |
| 931 | GTTCTCCTGGGGTCTCTGGTGTCCCTGATTCTGGAAATGCTTTCTGTCTCTTCTCTA[A/C]CCCATTTCACTTAGATAAGTCCATTTATCCTTGAGATTTCTCATAGGTGGCAGTCTTTT        |
| 932 | GAAATCAGTGGTGAGAAGAATGGCTATAAGGAATGGGCTCTACAATTACTGTCACTCTCA[C/G]CAAAAAGAGAACGCAAGGAATGCATATTTTCATCTCATGGCGACCTGAGGATCGTCTCAAT   |
| 933 | GCCTCACACTTCATCAGAGGCCATTTTCATCTTTATTACACAGCCACACACAAGGCAGCAT[T/C]TTCTCCTTTCACTGATGGATTATTTCAAGATTTATAAGGTCTGGTCTACATGAAAGCAAA   |
| 934 | TTATTGAAAAGCAGCTATTGTTTTAAGTCTTTGCATATACATTTCTATGATTTACTATA[T/C]ATCAGTAGCATTCTCCAACCCATCTGGCTAGGCAAGCACCCTGAATATGAAGGAGGC        |
| 935 | AGTGCCAAGAGGTGAGGTGAGGTCAGGGCAGGGGCTCTTGACATGGCACATACTATCTGCCCA[T/C]AGCTATTTTGACTGGACAGTCATTGTGCTGGGTGGTAAAAATCCAGTGGGCTGGGTAG   |
| 936 | AATTAAGCATGAGTCCCCTACTGAGATAACAGTCTTTCTGGACAGAGTTATGCCAGGT[T/C]TTTTCTATGTAAGCAGTCATCTATTAGGCTGTCGTTGGTCTGTCAAGATGAACTGTG         |
| 937 | AATAGGAATAAAATATCGAGGGCTTAAATTAGTGAATCTCTCAAGATCTTGAATTTGAC[A/G]TTTTTATAATTTTACTTAATCATAGCTCTGGGATTGGAATTACTCTTTAGCTGGCC         |
| 938 | GATACAAGCAAATTAATTAAGGAATAAGTCAAAGAATATTGGGAAATGTTAATCCACT[T/C]GGTGTGGAAAAGGACTTTTTTGTGTTGTTTTGAGACGGAGTCTTGCTCTGTGCC            |
| 939 | TTAAAATAAATACTCATAATGGCTCTCCAATGTCTGTAAGGCATTTCACTTAACAATA[C/G]CTGGCAAATATTATGTCAGTGGAAAATACAGCCAAGTTTTGGCTCATCCAAATGTTGTC       |
| 940 | AAAAAGCTGTTTTAGTTGGCTCCAAGAATGTCTCTGGGAATTATAATGTATTCATAGAAA[T/C]GAGTGTGGAGTGCCCACTTGACAATGGAAGATCCACAATAATACACCTGGATCTGATAG     |
| 941 | AAAAGATAAAAAAATAGAACCACCACAAATATAAATATTTATTTCCATATCTCACAAT[T/G]TTTTCTAGGCCATTGCTGGTGACAGACTTTCCAGTCTTTTCAGAACTTACTCATCACA        |
| 942 | GGAAAGCAGGACCTATTTGTTAAAACAAAAAGAAATAGCTCTGTATTCAGAGTAGTTTT[T/C]TCAATGGTACTTTGCCCGTAAACATTAAACTCACTAACACTTAAATAAATAGATTTG        |
| 943 | CAAAGAAGTTATCACATGTTTATGTATAAGTTTAAATGCATTGAATGTCAAAAATGCAGA[T/C]AGCGCTTTGATCAAGGACATTTTAGCAATGTATTCAGACAGGATCTTTATTTCTAGGGT     |
| 944 | TGCAGAGCAAATTCAGGAAAAAAGTAATTATGCTTCTTCGCATTTTATCATTTATAA[A/C]CTCACCTTTAGAGAAGGTATTGAGAGATTATACTGATTAGTCCAGATTTTATTTTACA         |
| 945 | CTGTTCTATTTAGGTTTCTATCTCAAAGTATTTAGTGTACCAGATGCAAGTACAG[T/C]TAGGAATTTAATGGATAGAAATATAAAATAAATGGATACAAGGTTATATAATCTCTGCC          |
| 946 | CTCAAGAGCAGCGGCAGGGATTCTAAAGGTGAGCGAAGCAGATGAAATCTAGTCCAGTGT[C]CAGGAATCAGCTCTGCCCAACAAGTTCTACAACTTTTGGCTTAACAGTTCTATTTTT         |
| 947 | TTTGGGAATAGCAGTGTGATGCTCCTGGAGCACCTCTGGAGGCCAGAAAAGGTGACA[T/C]GGGGCATAGGAAGAATGAAGAGAATTCTGATCATCTGCTCTTATGTAGAGGCCGAAT          |
| 948 | ATGCCTTTATGCAGGAACTCTGAAAACAAGCAAGAGATCTTTGTGGGCTCTCTGTAAT[T/G]ATGTGCATGCAAAAAGCATCCTCAGTGTGTCCTTGACAGCTGCTCTGAGACCCTG           |
| 949 | ATATTTTTCAGTTGTTATTTATTTCTTTTAGCAGAGTAAAGCCTAGTTGTTTATAATTT[C/G]TGTGTGGTAAATTTGAGTTGTTGTTGTTCTACTCTCTATGCCTTGGTCTCTGTGCT         |
| 950 | GTTATAGTCTTCATAAATTTTTATAGCCAGTAACATAAAAACAATAAAGACAGTGTCC[A/G]AATTAAGATACAGCAATGACATGACATCTACATTTGAAACTAGTAATAATGGATGCCGG       |
| 951 | CCAAAGGGCTGGGATTACAGGCGTGAGCACGGCGCCAGCCTGAGCTCTCTATATTTA[A/G]TTTTCTTAAATAACATGATCAGTTCACCCATGAATTTAATTAATTCCTTATGATTTG          |
| 952 | GTTTACAAAGTACTTTTCATACATGATCTCATTGTTTACAGCACGAAAAAAGCTGTACACAAG[A/T]TGGTGCAATCCAAGTAAGGTCTCCAGTGTAGCTAATAGTAGGGTAAGGAAAACGATATGT |
| 953 | TCACACCGAAGGACTAGTTTGAACCTGCAGCCGATTCTGGCTTTTTCATCTCTTTCAAT[T/C]GGGGAGGCAAGGCTAAAAGAAGAAAAGAGAATGAAAAACAATCTGATCACCAGGCAATC      |
| 954 | AAGCAAACATCCAGATATTTTATTTCATTTCATTACACATTTTATTCAATAATGTCTGAAGA[C/G]AAAGCATAGCCTGATGTATGCTCCACGAGACTAGCAAGAAGTTGACATTATAGCTACACT  |
| 955 | CCCAATTGGTAAATTTTCTACTTTTCTATATCCAAATGCCATCAGCCACTAGGGTTAG[A/G]AAGAGAAAAATGTATAAAATCATTTCTACAAGTCTGTTAAGGACACTTACTGAAGGTTA       |
| 956 | AAAACAAAAAAACCTGGGTTTCATATCTCCTTTTGTCTGTTAAATATCTCTGTGATCCTGA[A/G]TAAGTCTGTTTCTATGCTGTCTTTTATTCTTTTTAATAACAATGAAGGGTTGGATAAG     |
| 957 | AGTAATTATTAATAAATAAATAGATCATAAAAGTCTTCTGCAATGAAACTCATTGTTAG[A/T]TCTATCTGGATTAGTGACTAAATATAAACGAAATGATTAATAAATAGGAAATCCCTT        |
| 958 | ATTTTTTTGTTGGATTATCATTTTTAAGTTGTACACATTTACAATGAAAAGAAAACCAC[T/C]TCACTTTAAATCATGGGCACAGATATTTAAGTATTTAAAATCAAAGTTTTAAAAACT        |
| 959 | AGGATGAGAATGAGTTTTAGAAATAAACTTACAAGCTATCATCTTTCTAAATGAATGAGC[T/C]GCTCAGAGATGAACTGATGGTAACTAAAGAAATCAATAATAAATGATCAGGATGAACAT     |
| 960 | AACTGATGTATATATTAATTTGACACAATGTCTGACCTGTTTCTGTTTTTTCACAGTCAG[C/G]CTTCTCTCCATTTTCTAAGGTGACTCGGACCTTACCCTCTAAAAATCAAATCATGCC       |
| 961 | TGGCTGGGGATACTGATTTTACTCAGACCAGCCTGCAGCTCTAGAGTGTGGGTAGAGAGC[A/G]GGGAGTGGGGGTTGGGAGAGGGGGAGGAAAGAGAGAGAGGAGAGGACGGGCTTGGATG      |
| 962 | TACCAAATACTGAACACTTGCCAGCAATGTCTTTAACTGACAGCAATCCACCTCTGC[T/C]ACCAACAGGCTGAGTAGCCAGGGGTGATTACCCATATGGCACTATCTAATCAAACCATTG       |
| 963 | CAAAGGTAAGGATGACTTCAGTTTTAGTCTCAGCACTGCTACTGATTGGTTGTAGTGACA[T/C]TGGGCAAGTCACTTCACTTTTCCAGACCTGCCTTTTCTACTTAGGAAGTGACACAAATA     |
| 964 | AGGAAGTTTGGGGTCTGCTGCAGGCGTGTCTTCAATATCACAAGAGAGTTTATGAGATA[T/C]GTGCTTTGTAATAATTTGGTCTATGGTGTCTCAAGAAATGAAAATAAAGTAATTTGTG       |
| 965 | TACACATATATGATTGTCCATGTCAATGTCAACAGATGGCATTGTCAGAGAGGGCAGC[A/G]TTTTTATTCAAACCATCCATGTCGCTCTATTTCTGACTGACAGGTAGATTGATGATTATC      |
| 966 | GAAACTGTCTGCAATAAACATGTATAATGATTTTGTATATGACATGAAACAGACGG[T/C]GACCCATTTATTAAGGTCCATTACACAGATATAGGAGGGACTTTAAGGCATCACAAAT          |
| 967 | ACAAAATACTTGCCAGGAAGTAAATGTTGACTATTTCCAAATCTCAGTGCAAAATGAGAT[A/G]GATAACGTTAATGCACATGGAGTAATACATTTTAAAGTACCTATTCAAGTGGAGACCT      |

Complete list of all 94 genes and 1,536 SNPs present on the COGS SNP Chip

|      | A        | B         | C             | D                                                       | E         | F     | G          | H             | I      | J                   |
|------|----------|-----------|---------------|---------------------------------------------------------|-----------|-------|------------|---------------|--------|---------------------|
| 1    | Cytoband | Gene Name | Gene Alias    | Description                                             | Size (kb) | Chrom | SNP ID     | Position (bp) | htSNP* | Coding              |
| 968  | 8p12     | NRG1      | GGF, HRG, NDF | neuregulin 1                                            | 1,124.6   | 8     | rs4445183  | 32681985      | T      |                     |
| 969  | 8p12     | NRG1      | GGF, HRG, NDF | neuregulin 1                                            | 1,124.6   | 8     | rs10095556 | 32686855      | T      |                     |
| 970  | 8p12     | NRG1      | GGF, HRG, NDF | neuregulin 1                                            | 1,124.6   | 8     | rs2976525  | 32692525      | T      |                     |
| 971  | 8p12     | NRG1      | GGF, HRG, NDF | neuregulin 1                                            | 1,124.6   | 8     | rs7844475  | 32711671      | T      |                     |
| 972  | 8p12     | NRG1      | GGF, HRG, NDF | neuregulin 1                                            | 1,124.6   | 8     | rs2976532  | 32713793      | T      |                     |
| 973  | 8p12     | NRG1      | GGF, HRG, NDF | neuregulin 1                                            | 1,124.6   | 8     | rs7007436  | 32721934      | T      |                     |
| 974  | 8p12     | NRG1      | GGF, HRG, NDF | neuregulin 1                                            | 1,124.6   | 8     | rs4512342  | 32727416      | T      |                     |
| 975  | 8p12     | NRG1      | GGF, HRG, NDF | neuregulin 1                                            | 1,124.6   | 8     | rs10503929 | 32733525      | T      | Met(289/286/294)Thr |
| 976  | 8p12     | NRG1      | GGF, HRG, NDF | neuregulin 1                                            | 1,124.6   | 8     | rs7005288  | 32740009      | T      |                     |
| 977  | 8p12     | NRG1      | GGF, HRG, NDF | neuregulin 1                                            | 1,124.6   | 8     | rs3735782  | 32744399      | T      |                     |
| 978  | 8p12     | NRG1      | GGF, HRG, NDF | neuregulin 1                                            | 1,124.6   | 8     | rs7812718  | 32746598      | T      |                     |
| 979  | 8p11.21  | CHRN3     |               | cholinergic receptor, nicotinic, beta 3                 | 40.8      | 8     | rs1530847  | 42667396      | T      |                     |
| 980  | 8p11.21  | CHRN3     |               | cholinergic receptor, nicotinic, beta 3                 | 40.8      | 8     | rs7844824  | 42672170      | T      |                     |
| 981  | 8p11.21  | CHRN3     |               | cholinergic receptor, nicotinic, beta 3                 | 40.8      | 8     | rs7012713  | 42711460      | T      |                     |
| 982  | 9q31.1   | GRIN3A    | NMDAR-L       | glutamate receptor, ionotropic, N-methyl-D-aspartate 3A | 169.2     | 9     | rs3824473  | 103374598     | T      |                     |
| 983  | 9q31.1   | GRIN3A    | NMDAR-L       | glutamate receptor, ionotropic, N-methyl-D-aspartate 3A | 169.2     | 9     | rs1407877  | 103395276     | T      |                     |
| 984  | 9q31.1   | GRIN3A    | NMDAR-L       | glutamate receptor, ionotropic, N-methyl-D-aspartate 3A | 169.2     | 9     | rs3739724  | 103396260     | T      |                     |
| 985  | 9q31.1   | GRIN3A    | NMDAR-L       | glutamate receptor, ionotropic, N-methyl-D-aspartate 3A | 169.2     | 9     | rs6479056  | 103399082     | T      |                     |
| 986  | 9q31.1   | GRIN3A    | NMDAR-L       | glutamate receptor, ionotropic, N-methyl-D-aspartate 3A | 169.2     | 9     | rs1323432  | 103402758     | T      |                     |
| 987  | 9q31.1   | GRIN3A    | NMDAR-L       | glutamate receptor, ionotropic, N-methyl-D-aspartate 3A | 169.2     | 9     | rs942141   | 103411557     | T      |                     |
| 988  | 9q31.1   | GRIN3A    | NMDAR-L       | glutamate receptor, ionotropic, N-methyl-D-aspartate 3A | 169.2     | 9     | rs10125230 | 103417353     | T      |                     |
| 989  | 9q31.1   | GRIN3A    | NMDAR-L       | glutamate receptor, ionotropic, N-methyl-D-aspartate 3A | 169.2     | 9     | rs12685902 | 103420991     | T      |                     |
| 990  | 9q31.1   | GRIN3A    | NMDAR-L       | glutamate receptor, ionotropic, N-methyl-D-aspartate 3A | 169.2     | 9     | rs2181561  | 103427933     | T      |                     |
| 991  | 9q31.1   | GRIN3A    | NMDAR-L       | glutamate receptor, ionotropic, N-methyl-D-aspartate 3A | 169.2     | 9     | rs2031202  | 103432195     | T      |                     |
| 992  | 9q31.1   | GRIN3A    | NMDAR-L       | glutamate receptor, ionotropic, N-methyl-D-aspartate 3A | 169.2     | 9     | rs10512284 | 103433635     | T      |                     |
| 993  | 9q31.1   | GRIN3A    | NMDAR-L       | glutamate receptor, ionotropic, N-methyl-D-aspartate 3A | 169.2     | 9     | rs4742820  | 103434406     | T      |                     |
| 994  | 9q31.1   | GRIN3A    | NMDAR-L       | glutamate receptor, ionotropic, N-methyl-D-aspartate 3A | 169.2     | 9     | rs4743478  | 103440270     | T      |                     |
| 995  | 9q31.1   | GRIN3A    | NMDAR-L       | glutamate receptor, ionotropic, N-methyl-D-aspartate 3A | 169.2     | 9     | rs2417282  | 103448043     | T      |                     |
| 996  | 9q31.1   | GRIN3A    | NMDAR-L       | glutamate receptor, ionotropic, N-methyl-D-aspartate 3A | 169.2     | 9     | rs1323413  | 103466545     | T      |                     |
| 997  | 9q31.1   | GRIN3A    | NMDAR-L       | glutamate receptor, ionotropic, N-methyl-D-aspartate 3A | 169.2     | 9     | rs766551   | 103467877     | T      |                     |
| 998  | 9q31.1   | GRIN3A    | NMDAR-L       | glutamate receptor, ionotropic, N-methyl-D-aspartate 3A | 169.2     | 9     | rs1337679  | 103495146     | T      |                     |
| 999  | 9q31.1   | GRIN3A    | NMDAR-L       | glutamate receptor, ionotropic, N-methyl-D-aspartate 3A | 169.2     | 9     | rs2152868  | 103496167     | T      |                     |
| 1000 | 9q31.1   | GRIN3A    | NMDAR-L       | glutamate receptor, ionotropic, N-methyl-D-aspartate 3A | 169.2     | 9     | rs1337697  | 103518748     | T      |                     |
| 1001 | 9q31.1   | GRIN3A    | NMDAR-L       | glutamate receptor, ionotropic, N-methyl-D-aspartate 3A | 169.2     | 9     | rs4743484  | 103519301     | T      |                     |
| 1002 | 9q34.2   | DBH       |               | dopamine beta-hydroxylase                               | 23.0      | 9     | rs1076153  | 135487964     | T      |                     |
| 1003 | 9q34.2   | DBH       |               | dopamine beta-hydroxylase                               | 23.0      | 9     | rs1076150  | 135488582     | T      |                     |
| 1004 | 9q34.2   | DBH       |               | dopamine beta-hydroxylase                               | 23.0      | 9     | rs1611115  | 135490336     | T      |                     |
| 1005 | 9q34.2   | DBH       |               | dopamine beta-hydroxylase                               | 23.0      | 9     | rs2797849  | 135491762     | T      |                     |
| 1006 | 9q34.2   | DBH       |               | dopamine beta-hydroxylase                               | 23.0      | 9     | rs3025388  | 135493077     | T      |                     |
| 1007 | 9q34.2   | DBH       |               | dopamine beta-hydroxylase                               | 23.0      | 9     | rs2007153  | 135493640     | T      |                     |
| 1008 | 9q34.2   | DBH       |               | dopamine beta-hydroxylase                               | 23.0      | 9     | rs1108581  | 135495062     | T      |                     |
| 1009 | 9q34.2   | DBH       |               | dopamine beta-hydroxylase                               | 23.0      | 9     | rs3025399  | 135498795     | T      |                     |

Key appears on page 109.

|      | K      | L      | M                       | N       | O       | P       | Q       |
|------|--------|--------|-------------------------|---------|---------|---------|---------|
| 1    | Prom** | TFBS** | Association (reference) | MAF_CEU | MAF_YRI | MAF_JPT | MAF_HCB |
| 968  |        |        |                         | 0.39    | 0.17    | 0.11    | 0.07    |
| 969  |        |        |                         | 0.23    | 0.48    | 0.00    | 0.00    |
| 970  |        |        |                         | 0.08    | 0.43    | 0.30    | 0.31    |
| 971  |        |        |                         | 0.01    | 0.09    | 0.00    | 0.00    |
| 972  |        |        |                         | 0.48    | 0.05    | 0.00    | 0.00    |
| 973  |        |        |                         | 0.24    | 0.36    | 0.38    | 0.37    |
| 974  |        |        |                         | 0.13    | 0.08    | 0.39    | 0.36    |
| 975  |        |        |                         | 0.23    | 0.00    | 0.00    | 0.00    |
| 976  |        |        |                         | 0.19    | 0.07    | 0.48    | 0.43    |
| 977  |        |        |                         | 0.47    | 0.24    | 0.49    | 0.43    |
| 978  |        |        |                         | 0.08    | 0.25    | 0.00    | 0.00    |
| 979  |        |        |                         | 0.15    | 0.46    | 0.14    | 0.20    |
| 980  |        |        |                         | 0.02    | 0.00    | 0.00    | 0.00    |
| 981  |        |        |                         | 0.08    | 0.00    | 0.00    | 0.00    |
| 982  |        |        |                         | 0.18    | 0.28    | 0.22    | 0.30    |
| 983  |        |        |                         | 0.12    | 0.18    | 0.36    | 0.20    |
| 984  |        |        |                         | 0.11    | 0.17    | 0.25    | 0.28    |
| 985  |        |        |                         | 0.27    | 0.09    | 0.07    | 0.13    |
| 986  |        |        |                         | 0.08    | 0.03    | 0.00    | 0.00    |
| 987  |        |        |                         | 0.38    | 0.38    | 0.41    | 0.49    |
| 988  |        |        |                         | 0.19    | 0.09    | 0.06    | 0.11    |
| 989  |        |        |                         | 0.44    | 0.42    | 0.44    | 0.47    |
| 990  |        |        |                         | 0.07    | 0.00    | 0.09    | 0.20    |
| 991  |        |        |                         | 0.18    | 0.40    | 0.41    | 0.47    |
| 992  |        |        |                         | 0.23    | 0.04    | 0.09    | 0.01    |
| 993  |        |        |                         | 0.41    | 0.50    | 0.31    | 0.48    |
| 994  |        |        |                         | 0.09    | 0.07    | 0.13    | 0.31    |
| 995  |        |        |                         | 0.03    | 0.21    | 0.14    | 0.26    |
| 996  |        |        |                         | 0.09    | 0.28    | 0.15    | 0.01    |
| 997  |        |        |                         |         |         |         |         |
| 998  |        |        |                         | 0.08    | 0.27    | 0.15    | 0.01    |
| 999  |        |        |                         | 0.17    | 0.08    | 0.48    | 0.40    |
| 1000 |        |        |                         | 0.48    | 0.44    | 0.34    | 0.40    |
| 1001 |        |        |                         | 0.22    | 0.00    | 0.08    | 0.02    |
| 1002 |        |        |                         | 0.18    | 0.26    | 0.32    | 0.40    |
| 1003 |        |        |                         | 0.48    | 0.49    | 0.07    | 0.12    |
| 1004 |        |        |                         | 0.18    | 0.13    | 0.16    | 0.22    |
| 1005 |        |        |                         | 0.41    | 0.35    | 0.00    | 0.00    |
| 1006 |        |        |                         | 0.11    | 0.43    | 0.15    | 0.17    |
| 1007 |        |        |                         | 0.29    | 0.49    | 0.31    | 0.39    |
| 1008 |        |        |                         | 0.14    | 0.48    | 0.16    | 0.17    |
| 1009 |        |        |                         | 0.05    | 0.00    | 0.08    | 0.11    |

Key appears on page 109.

|      | R                                                                                                                               |
|------|---------------------------------------------------------------------------------------------------------------------------------|
| 1    | Sequence                                                                                                                        |
| 968  | AAGTCTCATCAATGAAATTAGTAATCTGTGGGGACAAACATGCCATTAGTGCCTGTCATT[T/C]GAGATTTGTGATCATTGACGTGCTTTTTATGGCATCTGAAAAATTAGTTGACTTTAAA     |
| 969  | TATATTTTTGTCTCAAGAGGTTCTGAGAACATGTGTGCCTGTATTTCAAATTTAAATG[A/G]GTGAAGATAAGGCTTGGCATAGTCAATTGAATAAAATTTAGTAAAAATCAACGGAATAC      |
| 970  | AGTATAAGCTAGGCATGAAAGGCATGAGGAAATGATGGGAGCCTCCAGACGAAAAAGT[A/C]TCCCAGTGGTACTGATTTCTATTAGAGACAATGCCATCCCTGTGATTGAAGTCCAAC        |
| 971  | CATTTAACAGATATAGACAGCATTGTGAGAGCAAGTGGTGGGACTCATGTGGATCTAGA[T/C]AGTGCCTCTTCAGACGACTGTGTCCTTATTTCTTCATGTCCTCATATATCTAGAATC       |
| 972  | GAATGACTAGAGAGAGGAAATATCAGCTGTATTTTTTTTTCTTCTCTTGTTCCT[A/G]ATCAAGGGAGGGTTTGTGAAAAATGAAGCTGAGAAGAGAAAGGATGCTAAGGATGGTTT          |
| 973  | AACTTCTTTTTAGACCATTTGCTTTTTTCAGAAGATATCATTAAAAATAACCACTATGT[T/G]TTTGTGAAGTTCAGAGTGTGATTCCTTAAATAACTTCTTTAGTATGCTTTCAATGCCACT    |
| 974  | TCACACTGTCAAAGTAAAAGAAAAATATAGATATACAAAATTTGGACACACTTTTTTG[T/G]AAGGCCTTCATCCTACATAGTTGGGATTGAAGACCAGTCTCTGGGGAGTAAGGAGCTGTG     |
| 975  | AACAGCGGAAAAAGCTGCATGACCGTCTTCGGCAGAGCCTTCGGTCTGAACGAAACAATA[T/C]GATGAACATTGCCAATGGGCCTCACCATCTAACCCACCCCCGAGAATGTCAGCTGGT      |
| 976  | GAGCATTATCAGACATAACATGATAGAAGGTAAACAGGGTACAGCCAACCTTGAGGCATC[A/G]TGAAAGAGATTGACCAAAGACTGATATAGCTGTGGGTTTTGGAAGAGAGATAGACCAAAG   |
| 977  | AAGTTTATCCAGGGTAACTTGCTCACTAACTATTCCTTTTTATGGCCTGGGGTTAAAGGG[A/C]GCATGGCTCACACTGGTAAAAATAAGGAAGGCCTGGTCTTATCTTGTATTAATAACTG     |
| 978  | TGTCCTAACGATGAATGATAAAAGGACTTGATGTTCAAAATTTGGGGTTATAAGGCAGGT[C/G]TGAATCTGGAGACTCAAGATGCTGGAAGGAGTGGAAAGTTTCGATGACTTTATATGAAT    |
| 979  | TGGATTAAGTGTATCCTGCCAGTGGTGGATGTAATAAGATTTAAACCAAAAACAATTA[T/C]CTCTAGAGTGAATTTTAGGCATCAAGAGATGAGAGGTTATTTAGGAGGGCAGTGAGAAT      |
| 980  | ATGTTTTGTCAATTTGCTGCGTTTCTCCTTCTGAATCACTATGAGCTTGGTAAAGAAAATA[T/C]AAAAGCAGGAAAAACATTATTGAATGACTGAGCATTACTCAGAGAATTGTTCAAATATT   |
| 981  | TGCTTGTAGCAATGGGCCAGGCAAATCTCAACAAGGGTTGGGGATTACACTGGCAGGA[T/C]AGCTGGCACTGCACACTTAAACAATAACACAGATTCCAAGTTGCCTGGCCTACCGAAGCAG    |
| 982  | GACTGTTAGTAAGAGCATGCTTACACCCTACTGTGAAAAGGGGAGGGGATGTGGTAAGC[A/G]GAAACAGAAGACAGGCAGCAGAGGCATTAATAATGCATACCATGCTTTCAGAACAAAAGC    |
| 983  | CAGAATGCATGTGTCTTCCACGCATTTATGTCATGTTGGTAGCTTTAGATCAGCCAT[A/G]GTGAGAAAAGAACAAAAGCTTTTAGTTGTTTTGTTTTGTTTTGGAGAATTTGTTTACCA       |
| 984  | TTTTTGAACTTTTAAAGTTCTAGTTTGGTCTTTGAATCAAACAAAAGTAAAAGATGTTT[A/T/C]AAAAGCCATTTCTTTTTCTTTCCCACTATGCTCATTGACTTGCTTCCCCCTATAGG      |
| 985  | GAGAGCTTCAAGATGGCCACAGCAGAACATTAACCAAGTACGGGACCTTATGAGACTGC[A/G]TGGGCCACATGCCCATGAAGCTGGCCCTGCAAGGAGTTGGGCCATTGACCTCTCTGTGC     |
| 986  | cagtcacactggcattcttcagttcctcctactgtttgttctcctgcctagggcc[T/C]cttgacatggagttctctacctggaacactcattcctcccagaA                        |
| 987  | ACATTTCTGGATTTGAATCCTGTCTCTACTATTAACAGCTGAATTACTTAACTGCTCTTA[A/C]GTCTGAGTCTCCTCATCTATGAATGGGTATGATAAAACCTGCCATCCCATTTTGTCTAA    |
| 988  | ATAGTAAAAAAAACCCAAACCTTTTTTTTTTGCCTTCAACATGATTGAGGAAGAG[A/T]GATTAATAATAGTTCAATTTTTCATGGATAAAGACTAAAAGATTGTCAAGCATCCAAAG         |
| 989  | CTCATTTTTAAATTGCTGACTCAACTGAGCAGCCTGAGTTGCTTTTATTACTAGAAA[T/C]GTGGCTTTGCAATAAAGACAGGGTTGACTATTTTGTGGTTGATGAATGAAGCAAAATGGA      |
| 990  | TTTTTATTGTCATATTGCTACCACAAATATTGTGGAATATTGGCAAGTGAATCTGT[T/G]GCTACGTAGCTGTCAAGGTACATTATGGTACTGTGGCAGTCAACTTTGATTGGAGAAC         |
| 991  | AGACAAAAGACTTTACATAGAAAAATTTGACCTAGTCTTGAATAAATAGATGTTGG[A/G]CAGACAATGCTGATAAATGTGCCTTGGCAAGCCATACGACTGCAATTTGCTACTATGAG        |
| 992  | TTTTATGGTCTATGACCAGGATTTTAGGGAAATCCTGCTTTTTCTGGGTCTCATTTTCTT[T/C]TCTGAATGCACCAGCACATCGTTCCCTTTCCAAAGCATGGAAGGAATCAGGGAACCCAGCAG |
| 993  | CTAGACCTGTAAACCCCTCCATTATACCTACAGTTTACATAGCACTGACAACACTTGG[A/G]ATTATTTTTATAATTTGCCTTCCCTGCTAGATTGTAAGTTTCCATGAGGATGGTCCCAT      |
| 994  | CTGTGAAATAGCACTGCAGTACTATTTCTGAGCCTCTGGATGTACCCTGGTATTTTTT[C/T]GTCTCATTTATTGTAATGAAAGTGTAGAGCCTATCATCATGGTCTCCAACCTGAAGTATCT    |
| 995  | TACATATTCAGATCATTGCCCATTTAAAAATTAGATTATTTGCTTTTTGTTTTGGCTACA[T/G]AATTGTTTGAATCCTTTTATAACCTGGTTATTAATCCCCTGTTGAATGAATAGTTTGCA    |
| 996  | TTAACTCTTTTTGCTAGAATAATTTATTTTACAATAAAAGTAATATATGTTGCTTCTCAC[A/G]GCCCTTACCAACTCATCTGGGAAGCAAGCTC                                |
| 997  | TCCATAGGCACTAAATTCTCCCTGATTAAAAATTAATGCTATCAAAGTGAATTTGAAAA[A/G]TGAAAAGGGAAATTTGAAAAATACTCAAAAAATTAATCACATAAACCTATTACTTTCAA     |
| 998  | GCTGTGCCACCTTGGGAAAATTACTCACTTTTTCTGAACCTTGATTTGTCTTCTATTAA[A/C]GGGGGATGATCATTGCAGTCACTCATGAGGCCATTGTGAGGATGAAATAAATAATATG      |
| 999  | ATTAAGAATATATAACAGAGCAGTACAATAATGAATGTTTTCAGAAGGCAGGATTATC[A/C]CTGCATGGTGCAGTTGACATAAATTTGCTGGCAATGCTAGGTATGGTCTATTTTATTGCA     |
| 1000 | CGCCTCACTGCCTGGCTGAGTAATGGAAGATGGCATAGGATAGGCCTGTAATCATAACAA[C/G]TACAGTTCTTTAAGGTACAGCTAGAAAAGAGCTAGAATAAGTATATAATGTAAGGACAG    |
| 1001 | tgtaaaaAGAAAACAGATATATGAGGTCATAGCATATAATATAGTGAATTCAGTGAGG[T/C]TAAAATCTATACTTTAAAAACTACCAAATGTGATTTTTTTTTCCAGGTGGTTCCTGGT       |
| 1002 | GGGAGTGGCCTGGCCTGTTCACTCACCCAGCTCCAGTCTGCACCACCGTGCCTCCACTTG[T/G]GGTTGCTACTGCCTGAGGTTAGGACGTCAGCAGAAGCCAGCCTCATGTGGCAGAGGGCAT   |
| 1003 | GCACACCTTGTGAGCAAGGTGAGAAAAATCCACTGGAGTCAAGAGGAAGGGACGCTCA[A/G]ATGAAAAATGCAACCCGAGAGAAAAATCTGCGGAGACTGGGGCCGGGCGGAGGGAGCGAA     |
| 1004 | GGGGTGGAGCTGGAGGGATCAAGCAGAAATGCTTGAAGGCAGCTGCCCTCAGTCTACTTG[T/C]GGGAGAGGACAGGAGGGAGAGGTGCCGTGGTGAAGTACTGACCCCTGGGCCACGGGTGGAT  |
| 1005 | CCCCATCTGGCCGTCTTCTGCACTCACCCCTCTTAAACCCAGAAAGTTCTTCTGTCACCT[C/G]TCAGTGTGTTGAGTTGACTCTGCTCTGAGCCAAGTCTGCACCCCGAGCTTGGGCATCATGG  |
| 1006 | CCTGCATTTCCCGGCTGCTAGGGAAGCCAGAGGAAGCCAGGTGACTTTGCCTTCCGTGC[A/G]CTGGCAAGGTTAATTTGCACAACAAATTCCTACGAAAGCAAATGTCAGCCTTATTATTC     |
| 1007 | ATTGAAGGCTCAAACAGATGGTCAGAGTTGTTTACACCTGTCCTGCCCTCAAACATTCAC[A/G]CGTGTGTGAGAATCATATTCCTAACATTCGACCCACACCAAGCCCATATCCCTAGCTAC    |
| 1008 | ATGTCATAGTACCTTCTGTCCTGATAAGTCTGGGGCCTGGGCCTGGCCAGCTATGAC[A/G]GAGAGAAAGCCAAGGAGGATGGCCAGAGGCAGTGGTGGGGCCAAAGCACTTAGGATGGTC      |
| 1009 | CACAGAAACGCAAGTGCSCAGGACCTTATGCCCTCAGTGGTCTGATTCTGTTTCCA[A/C]CTGGAGTCAGGGTTTTGTGTACAGGTGGTCCCAGGGCT                             |



|      | A        | B         | C          | D                                                      | E         | F     | G          | H             | I      | J         |
|------|----------|-----------|------------|--------------------------------------------------------|-----------|-------|------------|---------------|--------|-----------|
| 1    | Cytoband | Gene Name | Gene Alias | Description                                            | Size (kb) | Chrom | SNP ID     | Position (bp) | htSNP* | Coding    |
| 1010 | 9q34.2   | DBH       |            | dopamine beta-hydroxylase                              | 23.0      | 9     | rs1541333  | 135501206     | T      |           |
| 1011 | 9q34.2   | DBH       |            | dopamine beta-hydroxylase                              | 23.0      | 9     | rs2519154  | 135502096     | T      |           |
| 1012 | 9q34.2   | DBH       |            | dopamine beta-hydroxylase                              | 23.0      | 9     | rs2797853  | 135502336     | T      |           |
| 1013 | 9q34.2   | DBH       |            | dopamine beta-hydroxylase                              | 23.0      | 9     | rs77905    | 135507918     | T      |           |
| 1014 | 9q34.2   | DBH       |            | dopamine beta-hydroxylase                              | 23.0      | 9     | rs2073833  | 135510103     | T      |           |
| 1015 | 9q34.3   | GRIN1     | NMDAR1     | glutamate receptor, ionotropic, N-methyl D-aspartate 1 | 30.4      | 9     | rs11146020 | 139152905     |        |           |
| 1016 | 9q34.3   | GRIN1     | NMDAR1     | glutamate receptor, ionotropic, N-methyl D-aspartate 1 | 30.4      | 9     | rs2301364  | 139154356     | T      |           |
| 1017 | 9q34.3   | GRIN1     | NMDAR1     | glutamate receptor, ionotropic, N-methyl D-aspartate 1 | 30.4      | 9     | rs10870198 | 139162141     | T      |           |
| 1018 | 9q34.3   | GRIN1     | NMDAR1     | glutamate receptor, ionotropic, N-methyl D-aspartate 1 | 30.4      | 9     | rs12238250 | 139166503     | T      |           |
| 1019 | 10p12.1  | GAD2      |            | glutamate decarboxylase 2                              | 88.3      | 10    | rs3781117  | 26552050      | T      |           |
| 1020 | 10p12.1  | GAD2      |            | glutamate decarboxylase 2                              | 88.3      | 10    | rs2839673  | 26553557      | T      | Gly232Glu |
| 1021 | 10p12.1  | GAD2      |            | glutamate decarboxylase 2                              | 88.3      | 10    | rs8190646  | 26560513      | T      |           |
| 1022 | 10p12.1  | GAD2      |            | glutamate decarboxylase 2                              | 88.3      | 10    | rs11015008 | 26567596      | T      |           |
| 1023 | 10p12.1  | GAD2      |            | glutamate decarboxylase 2                              | 88.3      | 10    | rs4747550  | 26625608      | T      |           |
| 1024 | 10p12.1  | GAD2      |            | glutamate decarboxylase 2                              | 88.3      | 10    | rs876848   | 26636502      | T      |           |
| 1025 | 10q23.2  | GRID1     |            | glutamate receptor, ionotropic, delta 1                | 766.9     | 10    | rs2616673  | 87357346      | G      |           |
| 1026 | 10q23.2  | GRID1     |            | glutamate receptor, ionotropic, delta 1                | 766.9     | 10    | rs1876883  | 87365358      | G      |           |
| 1027 | 10q23.2  | GRID1     |            | glutamate receptor, ionotropic, delta 1                | 766.9     | 10    | rs2457450  | 87372875      | G      |           |
| 1028 | 10q23.2  | GRID1     |            | glutamate receptor, ionotropic, delta 1                | 766.9     | 10    | rs10788462 | 87408436      | G      |           |
| 1029 | 10q23.2  | GRID1     |            | glutamate receptor, ionotropic, delta 1                | 766.9     | 10    | rs7097285  | 87420101      | G      |           |
| 1030 | 10q23.2  | GRID1     |            | glutamate receptor, ionotropic, delta 1                | 766.9     | 10    | rs4547037  | 87424453      | G      |           |
| 1031 | 10q23.2  | GRID1     |            | glutamate receptor, ionotropic, delta 1                | 766.9     | 10    | rs12255557 | 87426328      | G      |           |
| 1032 | 10q23.2  | GRID1     |            | glutamate receptor, ionotropic, delta 1                | 766.9     | 10    | rs2356728  | 87484397      | G      |           |
| 1033 | 10q23.2  | GRID1     |            | glutamate receptor, ionotropic, delta 1                | 766.9     | 10    | rs2949374  | 87491059      | G      |           |
| 1034 | 10q23.2  | GRID1     |            | glutamate receptor, ionotropic, delta 1                | 766.9     | 10    | rs3011703  | 87509023      | G      |           |
| 1035 | 10q23.2  | GRID1     |            | glutamate receptor, ionotropic, delta 1                | 766.9     | 10    | rs2140661  | 87512489      | G      |           |
| 1036 | 10q23.2  | GRID1     |            | glutamate receptor, ionotropic, delta 1                | 766.9     | 10    | rs1917155  | 87529467      | G      |           |
| 1037 | 10q23.2  | GRID1     |            | glutamate receptor, ionotropic, delta 1                | 766.9     | 10    | rs2949385  | 87533376      | G      |           |
| 1038 | 10q23.2  | GRID1     |            | glutamate receptor, ionotropic, delta 1                | 766.9     | 10    | rs1106789  | 87543389      | G      |           |
| 1039 | 10q23.2  | GRID1     |            | glutamate receptor, ionotropic, delta 1                | 766.9     | 10    | rs1917146  | 87558623      | G      |           |
| 1040 | 10q23.2  | GRID1     |            | glutamate receptor, ionotropic, delta 1                | 766.9     | 10    | rs7902997  | 87564546      | G      |           |
| 1041 | 10q23.2  | GRID1     |            | glutamate receptor, ionotropic, delta 1                | 766.9     | 10    | rs1112487  | 87589036      | G      |           |
| 1042 | 10q23.2  | GRID1     |            | glutamate receptor, ionotropic, delta 1                | 766.9     | 10    | rs1880386  | 87601923      | G      |           |
| 1043 | 10q23.2  | GRID1     |            | glutamate receptor, ionotropic, delta 1                | 766.9     | 10    | rs1880385  | 87605302      | G      |           |
| 1044 | 10q23.2  | GRID1     |            | glutamate receptor, ionotropic, delta 1                | 766.9     | 10    | rs11599415 | 87607771      | G      |           |
| 1045 | 10q23.2  | GRID1     |            | glutamate receptor, ionotropic, delta 1                | 766.9     | 10    | rs7895098  | 87640358      | G      |           |
| 1046 | 10q23.2  | GRID1     |            | glutamate receptor, ionotropic, delta 1                | 766.9     | 10    | rs1917143  | 87646055      | G      |           |
| 1047 | 10q23.2  | GRID1     |            | glutamate receptor, ionotropic, delta 1                | 766.9     | 10    | rs2222546  | 87652091      | G      |           |
| 1048 | 10q23.2  | GRID1     |            | glutamate receptor, ionotropic, delta 1                | 766.9     | 10    | rs6585987  | 87655958      | G      |           |
| 1049 | 10q23.2  | GRID1     |            | glutamate receptor, ionotropic, delta 1                | 766.9     | 10    | rs2882832  | 87660812      | G      |           |
| 1050 | 10q23.2  | GRID1     |            | glutamate receptor, ionotropic, delta 1                | 766.9     | 10    | rs2352099  | 87674661      | G      |           |
| 1051 | 10q23.2  | GRID1     |            | glutamate receptor, ionotropic, delta 1                | 766.9     | 10    | rs12245750 | 87678254      | G      |           |

|      | K      | L      | M                             | N       | O       | P       | Q       |
|------|--------|--------|-------------------------------|---------|---------|---------|---------|
| 1    | Prom** | TFBS** | Association (reference)       | MAF_CEU | MAF_YRI | MAF_JPT | MAF_HCB |
| 1010 |        |        |                               | 0.46    | 0.36    | 0.07    | 0.07    |
| 1011 |        |        |                               | 0.38    | 0.25    | 0.07    | 0.07    |
| 1012 |        |        |                               | 0.43    | 0.00    | 0.00    | 0.00    |
| 1013 |        |        |                               | 0.46    | 0.38    | 0.18    | 0.07    |
| 1014 |        |        |                               | 0.34    | 0.36    | 0.46    | 0.41    |
| 1015 |        |        | p=0.000001 (Zhao et al. 2006) |         |         |         |         |
| 1016 |        |        |                               | 0.13    | 0.14    | 0.23    | 0.13    |
| 1017 |        |        |                               | 0.43    | 0.24    | 0.05    | 0.10    |
| 1018 |        |        |                               | 0.08    | 0.08    | 0.05    | 0.09    |
| 1019 |        |        |                               | 0.17    | 0.00    |         | 0.31    |
| 1020 |        |        |                               | 0.01    | 0.00    | 0.00    | 0.00    |
| 1021 |        |        |                               | 0.13    | 0.19    | 0.02    | 0.06    |
| 1022 |        |        |                               | 0.15    | 0.00    | 0.24    | 0.19    |
| 1023 |        |        |                               | 0.17    | 0.41    | 0.43    | 0.39    |
| 1024 |        |        |                               | 0.32    | 0.43    | 0.33    | 0.36    |
| 1025 |        |        |                               | 0.21    | 0.00    | 0.18    | 0.16    |
| 1026 |        |        |                               | 0.14    | 0.19    | 0.00    | 0.00    |
| 1027 |        |        |                               | 0.34    | 0.37    | 0.38    | 0.37    |
| 1028 |        |        |                               | 0.45    | 0.12    | 0.42    | 0.40    |
| 1029 |        |        |                               | 0.19    | 0.33    | 0.26    | 0.23    |
| 1030 |        |        |                               | 0.30    | 0.33    | 0.05    | 0.04    |
| 1031 |        |        |                               | 0.14    | 0.13    | 0.13    | 0.16    |
| 1032 |        |        |                               | 0.48    | 0.17    | 0.31    | 0.29    |
| 1033 |        |        |                               | 0.28    | 0.35    | 0.26    | 0.23    |
| 1034 |        |        |                               | 0.33    | 0.48    | 0.18    | 0.11    |
| 1035 |        |        |                               | 0.48    | 0.20    | 0.31    | 0.29    |
| 1036 |        |        |                               | 0.49    | 0.19    | 0.32    | 0.31    |
| 1037 |        |        |                               | 0.38    | 0.42    | 0.19    | 0.11    |
| 1038 |        |        |                               | 0.15    | 0.47    | 0.24    | 0.28    |
| 1039 |        |        |                               | 0.26    | 0.01    | 0.00    | 0.01    |
| 1040 |        |        |                               | 0.22    | 0.49    | 0.36    | 0.34    |
| 1041 |        |        |                               | 0.10    | 0.18    | 0.06    | 0.06    |
| 1042 |        | Y      |                               | 0.16    | 0.22    | 0.00    | 0.00    |
| 1043 |        |        |                               | 0.48    | 0.08    | 0.44    | 0.44    |
| 1044 |        |        |                               | 0.12    | 0.00    | 0.00    | 0.00    |
| 1045 |        |        |                               | 0.19    | 0.30    | 0.11    | 0.14    |
| 1046 |        |        |                               | 0.26    | 0.35    | 0.21    | 0.18    |
| 1047 |        |        |                               | 0.31    | 0.37    | 0.21    | 0.19    |
| 1048 |        |        |                               | 0.09    | 0.38    | 0.00    | 0.00    |
| 1049 |        |        |                               | 0.34    | 0.17    | 0.21    | 0.21    |
| 1050 |        |        |                               | 0.37    | 0.23    | 0.38    | 0.27    |
| 1051 |        |        |                               | 0.23    | 0.12    | 0.38    | 0.27    |

Key appears on page 109.

|      | R                                                                                                                               |
|------|---------------------------------------------------------------------------------------------------------------------------------|
| 1    | Sequence                                                                                                                        |
| 1010 | GGGTGGTCTGGAGGGGCTGTGCAGCAGGAGGCTCTGCCCCCTGGGTTATGTACAGGAAAG[C/G]GATGTCAGGCGGCAAGGAGTGTGAAATTGACAAGGGGTTTTAATTACAGGGAAGAGGCT    |
| 1011 | CTACTTTGATTTATGCCTGCAGACCCAAGGAACCCACCTACCAAGCTGACATCTCAGGA[A/G]CAATTTGAGTGAGAATGTGCCCCCCAGGAGGGCCAGCGTTGCAGGTCTAGCCCCGG        |
| 1012 | TAAGTGCTTTGATGTTCTTCCACGTTCAAAGGAACCTAAGCTGGAATCAGCCTGCA[A/G]GACGGTGACAACCTGCAGGGTGTGGTCTGGGCAAAGAAGAGGGCATGGAACCTCCATCTG       |
| 1013 | CCTGGGCAGGTGCAGGGGAAGCGGGGTGACTTACCACGTGGCCAGCTCCCGGCTT[C/C]GTGTTGTACGTGCAGGAGTGTGATGAGCACATCTCCCTGAGGAAAAGCCAATGTACCATC        |
| 1014 | GGGGAGCTGCCCTCCCCTTTGATCCCACCTGGTGCTGTGATGTGGCCACTGCCAAGAGGA[C/G]GACATGGGCCAGGGAAGCCACAGAAGTGCACGAGGGGACGCTGGCACCCGAGGGCCTCAAC  |
| 1015 | GGCCTGGCTGAGCACATGCGGCAGCCACGGTCAACCCTCCCTATTCTCTTAGCCCCAGGA[C/G]GGGGGTCCCAAGTTACATGGCCACGCAGATGGGGCCTCTCCCTCATTCTGAACCTTGTG    |
| 1016 | TGGAGTGTGTCAAGTGTGGGGGTGGGCATTCCGGGTAAGAGAGTAGAAGCGCCTGTCCAGC[T/C]ACATGCCCGCCCTGCAGAGCTTTAAACAGGACGGGGCCTGGGGCCATCTTTGTTTCTGCT  |
| 1017 | ACTGCTGGGGCCACACAGCAGGTGCACGGCAGGGTGGGGGCGGCAGGTGGGGCTCCCTCC[A/G]AACGGTGGACGCGGACAGGGCCTCCTTTTCTCCCGAGAGCGACCGTTTCCAAGAGCACAG   |
| 1018 | TGCTGGGATTACAGGAGTGAGCCACCGTGCCAGCCACTTGTGCCTCTTCTGTTATTTT[A/C]TGAATTGTTTACACTTCCCTTACTCATCACAGAGCTTGAGAGAAATTCTGTAGCTGTGAT     |
| 1019 | TGTTTTATCAACAAGATACAGAAAAGATATACTCAATCGACTGATTAGTCCATCGCAAGGC[T/C]TATCTAATTAACCTTAGATTCTCTAAAACCTCTCTAAATGGATTGACATCCACACTCTC   |
| 1020 | ATGAGAGAAATCATTGGCTGGCCAG[A/G]GGGCTCTGGCGATGGGATATTTCT                                                                          |
| 1021 | ATCTTTTGGGGTTTTATTTTGTAAATGTCTTCTTCAACGTATAGGGGTACATTGGGC[A/G]AAAACCACACAGCCTAAAATTACTTAGTATTTACTTTCTGTTGCTGCTGGAACAAATGAT      |
| 1022 | GTGTGACTAATAAGATAGCAGCTTACAGACGTGCCTGTGTACAGATCCACATCACCTGC[A/G]AATCACACAGTCTCTAAAAATGTGTCTGGGAGTCCCTCCCTCCAGATCATTATAATT       |
| 1023 | GGAGGGCAGCAAGTGGGCTGTGCCAATGTTACCAACAAGAATCAAAAGGGCTGGTCT[A/G]TTGATCACCTCTTGTGTTTCTGGTCTTTATCTTCTTATTTTAAATTTTTTTATTCTTGA       |
| 1024 | CTCTGCTCCAGCCTTCCCTCTCTCCAAGCCTCTCCATTTATAGACATAGATTGTTA[T/C]GCCTGTGAACCACCCGCATCCTCACAGTGTGTTTTATAGCATTACTGTTTAATTTTGGG        |
| 1025 | CTCAGGAGATGGTGGGCAGTTTTTCAAAGCATCAGGAGAAAGAGTTCTGATCAGTTCAAT[A/C]GCAGATGTTTTAGGGAGGGCAATGAGAGCGAACCCGACATGACTTCACATCGTGGGTGGT   |
| 1026 | CATGTAAGACACAGAATGTGGCTGTGCATTCAAGTACTTGTGTTAAGATACATGTGCA[T/C]TTATATGGTTTTGGGGTCAATGCTTAGATTGCCCCAGAACACTACAGACCTCTCTCATGGCA   |
| 1027 | AAATAAATGAATTTGGGGACCCAAAGAAAGCCTCAGCACTGCCTTTTACTCAGCATGGAG[T/G]TGAAAGAGAAAGGCTGAGGAAGCTCTAGGATGCCAAGGAAGTGAAGACGACATTTAGGAA   |
| 1028 | GCACAGAGTCATGGGAACATGAAGTTGAACCTGTCCCAGCTTAGCAGACAAGGAAGTGGG[A/G]CTGTGGGCAAAGAGGGGAGGGTTCATGGGAAGGGTGAAGGCTGAGGCTGAGGCTTAAGGAGA |
| 1029 | CTGAAATGGGCACCAATGCTGAGACTTGCATTAGAAACAGAGCAGTGAGGATTCTGCCTG[A/C]CCCTGAATGGGATTTCAATGGGCTTTTTAAACAAGCCCACTGTATTTCTATCTTGAATA    |
| 1030 | ACCTGTTCTTTCTGTACACAACCTTAGTACAAGAGAAGTTAAGAGTGAAAATTGCAGGTT[T/G]TTTTTTTTTTGGTGTGCAGCATAAATCCATCCATAGCAGAGTCAAATGGATTACCTGAC    |
| 1031 | CAGCTTAAGTTCTGTTGTAGGAATCCCAACTACAGGCAAGAAAGCTTCGCAGTCAAACA[T/C]ACCACAATGGAGACGCAGCTTCCAATGAGCCTGCCCTAGCCCTAGAACAGCAAAGGGAAG    |
| 1032 | CAAACACATCAAAGTTCAACTATGTTCCAGGATTCAGGATCCTTCATATTGGGTAGGAAA[C/G]TTTATTATCCCTCACATCAGACAGAAGCCAAGTGCCCCAGGCTGAGTGAATCTCCCAT     |
| 1033 | TTAGAGTGGTTGAAAGTTCCTGGGTTGGATTTGTCTTTGCATAGTTTGTGTTGGAAA[T/C]TTACTTTAAGACTTCTAGTCATGGTAAAGTATTTGAATAATAAATATATATTTTTTAA        |
| 1034 | TCACTGAGGGCCTTCCCTCCCTGCAACCCTGGTGCTCCTTCCAGGATCCCAGTAT[A/G]JATGGACCATAGACATTTACTGTTGGATTCTGGACCAGTCTTGGGCAGCTGCACCCTTAA        |
| 1035 | CACAACAGGCACCTCACTTCTTCCACGCTCCAAACTGAGTTGATCACTTGTGCATTGTTA[T/C]GACTTCAAGACAGGGGGACTTTCTTCTTCCCATGCCCTCTCTCTTCTGTTTCTC         |
| 1036 | CGAGGTTAATTACATCATCTAAAGAGGTCCTAACTGCCCTTCCAGGCATGTTCTATGAG[T/C]TTGCCCTGAATGAGCAGTCACTAATACCTCCTAATCTCACACAACAGGCACTGGCAATG     |
| 1037 | TAAACCAGAATGAAAATGACATACCTTTGTAGGAGCCAAGGATCTTGCTAAAAACACTT[C/T]TCCTTGTGTCATGAGGTGAGCTGAGGATTACCACTGGTGGGAACAGGGATCACTTTAGAA    |
| 1038 | TCTGATGGTCTCTGCAGGGCTTCAACATTTGGCATCTCTGCTACGCTCACTGATAGTAAC[A/G]TTTACAAGGTACGGCACATACAAAATACTCCACAAATGATAGCTATTACTACCATGGTAA   |
| 1039 | AATGTAATTTACACATATTAATAAACAGAAAATGACTGATAATCAAGAGATAAAATAGT[A/C]AATAGAATTAAGACCTTAAAAGGTAAAAGATATTGAGTGAACAGACCAGCATTTAAAATA    |
| 1040 | GATAACCTCATATCTATTAAGTTATTAATTTGTAGTTAAAACCTTTCAAAGGCCCT[C/C]TATAGTTTCACTGATGGATCAGGAAGAAATAATACCAATTCTGCACAATTTCTCTAGAA        |
| 1041 | tgccatgtggcaatgagaagatgtttattctgttttgggtagagaggtctgtatg[A/G]tccataagttctattgtaccagtgtgagttcaggtcttgaatcttaattctctc              |
| 1042 | TTATTTTAAAATGTATCTTTTTGTCAATTTAAAATCTGCCCTAATAACTGCATATCCT[A/G]GTTGTTATCTGTCTGCCTAGCAGCTTATCGCTGCTAAGGGGAAGTTATCTGGAAGCAGG      |
| 1043 | AGAAAGCTGGATTTGAAGTGAATTGAGTAATCTATGGATGATTTGTTAGAGTGAATTCAC[T/C]TTTAGAGGCTTCAAAGAGCATTAGGGAATCCATAGCGTTAGGAATTTAGTACAATG       |
| 1044 | CTGAAGTCTGAGATGAGCCAATAGGAGGTGCAAGGCATCACAACATCTGCCCGTCATG[T/C]CTGTCCAGCCCTCAAGGGCCATCCCAGCATGTCACATCCAGGCAGAGCTGACTGCCTCC      |
| 1045 | GTAATTTCTCACTGTGCCTCCAAAACAAAAGGAAATTGTAAGTGATAATCCATTGCTCT[A/G]TCTATGCTGGAGTTAGAACCAGAACCAGCTTCCACGGTGAGGTAATGTCTCCTGTTG       |
| 1046 | GATCTACCCAATATAATAATCAGAACCTTTACTTGGCTTGATGCGGAAATTTGACCTT[A/T]AAGGACAAAAATCAACATGTATCTTCCATTAAGTTAGAGCTGGGCTGGTTCAAAGGCAGT     |
| 1047 | GATTCATATCCTGGGTGGGACAAAGCAGTACAGCGAGAGCTTTTATCACACTATGCAGAA[C/G]AGCATGCGATTGAAAAACGTATAAATATTTATTTATGGAATTTTCCACTTAATACTTTT    |
| 1048 | AATTTAAGTCTAATGATAGAGGGTAAATAAATCAAGAGAACATAAAAACTTAAGCATT[T/C]ATGCCCTTGAAATAAAGCTTCAAATATATTAAGCAATAACTGGTAAAACCTGAAAGGAG      |
| 1049 | ATCCATTTGCAGGGATGACCCATGAGATATGAACGCAATAGTAAGAAGTAAATAAGGGTA[T/C]AAATGTGGGGTCAAGGGTATCCTGCAGAGGGCTGCAGCAGGCTGGATGAAGTGGGCAGAT   |
| 1050 | GGATGGCAGAAGCGCCGCTCACAGCCCCGGGGAAATGAAGATTCATTACAGATCATTG[T/C]GGATCCTCAGATGAAATAGAGGCAGCTTCCAGGGCTGTGCAGGGAGTGCAATTTACTAT      |
| 1051 | GAATCGGCACTGGCAGGCTTGGCCTGCAGACCAAGTCACTCCAGCTGCAGAAGTGGT[A/T]CCTGTGAAGGCTGGGAGCTGGGCCAAAAGTGGCACGACAGGAAGCTCCCTTTCCCTTGG       |

Complete list of all 94 genes and 1,536 SNPs present on the COGS SNP Chip

|      | A        | B         | C          | D                                          | E         | F     | G          | H             | I      | J      |
|------|----------|-----------|------------|--------------------------------------------|-----------|-------|------------|---------------|--------|--------|
| 1    | Cytoband | Gene Name | Gene Alias | Description                                | Size (kb) | Chrom | SNP ID     | Position (bp) | htSNP* | Coding |
| 1052 | 10q23.2  | GRID1     |            | glutamate receptor, ionotropic, delta 1    | 766.9     | 10    | rs7924131  | 87684856      | G      |        |
| 1053 | 10q23.2  | GRID1     |            | glutamate receptor, ionotropic, delta 1    | 766.9     | 10    | rs1418396  | 87690805      | G      |        |
| 1054 | 10q23.2  | GRID1     |            | glutamate receptor, ionotropic, delta 1    | 766.9     | 10    | rs7906886  | 87696511      | G      |        |
| 1055 | 10q23.2  | GRID1     |            | glutamate receptor, ionotropic, delta 1    | 766.9     | 10    | rs2153828  | 87705134      | G      |        |
| 1056 | 10q23.2  | GRID1     |            | glutamate receptor, ionotropic, delta 1    | 766.9     | 10    | rs7912559  | 87724804      | G      |        |
| 1057 | 10q23.2  | GRID1     |            | glutamate receptor, ionotropic, delta 1    | 766.9     | 10    | rs4244970  | 87732575      | G      |        |
| 1058 | 10q23.2  | GRID1     |            | glutamate receptor, ionotropic, delta 1    | 766.9     | 10    | rs4393254  | 87734378      | G      |        |
| 1059 | 10q23.2  | GRID1     |            | glutamate receptor, ionotropic, delta 1    | 766.9     | 10    | rs10509525 | 87735846      | G      |        |
| 1060 | 10q23.2  | GRID1     |            | glutamate receptor, ionotropic, delta 1    | 766.9     | 10    | rs2352464  | 87737769      | G      |        |
| 1061 | 10q23.2  | GRID1     |            | glutamate receptor, ionotropic, delta 1    | 766.9     | 10    | rs2001321  | 87745432      | G      |        |
| 1062 | 10q23.2  | GRID1     |            | glutamate receptor, ionotropic, delta 1    | 766.9     | 10    | rs7089658  | 87760259      | G      |        |
| 1063 | 10q23.2  | GRID1     |            | glutamate receptor, ionotropic, delta 1    | 766.9     | 10    | rs10788476 | 87766857      | G      |        |
| 1064 | 10q23.2  | GRID1     |            | glutamate receptor, ionotropic, delta 1    | 766.9     | 10    | rs12256782 | 87788988      | G      |        |
| 1065 | 10q23.2  | GRID1     |            | glutamate receptor, ionotropic, delta 1    | 766.9     | 10    | rs10788478 | 87797370      | G      |        |
| 1066 | 10q23.2  | GRID1     |            | glutamate receptor, ionotropic, delta 1    | 766.9     | 10    | rs4934146  | 87810686      | G      |        |
| 1067 | 10q23.2  | GRID1     |            | glutamate receptor, ionotropic, delta 1    | 766.9     | 10    | rs12266132 | 87813079      | G      |        |
| 1068 | 10q23.2  | GRID1     |            | glutamate receptor, ionotropic, delta 1    | 766.9     | 10    | rs2001697  | 87815478      | G      |        |
| 1069 | 10q23.2  | GRID1     |            | glutamate receptor, ionotropic, delta 1    | 766.9     | 10    | rs4934150  | 87855354      | G      |        |
| 1070 | 10q23.2  | GRID1     |            | glutamate receptor, ionotropic, delta 1    | 766.9     | 10    | rs4460754  | 87861881      | G      |        |
| 1071 | 10q23.2  | GRID1     |            | glutamate receptor, ionotropic, delta 1    | 766.9     | 10    | rs884700   | 87884268      | G      |        |
| 1072 | 10q23.2  | GRID1     |            | glutamate receptor, ionotropic, delta 1    | 766.9     | 10    | rs10509531 | 87887983      | G      |        |
| 1073 | 10q23.2  | GRID1     |            | glutamate receptor, ionotropic, delta 1    | 766.9     | 10    | rs12262754 | 87919062      | G      |        |
| 1074 | 10q23.2  | GRID1     |            | glutamate receptor, ionotropic, delta 1    | 766.9     | 10    | rs4934159  | 87936653      | G      |        |
| 1075 | 10q23.2  | GRID1     |            | glutamate receptor, ionotropic, delta 1    | 766.9     | 10    | rs1902667  | 87939219      | G      |        |
| 1076 | 10q23.2  | GRID1     |            | glutamate receptor, ionotropic, delta 1    | 766.9     | 10    | rs2607829  | 87941666      | G      |        |
| 1077 | 10q23.2  | GRID1     |            | glutamate receptor, ionotropic, delta 1    | 766.9     | 10    | rs2607830  | 87957082      | G      |        |
| 1078 | 10q23.2  | GRID1     |            | glutamate receptor, ionotropic, delta 1    | 766.9     | 10    | rs2607840  | 87960202      | G      |        |
| 1079 | 10q23.2  | GRID1     |            | glutamate receptor, ionotropic, delta 1    | 766.9     | 10    | rs11201945 | 87965746      | G      |        |
| 1080 | 10q23.2  | GRID1     |            | glutamate receptor, ionotropic, delta 1    | 766.9     | 10    | rs2814346  | 87994907      | G      |        |
| 1081 | 10q23.2  | GRID1     |            | glutamate receptor, ionotropic, delta 1    | 766.9     | 10    | rs2814351  | 87998880      | G      |        |
| 1082 | 10q23.2  | GRID1     |            | glutamate receptor, ionotropic, delta 1    | 766.9     | 10    | rs2814352  | 88004329      | G      |        |
| 1083 | 10q23.2  | GRID1     |            | glutamate receptor, ionotropic, delta 1    | 766.9     | 10    | rs1902664  | 88007496      | G      |        |
| 1084 | 10q23.2  | GRID1     |            | glutamate receptor, ionotropic, delta 1    | 766.9     | 10    | rs1947568  | 88008808      | G      |        |
| 1085 | 10q23.2  | GRID1     |            | glutamate receptor, ionotropic, delta 1    | 766.9     | 10    | rs2607863  | 88014423      | G      |        |
| 1086 | 10q23.2  | GRID1     |            | glutamate receptor, ionotropic, delta 1    | 766.9     | 10    | rs1870167  | 88019566      | G      |        |
| 1087 | 10q23.2  | GRID1     |            | glutamate receptor, ionotropic, delta 1    | 766.9     | 10    | rs2217224  | 88059396      | G      |        |
| 1088 | 10q23.2  | GRID1     |            | glutamate receptor, ionotropic, delta 1    | 766.9     | 10    | rs1896526  | 88059468      | G      |        |
| 1089 | 10q23.2  | GRID1     |            | glutamate receptor, ionotropic, delta 1    | 766.9     | 10    | rs7904985  | 88106459      | G      |        |
| 1090 | 10q23.2  | GRID1     |            | glutamate receptor, ionotropic, delta 1    | 766.9     | 10    | rs4933391  | 88111974      | G      |        |
| 1091 | 10q23.2  | GRID1     |            | glutamate receptor, ionotropic, delta 1    | 766.9     | 10    | rs7089364  | 88113931      | G      |        |
| 1092 | 10q23.2  | GRID1     |            | glutamate receptor, ionotropic, delta 1    | 766.9     | 10    | rs3814614  | 88118261      | G      |        |
| 1093 | 10q23.31 | HTR7      | 5-HT7      | 5-hydroxytryptamine (serotonin) receptor 7 | 117.1     | 10    | rs2420203  | 92497843      | T      |        |

Key appears on page 109.

|      | K      | L      | M                            | N       | O       | P       | Q       |
|------|--------|--------|------------------------------|---------|---------|---------|---------|
| 1    | Prom** | TFBS** | Association (reference)      | MAF_CEU | MAF_YRI | MAF_JPT | MAF_HCB |
| 1052 |        |        |                              | 0.46    | 0.31    | 0.46    | 0.34    |
| 1053 |        |        |                              | 0.15    | 0.30    | 0.38    | 0.40    |
| 1054 |        |        |                              | 0.46    | 0.30    | 0.50    | 0.43    |
| 1055 |        |        |                              | 0.08    | 0.08    | 0.25    | 0.36    |
| 1056 |        |        |                              | 0.49    | 0.20    | 0.50    | 0.40    |
| 1057 |        |        |                              | 0.49    | 0.27    | 0.34    | 0.24    |
| 1058 |        |        |                              | 0.05    | 0.01    | 0.00    | 0.00    |
| 1059 |        |        |                              | 0.45    | 0.19    | 0.34    | 0.24    |
| 1060 |        | Y      |                              | 0.27    | 0.28    | 0.15    | 0.18    |
| 1061 |        |        |                              | 0.24    | 0.30    | 0.14    | 0.12    |
| 1062 |        |        |                              | 0.25    | 0.26    |         | 0.13    |
| 1063 |        |        |                              | 0.43    | 0.13    | 0.42    | 0.43    |
| 1064 |        |        |                              | 0.18    | 0.41    | 0.11    | 0.16    |
| 1065 |        |        |                              | 0.47    | 0.13    | 0.47    | 0.37    |
| 1066 |        |        |                              | 0.14    | 0.02    | 0.00    | 0.00    |
| 1067 |        |        |                              | 0.05    | 0.10    | 0.10    | 0.13    |
| 1068 |        |        |                              | 0.24    | 0.09    | 0.11    | 0.11    |
| 1069 |        |        |                              | 0.17    | 0.39    | 0.19    | 0.23    |
| 1070 |        |        |                              | 0.08    | 0.20    | 0.00    | 0.00    |
| 1071 |        |        |                              | 0.23    | 0.37    | 0.18    | 0.22    |
| 1072 |        |        |                              | 0.31    | 0.17    | 0.31    | 0.32    |
| 1073 |        |        |                              | 0.15    | 0.40    | 0.17    | 0.12    |
| 1074 |        |        |                              | 0.16    | 0.13    | 0.07    | 0.03    |
| 1075 |        |        |                              | 0.50    | 0.02    | 0.26    | 0.34    |
| 1076 |        |        |                              | 0.24    | 0.43    | 0.49    | 0.48    |
| 1077 |        |        |                              | 0.27    | 0.23    | 0.14    | 0.10    |
| 1078 |        |        |                              | 0.23    | 0.23    | 0.11    | 0.07    |
| 1079 |        |        |                              | 0.19    | 0.22    | 0.09    | 0.06    |
| 1080 |        |        |                              | 0.16    | 0.04    | 0.49    | 0.39    |
| 1081 |        |        | p=0.010 (Fallin et al. 2005) | 0.13    | 0.38    | 0.43    | 0.44    |
| 1082 |        |        |                              | 0.18    | 0.38    | 0.43    | 0.41    |
| 1083 |        |        |                              | 0.13    | 0.37    | 0.43    | 0.41    |
| 1084 |        |        |                              | 0.33    | 0.08    | 0.41    | 0.37    |
| 1085 |        |        |                              | 0.08    | 0.00    | 0.00    | 0.00    |
| 1086 |        |        |                              | 0.17    | 0.46    | 0.46    | 0.42    |
| 1087 |        |        |                              | 0.33    | 0.07    |         | 0.35    |
| 1088 |        |        |                              | 0.07    | 0.33    | 0.00    | 0.02    |
| 1089 |        |        |                              | 0.32    | 0.08    | 0.15    | 0.20    |
| 1090 |        |        |                              | 0.36    | 0.00    | 0.30    | 0.26    |
| 1091 |        |        |                              | 0.15    | 0.27    |         | 0.43    |
| 1092 |        |        |                              | 0.45    | 0.14    | 0.35    | 0.30    |
| 1093 |        |        |                              | 0.14    | 0.36    | 0.28    | 0.31    |

Key appears on page 109.



|      | A        | B         | C            | D                                                                             | E         | F     | G          | H             | I      | J        |
|------|----------|-----------|--------------|-------------------------------------------------------------------------------|-----------|-------|------------|---------------|--------|----------|
| 1    | Cytoband | Gene Name | Gene Alias   | Description                                                                   | Size (kb) | Chrom | SNP ID     | Position (bp) | htSNP* | Coding   |
| 1094 | 10q23.31 | HTR7      | 5-HT7        | 5-hydroxytryptamine (serotonin) receptor 7                                    | 117.1     | 10    | rs7086484  | 92523709      | T      |          |
| 1095 | 10q23.31 | HTR7      | 5-HT7        | 5-hydroxytryptamine (serotonin) receptor 7                                    | 117.1     | 10    | rs12779003 | 92532245      | T      |          |
| 1096 | 10q23.31 | HTR7      | 5-HT7        | 5-hydroxytryptamine (serotonin) receptor 7                                    | 117.1     | 10    | rs12412496 | 92536145      |        |          |
| 1097 | 10q23.31 | HTR7      | 5-HT7        | 5-hydroxytryptamine (serotonin) receptor 7                                    | 117.1     | 10    | rs11596518 | 92544991      | T      |          |
| 1098 | 10q23.31 | HTR7      | 5-HT7        | 5-hydroxytryptamine (serotonin) receptor 7                                    | 117.1     | 10    | rs10785973 | 92588151      | T      |          |
| 1099 | 10q23.31 | HTR7      | 5-HT7        | 5-hydroxytryptamine (serotonin) receptor 7                                    | 117.1     | 10    | rs2226116  | 92590219      | T      |          |
| 1100 | 10q23.31 | HTR7      | 5-HT7        | 5-hydroxytryptamine (serotonin) receptor 7                                    | 117.1     | 10    | rs12259062 | 92600025      | T      |          |
| 1101 | 10q24.31 | BLOC1S2   | BLOS2        | biogenesis of lysosome-related organelles complex-1, subunit 2                | 12.7      | 10    | rs12254005 | 102028675     |        |          |
| 1102 | 10q24.31 | BLOC1S2   | BLOS2        | biogenesis of lysosome-related organelles complex-1, subunit 2                | 12.7      | 10    | rs2305386  | 102038259     |        |          |
| 1103 | 10q25.2  | ADRA2A    |              | adrenergic, alpha-2A, receptor                                                | 3.7       | 10    | rs521674   | 112825580     | T      |          |
| 1104 | 10q25.2  | ADRA2A    |              | adrenergic, alpha-2A, receptor                                                | 3.7       | 10    | rs3750625  | 112829591     | T      |          |
| 1105 | 11p15.5  | DRD4      | D4DR         | dopamine receptor D4                                                          | 3.4       | 11    | rs3758653  | 626399        | T      |          |
| 1106 | 11p15.5  | DRD4      | D4DR         | dopamine receptor D4                                                          | 3.4       | 11    | rs936465   | 633568        | T      |          |
| 1107 | 11p15.5  | TH        |              | tyrosine hydroxylase                                                          | 7.9       | 11    | rs3842748  | 2137971       | T      |          |
| 1108 | 11p15.5  | TH        |              | tyrosine hydroxylase                                                          | 7.9       | 11    | rs2070762  | 2142911       | T      |          |
| 1109 | 11p14.1  | BDNF      |              | brain-derived neurotrophic factor                                             | 66.9      | 11    | rs6265     | 27636492      |        | Val66Met |
| 1110 | 11p14.1  | BDNF      |              | brain-derived neurotrophic factor                                             | 66.9      | 11    | rs925948   | 27637280      | T      |          |
| 1111 | 11p14.1  | BDNF      |              | brain-derived neurotrophic factor                                             | 66.9      | 11    | rs2049046  | 27680351      | T      |          |
| 1112 | 11p13    | SLC1A2    | EAAT2, GLT-1 | solute carrier family 1, member 2 (glial high affinity glutamate transporter) | 168.0     | 11    | rs3818275  | 35265359      | T      |          |
| 1113 | 11p13    | SLC1A2    | EAAT2, GLT-1 | solute carrier family 1, member 2 (glial high affinity glutamate transporter) | 168.0     | 11    | rs10488816 | 35267994      | T      |          |
| 1114 | 11p13    | SLC1A2    | EAAT2, GLT-1 | solute carrier family 1, member 2 (glial high affinity glutamate transporter) | 168.0     | 11    | rs2281634  | 35270749      | T      |          |
| 1115 | 11p13    | SLC1A2    | EAAT2, GLT-1 | solute carrier family 1, member 2 (glial high affinity glutamate transporter) | 168.0     | 11    | rs2273688  | 35295319      | T      |          |
| 1116 | 11p13    | SLC1A2    | EAAT2, GLT-1 | solute carrier family 1, member 2 (glial high affinity glutamate transporter) | 168.0     | 11    | rs4083481  | 35308455      | T      |          |
| 1117 | 11p13    | SLC1A2    | EAAT2, GLT-1 | solute carrier family 1, member 2 (glial high affinity glutamate transporter) | 168.0     | 11    | rs4756213  | 35320142      | T      |          |
| 1118 | 11p13    | SLC1A2    | EAAT2, GLT-1 | solute carrier family 1, member 2 (glial high affinity glutamate transporter) | 168.0     | 11    | rs2025111  | 35332773      | T      |          |
| 1119 | 11p13    | SLC1A2    | EAAT2, GLT-1 | solute carrier family 1, member 2 (glial high affinity glutamate transporter) | 168.0     | 11    | rs1320443  | 35337365      | T      |          |
| 1120 | 11p13    | SLC1A2    | EAAT2, GLT-1 | solute carrier family 1, member 2 (glial high affinity glutamate transporter) | 168.0     | 11    | rs7931955  | 35341795      | T      |          |
| 1121 | 11p13    | SLC1A2    | EAAT2, GLT-1 | solute carrier family 1, member 2 (glial high affinity glutamate transporter) | 168.0     | 11    | rs1885345  | 35349177      | T      |          |
| 1122 | 11p13    | SLC1A2    | EAAT2, GLT-1 | solute carrier family 1, member 2 (glial high affinity glutamate transporter) | 168.0     | 11    | rs911562   | 35355929      | T      |          |
| 1123 | 11p13    | SLC1A2    | EAAT2, GLT-1 | solute carrier family 1, member 2 (glial high affinity glutamate transporter) | 168.0     | 11    | rs4593985  | 35359700      | T      |          |
| 1124 | 11p13    | SLC1A2    | EAAT2, GLT-1 | solute carrier family 1, member 2 (glial high affinity glutamate transporter) | 168.0     | 11    | rs7108848  | 35365917      | T      |          |
| 1125 | 11p13    | SLC1A2    | EAAT2, GLT-1 | solute carrier family 1, member 2 (glial high affinity glutamate transporter) | 168.0     | 11    | rs10836389 | 35372547      | T      |          |
| 1126 | 11p13    | SLC1A2    | EAAT2, GLT-1 | solute carrier family 1, member 2 (glial high affinity glutamate transporter) | 168.0     | 11    | rs2421897  | 35394439      | T      |          |
| 1127 | 11p13    | SLC1A2    | EAAT2, GLT-1 | solute carrier family 1, member 2 (glial high affinity glutamate transporter) | 168.0     | 11    | rs1923292  | 35394755      | T      |          |
| 1128 | 11p13    | SLC1A2    | EAAT2, GLT-1 | solute carrier family 1, member 2 (glial high affinity glutamate transporter) | 168.0     | 11    | rs1923293  | 35395679      | T      |          |
| 1129 | 11p13    | SLC1A2    | EAAT2, GLT-1 | solute carrier family 1, member 2 (glial high affinity glutamate transporter) | 168.0     | 11    | rs1923295  | 35399184      | T      |          |
| 1130 | 11q12.3  | CHRM1     |              | cholinergic receptor, muscarinic 1                                            | 12.9      | 11    | rs4963323  | 62431179      | T      |          |
| 1131 | 11q12.3  | CHRM1     |              | cholinergic receptor, muscarinic 1                                            | 12.9      | 11    | rs2067477  | 62434882      | T      |          |
| 1132 | 11q12.3  | CHRM1     |              | cholinergic receptor, muscarinic 1                                            | 12.9      | 11    | rs544978   | 62441806      | T      |          |
| 1133 | 11q12.3  | CHRM1     |              | cholinergic receptor, muscarinic 1                                            | 12.9      | 11    | rs2075748  | 62444845      | T      |          |
| 1134 | 11q14.3  | GRM5      | MGLUR5       | glutamate receptor, metabotropic 5                                            | 540.2     | 11    | rs308884   | 87883972      | T      |          |
| 1135 | 11q14.3  | GRM5      | MGLUR5       | glutamate receptor, metabotropic 5                                            | 540.2     | 11    | rs6483229  | 87903521      | T      |          |

Key appears on page 109.

|      | K      | L      | M                                   | N       | O       | P       | Q       |
|------|--------|--------|-------------------------------------|---------|---------|---------|---------|
| 1    | Prom** | TFBS** | Association (reference)             | MAF_CEU | MAF_YRI | MAF_JPT | MAF_HCB |
| 1094 |        |        |                                     | 0.25    | 0.48    | 0.31    | 0.22    |
| 1095 |        |        |                                     | 0.01    | 0.04    | 0.00    | 0.00    |
| 1096 |        |        | p=0.005 (Ikeda et al. 2006)         | 0.22    | 0.43    | 0.30    | 0.21    |
| 1097 |        |        |                                     | 0.20    | 0.01    | 0.23    | 0.22    |
| 1098 |        |        |                                     | 0.33    | 0.00    | 0.27    | 0.31    |
| 1099 |        |        |                                     | 0.17    | 0.00    | 0.00    | 0.00    |
| 1100 |        |        |                                     | 0.34    | 0.03    | 0.48    | 0.38    |
| 1101 |        |        |                                     | 0.50    | 0.37    | 0.24    | 0.22    |
| 1102 |        |        |                                     | 0.07    | 0.09    | 0.13    | 0.02    |
| 1103 |        |        |                                     | 0.28    | 0.19    | 0.32    | 0.31    |
| 1104 |        |        |                                     | 0.07    | 0.15    | 0.31    | 0.21    |
| 1105 |        |        |                                     | 0.21    | 0.19    | 0.16    | 0.21    |
| 1106 |        |        |                                     | 0.43    | 0.47    | 0.24    | 0.20    |
| 1107 |        |        |                                     | 0.25    | 0.21    | 0.02    | 0.08    |
| 1108 |        |        |                                     | 0.48    | 0.17    | 0.47    | 0.46    |
| 1109 |        |        | p=0.005 (Neves-Periera et al. 2005) | 0.18    | 0.00    | 0.34    | 0.37    |
| 1110 |        |        |                                     | 0.01    | 0.00    | 0.00    | 0.00    |
| 1111 |        |        |                                     | 0.41    | 0.44    | 0.46    | 0.33    |
| 1112 |        |        |                                     | 0.38    | 0.38    | 0.15    | 0.28    |
| 1113 |        |        |                                     | 0.26    | 0.30    | 0.35    | 0.19    |
| 1114 |        |        |                                     | 0.07    | 0.14    | 0.11    | 0.21    |
| 1115 |        |        |                                     | 0.28    | 0.08    | 0.02    | 0.09    |
| 1116 |        |        |                                     | 0.28    | 0.02    | 0.35    | 0.16    |
| 1117 |        |        |                                     | 0.41    | 0.43    | 0.26    | 0.37    |
| 1118 |        |        |                                     | 0.41    | 0.14    | 0.41    | 0.27    |
| 1119 |        |        |                                     | 0.13    | 0.26    | 0.21    | 0.22    |
| 1120 |        |        |                                     | 0.14    | 0.36    | 0.15    | 0.18    |
| 1121 |        |        |                                     | 0.27    | 0.07    | 0.05    | 0.06    |
| 1122 |        |        |                                     | 0.48    | 0.50    | 0.23    | 0.28    |
| 1123 |        |        |                                     | 0.24    | 0.14    | 0.40    | 0.42    |
| 1124 |        |        |                                     | 0.15    | 0.29    | 0.01    | 0.04    |
| 1125 |        |        |                                     | 0.14    | 0.26    | 0.36    | 0.39    |
| 1126 |        |        |                                     | 0.01    | 0.30    | 0.13    | 0.16    |
| 1127 |        |        |                                     | 0.44    | 0.16    | 0.47    | 0.47    |
| 1128 |        |        |                                     | 0.03    | 0.43    | 0.13    | 0.16    |
| 1129 |        |        |                                     | 0.40    |         |         |         |
| 1130 |        |        |                                     | 0.15    | 0.00    | 0.25    | 0.21    |
| 1131 |        |        |                                     | 0.10    | 0.00    | 0.06    | 0.14    |
| 1132 |        |        |                                     | 0.29    | 0.14    | 0.24    | 0.13    |
| 1133 |        |        |                                     | 0.25    | 0.04    | 0.15    | 0.24    |
| 1134 |        |        |                                     | 0.17    | 0.33    | 0.32    | 0.27    |
| 1135 |        |        |                                     | 0.37    | 0.48    | 0.32    | 0.38    |

Key appears on page 109.



| 1    | R                                                                                                                               |
|------|---------------------------------------------------------------------------------------------------------------------------------|
|      | Sequence                                                                                                                        |
| 1094 | ATGGGAGTGCAGAGGTGTTCTTTTACAGCAATTGAAAATAAGGCTATTTTTTTTCC[A/G]ATCTGCCAACTATATGACTGCTGACATTTGTGATACATTCTTTTACATCCTCTGTTCAG        |
| 1095 | GGGATGATGATGATGATGATGATGGCAATGATGAAGTAAATCTCTTCAAAACATCTTTG[A/G]JAATTCCTGACTTCCTTGAGCAATCAAACCTGCTAGAATCATGCCCATCACCTTTCTAT     |
| 1096 | CTCTATGCAGGCTACTGATTTTTTTTCCACATATGTATTTGGGAAATTTGAAGCTAAC[A/G]AGGAAGCCAGATGTGGTGCCTGAGCTAACACTTCCAGGTGATTTGTTCTAATATCTAA       |
| 1097 | TATGGTAGTTCTATTTTTAATTTTTGAGAAAACCCCACTTTTTTCCATAATAACTGT[A/G]TCAATTTACAAACCAACAACAATGCACAAGGATTCTTTTTCTCTAAATAAAAAACAAG        |
| 1098 | ATACACCTCCAAGACAGATCCGGAATTTCTCCAGTTGTCTGTCTCCACTACTCCAACC[A/C]AGTCCAAGCTACGATTACCTCTTGCCTTGACTAACGTAGAAGCCTTCCCATTGGTCTCCA     |
| 1099 | CACACAGGATTCCTTCTCTTGGTTGCGGTGGCTGCTGTAAGTGTGGGTGTTGAGGACA[A/C]TTGCATTGCATACTGCAGCTAAGTTTTCTGCATGTTTGGGGTAGGAGAATGAAGCAGCCT     |
| 1100 | CAGTTTTGAGGAAAAGAACATTTAAAGTTCTGAACTAGCCAGGGGTGGAAGTCATTGGGCT[A/G]AAATCCTAAGAAGGCTACATCCTAGAAAAGAGGCATCTGCCAGTGGCAGAGCTCTAACAGA |
| 1101 | TTAAGGCCATGAGTTCGAGACCAGCCTGGGCAACACAGCAAGGCCTTGTTCAAAAACAA[A/T]TTTTTAAAGTAGCTGGATGTGATGGTGCACACCTGTAGTCCCAGGTACTIONCAGGAGGCTG  |
| 1102 | ATGTCTTCTACTTCCCAGTGAATCCTATTCTTATCCTTTGTGCATCCCAAGATTTGTTG[T/C]TAGCACCCATGGGTTTCTCGTTTTCCCCACAGAGGTTCCCTATAAAAAGAGAAGAGGAAG    |
| 1103 | CCCCACCGCTATTCTTATCAGAGAGAACATGGAAAATATTCTACTCCCTCTTCCCTTA[A/T]TGAAGGATGCTGTGTGTACATCTGAATGGGGGTGGGATGCGGGGCGGGAGTGGAGTCTAG     |
| 1104 | CTAATTCCTTCCATTCCCAACTCTCTCTCTTTTTGAAGAAAATGCTAAGGGCAGC[A/C]CTGCCTGCCCTCCCCATCCCCGCTGAAATATACACTATTTTTGATAGCACACATGGGG          |
| 1105 | GACTACAGAAAATACCTCTCAGGTCACAGGTCACCCCTCTTTGGTGAAGAGTCCATAGAA[T/C]TCTCTGCTGCGCTTTCGAAGCACTTTCTTCTRCACGTTTGAACCTACCCCGCCTGT       |
| 1106 | CTGTGTTCTCTGCACACAGAAGGCTCCATGGCTGTGGCTGCCTGGGGCGAGAAAGTACA[C/G]ACTCAGCAACAGCTCAGCAGGCACCTGGGGTAGGGTGGCAGCGCCAGGAGAACCTGCAC     |
| 1107 | CCCCGGGGCGGGGAAGGAGGTGGGACATGTGGGCTTGGGGCCTGTAGGTCCACACCCA[C/G]TGTGGGTGACCCTCCCTTAACCTGGGTCCAGCCCGCTGGAGATGGGTGGGAGTGCAG        |
| 1108 | TGGCCTTGAGCAGGGCTGGACCTGTGAGCCAGGTACAGATGAGAAAACCGACCCCTGG[T/C]TGACAGACCCCCACACAGCAGGGACACCATCCGTGAGAAGGACCCAGCGTCTGGGGAG       |
| 1109 | GTGAATGGGCCAAAGGCAGGTTCAAGAGGCTTGACATCATTGGCTGACACTTTCGAACAC[A/G]TGATAGAAGAGCTGTTGGATGAGGACCAGAAAAGTTCCGGCCCAATGAAGAAAACAATAAGG |
| 1110 | AATAGCACAATAAAACAGCAGTTGGGGAACATAAGGAGCCTTAAATTGACTTTTTTTTT[T/C]CCTTCCCACAGAGATACTCTATTATAGCAAAGAAGAAAGATAATTCATTGAGCCATC       |
| 1111 | GGAGGGACCTTCATTTTAACTCACCCAGGTGATTTTTATGCTCCGAGGAGGTCCAGGG[A/T]CTCCAAGTTAAGTACGGTACTGCTGTCTTATTCTTATTCTAAATTTTAAAGGTCTGCACA     |
| 1112 | TTTTTTTTTGAACCCAATTAATATGGGCAATCAGATGCACTTCAATATCGAATCCAAG[A/G]TGGAAACAGTGGCCAAAAGAAAAAATCTTCAAGCTCTGAGTATATCTCCAAAACAGAAC      |
| 1113 | CAGTAAATTTTAAAGACAAATGTCAAGTGAAGAGGAGGATATTTGCAACTTGTGACACA[T/C]GAGCTAATATTCTTATACAAAAGAGAGCTTGAAAATCAATCAGGAAGGGACGAATACCT     |
| 1114 | TAAGGGAAGTGTCCAAAGTAAAAATAACATGAACTTTTCTCAGCAAAAGTCTTTTTTT[A/G]TACAGAAGAGCCAAGCGTTTTCTCAGTGTGCGGTACAGAGGAGGCCAGGTTCTGAATC       |
| 1115 | GGCCCTGTCTGCCAGGCTTCAGTGATATAATTTCCCTCTTACCTCCTTAGCCATT[C/A/G]TTCTCCTTTGGATTCTAGTAGTTCTTAAATTTTTGCAATAAATATCTTGTGAGAGTGT        |
| 1116 | ACCTATGCCCTCAGTTTTTCAAAGGCAGGGCAGAAGCCTCAGCTCTGGTAGAATCTGAC[A/G]TGTCTGGAGGTTGAAAGTGAGAAAGGCAGTCTTTGATGGCTTAGGGAGTGGGGAAGTGA     |
| 1117 | CTGATATGGAAAAATCTAAGATGTATTTAAGAAGTTGAAAATTCATATGCATGTGT[A/T/C]ATTATAATGTTTGGAAAGAAATCTGGAAAGAAAAGTTAAAAATGATAGGCAAGGATT        |
| 1118 | ATGCTGGACACATTTTTGGTTTTGTGCAAAATCACCCCAAAAACAAGAATTTATTTT[A/C]CCCAAATGCCAATAGGGCCGAGGTCGAGAAACCCTATCCCAACAGATGTCAGGGAGGCAG      |
| 1119 | CTGCAATTCATGAATTTTCATTTGTGCAATTTCTCACAGTGTGCTGAAGACTTAA[A/C]ATTAGAACCCTGAGAAAGAACATGAGGCTGAAAGTAGAGGACATATTCTTAAGACTGC          |
| 1120 | GTCAGCCAGTTGCTTTATACTGAGTTCTTCCAGCAACTCTCTGCACGGAATTTATTATTAT[C/G]TCCATCTTCTTGTAGAGGCAAGAGAGAGAAAATAACTTGCTCCAGGACACGTGGCTGAC   |
| 1121 | AGGGTGGCATCTTCTCTCTCATTTCATGGGGTGAAGTTTTGAGCTGTTTTCTTGCAGAGAC[A/G]ATGGGTGGAGTTGACTCATCTGTGTTCACTTTGGTCCAGCACCTGTAGGCCAGGTGGCTA  |
| 1122 | ATTATTCCATTGACTTTGCCTGTGCTATTTGTCAAATCCAGATAATTCAGACCCTGAACA[A/G]AAAGAAACGTTTTTGTGTTTTCTCATTTTACATACTGACATGTTCTAGCTTATCTAG      |
| 1123 | CCTTACCATAAAGATCACCCCTTCTTCTCTTTGAGTTTGTGAGTCCCACCAAGAACAGCC[T/C]GAAAAATCTTCAATAGCTGTCAATTTTTAAAAACATCAGAGGGACACTGAAGTACAAGCC   |
| 1124 | TAAGCATCAGGACCTTAAATAAGGGAACCAAAATGCCTTCTCAGCTTCCCAGTGCACC[T/C]TTCTGGAAGGAGGAGGAAGTACAAAAAAAACAAAAACAACAAATCATTCTAGACT          |
| 1125 | GTGTCCACAGATGGGGGACACACCAATTTGGCAGCCTGAGCCTGCTGGAGTGAAGGCC[A/G]CTTTTCAAAAATATGAAAGTGCAATAGCTCATTTAACTCCCCTGATGAAAAAAAATCC       |
| 1126 | ATAGGGAATACCATCTTTTCAGAAAAGATTCCAAGACTTGGCAAAGCTTTGGGGTATCAT[C/G]TGAATGATGTGTGCTGGCATGGCTGGTGCAGATTACTGGCTTTCTCTCAAATTTTG       |
| 1127 | AAATAAATGTGAACCAGAATGGTCAGTTCCCATATTATCCTATTCCCAAACATCTGG[A/G]TCAAACAAGTTGAACTGAAAATATATAAATGAAAGCATATAACTATATTGCTATTTTT        |
| 1128 | TATAAAAGCCTTTTTAACTAAACATGGTAAGACACTGATCTTGATCCATATGGGCTCCTA[T/G]TATCTATTTCTAGAGATCTGTTTAGCACAAAGGTACCACCCTCCTTGACACAGGTGTCT    |
| 1129 | AAATCTCTGCTTACCTCCTTCTTACTCTCTTCCAAAATCTGAATCCAACGTCAT[C/T]TCCATCCATGCCTTTCTCCATCTCTCCCTCCCCCTTCTCTCAATCCTGTCTGCACC             |
| 1130 | AGGGCTGTGAGGGAGCAGTGGTAAGGGAGGGGCCCTTAGGAACCTGAGCTCACAACCC[C/G]GTAAGCTGTGCTGGTGGGAAGGGGATATGGGGTTTGGATCCTTCAAACAGGAAGGTCCA      |
| 1131 | TGCTGACCTCATCATCGGTACCTTCTCCATGAACCTCTATACCACGTACCTGCTCATGGG[A/C]CACTGGGCTCTGGGCACGCTGGCTTGTGACCTCTGGCTGGCCCTGGACTATGTGGCCAGC   |
| 1132 | AGGAGGGGCTTCTCTCCAGGACTGTGGCCTCCTGATGAAGGCTTTAGAAGGCTTAAATA[A/C]TATCACTAATACTCCTTACACATAATAGCAGCAAAGAAAAATTACTCATATTAAGTAAC     |
| 1133 | GCCAGGAAGCAGCCCTTCCACCAGCATCCTGTGGGAGGTTGACCCCATCTTGATGGGG[A/G]TGCCAGTCCCAGAACCTCCTGTCTCCCTCAGGGCACCCCTGAAACCCACCACCCCGTCC      |
| 1134 | AGAAAAGGATGGCTTCTGCCAGAGTTTCTCAGATTGTGAAAAGATCTGAGAAAACAAGT[A/G]CTTCAGATTTACTTTGGGAGCAGAAGAACAGAATGCTTGTCAAAAGCATAGATCCTTGGGA   |
| 1135 | ACCAATATCTACTGAATATTGGATTACTGAAATTTCTATATTGGCTATGTGATTGAGAAT[A/G]CATAAATGAGTGCAGAATGAAGTGAAGACTAGAAGAAAATAACAAGTTTAAATAATAA     |

|      | A        | B         | C          | D                                  | E         | F     | G          | H             | I      | J      |
|------|----------|-----------|------------|------------------------------------|-----------|-------|------------|---------------|--------|--------|
| 1    | Cytoband | Gene Name | Gene Alias | Description                        | Size (kb) | Chrom | SNP ID     | Position (bp) | htSNP* | Coding |
| 1136 | 11q14.3  | GRM5      | MGLUR5     | glutamate receptor, metabotropic 5 | 540.2     | 11    | rs10501667 | 87904955      | T      |        |
| 1137 | 11q14.3  | GRM5      | MGLUR5     | glutamate receptor, metabotropic 5 | 540.2     | 11    | rs178244   | 87908693      | T      |        |
| 1138 | 11q14.3  | GRM5      | MGLUR5     | glutamate receptor, metabotropic 5 | 540.2     | 11    | rs905645   | 87910401      | T      |        |
| 1139 | 11q14.3  | GRM5      | MGLUR5     | glutamate receptor, metabotropic 5 | 540.2     | 11    | rs308892   | 87911831      | T      |        |
| 1140 | 11q14.3  | GRM5      | MGLUR5     | glutamate receptor, metabotropic 5 | 540.2     | 11    | rs2131068  | 87920854      | T      |        |
| 1141 | 11q14.3  | GRM5      | MGLUR5     | glutamate receptor, metabotropic 5 | 540.2     | 11    | rs308793   | 87923538      | T      |        |
| 1142 | 11q14.3  | GRM5      | MGLUR5     | glutamate receptor, metabotropic 5 | 540.2     | 11    | rs308787   | 87925352      | T      |        |
| 1143 | 11q14.3  | GRM5      | MGLUR5     | glutamate receptor, metabotropic 5 | 540.2     | 11    | rs719182   | 87929030      | T      |        |
| 1144 | 11q14.3  | GRM5      | MGLUR5     | glutamate receptor, metabotropic 5 | 540.2     | 11    | rs10501669 | 87933883      | T      |        |
| 1145 | 11q14.3  | GRM5      | MGLUR5     | glutamate receptor, metabotropic 5 | 540.2     | 11    | rs308873   | 87936450      | T      |        |
| 1146 | 11q14.3  | GRM5      | MGLUR5     | glutamate receptor, metabotropic 5 | 540.2     | 11    | rs10501670 | 87938932      | T      |        |
| 1147 | 11q14.3  | GRM5      | MGLUR5     | glutamate receptor, metabotropic 5 | 540.2     | 11    | rs308875   | 87942090      | T      |        |
| 1148 | 11q14.3  | GRM5      | MGLUR5     | glutamate receptor, metabotropic 5 | 540.2     | 11    | rs2133395  | 87961055      | T      |        |
| 1149 | 11q14.3  | GRM5      | MGLUR5     | glutamate receptor, metabotropic 5 | 540.2     | 11    | rs1504088  | 87965452      | T      |        |
| 1150 | 11q14.3  | GRM5      | MGLUR5     | glutamate receptor, metabotropic 5 | 540.2     | 11    | rs3816649  | 87977813      | T      |        |
| 1151 | 11q14.3  | GRM5      | MGLUR5     | glutamate receptor, metabotropic 5 | 540.2     | 11    | rs1354411  | 88016449      | T      |        |
| 1152 | 11q14.3  | GRM5      | MGLUR5     | glutamate receptor, metabotropic 5 | 540.2     | 11    | rs1499043  | 88032310      | T      |        |
| 1153 | 11q14.3  | GRM5      | MGLUR5     | glutamate receptor, metabotropic 5 | 540.2     | 11    | rs904462   | 88070572      | T      |        |
| 1154 | 11q14.3  | GRM5      | MGLUR5     | glutamate receptor, metabotropic 5 | 540.2     | 11    | rs6483387  | 88079083      | T      |        |
| 1155 | 11q14.3  | GRM5      | MGLUR5     | glutamate receptor, metabotropic 5 | 540.2     | 11    | rs3763964  | 88079420      | T      |        |
| 1156 | 11q14.3  | GRM5      | MGLUR5     | glutamate receptor, metabotropic 5 | 540.2     | 11    | rs2219746  | 88082538      | T      |        |
| 1157 | 11q14.3  | GRM5      | MGLUR5     | glutamate receptor, metabotropic 5 | 540.2     | 11    | rs1993842  | 88091682      | T      |        |
| 1158 | 11q14.3  | GRM5      | MGLUR5     | glutamate receptor, metabotropic 5 | 540.2     | 11    | rs2169662  | 88093542      | T      |        |
| 1159 | 11q14.3  | GRM5      | MGLUR5     | glutamate receptor, metabotropic 5 | 540.2     | 11    | rs1532548  | 88096475      | T      |        |
| 1160 | 11q14.3  | GRM5      | MGLUR5     | glutamate receptor, metabotropic 5 | 540.2     | 11    | rs1499177  | 88097077      | T      |        |
| 1161 | 11q14.3  | GRM5      | MGLUR5     | glutamate receptor, metabotropic 5 | 540.2     | 11    | rs904493   | 88104997      | T      |        |
| 1162 | 11q14.3  | GRM5      | MGLUR5     | glutamate receptor, metabotropic 5 | 540.2     | 11    | rs1000061  | 88115425      | T      |        |
| 1163 | 11q14.3  | GRM5      | MGLUR5     | glutamate receptor, metabotropic 5 | 540.2     | 11    | rs10501680 | 88117162      | T      |        |
| 1164 | 11q14.3  | GRM5      | MGLUR5     | glutamate receptor, metabotropic 5 | 540.2     | 11    | rs1903851  | 88120139      | T      |        |
| 1165 | 11q14.3  | GRM5      | MGLUR5     | glutamate receptor, metabotropic 5 | 540.2     | 11    | rs1903841  | 88173280      | T      |        |
| 1166 | 11q14.3  | GRM5      | MGLUR5     | glutamate receptor, metabotropic 5 | 540.2     | 11    | rs645327   | 88228434      | T      |        |
| 1167 | 11q14.3  | GRM5      | MGLUR5     | glutamate receptor, metabotropic 5 | 540.2     | 11    | rs547644   | 88277389      | T      |        |
| 1168 | 11q14.3  | GRM5      | MGLUR5     | glutamate receptor, metabotropic 5 | 540.2     | 11    | rs167569   | 88281729      | T      |        |
| 1169 | 11q14.3  | GRM5      | MGLUR5     | glutamate receptor, metabotropic 5 | 540.2     | 11    | rs1508673  | 88287173      | T      |        |
| 1170 | 11q14.3  | GRM5      | MGLUR5     | glutamate receptor, metabotropic 5 | 540.2     | 11    | rs10830200 | 88385087      | T      |        |
| 1171 | 11q14.3  | GRM5      | MGLUR5     | glutamate receptor, metabotropic 5 | 540.2     | 11    | rs7126679  | 88393493      | T      |        |
| 1172 | 11q23.1  | NCAM1     |            | neural cell adhesion molecule 1    | 316.4     | 11    | rs7944570  | 112350798     | G      |        |
| 1173 | 11q23.1  | NCAM1     |            | neural cell adhesion molecule 1    | 316.4     | 11    | rs12575544 | 112424195     | G      |        |
| 1174 | 11q23.1  | NCAM1     |            | neural cell adhesion molecule 1    | 316.4     | 11    | rs2509377  | 112431469     | G      |        |
| 1175 | 11q23.1  | NCAM1     |            | neural cell adhesion molecule 1    | 316.4     | 11    | rs7933413  | 112464115     | G      |        |
| 1176 | 11q23.1  | NCAM1     |            | neural cell adhesion molecule 1    | 316.4     | 11    | rs10502168 | 112500642     | G      |        |
| 1177 | 11q23.1  | NCAM1     |            | neural cell adhesion molecule 1    | 316.4     | 11    | rs1245119  | 112506871     | G      |        |

Key appears on page 109.

|      | K      | L      | M                       | N       | O       | P       | Q       |
|------|--------|--------|-------------------------|---------|---------|---------|---------|
| 1    | Prom** | TFBS** | Association (reference) | MAF_CEU | MAF_YRI | MAF_JPT | MAF_HCB |
| 1136 |        |        |                         | 0.29    | 0.03    | 0.43    | 0.49    |
| 1137 |        |        |                         | 0.39    | 0.20    | 0.27    | 0.32    |
| 1138 |        |        |                         | 0.13    | 0.00    | 0.00    | 0.00    |
| 1139 |        |        |                         | 0.38    | 0.07    | 0.24    | 0.22    |
| 1140 |        |        |                         | 0.01    | 0.00    | 0.00    | 0.02    |
| 1141 |        |        |                         | 0.43    | 0.40    | 0.50    | 0.46    |
| 1142 |        |        |                         | 0.18    | 0.38    | 0.07    | 0.08    |
| 1143 |        |        |                         | 0.17    | 0.00    | 0.00    | 0.00    |
| 1144 |        |        |                         | 0.02    | 0.23    | 0.00    | 0.00    |
| 1145 |        |        |                         | 0.20    | 0.00    | 0.00    | 0.00    |
| 1146 |        |        |                         | 0.28    | 0.19    | 0.07    | 0.14    |
| 1147 |        |        |                         | 0.48    | 0.05    | 0.46    | 0.50    |
| 1148 |        |        |                         | 0.35    | 0.06    | 0.41    | 0.50    |
| 1149 |        |        |                         | 0.30    | 0.39    | 0.28    | 0.41    |
| 1150 |        |        |                         | 0.09    | 0.31    | 0.16    | 0.11    |
| 1151 |        |        |                         | 0.05    | 0.49    | 0.34    | 0.30    |
| 1152 |        |        |                         | 0.02    | 0.03    | 0.18    | 0.20    |
| 1153 |        |        |                         | 0.08    | 0.20    | 0.47    | 0.43    |
| 1154 |        |        |                         | 0.06    | 0.43    | 0.38    | 0.32    |
| 1155 |        |        |                         | 0.02    | 0.05    | 0.17    | 0.15    |
| 1156 |        | Y      |                         | 0.31    | 0.35    | 0.13    | 0.14    |
| 1157 |        |        |                         | 0.05    | 0.46    | 0.25    | 0.21    |
| 1158 |        |        |                         | 0.01    | 0.02    | 0.16    | 0.10    |
| 1159 |        |        |                         | 0.06    | 0.00    | 0.00    | 0.00    |
| 1160 |        |        |                         | 0.38    | 0.23    | 0.50    | 0.46    |
| 1161 |        |        |                         | 0.25    | 0.29    | 0.47    | 0.38    |
| 1162 |        |        |                         | 0.40    | 0.36    | 0.44    | 0.41    |
| 1163 |        | Y      |                         | 0.12    | 0.20    |         | 0.02    |
| 1164 |        |        |                         | 0.17    | 0.28    | 0.19    | 0.21    |
| 1165 |        |        |                         | 0.37    | 0.24    |         | 0.48    |
| 1166 |        |        |                         | 0.32    | 0.08    | 0.01    | 0.00    |
| 1167 |        |        |                         | 0.04    | 0.08    | 0.01    | 0.00    |
| 1168 |        |        |                         | 0.03    | 0.08    | 0.01    | 0.00    |
| 1169 |        |        |                         | 0.03    | 0.24    | 0.32    | 0.27    |
| 1170 |        |        |                         | 0.40    | 0.41    | 0.38    | 0.47    |
| 1171 |        |        |                         | 0.36    | 0.13    | 0.48    | 0.33    |
| 1172 |        |        |                         | 0.15    | 0.11    | 0.36    | 0.40    |
| 1173 |        |        |                         | 0.21    | 0.28    | 0.28    | 0.41    |
| 1174 |        |        |                         | 0.48    | 0.29    | 0.09    | 0.20    |
| 1175 |        |        |                         | 0.22    | 0.23    | 0.48    | 0.41    |
| 1176 |        |        |                         | 0.11    | 0.00    | 0.19    | 0.10    |
| 1177 |        |        |                         | 0.42    | 0.38    | 0.43    | 0.46    |

Key appears on page 109.

| 1    | R                                                                                                                               |
|------|---------------------------------------------------------------------------------------------------------------------------------|
|      | Sequence                                                                                                                        |
| 1136 | TGTGAAAGCGAGTTGGAAAATGTTGCATATTTACATATGTCTTATGTGTAAATTTTAGT[A/G]ACTCAATATGGAATGGACACTAATGAGGCAGGAGGGTAAGTCTGGGGAGTAAGTGGGTAG    |
| 1137 | ACTAACAAACTTTAGTGTTACTTAGATGTTTGTGTTCTTTAAATAATGCTCCTTTCT[A/G]TATGTACCATTTATATAAAATAAGTGTGAGAGTTAATAAGTTAGATTTGTAAGGAGCAAA      |
| 1138 | TTGATCAGAGGAAAATCTAGATGAAGGCAGAAAGGGAAGTCAATTATGGATCTTTAGGTTA[A/G]AGGGAAACAGTGAAGCCAAATTTAAAAAGATCAATATTATGCAGTACTATTGCAAGGTAA  |
| 1139 | GAGGAATCAGTCTTCTATCCAAAAGGGTAGAAAGGGCTCAAGTAAAAGCATAGGCAGTG[T/G]CTCAAGCCAAGGATTATGGGGAAAAAAAATGATAAGGTTTGAAAAATAGTACAGTTAC      |
| 1140 | ATCCTTTTCTCTAGCCCTTTGGCTAAAATAAGTTTTCTACCTTTTTCTCAATCACCTGGAC[A/T]CACATTTTTGGTCTCACCTTCTATGTCCCAACTCCTTCCCTTCCCACCTCCCACAAGGC   |
| 1141 | GAAAGACATTTGGGAAATTATCATCATTACAACCTGATTTTCAGTTAGGAATCTTCTATT[T/G]AAGCCTCTTGATAAACTGAATAAATGACTGTCCATTTCCCTGTTTTCTTTTTTATCCCC    |
| 1142 | TCTTTGGGCAACTCCAGTGAGAAAGCCTTTCTGCCCAAGATGCACCTCAGCTTGTGTAGCA[A/G]TAATCAAAGACTACCCTGTGGGTTTGCACAGAGAGCTCAATGTAAAGCAGCAGAGACAAA  |
| 1143 | CTTTTCACTAATCCTGGGGTCATCTCATGACCCACCTAATAGACAGTCTGGTGACAAAT[T/C]TGAGTAGGTTACATGACTTTACTCTTTAGAATGCTACTGACATGGAAATATTTGACTTCA    |
| 1144 | GCCTTGGAAAGATGAGTAGGATCTGGAGAGATAGAAGGAAAAGGTGGAGGACTCTAAAGAA[A/C]GAGAAATAGCATGAACATCACTTCATGCAGACTAATAATGCCTGAAGGAAATATAAGCCA  |
| 1145 | AATTTTAATATGCTATTGAGCCCATCTCTGGGATGTCATGTGGGCTTAAATAGGTAAT[A/C]AAGTCTCTGGATGTAGGTCTTTGGTGGAGAAGCATCTACCATGCTCGACCCAGCCCTGTT     |
| 1146 | ATTTGAAATCTACATATCTCCATTTATTTATCTAGATTTTAGAAACTGTAAATTTT[C/A]GAAGAGTTAGCAGGGCTGATGTCTTGACCAGCTCTTTGATTACACATTACACTTCTTAA        |
| 1147 | AATGTGCAACCAAAGTTGAGAACCATTGTTCTAGGAGGATCATTCTGTGAGTTAGACTT[T/G]AAAGAAAATGGACTTGAGATAGCTTCACTGAGTAAGTAGGAAAGGAGGCAAGTAATCTGG    |
| 1148 | TAAAGAAGTGTAGACAAAAGCATTGTTTGCAAAATCTAGGGAGATAATGGAGTACACTT[A/G]ATTTGTTATTCTGTGTGAGCTATGATCTAAGTTATTGGCTCTTCCAACCTTAAAAATTT     |
| 1149 | TTTGTGAATTTGAGGTGTTTATTAATAAATTCATGCCCTTTTCCAAGAAGAATCCAA[T/C]ATTACAATCTCTTTTTGAATCAATAGTGATAACTTAATATGTTTCCCTCTGATAATTTAG      |
| 1150 | TCTCTAATTACAGGTAACCCATTATTCAGTACCCAGGAATGTCGCGAGAGTAGATTTGTA[T/C]CTCAAAGCTATGCTTAAATTTGTTCCCAACAGGTTCTCTGACTCTGAAAACACATCATGT   |
| 1151 | CCTTTTCTCAGACTAGATTACTGTTCTCTCCAAATACAATCTTGAAAATGTTAATGTGGT[A/G]CAAGGATGAGGAATCTCAAATCTGGGTGTTAGCTGTAGCAGTTATTTAATTTAATTTTAT   |
| 1152 | ATGGTGAAGGTATAAATCTTTACAGATGTATAATTACCATTTTTCTCTCATATTTTTGA[A/G]TGCCAACAGCTATTGCACAGCAAACAAAACATACATACAATAATACAACAGAGTAGGTT     |
| 1153 | AGGTTTTATAACTTTTATTAATTTCTAAAGGATGAACAATTCAAAAATCAGGGATCATA[A/G]CACTGACAAAAGCTCTAAAGTAATAGATTTCTCTTTGTATGCAAGTGAACCTCTTTAAATA   |
| 1154 | GATCTTCGAGTACTGATCAATATCTGTGATCTTTGAAGGTCCAGTTGTGTTACCATTCCC[A/G]GAAGCAGTCCCTAAGCCCTCACCTTCTCACTCAAGATTTAGGGCTTCTTCTCTACTAT     |
| 1155 | ATCATCTAACCCAGGAAATTTTGAAGGTGCTATTAATAATTTTCTGTGATGATAGGTA[T/C]GAACCTGGATGGATGGTCACCTTATTTTTAAACTGCTTTCTAAGGTGATTTTTCTAATG      |
| 1156 | GGCTGTTTGCCTGGACTCACCTAAGTCAACAGAGGGCTGATTTCCATCACCATTTCCGG[A/G]CAAGCTTGTGCTTCTGGCATCATCTCCATGTGCCCTGGGGGCAAATTTAGCTGAGTTTTG    |
| 1157 | GCTTAACTCATAGTATATATTGGCTAACAACTGAACATGCACGTGGAATCCTTTCTAAA[T/G]AAGTCACAGATTCTGTAAAAGACTTCACTGAGAAATGACTTTTGATTAAATGTTTGT       |
| 1158 | ATTTTAGAAAAAGTTAAAAATAATTTGGAGAGCGTCTTCTGTCTAATCTCCATTAATAA[T/C]TGTATGTGCCCTGTGCAAAAAGCCATTTATATGGACAGACTCACACAGGTTTGCAGGAAA    |
| 1159 | GAGTACACAAAGGTTGACACTGCTGTTTAAAACCTCAATGATAAGGGGAAGGAATTTCC[A/G]CAGTGAAAAGTTGTTATCTAGTTGCTTGAGTGTTCAGAGGTTTCCCACATCTTTGTAGA     |
| 1160 | AAGGTCAGTGCAGAGGAGACTGAAGAAAGAATGATTTTAAACAGGTGAAGATTGGGTGA[A/G]GAAAGAAGATACCTTTCCACTATCAGGGATGGTATGTGCTTAGGCTCAGTGGCAGATTAG    |
| 1161 | CACACTGTACATGTCTCTATCATAGCACTTAGCAAACCTAAAACCTAAAACCAATTTGTTAAA[T/C]GTAGTCTCCTGTTGACTGAAAATCCCTGAATGCAAGATTACTTTATTAATTTCTACAC  |
| 1162 | AGCAACTGGGAGTCTCATATCCTCTCTTGGTGAAGTCTCCAGGATTTTATTTGTTCCCTTTCT[A/G]TGAAGAGCCTATGAGGAGAGGGAGAAATCATGTTACACAGAGAAAGTCTTCAAAGTACG |
| 1163 | AGCAATACATTACAAACAGACAGGGAGACATTAACAGCTAGACATTCTGTGCAGCAAACC[A/T]TTATTTATGACAAGGTCACCTTTGCTTTAAGTAGATATTCAGCAGTCATTGCATAATAGG   |
| 1164 | ACCATGTCAATGTGAATACAGCATAACAAGCTGGGTAACACATTCTTAGACTTAAGCAT[T/C]GGAGATAAACAGATTATGACTGAAACTGACCTAAGACTTGGAGTAGATATAGAACGAAGA    |
| 1165 | TCTACAGTACTTAAAAAAAACCTTCTAGATTACTTGCAAAAACAATCAAAAATTTTTG[T/C]TTATCTATTTCCAGTAGTAAATTTTGTGTTCTGAAGGACAAGAATCATATTGTGTTTAC      |
| 1166 | CTGATTAACTCATGATTTATTTGATGCTGAAAACCTGGTTAAAAATAAACAACGATG[T/C]TGAATTTTTCTTAGGAAACATAGCTCACTTTAAATAATGTGTTTTATCATGGGATTTCT       |
| 1167 | TTGAATACCACACTTATGGTTCAGAGACTCCTGGGATTCCACCGAAAAAGAAAAGGGAGT[A/G]TACAAGCTAAAGCTATTTCCAGTGTTTAAAAGAAACTAAGGGATACAATATATTAATTGC   |
| 1168 | TGATTAGGGTTTCTGACCATCAGAGTACTAATATAAGGCAACTAAGAATGCTAGAATAAC[A/G]GGTTTCTTGCAGTATGGAGAGAAGGGACCACCATATGCATATAGGTAACCTCACACTTT    |
| 1169 | TCTTTGATCTCTCACAAGAACTCACTAAACTCCATTAGGATAGAGAATCTGATGTGATT[T/G]GTCACTACTATATCTCCAGTCTTGGGAGAGAGAATGCTTGATGTGTAGGAATTTTCT       |
| 1170 | CAAAGTAAGAGTAGACTTTTTGTTGCCATGGAGATTTTCGAAATGAAGGTAATAATGATATC[T/C]GCATATAACTTGCAATAAAGATCTGTAGGGGTAGCAGGAATTCCTCATGCCAATGAA    |
| 1171 | TGGTCTACATGTCTAGACACAGAACCGGAGGAACCATCGATTCCAGCTTCATGCCATATC[T/C]GGTTTTGATGAATTAATGATCCATTATCCCTGTGAGACCATTACATATTATTCTA        |
| 1172 | ACAGTTTGTGTGTGTGTGTGTGTGTATGTATGTGTGTGTGTTGAATTAGTGGTAT[C/G]JAGAGGCTCTATTGACTTTAATTTTGGAGCAGACTCAGAACCCTGATGACCTATCTCCT         |
| 1173 | AAATAGACTATTTGGATTGGCATTGCTATCTGTTCCAAGAATGTTGTTTTGACAGAAAAC[A/G]TTGAAAACCTTTTAAAAAATGTTAAAAAATGGGTATTTAGGTGGTTAGCAAGTATTTT     |
| 1174 | AGGCTACCTAGCTAAAATAGCAAGGAGTGGGTTGAGAACAGCAGGAATATGTTAAGGGAA[A/G]AAGGAATATGTTTCTGTGCAAAATATTACCATACAATCTTAATCTTTTATCTTCTGGAT    |
| 1175 | TCTTGAGTTTATTTGATTTTGAAGTTGCTTCATCAGAAATGAATAAATAGACTTAAAGAG[A/G]GAAATACCACAAGCTTTAAACATAAACTAAGTAGATTGACATCTTGTCTCTAATTCA      |
| 1176 | TGGAAGGGCTTTCTTGGATTATACTTATCAAAGATACCAGAGCAATAAGGTATAATA[A/C]GTCAAGGAAAAAAGAATCCCATTTTTCTGTGTGTGTTTATTGGGCTCTCACTACAGCA        |
| 1177 | AATAGAAAAGAAAAGGCTCTAGTAGTTTTCTCATAGTCCAACAGTGTGCAAGGAGA[C/G]AGTTACTATGAACAATTCGACGAAGGACTGCAACAATACCACCTTCTACCTTAGGAAGA        |

|      | A        | B         | C          | D                                         | E         | F     | G          | H             | I      | J      |
|------|----------|-----------|------------|-------------------------------------------|-----------|-------|------------|---------------|--------|--------|
| 1    | Cytoband | Gene Name | Gene Alias | Description                               | Size (kb) | Chrom | SNP ID     | Position (bp) | htSNP* | Coding |
| 1178 | 11q23.1  | NCAM1     |            | neural cell adhesion molecule 1           | 316.4     | 11    | rs4937993  | 112509872     | G      |        |
| 1179 | 11q23.1  | NCAM1     |            | neural cell adhesion molecule 1           | 316.4     | 11    | rs1261878  | 112513530     | G      |        |
| 1180 | 11q23.1  | NCAM1     |            | neural cell adhesion molecule 1           | 316.4     | 11    | rs10502169 | 112523618     | G      |        |
| 1181 | 11q23.1  | NCAM1     |            | neural cell adhesion molecule 1           | 316.4     | 11    | rs10502170 | 112545328     | G      |        |
| 1182 | 11q23.1  | NCAM1     |            | neural cell adhesion molecule 1           | 316.4     | 11    | rs2043602  | 112548936     | G      |        |
| 1183 | 11q23.1  | NCAM1     |            | neural cell adhesion molecule 1           | 316.4     | 11    | rs2196456  | 112561921     | G      |        |
| 1184 | 11q23.1  | NCAM1     |            | neural cell adhesion molecule 1           | 316.4     | 11    | rs1943620  | 112570503     | G      |        |
| 1185 | 11q23.1  | NCAM1     |            | neural cell adhesion molecule 1           | 316.4     | 11    | rs1836796  | 112578570     | G      |        |
| 1186 | 11q23.1  | NCAM1     |            | neural cell adhesion molecule 1           | 316.4     | 11    | rs1821693  | 112582751     | G      |        |
| 1187 | 11q23.1  | NCAM1     |            | neural cell adhesion molecule 1           | 316.4     | 11    | rs2850303  | 112596440     | G      |        |
| 1188 | 11q23.1  | NCAM1     |            | neural cell adhesion molecule 1           | 316.4     | 11    | rs646558   | 112611117     |        |        |
| 1189 | 11q23.1  | NCAM1     |            | neural cell adhesion molecule 1           | 316.4     | 11    | rs2303377  | 112616711     |        |        |
| 1190 | 11q23.1  | NCAM1     |            | neural cell adhesion molecule 1           | 316.4     | 11    | rs620291   | 112619068     | G      |        |
| 1191 | 11q23.1  | NCAM1     |            | neural cell adhesion molecule 1           | 316.4     | 11    | rs605843   | 112630444     | G      |        |
| 1192 | 11q23.1  | NCAM1     |            | neural cell adhesion molecule 1           | 316.4     | 11    | rs7951404  | 112634337     | G      |        |
| 1193 | 11q23.1  | NCAM1     |            | neural cell adhesion molecule 1           | 316.4     | 11    | rs618114   | 112650283     | G      |        |
| 1194 | 11q23.1  | NCAM1     |            | neural cell adhesion molecule 1           | 316.4     | 11    | rs668204   | 112654852     | G      |        |
| 1195 | 11q23.2  | DRD2      | D2R        | dopamine receptor D2                      | 65.6      | 11    | rs6279     | 112786283     | T      |        |
| 1196 | 11q23.2  | DRD2      | D2R        | dopamine receptor D2                      | 65.6      | 11    | rs1076563  | 112801119     | T      |        |
| 1197 | 11q23.2  | DRD2      | D2R        | dopamine receptor D2                      | 65.6      | 11    | rs7125415  | 112815891     | T      |        |
| 1198 | 11q23.2  | DRD2      | D2R        | dopamine receptor D2                      | 65.6      | 11    | rs4648318  | 112818599     | T      |        |
| 1199 | 11q23.2  | DRD2      | D2R        | dopamine receptor D2                      | 65.6      | 11    | rs4274224  | 112824662     | T      |        |
| 1200 | 11q23.2  | DRD2      | D2R        | dopamine receptor D2                      | 65.6      | 11    | rs7131056  | 112834984     | T      |        |
| 1201 | 11q23.2  | DRD2      | D2R        | dopamine receptor D2                      | 65.6      | 11    | rs4350392  | 112840927     | T      |        |
| 1202 | 11q23.2  | DRD2      | D2R        | dopamine receptor D2                      | 65.6      | 11    | rs1799978  | 112851561     | T      |        |
| 1203 | 11q23.2  | DRD2      | D2R        | dopamine receptor D2                      | 65.6      | 11    | rs12364283 | 112852165     | T      |        |
| 1204 | 11q23.3  | GRIK4     | KA1        | glutamate receptor, ionotropic, kainate 4 | 325.9     | 11    | rs6589829  | 120036183     | T      |        |
| 1205 | 11q23.3  | GRIK4     | KA1        | glutamate receptor, ionotropic, kainate 4 | 325.9     | 11    | rs7928347  | 120041103     | T      |        |
| 1206 | 11q23.3  | GRIK4     | KA1        | glutamate receptor, ionotropic, kainate 4 | 325.9     | 11    | rs10502240 | 120053122     | T      |        |
| 1207 | 11q23.3  | GRIK4     | KA1        | glutamate receptor, ionotropic, kainate 4 | 325.9     | 11    | rs4445646  | 120061551     | T      |        |
| 1208 | 11q23.3  | GRIK4     | KA1        | glutamate receptor, ionotropic, kainate 4 | 325.9     | 11    | rs7126415  | 120071745     | T      |        |
| 1209 | 11q23.3  | GRIK4     | KA1        | glutamate receptor, ionotropic, kainate 4 | 325.9     | 11    | rs11217976 | 120077744     | T      |        |
| 1210 | 11q23.3  | GRIK4     | KA1        | glutamate receptor, ionotropic, kainate 4 | 325.9     | 11    | rs3133855  | 120090061     | T      |        |
| 1211 | 11q23.3  | GRIK4     | KA1        | glutamate receptor, ionotropic, kainate 4 | 325.9     | 11    | rs1939664  | 120090510     | T      |        |
| 1212 | 11q23.3  | GRIK4     | KA1        | glutamate receptor, ionotropic, kainate 4 | 325.9     | 11    | rs949298   | 120113295     | T      |        |
| 1213 | 11q23.3  | GRIK4     | KA1        | glutamate receptor, ionotropic, kainate 4 | 325.9     | 11    | rs1945010  | 120122714     | T      |        |
| 1214 | 11q23.3  | GRIK4     | KA1        | glutamate receptor, ionotropic, kainate 4 | 325.9     | 11    | rs2156762  | 120129549     | T      |        |
| 1215 | 11q23.3  | GRIK4     | KA1        | glutamate receptor, ionotropic, kainate 4 | 325.9     | 11    | rs3133864  | 120133222     | T      |        |
| 1216 | 11q23.3  | GRIK4     | KA1        | glutamate receptor, ionotropic, kainate 4 | 325.9     | 11    | rs10502242 | 120146214     | T      |        |
| 1217 | 11q23.3  | GRIK4     | KA1        | glutamate receptor, ionotropic, kainate 4 | 325.9     | 11    | rs7948804  | 120148017     | T      |        |
| 1218 | 11q23.3  | GRIK4     | KA1        | glutamate receptor, ionotropic, kainate 4 | 325.9     | 11    | rs948028   | 120149657     | T      |        |
| 1219 | 11q23.3  | GRIK4     | KA1        | glutamate receptor, ionotropic, kainate 4 | 325.9     | 11    | rs2852217  | 120152436     | T      |        |

|      | K      | L      | M                               | N       | O       | P       | Q       |
|------|--------|--------|---------------------------------|---------|---------|---------|---------|
| 1    | Prom** | TFBS** | Association (reference)         | MAF_CEU | MAF_YRI | MAF_JPT | MAF_HCB |
| 1178 |        |        |                                 | 0.46    | 0.19    | 0.21    | 0.23    |
| 1179 |        |        |                                 | 0.30    | 0.01    | 0.14    | 0.17    |
| 1180 |        |        |                                 | 0.12    | 0.12    | 0.30    | 0.23    |
| 1181 |        |        |                                 | 0.13    | 0.31    |         | 0.38    |
| 1182 |        |        |                                 | 0.40    | 0.47    | 0.44    | 0.48    |
| 1183 |        |        |                                 | 0.28    | 0.01    | 0.15    | 0.18    |
| 1184 |        |        | p=0.037 (Sullivan et al. 2007)  | 0.33    | 0.25    | 0.47    | 0.40    |
| 1185 |        |        | p=0.007 (Sullivan et al. 2007)  | 0.45    | 0.01    | 0.26    | 0.34    |
| 1186 |        |        | p=0.036 (Sullivan et al. 2007)  | 0.42    | 0.27    | 0.27    | 0.34    |
| 1187 |        |        |                                 | 0.49    | 0.07    | 0.28    | 0.36    |
| 1188 |        |        | haplotype (Atz et al. 2007)     | 0.22    | 0.42    | 0.23    | 0.24    |
| 1189 |        |        | haplotype (Atz et al. 2007)     | 0.33    | 0.22    | 0.41    | 0.41    |
| 1190 |        | Y      |                                 | 0.18    | 0.18    | 0.15    | 0.16    |
| 1191 |        |        |                                 | 0.24    | 0.48    | 0.33    | 0.29    |
| 1192 |        |        |                                 | 0.08    | 0.08    | 0.00    | 0.00    |
| 1193 |        |        |                                 | 0.39    | 0.16    | 0.10    | 0.16    |
| 1194 |        |        |                                 | 0.08    | 0.03    | 0.06    | 0.09    |
| 1195 |        |        |                                 | 0.30    | 0.34    | 0.47    | 0.47    |
| 1196 |        |        |                                 | 0.34    | 0.14    | 0.06    | 0.06    |
| 1197 |        |        |                                 | 0.07    | 0.15    |         | 0.35    |
| 1198 |        |        |                                 | 0.18    | 0.50    | 0.46    | 0.47    |
| 1199 |        |        |                                 | 0.46    | 0.18    | 0.34    | 0.27    |
| 1200 |        |        |                                 | 0.45    | 0.26    | 0.47    | 0.47    |
| 1201 |        |        |                                 | 0.12    | 0.08    | 0.35    | 0.38    |
| 1202 |        |        |                                 | 0.03    | 0.13    | 0.11    | 0.14    |
| 1203 |        |        |                                 | 0.08    | 0.01    | 0.00    | 0.01    |
| 1204 |        |        |                                 | 0.36    | 0.18    | 0.27    | 0.27    |
| 1205 |        |        |                                 | 0.27    | 0.23    | 0.42    | 0.21    |
| 1206 |        |        |                                 | 0.17    | 0.26    | 0.06    | 0.01    |
| 1207 |        |        |                                 | 0.33    | 0.14    | 0.44    | 0.42    |
| 1208 |        |        |                                 | 0.46    | 0.23    | 0.44    | 0.43    |
| 1209 |        |        |                                 | 0.02    | 0.00    | 0.00    | 0.00    |
| 1210 |        |        |                                 | 0.35    | 0.41    | 0.46    | 0.43    |
| 1211 |        |        |                                 | 0.46    | 0.24    | 0.38    | 0.34    |
| 1212 |        |        |                                 | 0.23    | 0.22    | 0.44    | 0.49    |
| 1213 |        |        |                                 | 0.33    | 0.18    | 0.43    | 0.46    |
| 1214 |        |        |                                 | 0.33    | 0.20    | 0.14    | 0.18    |
| 1215 |        |        |                                 | 0.22    | 0.02    | 0.02    | 0.03    |
| 1216 |        |        |                                 | 0.03    | 0.25    | 0.00    | 0.00    |
| 1217 |        |        |                                 | 0.08    | 0.40    | 0.11    | 0.18    |
| 1218 |        |        | haplotype (Pickard et al. 2006) | 0.15    | 0.17    | 0.12    | 0.17    |
| 1219 |        |        | haplotype (Pickard et al. 2006) | 0.26    | 0.10    | 0.42    | 0.37    |

Key appears on page 109.

| 1    | R                                                                                                                              |
|------|--------------------------------------------------------------------------------------------------------------------------------|
|      | Sequence                                                                                                                       |
| 1178 | AGAGGCCATTTAGGTTCTTTGCCAAATGAGAAAATTTGTAATTTGTATCTGCTAATCAC[A/G]TCCACCTACCATATATTCTTTTTCTCTCTTTGCCTATTTTCGGTGGCAAAAAAAAAAACA   |
| 1179 | ATTGCAGTGTTCATTTAAAGCTTTTAAAGTACAGAAGGCTCTAATAATGAGTTTTGCCA[A/C]AATCAGTCTTTGAAGAAATGATTTTGCATGTAGGTTTCATATTTTGGAGATGTCTTA      |
| 1180 | GTAGTTTCTGAACACCCAGAAGCTTGAACAGGACAGCTCCTCTACAAAACGTAAC[A/G]CAGCCAGATAGGACATAATCATTTATGGGGCATCACCTCAGTGCCAGATGCTATATGGTGA      |
| 1181 | AGATTGGCTCCACATTAATAATGCAGAGAAAAAGATGTTTTGCTTAGAAAAAGCTAGAAG[A/G]TGAAGTGTGATTTGCCTTCTCTGACCCTGTGGCAGCTCCTCAAAAATATAGTTCAAGCT   |
| 1182 | TAAAATTGCCTATTACTTAAAAATCTAAAACCTCAGTAGACCCTGTGTGGA[A/G]GCTGGAGCTGCCACGAGCAGTATTTTTGAAAAGTAAAACCTTGACAACATCATGGGAAAAA          |
| 1183 | AAATAACCTGAAAATCATATTATGACCGTTGTTTTCTGAGATTACACCAGTCTAATGGT[T/C]CCCAAATGCAGCGGGGGCAGGCTCTGGACCAGGGGCAGGTTATCTGGTTAagaatcacct   |
| 1184 | TATGAGTGTAAAGAGCCCAAGGGTCTCCTTCAAGTGCATTTGGTTTAGAGATGTCTATAT[A/G]TTATCTGAAAAGTTGTCTGTATGGCTCGTCTTTATACCAGGAAGCTCCGTTTTCTTTATCC |
| 1185 | CCTAGACTTCTCTGTAGTCAAGGTGAAGTCTAGATGACAGATTTGCTATGTTGAGGCAG[A/C]TTTTTGCAAAAGGAAGGAAGAGGCCCTGGCTCTTAAATGGCCATACTATTGACCCTGTAA   |
| 1186 | AGTTGGACATTACTGCTCCAGTGTTAAATGGTTAACACCAATTGCAATGCATCAGCTA[T/C]AACAAAGAGTGCCATTTCTCTGGGACTGTGATAAAACAACCTTGTACAAAACCTGTTTTTA   |
| 1187 | GGATTTTATAAGGCAGCTTATCATAGATATACTAATGCCATTTAATGCTCATGCATTTTA[T/C]AACTCTTTCATGCATTCTGTAAAATCAAATTTTTATTGCCAAAAGGAACAAAGCAAG     |
| 1188 | CATGGGCCAGCTCAGGGTCCCCACTGCCCCAGGGAGAAGAAGTGGGCTGGGAAAAGG[T/G]GGCAGCTGGCTTTACTTACGGACTGGCTGCGTCTTGAAGTGGAGGCCGCGCTGATCTC       |
| 1189 | TTTTTTTCACTCAGTATCTGTGTGCCTCAATGATCTTTTTTCCACCTTCATTTTTCTT[T/C]CTCAGCGGCATCTGCTAGCTCGTCTACCCTGTTCCATTGTCTCCACCAGATAGTGAGT      |
| 1190 | CAGAAGGAGGGACAGCAAAGCGAAAGCCGGGAAGGAGATGCTGTTCTTTGTGCTCAG[C/G]GTTTGCCTAATCCTTGGCTATTTTAACTAGAGAGTCGATTTGGAAAAGCCTCCTCATGC      |
| 1191 | TTCTTTGATACGAGGAGGAACCAGAGAGAAGGCTAAGGAAGAGCCACTACTTATCATC[A/G]TAGGGCCAGCAGCATGCTGATCACCTGGGCGTTTTTAGACCTGTAACAAGATCCTCCA      |
| 1192 | GCCCACTGTTGGACTTGACAGCAGAACCTAGTCCCAGGTACCTCCATCTATTTGCTGCC[A/G]TTGTAGAGACCAGGTACACTGCATGGAATAGAAAAACCTTATTCAGTCCAACAGATGTT    |
| 1193 | GAGTGGCTGGGAAGACTCGGGGCTCCCCAGCATCAAATGGCTGCTGGGTCTCAAAGTTC[A/G]GAGAAAAGTCCCTAACCTTTAGGTTTTGTAAGTGTCTTGCCAAAATTCAGTGGCACCAGCT  |
| 1194 | TTAGAATAAGCGCCATGTCATTACCTATTGCTGAAATCTTGAAGCTCAGGTGTTGACT[A/G]TACTACGATTAGGTCTGATGGTATCGCACACCCAGGATGCCAACAGCGCCAACCTCCCGC    |
| 1195 | CTTCTCTGGGGCTCTAGGGTTGCTGGAGCCTGAGTCAGGGCCAGAGGCTGAGTTTTCT[C/G]TTTGTGGGGCTTGGCGTGGAGCAGGCGGTGGGGAGAGATGGACAGTTCACACCCTGCAAG    |
| 1196 | TGGTCTGTAGCTCACATTTAGGAGAAAACAACAGCCAATTAATCAAGCAATTACATCTA[A/C]GGGTGATAGGGAGTAGGAAATGGAACAGGGAGAGAGATACATAACCTAGTTCAGGTATTC   |
| 1197 | AAATGACTCACCCAGGTTTCATAGAGCCTATTGCTTTTCAAGCAGGATTGCAATTAAGGT[T/C]TCTAGACAGGTCCCCTGCTTTATCCACAGGGCTCTCTGACTCCTGGAAAGGGCTCAATC   |
| 1198 | GCTGCAAAGTAATTAGATGATCAATCGTAGAAAAGTCTAAAGCAAATGGAACCTTTAGGG[A/G]GAGAGATTTGTGTTTGTCTGTGTCATGGAATATCAGCAGGGGAAGAAAAGGAACCTAAAG  |
| 1199 | TCTGTCTTCTCAAGCTCATTGCACTTCCGAGAGGGGACTGGGGTCAAGCCTCATT[C/A/G]GGTCCCTAGAGTGGAAAGGATTGGTAAGGAGCTGGGTAGCTCTCCTTGGCCACCTCTAA      |
| 1200 | TAGAAAATATGATCTGGGCAGCATGGAATATTGTATCAGACAGATCTAGGCTCAAATA[A/C]CAGCTTCAGTCTCACCACCTGTGTGGCCTTGATTAACACTTTACTTTCTATCTGAGT       |
| 1201 | GAGTCTGGCGAATTAAGATATCTTTTCAAGCCTTTTCAAGCCTTCTACCTCCACTGCC[A/C]CTCCCTAGATCAGGCTGCCAGCATTGCTCCTGAACAACCTGCAAACTCCTAGGTACT       |
| 1202 | AGTCCCAAAGGAGAAGACTGGCGAGCAGACGGTGGAGACCCAGCCTGCAATCACAGCT[A/G]TTACTCTGGGTGTGGGTGGGAGCGCAGTGGGCGGTTCGAGGGTTGCGTTCCCGCCTCAAAA   |
| 1203 | CTTTCTTTTTCTTTCTTTCTTCTGTCAGCAATTAGTTACCAACTGTCCCTCAGTTTTGCCAG[A/G]TTCTGTGTGAGATTGAGAAGTACACACAGAAAAGAAAACCAGGCCCTGATCCCGCACCC |
| 1204 | GGATGGTGGGGCAGCTGCCTAGCTGGAGCCTGGGACTCAGTGCCCCCAACCCCTCTCT[T/C]GCAGAGTTATGTCATGCCAGGCCAGCAGGGGGCTCCATGAGGATTCATAGAAGATGCCC     |
| 1205 | AGACAAGGGAAAAGGATAAAAAACACCAGTTTCTTATCCTGTTATGCTGTGATTAATAA[T/C]ATCTAATCCACCGAGATTCAAATATACCAGCTGAATCTTTGCCTGTAGAGGATTACCC     |
| 1206 | GAGACAGCTGGGAAGGGGCTGTGTAACAGGAAGTATTTTACAGTTGATTAGTAATCT[T/C]GCCACTCCTAACATGTCAGGGCACTAAAGGAGTAGCCTGAGAGCTGAGTGTGATCTGAGC     |
| 1207 | CCATGTCCCTGGGGCAGGCCGGCTTTTTCTCCATGCACACACCTGGACCTAGGCATTCTT[T/C]TCCCTATCAAACCTATTTTTTGAAGACCACCAACCAATGGCATTTTTCTTGGTCTTCT    |
| 1208 | TGATTGGCCTGCAGAGGCTGGCAGTTGGCAGTTGGAGCCGCATGCAGATAACTGAG[C/G]GCAGCCAAGGACCCAACTGAGTGCAGCCTCTGGAAGGAGCAATTGAAGGGACAAGACCAG      |
| 1209 | catttaggaggtcttcagtaatccaggtgagagaggttgctgcttgcaggatgca[A/G]cagtaaggttgtaagaaaggttgaattcggatagatggaaggttaagccaacaga            |
| 1210 | TCACCGCTATTGAAAGGCTGGGAGAGCATAGCATACACTTTTGCATCCACATGGTGTCTC[A/G]ACACAGCTAAGTCTCAGTCATAACAACAGCAACTATGGATAGCACCTTTAGACTTTAGT   |
| 1211 | GAGGACACAGAAGATTAAGCACTTACTGAAAAGTATCAAATGTGTCTAATAGAGGAAGT[A/T]TGAAGTACTACAGCGTCCCATAGCAAGGCCCTGTGACCTGGTCTGGGAGTTAAGGATGGC   |
| 1212 | ATGGATCCAAAGTCTAGACATTAGACATTGAGCACCAATAGCTGCTAATACTAAAAACAG[A/G]GCAAAAAGCAGGCATTGTGTGTTTCTAATGAAGTGCATAGCTTTGGCTAAAAGAATAGAA  |
| 1213 | TGTCATCATCAGGAATGACAGATTCCTCAGAGAAGAGGCAGAGCTCAGGTTTCCCATCTT[T/C]TCTAAGCAGTCACTCAGTAGGATTTCAAATACAGACAACCTTTGAATGAATGCAGTCAAC  |
| 1214 | GAGACTACATACCCTATTTTCTTTTTTGGCAAAACAGTCATCATTTTCAATTCACAAA[T/C]ATATGAGTAGTTATTCTACATCCAGCCCAATCTTAGGTGCTGTGGGGGAGACAACAGGTA    |
| 1215 | AGACACAGCCAGAGAGAGACAGACTGAGGTTTGGCTAAAAGCCCATGCTACTCCATTG[A/G]CCACACCACCTTCTGGACGCCCAAGGCAGGTATCCTGGCCAGCAGACACAACCTCACT      |
| 1216 | AAATTCACAGCACAGAGCTGCCTGGGTGATGGTGGCATGATAAAATTACCTTAACTCCC[A/G]GCATCTGTTTATGCCACATAGTGAAAGTTAATGAGGGCTGACCCCTCAGCAAACTGGGAA   |
| 1217 | AAAAAGCCAAAAGGACAGGACTGCCAAAAGCCTTTGGGGCAGGACCACTCAGAGCCTTGT[C/G]GGGCTCAGCCTCTGCCCCAGTGTGTCTAGAAGGCAGGAACCTGCCCCTAACAGGTCTAGC  |
| 1218 | GGCCACGCCCTTGGTGAATGAGGACTGTAAAACAGCTGACTCATAGGTAGAGGGGATAA[A/C]CTGGGCTCTGAGTTAGAAAAAATGTCCCCTGGGACTTTATAACCACAGACTACTCTCAA    |
| 1219 | GGACACCCTCATGTCTGCTGCAGTCTTTGCTCTGAAGGCAGGAGATCACTGGATGCTCT[T/C]AGAGGGGAATTAGGCTGAAGAACAATGATTGCTTTGTAACAAGTTATCCCAAGACTTA     |

|      | A        | B         | C          | D                                                       | E         | F     | G          | H             | I      | J          |
|------|----------|-----------|------------|---------------------------------------------------------|-----------|-------|------------|---------------|--------|------------|
| 1    | Cytoband | Gene Name | Gene Alias | Description                                             | Size (kb) | Chrom | SNP ID     | Position (bp) | htSNP* | Coding     |
| 1220 | 11q23.3  | GRIK4     | KA1        | glutamate receptor, ionotropic, kainate 4               | 325.9     | 11    | rs1815771  | 120161689     | T      |            |
| 1221 | 11q23.3  | GRIK4     | KA1        | glutamate receptor, ionotropic, kainate 4               | 325.9     | 11    | rs879602   | 120161782     | T      |            |
| 1222 | 11q23.3  | GRIK4     | KA1        | glutamate receptor, ionotropic, kainate 4               | 325.9     | 11    | rs3133860  | 120166388     | T      |            |
| 1223 | 11q23.3  | GRIK4     | KA1        | glutamate receptor, ionotropic, kainate 4               | 325.9     | 11    | rs1954787  | 120168573     | T      |            |
| 1224 | 11q23.3  | GRIK4     | KA1        | glutamate receptor, ionotropic, kainate 4               | 325.9     | 11    | rs1939670  | 120184769     | T      |            |
| 1225 | 11q23.3  | GRIK4     | KA1        | glutamate receptor, ionotropic, kainate 4               | 325.9     | 11    | rs7105286  | 120192444     | T      |            |
| 1226 | 11q23.3  | GRIK4     | KA1        | glutamate receptor, ionotropic, kainate 4               | 325.9     | 11    | rs4935752  | 120194329     |        |            |
| 1227 | 11q23.3  | GRIK4     | KA1        | glutamate receptor, ionotropic, kainate 4               | 325.9     | 11    | rs6589846  | 120205357     | T      |            |
| 1228 | 11q23.3  | GRIK4     | KA1        | glutamate receptor, ionotropic, kainate 4               | 325.9     | 11    | rs7121233  | 120222363     | T      |            |
| 1229 | 11q23.3  | GRIK4     | KA1        | glutamate receptor, ionotropic, kainate 4               | 325.9     | 11    | rs11218030 | 120225204     | T      |            |
| 1230 | 11q23.3  | GRIK4     | KA1        | glutamate receptor, ionotropic, kainate 4               | 325.9     | 11    | rs4331110  | 120235879     | T      |            |
| 1231 | 11q23.3  | GRIK4     | KA1        | glutamate receptor, ionotropic, kainate 4               | 325.9     | 11    | rs4344499  | 120239629     | T      |            |
| 1232 | 11q23.3  | GRIK4     | KA1        | glutamate receptor, ionotropic, kainate 4               | 325.9     | 11    | rs3802912  | 120243607     | T      |            |
| 1233 | 11q23.3  | GRIK4     | KA1        | glutamate receptor, ionotropic, kainate 4               | 325.9     | 11    | rs12577602 | 120260428     | T      |            |
| 1234 | 11q23.3  | GRIK4     | KA1        | glutamate receptor, ionotropic, kainate 4               | 325.9     | 11    | rs7111184  | 120276273     | T      |            |
| 1235 | 11q23.3  | GRIK4     | KA1        | glutamate receptor, ionotropic, kainate 4               | 325.9     | 11    | rs2156635  | 120276878     | T      |            |
| 1236 | 11q23.3  | GRIK4     | KA1        | glutamate receptor, ionotropic, kainate 4               | 325.9     | 11    | rs2156634  | 120281211     | T      |            |
| 1237 | 11q23.3  | GRIK4     | KA1        | glutamate receptor, ionotropic, kainate 4               | 325.9     | 11    | rs2156633  | 120292102     | T      |            |
| 1238 | 11q23.3  | GRIK4     | KA1        | glutamate receptor, ionotropic, kainate 4               | 325.9     | 11    | rs949295   | 120295062     | T      |            |
| 1239 | 11q23.3  | GRIK4     | KA1        | glutamate receptor, ionotropic, kainate 4               | 325.9     | 11    | rs10502243 | 120300651     | T      |            |
| 1240 | 11q23.3  | GRIK4     | KA1        | glutamate receptor, ionotropic, kainate 4               | 325.9     | 11    | rs949054   | 120301098     | T      |            |
| 1241 | 11q23.3  | GRIK4     | KA1        | glutamate receptor, ionotropic, kainate 4               | 325.9     | 11    | rs2852241  | 120302794     | T      |            |
| 1242 | 11q23.3  | GRIK4     | KA1        | glutamate receptor, ionotropic, kainate 4               | 325.9     | 11    | rs10892647 | 120309501     | T      |            |
| 1243 | 11q23.3  | GRIK4     | KA1        | glutamate receptor, ionotropic, kainate 4               | 325.9     | 11    | rs602104   | 120314593     | T      |            |
| 1244 | 11q23.3  | GRIK4     | KA1        | glutamate receptor, ionotropic, kainate 4               | 325.9     | 11    | rs2298724  | 120328931     | T      |            |
| 1245 | 11q23.3  | GRIK4     | KA1        | glutamate receptor, ionotropic, kainate 4               | 325.9     | 11    | rs672176   | 120334459     | T      |            |
| 1246 | 11q23.3  | GRIK4     | KA1        | glutamate receptor, ionotropic, kainate 4               | 325.9     | 11    | rs734167   | 120334569     | T      |            |
| 1247 | 11q23.3  | GRIK4     | KA1        | glutamate receptor, ionotropic, kainate 4               | 325.9     | 11    | rs4936570  | 120339783     | T      |            |
| 1248 | 11q24.2  | FEZ1      |            | fasciculation and elongation protein zeta 1             | 50.5      | 11    | rs6590145  | 124823126     | T      |            |
| 1249 | 11q24.2  | FEZ1      |            | fasciculation and elongation protein zeta 1             | 50.5      | 11    | rs11220083 | 124833570     | T      |            |
| 1250 | 11q24.2  | FEZ1      |            | fasciculation and elongation protein zeta 1             | 50.5      | 11    | rs12223186 | 124836849     | T      |            |
| 1251 | 11q24.2  | FEZ1      |            | fasciculation and elongation protein zeta 1             | 50.5      | 11    | rs2849222  | 124858699     | T      |            |
| 1252 | 12p13.1  | GRIN2B    | NMDAR2B    | glutamate receptor, ionotropic, N-methyl D-aspartate 2B | 418.9     | 12    | rs1805502  | 13605448      |        |            |
| 1253 | 12p13.1  | GRIN2B    | NMDAR2B    | glutamate receptor, ionotropic, N-methyl D-aspartate 2B | 418.9     | 12    | rs890      | 13606575      |        |            |
| 1254 | 12p13.1  | GRIN2B    | NMDAR2B    | glutamate receptor, ionotropic, N-methyl D-aspartate 2B | 418.9     | 12    | rs1805247  | 13607242      |        | His1399His |
| 1255 | 12p13.1  | GRIN2B    | NMDAR2B    | glutamate receptor, ionotropic, N-methyl D-aspartate 2B | 418.9     | 12    | rs1806201  | 13608775      |        | Thr888Thr  |
| 1256 | 12p13.1  | GRIN2B    | NMDAR2B    | glutamate receptor, ionotropic, N-methyl D-aspartate 2B | 418.9     | 12    | rs4764011  | 13611689      | G      |            |
| 1257 | 12p13.1  | GRIN2B    | NMDAR2B    | glutamate receptor, ionotropic, N-methyl D-aspartate 2B | 418.9     | 12    | rs2268092  | 13612439      | G      |            |
| 1258 | 12p13.1  | GRIN2B    | NMDAR2B    | glutamate receptor, ionotropic, N-methyl D-aspartate 2B | 418.9     | 12    | rs1806209  | 13612543      | G      |            |
| 1259 | 12p13.1  | GRIN2B    | NMDAR2B    | glutamate receptor, ionotropic, N-methyl D-aspartate 2B | 418.9     | 12    | rs1806194  | 13614394      | G      |            |
| 1260 | 12p13.1  | GRIN2B    | NMDAR2B    | glutamate receptor, ionotropic, N-methyl D-aspartate 2B | 418.9     | 12    | rs2193147  | 13624088      | G      |            |
| 1261 | 12p13.1  | GRIN2B    | NMDAR2B    | glutamate receptor, ionotropic, N-methyl D-aspartate 2B | 418.9     | 12    | rs1805470  | 13627299      | G      |            |

Key appears on page 109.



|      | K      | L      | M                                                         | N       | O       | P       | Q       |
|------|--------|--------|-----------------------------------------------------------|---------|---------|---------|---------|
| 1    | Prom** | TFBS** | Association (reference)                                   | MAF_CEU | MAF_YRI | MAF_JPT | MAF_HCB |
| 1220 |        |        |                                                           | 0.12    | 0.00    | 0.06    | 0.01    |
| 1221 |        |        | haplotype (Pickard et al. 2006)                           | 0.18    | 0.05    | 0.11    | 0.01    |
| 1222 |        |        |                                                           | 0.10    | 0.40    | 0.03    | 0.19    |
| 1223 |        |        | haplotype (Pickard et al. 2006)                           | 0.47    | 0.06    | 0.03    | 0.19    |
| 1224 |        |        |                                                           | 0.09    | 0.32    | 0.00    | 0.00    |
| 1225 |        |        |                                                           | 0.41    | 0.35    | 0.43    | 0.46    |
| 1226 |        |        | p=0.001 (Pickard et al. 2006)                             | 0.36    | 0.05    | 0.43    | 0.44    |
| 1227 |        |        | p=0.004 (Pickard et al. 2006)                             | 0.33    | 0.24    | 0.48    | 0.47    |
| 1228 |        |        |                                                           | 0.38    | 0.05    | 0.47    | 0.44    |
| 1229 |        |        |                                                           | 0.14    | 0.02    | 0.44    | 0.33    |
| 1230 |        |        | haplotype (Pickard et al. 2006)                           | 0.40    | 0.44    | 0.39    | 0.29    |
| 1231 |        |        |                                                           | 0.20    | 0.33    | 0.39    | 0.29    |
| 1232 |        |        |                                                           | 0.33    | 0.19    | 0.40    | 0.49    |
| 1233 |        |        |                                                           | 0.10    | 0.42    | 0.46    | 0.43    |
| 1234 |        |        | haplotype (Pickard et al. 2006)                           | 0.31    | 0.32    | 0.18    | 0.29    |
| 1235 |        |        | haplotype (Pickard et al. 2006)                           | 0.41    | 0.25    | 0.34    | 0.38    |
| 1236 |        |        |                                                           | 0.16    | 0.04    | 0.06    | 0.09    |
| 1237 |        |        |                                                           | 0.31    | 0.38    | 0.06    | 0.08    |
| 1238 |        |        |                                                           | 0.43    | 0.23    | 0.47    | 0.46    |
| 1239 |        |        |                                                           | 0.17    | 0.36    | 0.02    | 0.00    |
| 1240 |        |        | haplotype (Pickard et al. 2006)                           | 0.18    | 0.06    | 0.43    | 0.42    |
| 1241 |        |        |                                                           | 0.07    | 0.13    | 0.00    | 0.02    |
| 1242 |        |        |                                                           | 0.27    | 0.13    | 0.36    | 0.39    |
| 1243 |        |        |                                                           | 0.21    | 0.18    | 0.02    | 0.00    |
| 1244 |        |        |                                                           | 0.31    |         | 0.28    | 0.26    |
| 1245 |        |        |                                                           | 0.37    | 0.49    | 0.02    | 0.00    |
| 1246 |        |        |                                                           | 0.22    | 0.01    | 0.36    | 0.38    |
| 1247 |        |        |                                                           | 0.27    | 0.46    | 0.24    | 0.31    |
| 1248 |        |        |                                                           | 0.09    | 0.12    | 0.30    | 0.27    |
| 1249 |        |        |                                                           | 0.01    | 0.01    | 0.00    | 0.00    |
| 1250 |        |        |                                                           | 0.50    | 0.29    | 0.30    | 0.40    |
| 1251 |        |        |                                                           | 0.23    | 0.45    | 0.11    | 0.07    |
| 1252 |        |        | haplotype (Ohtsuki et al. 2001)                           | 0.20    | 0.45    |         | 0.16    |
| 1253 |        |        | p=0.044 (Di Maria et al. 2004)                            | 0.50    | 0.09    |         | 0.21    |
| 1254 |        |        | p=0.017 (Li and He 2007), haplotype (Ohtsuki et al. 2001) | 0.10    | 0.40    |         | 0.16    |
| 1255 |        | Y      | p=0.070 (Ohtsuki et al. 2001)                             | 0.22    | 0.07    | 0.47    | 0.46    |
| 1256 |        |        |                                                           | 0.43    | 0.46    | 0.01    | 0.04    |
| 1257 |        |        |                                                           | 0.09    | 0.03    | 0.14    | 0.17    |
| 1258 |        |        |                                                           | 0.12    | 0.08    | 0.23    | 0.26    |
| 1259 |        |        |                                                           | 0.43    | 0.02    | 0.01    | 0.04    |
| 1260 |        |        |                                                           | 0.38    | 0.00    | 0.01    | 0.04    |
| 1261 |        | Y      |                                                           | 0.18    | 0.38    | 0.00    | 0.00    |

Key appears on page 109.

|      | R                                                                                                                               |
|------|---------------------------------------------------------------------------------------------------------------------------------|
| 1    | Sequence                                                                                                                        |
| 1220 | GCACTTGGGGTGTTCGTTTACACAGCAGTCCCGTGACACAGGGAAATGGTTCTCTGC[A/G]GCGCCTGAGCAGCTTGATTCTGTGCATGCCTCCGCTCTCCATGCGCATCCTCTGGTGG        |
| 1221 | TGAAGTGTGATGGGCTTGGCAACCCCGCTGAGTGGGGGCTCTGTGTGCCAAAAGGCC[A/G]GGAGGCGAGTTAGCTGGGGATGAGCACAGAGCCACCAGGAGGATGCGCATGGAGACGCG       |
| 1222 | TGTTTTTTTTCAGGTGGTCTCTCCTGGAACGTACTCAGCTGTTTTTAAAACCCATG[A/T]CCAAATCCTACCTAATAACCCTCATTCTCATACCCCATCCACCGTGCCCCAGGTAAGC         |
| 1223 | AGTGGACTGGTTTTGAGAAATTTGAGGAAGTACAACCAAAAGCAATTTGGAGACTGGTTAT[T/C]JGGAAGGTGCGGAATTTGGGTGAAGGCAGATGCCTGGGTAGCTGGTGTCTATTAATAA    |
| 1224 | CCCCACGGGGCTCACAGAGATGTGCACTGGGGAGGGCTGGGAGAAGTCAAGAGTCTTAC[A/G]JGGAAGGCAGTCCCGATGTGCAGCCTGAATGGAGCAGAGGGTGCAGTCTCCCTCTGAGC     |
| 1225 | GAGGCTCAGCCTTCCAGAAGCTCTAGTCTCAGGAGGACACAGTTCCTAGAAAACAGGAGA[A/G]CACTTGTGCAGGAGGGACTGGATGCCTCCTCAGTGAGCCGCTCCTGCCAGGGCAGGAGC    |
| 1226 | TCTGTTTTGTTACTTTAGACAGAGTGGATGGGATACAAAATACAAGCGGGAAGAAAG[A/C]TCCGTTATGACACAGATCAATGTCACTCTTTAGAATTGCCTTTCATAACTCACCAGACTC      |
| 1227 | TAAAAAAAAAATTAATTCAGGCTGCCAAAACAAAACGGGGATGTGATTTGAACCTCATCA[T/G]CAACTTAGCTGCGAGTGCCGggaccctaaactcctgagggcagggactgtatgtgaccg    |
| 1228 | GTCTATTAATGTGAGGTGTGGCAGCCCAGAGGAGAGAGCATGTAGTTCTTCTTTGGGAGT[T/C]TGGATGAGGGTTTACAGATATGGCTTCCCTTACTGAAGCATGGGTTAGAGATGGCAATTG   |
| 1229 | GTGCATATAAAATACATCAAACCTGAAATAAGAACAAGACCCTGGAGACTACTGTGGTTCA[A/G]TATCTCTGGACACATAATGGAAATGCTCCCTTTGACTGCCAGGCCCTTCTATCTAATAG   |
| 1230 | TCCAGTTTGACGTGTAAGCTAATGAAGCTGGGCTCTGGGTAGGTGAGCTGAGGCCTGTA[A/G]CCTGAGGCCTTGGCAGTGTCTGGAGCTGTGTGGCAAGGATGCAAGGGTGGCGCCAGGGGC    |
| 1231 | TGGTGAGTTTTTAAATAGGAGCGATGCCTGTCTCTGATAAGACATGCCAGAGGCAAAG[T/G]CATATCTAGACATCTATACACTTGGCATCTAATTAGTACTTGGCCAACACGGTGACCTTG     |
| 1232 | CTGTCGGCCACTGGCAGGTATGGCCTGGGGCATGGACTGATCTTGTCTTCTGGTTAC[T/C]TCTCAGTTCAGCCACTCCTCTCAGTGCCTTAGAACGGGGCTCCCTCTCCAGAAAGCT         |
| 1233 | AACCACGCAAAGACCGCCATGCCAGCCAGGGGGTGCACACCAGCTGTACCAGGCTG[T/G]CCACTCAGGGCTCAGGATGGCCTCCACAGCCTCTCCCTCTCCTGCCTCTCTCCTCC           |
| 1234 | GGGTTGGGTCCATAGAGCTTAGGAACTTGAATGCCAGGCTACTAAGTTCCCTTCACTGT[T/G]JAGGAGATGGGGTCACTGAACATTTTCATTcattcattattatgtgatgactgtttatt     |
| 1235 | CGGATGGATAGAAGAGGACAGATCCAGAAGATTTTTAGAGACTAAGAAGACAGCGGGAAG[C/G]JAGGTCCCAGCAATCACACTGGGTGCTGCACCCCTCCCCAAAGTGGACTCAGCCAGGCT    |
| 1236 | CTCGTAGCGGTCATTGCCCTCCATCTCCTGGTGGTTCCCTTTCAGCATTAAATATGGGTT[T/C]TCTGCAGCAAACTGGGCAGCTGTCACTTCTCATCTTAGCCCTGGTGTCTACCCGCGTG     |
| 1237 | CTAGCACTCCTGGGCGTTAGCTTCTTGGGGCTCTGTTTTCTTAGTCTGAAAAACGAGGTG[A/G]TCAATAAGAAGTCCAGTTTCCAGATAAGAGGGTTGAGGACAGAAGTGTGAGCCAAATGTCC  |
| 1238 | ACATTTGACACCTCACACCGTTCCCTCTGCCGGCAACTCTCTCCTCCTTGTGCGCTGTCA[A/G]ATTCTACTTGTCTATCAAGGTCTGACTTGACGGCACTTCCCTGAGAGGCATTGCAGTGG    |
| 1239 | TTCTCCTCATCTCTAAATAGGTTACTGCCAACCTTAGACGTTGCTGTGGGTCTCAAGAAC[A/G]ATCTGTGAAAAACAGTTTTGGGGTATGACTATTGATGGGCATATGAGCCATGTCAACAA    |
| 1240 | CACGGGCTGTTATTAGGACTGTTTTGTTGGGTAAAAATAAGTACCACCAACTTCTGTG[A/G]GCATCGCCACAGCCATAGAGAAGTCTAGAGGCCTTCCCTGTGCTCCTTCTCTGTTCCC       |
| 1241 | TAATGGGCCCTCTCCTCGAGACACTCTGGCTCATTACTGCTTTATTTTTCACAGC[A/G]GAAATCATGACCTGAAATTGCTTGTGTTATTTACCAGTTTACCTGTTGATTGTCTAGAGT        |
| 1242 | AATAAATGACTTGTCCAAGGTCATAACAACAGGTAAAGTGAAGTGCAGTCCAGGTAGTTCTA[A/G]GCCACACTGAAAACTAAGTTCAGTTACCCCTCTACTGCCTTAATAGCCCTTATTGATA   |
| 1243 | CCCCACTTTCTTGACGTGTTTGTACGTAGTCACTTCCAGACTGATTGACGTTTGTAGA[T/C]TGTGGACCACACTTCACTTTTCTTATTTTCACTTTTTGCATCAACTGATCGACCAGCATT     |
| 1244 | TTCCCAAActcctcctccccctcctcctccccaccctccccATGCAGTTCACAGAGG[T/C]JGGACACAGGTTGGCGGTGAAGGACAGGGAAGGGAAGGAGAGTACCGAGCCACCAGGA        |
| 1245 | TTTGGTCCGTTCCATGGAGGAGTGGGAGGTCAAGAAGACAGGGCCATCGTGGCCTACCTCG[A/G]CCTCCTCACCCAGAGCAGTGTAGAAAAACACCATGTGCGTGGAGAGAATGCCAGTTTGA   |
| 1246 | GCACAAGCGGCTCAGTGCAAAACCCATCGGCTCTGCTGAGAAAAGGAATGATGCCCGCTT[C/G]JGAGGGCTCAGTGGAGCCCTGCTCCTGTGTCAAAGGGCATTTCAGTTGTCAAACCTGGCA   |
| 1247 | CCTCAGTTATCTAATTCATAAAATTAGTTTTCTAATACCTACATTATGGGGTTGGGAGGA[T/C]TAAACCTGATAATCTAGTTAGGTGCCTTACCTCAGTGTCTCACACTGAGCCTACCTTGGG   |
| 1248 | CTTTAAAATAACATGGGAGGGGAGAAGTTGGGTAGAGGCGTAAATGAAATAAGCCTGGCC[C/G]GGACTTAATAACTGTTGATGCCAGCTCATCAGTACCTGAGAGTGTATTATGCCATTTCTCCT |
| 1249 | ACAGTCATAATTACTATAAACCTGTGTGAGAGAGTTAAGAGGATGGCCTCTGGAGTTAAC[C/G]TACCTGGCTTCAAATGTTAGCTTACCCCTTATGGCTTCTGCATGGACTAAGCACAAATA    |
| 1250 | CAGGTCTTTAGATGAGTTTTGCCAACCTTACCTTTGTCTGTTCTCCATGGATGGACT[A/G]AAGTCCCCGAGGCCAGCATTGTACTCTTTGAGGTGGTTTCTTACAGTGGGCTGGACCAA       |
| 1251 | AATGCAGTGATGTAAGAGTAGTCCCTGCAGTGACCTTTCCAGCGGGTGTGGTGCCTTGG[A/G]TTTTGTCTTGGAGAAAGCAAATCCTATTTGCTTCTTGGCTCTAGAATGCTAATGGCACTT    |
| 1252 | TACATGTATATCTTTTTTTTATTCTCAATGGTACAATCTGAGAGGGAAACAAGGTGTTGC[A/G]GGAAGGTAGAAGGGCTTCTACCAAGAGTGTCACTCTGGGCTCAAGTCACTTCCAGGG      |
| 1253 | GAGTGAAGCTGGGAGAACAAAAAGAGGCTATGTGAGCACAAGGTAGCTTTTCCAAAC[T/G]GATCTTTTCAATTTAGGTGAGGAAGCAAAGCATCTATGTGAGACCATTAGCACACTGCT       |
| 1254 | CGGCCTGGCTTTCGACGCCCCCGCCACCGTGGGCTGCCTGAAGAAGTAGGATTTGCTGCC[A/G]TGGAGCAAGCACTGGTGTGCCAAAAAGTGGGGATGAAAGGGTTTTGCGTGACCCGGTCA    |
| 1255 | CATGTTCTTGGCCGTGCGCAGCAGGCGCAGGATGTTGGAGTGTGTGTTGTTTCATGTTGC[A/G]GTGGGGGAGTTCATTACAGACTGGCGCTCCTCGATCGCCACCCATGGATGCAGCTGTAG    |
| 1256 | TTAATGCCATTACATATAATTCATCAACGTAAGTAAAGCATTCAATAAAAAATTCAC[A/G]TGAGTACCGCAGGCGATATGAACACATGAGACGTTGCTCCCGCTCTCCATTATCTAGCCT      |
| 1257 | GACTTTTTCCACTTACCAGATGCTAGGAAGTAGGAGGAAGTAGGAAGAGGTCCCAGAC[A/T]AAAGGAAAGTAAAGAAACCATGTGCCCTAGAATGCATCTAATTCTAGACAAGCAAAAT       |
| 1258 | TCTAGACAAGCAAAATCTGAAAAATCTCATGGAGAAAAATGCCTATTCCCATAGTTCTA[C/G]TTTGGCTAAAAATGAACTTTGCTTGATAATCTGACTAAAGTTTTGGCAACTTTTGA        |
| 1259 | AGTAAGGTTAAGTTGAACTCTGCCAGAATCTAAAGCCTAAATCCCAGGCTGTTCTTTA[T/C]GTGCTTTTGGGTGAAAGGAGGAGTTCTTTTCTTCCCACTGGGAATGATGAGAATGTAAG      |
| 1260 | ATGTTAACGCCCATCGCCACCCCTTCCAAAGCCAATCCATCCTCCCTGCCAGCTTCAATTT[C/G]AGCCTCCTTCTAGAAGCCTTTCAGGAAATTTATATGTCAATGGCGTGCACCTCTGTGGTC  |
| 1261 | TCCTATATTAATAATTAACCTTAAACATATCATAACCTGCACCTGAGGTTTTAAGTGT[T/C]TGGCAAAGTCTGTGTCTGGCCATAAAATACATCAGTAGCACACATTTAAAGGGCAT         |

Complete list of all 94 genes and 1,536 SNPs present on the COGS SNP Chip

|      | A        | B         | C          | D                                                       | E         | F     | G          | H             | I      | J      |
|------|----------|-----------|------------|---------------------------------------------------------|-----------|-------|------------|---------------|--------|--------|
| 1    | Cytoband | Gene Name | Gene Alias | Description                                             | Size (kb) | Chrom | SNP ID     | Position (bp) | htSNP* | Coding |
| 1262 | 12p13.1  | GRIN2B    | NMDAR2B    | glutamate receptor, ionotropic, N-methyl D-aspartate 2B | 418.9     | 12    | rs7970177  | 13630255      | G      |        |
| 1263 | 12p13.1  | GRIN2B    | NMDAR2B    | glutamate receptor, ionotropic, N-methyl D-aspartate 2B | 418.9     | 12    | rs1805490  | 13632338      | G      |        |
| 1264 | 12p13.1  | GRIN2B    | NMDAR2B    | glutamate receptor, ionotropic, N-methyl D-aspartate 2B | 418.9     | 12    | rs2268097  | 13644099      | G      |        |
| 1265 | 12p13.1  | GRIN2B    | NMDAR2B    | glutamate receptor, ionotropic, N-methyl D-aspartate 2B | 418.9     | 12    | rs1805513  | 13644916      | G      |        |
| 1266 | 12p13.1  | GRIN2B    | NMDAR2B    | glutamate receptor, ionotropic, N-methyl D-aspartate 2B | 418.9     | 12    | rs11611022 | 13673187      | G      |        |
| 1267 | 12p13.1  | GRIN2B    | NMDAR2B    | glutamate receptor, ionotropic, N-methyl D-aspartate 2B | 418.9     | 12    | rs1805543  | 13675580      | G      |        |
| 1268 | 12p13.1  | GRIN2B    | NMDAR2B    | glutamate receptor, ionotropic, N-methyl D-aspartate 2B | 418.9     | 12    | rs1805545  | 13679765      | G      |        |
| 1269 | 12p13.1  | GRIN2B    | NMDAR2B    | glutamate receptor, ionotropic, N-methyl D-aspartate 2B | 418.9     | 12    | rs1805552  | 13682595      | G      |        |
| 1270 | 12p13.1  | GRIN2B    | NMDAR2B    | glutamate receptor, ionotropic, N-methyl D-aspartate 2B | 418.9     | 12    | rs980365   | 13711294      | G      |        |
| 1271 | 12p13.1  | GRIN2B    | NMDAR2B    | glutamate receptor, ionotropic, N-methyl D-aspartate 2B | 418.9     | 12    | rs2268102  | 13713506      | G      |        |
| 1272 | 12p13.1  | GRIN2B    | NMDAR2B    | glutamate receptor, ionotropic, N-methyl D-aspartate 2B | 418.9     | 12    | rs2284406  | 13716683      | G      |        |
| 1273 | 12p13.1  | GRIN2B    | NMDAR2B    | glutamate receptor, ionotropic, N-methyl D-aspartate 2B | 418.9     | 12    | rs2192972  | 13723783      | G      |        |
| 1274 | 12p13.1  | GRIN2B    | NMDAR2B    | glutamate receptor, ionotropic, N-methyl D-aspartate 2B | 418.9     | 12    | rs1158541  | 13737940      | G      |        |
| 1275 | 12p13.1  | GRIN2B    | NMDAR2B    | glutamate receptor, ionotropic, N-methyl D-aspartate 2B | 418.9     | 12    | rs2192975  | 13740061      | G      |        |
| 1276 | 12p13.1  | GRIN2B    | NMDAR2B    | glutamate receptor, ionotropic, N-methyl D-aspartate 2B | 418.9     | 12    | rs10492134 | 13750149      | G      |        |
| 1277 | 12p13.1  | GRIN2B    | NMDAR2B    | glutamate receptor, ionotropic, N-methyl D-aspartate 2B | 418.9     | 12    | rs2300253  | 13753218      | G      |        |
| 1278 | 12p13.1  | GRIN2B    | NMDAR2B    | glutamate receptor, ionotropic, N-methyl D-aspartate 2B | 418.9     | 12    | rs2284411  | 13757439      | G      |        |
| 1279 | 12p13.1  | GRIN2B    | NMDAR2B    | glutamate receptor, ionotropic, N-methyl D-aspartate 2B | 418.9     | 12    | rs741327   | 13768808      | G      |        |
| 1280 | 12p13.1  | GRIN2B    | NMDAR2B    | glutamate receptor, ionotropic, N-methyl D-aspartate 2B | 418.9     | 12    | rs2268120  | 13769155      | G      |        |
| 1281 | 12p13.1  | GRIN2B    | NMDAR2B    | glutamate receptor, ionotropic, N-methyl D-aspartate 2B | 418.9     | 12    | rs10845837 | 13771435      | G      |        |
| 1282 | 12p13.1  | GRIN2B    | NMDAR2B    | glutamate receptor, ionotropic, N-methyl D-aspartate 2B | 418.9     | 12    | rs2216128  | 13774281      | G      |        |
| 1283 | 12p13.1  | GRIN2B    | NMDAR2B    | glutamate receptor, ionotropic, N-methyl D-aspartate 2B | 418.9     | 12    | rs2268122  | 13788728      | G      |        |
| 1284 | 12p13.1  | GRIN2B    | NMDAR2B    | glutamate receptor, ionotropic, N-methyl D-aspartate 2B | 418.9     | 12    | rs10492137 | 13817153      | G      |        |
| 1285 | 12p13.1  | GRIN2B    | NMDAR2B    | glutamate receptor, ionotropic, N-methyl D-aspartate 2B | 418.9     | 12    | rs10845840 | 13822124      | G      |        |
| 1286 | 12p13.1  | GRIN2B    | NMDAR2B    | glutamate receptor, ionotropic, N-methyl D-aspartate 2B | 418.9     | 12    | rs2268127  | 13832115      | G      |        |
| 1287 | 12p13.1  | GRIN2B    | NMDAR2B    | glutamate receptor, ionotropic, N-methyl D-aspartate 2B | 418.9     | 12    | rs2284418  | 13834895      | G      |        |
| 1288 | 12p13.1  | GRIN2B    | NMDAR2B    | glutamate receptor, ionotropic, N-methyl D-aspartate 2B | 418.9     | 12    | rs220557   | 13839047      | G      |        |
| 1289 | 12p13.1  | GRIN2B    | NMDAR2B    | glutamate receptor, ionotropic, N-methyl D-aspartate 2B | 418.9     | 12    | rs220558   | 13839332      | G      |        |
| 1290 | 12p13.1  | GRIN2B    | NMDAR2B    | glutamate receptor, ionotropic, N-methyl D-aspartate 2B | 418.9     | 12    | rs2300266  | 13843034      | G      |        |
| 1291 | 12p13.1  | GRIN2B    | NMDAR2B    | glutamate receptor, ionotropic, N-methyl D-aspartate 2B | 418.9     | 12    | rs2300267  | 13843198      | G      |        |
| 1292 | 12p13.1  | GRIN2B    | NMDAR2B    | glutamate receptor, ionotropic, N-methyl D-aspartate 2B | 418.9     | 12    | rs220567   | 13845670      | G      |        |
| 1293 | 12p13.1  | GRIN2B    | NMDAR2B    | glutamate receptor, ionotropic, N-methyl D-aspartate 2B | 418.9     | 12    | rs220599   | 13866565      | G      |        |
| 1294 | 12p13.1  | GRIN2B    | NMDAR2B    | glutamate receptor, ionotropic, N-methyl D-aspartate 2B | 418.9     | 12    | rs2160733  | 13872994      | G      |        |
| 1295 | 12p13.1  | GRIN2B    | NMDAR2B    | glutamate receptor, ionotropic, N-methyl D-aspartate 2B | 418.9     | 12    | rs2284425  | 13880286      | G      |        |
| 1296 | 12p13.1  | GRIN2B    | NMDAR2B    | glutamate receptor, ionotropic, N-methyl D-aspartate 2B | 418.9     | 12    | rs2300273  | 13881701      | G      |        |
| 1297 | 12p13.1  | GRIN2B    | NMDAR2B    | glutamate receptor, ionotropic, N-methyl D-aspartate 2B | 418.9     | 12    | rs2193509  | 13887540      | G      |        |
| 1298 | 12p13.1  | GRIN2B    | NMDAR2B    | glutamate receptor, ionotropic, N-methyl D-aspartate 2B | 418.9     | 12    | rs1120905  | 13895444      | G      |        |
| 1299 | 12p13.1  | GRIN2B    | NMDAR2B    | glutamate receptor, ionotropic, N-methyl D-aspartate 2B | 418.9     | 12    | rs2193511  | 13896054      | G      |        |
| 1300 | 12p13.1  | GRIN2B    | NMDAR2B    | glutamate receptor, ionotropic, N-methyl D-aspartate 2B | 418.9     | 12    | rs2284428  | 13901181      | G      |        |
| 1301 | 12p13.1  | GRIN2B    | NMDAR2B    | glutamate receptor, ionotropic, N-methyl D-aspartate 2B | 418.9     | 12    | rs1160295  | 13901691      | G      |        |
| 1302 | 12p13.1  | GRIN2B    | NMDAR2B    | glutamate receptor, ionotropic, N-methyl D-aspartate 2B | 418.9     | 12    | rs10772713 | 13903800      | G      |        |
| 1303 | 12p13.1  | GRIN2B    | NMDAR2B    | glutamate receptor, ionotropic, N-methyl D-aspartate 2B | 418.9     | 12    | rs2300279  | 13907309      | G      |        |

Key appears on page 109.

|      | K      | L      | M                       | N       | O       | P       | Q       |
|------|--------|--------|-------------------------|---------|---------|---------|---------|
| 1    | Prom** | TFBS** | Association (reference) | MAF_CEU | MAF_YRI | MAF_JPT | MAF_HCB |
| 1262 |        |        |                         | 0.08    | 0.20    | 0.22    | 0.16    |
| 1263 |        |        |                         | 0.27    | 0.08    | 0.35    | 0.31    |
| 1264 |        |        |                         | 0.36    | 0.12    | 0.24    | 0.19    |
| 1265 |        |        |                         | 0.08    | 0.01    | 0.00    | 0.00    |
| 1266 |        |        |                         | 0.11    | 0.08    | 0.01    | 0.00    |
| 1267 |        |        |                         | 0.34    | 0.01    | 0.01    | 0.03    |
| 1268 |        |        |                         | 0.31    | 0.08    | 0.46    | 0.47    |
| 1269 |        |        |                         | 0.26    | 0.05    | 0.34    | 0.33    |
| 1270 |        |        |                         | 0.32    | 0.11    | 0.25    | 0.19    |
| 1271 |        |        |                         | 0.41    | 0.25    | 0.24    | 0.17    |
| 1272 |        |        |                         | 0.28    | 0.12    | 0.39    | 0.30    |
| 1273 |        |        |                         | 0.24    | 0.15    | 0.23    | 0.18    |
| 1274 |        |        |                         | 0.41    | 0.31    | 0.34    | 0.33    |
| 1275 |        |        |                         | 0.37    | 0.49    | 0.36    | 0.27    |
| 1276 |        |        |                         | 0.38    | 0.01    | 0.02    | 0.01    |
| 1277 |        |        |                         | 0.47    | 0.28    | 0.36    | 0.37    |
| 1278 |        |        |                         | 0.30    | 0.36    | 0.17    | 0.14    |
| 1279 |        |        |                         | 0.22    | 0.46    | 0.50    | 0.34    |
| 1280 |        |        |                         | 0.07    | 0.00    | 0.22    | 0.17    |
| 1281 |        |        |                         | 0.26    | 0.26    | 0.22    | 0.17    |
| 1282 |        |        |                         | 0.30    | 0.12    | 0.27    | 0.19    |
| 1283 |        |        |                         | 0.13    | 0.00    | 0.34    | 0.33    |
| 1284 |        |        |                         | 0.27    | 0.18    | 0.01    | 0.00    |
| 1285 |        |        |                         | 0.41    | 0.49    | 0.01    | 0.00    |
| 1286 |        |        |                         | 0.30    | 0.13    | 0.47    | 0.44    |
| 1287 |        |        |                         | 0.16    | 0.03    | 0.13    | 0.17    |
| 1288 |        |        |                         | 0.39    | 0.42    | 0.41    | 0.49    |
| 1289 |        |        |                         | 0.40    | 0.38    | 0.42    | 0.49    |
| 1290 |        |        |                         | 0.08    | 0.08    | 0.21    | 0.14    |
| 1291 |        |        |                         | 0.43    | 0.13    | 0.38    | 0.48    |
| 1292 |        |        |                         | 0.37    | 0.31    | 0.15    | 0.33    |
| 1293 |        |        |                         | 0.40    | 0.44    | 0.40    | 0.48    |
| 1294 |        |        |                         | 0.23    | 0.01    | 0.02    | 0.02    |
| 1295 |        |        |                         | 0.28    | 0.10    | 0.19    | 0.38    |
| 1296 |        |        |                         | 0.48    | 0.46    | 0.22    | 0.43    |
| 1297 |        |        |                         | 0.45    | 0.48    | 0.38    | 0.47    |
| 1298 |        |        |                         | 0.40    | 0.35    | 0.40    | 0.46    |
| 1299 |        |        |                         | 0.33    | 0.41    | 0.24    | 0.15    |
| 1300 |        | Y      |                         | 0.12    | 0.13    | 0.19    | 0.13    |
| 1301 |        |        |                         | 0.31    | 0.00    | 0.00    | 0.00    |
| 1302 |        |        |                         | 0.38    | 0.38    | 0.21    | 0.14    |
| 1303 |        |        |                         | 0.31    | 0.06    | 0.16    | 0.09    |

Key appears on page 109.



Complete list of all 94 genes and 1,536 SNPs present on the COGS SNP Chip

|      | A        | B         | C          | D                                                              | E         | F     | G          | H             | I      | J         |
|------|----------|-----------|------------|----------------------------------------------------------------|-----------|-------|------------|---------------|--------|-----------|
| 1    | Cytoband | Gene Name | Gene Alias | Description                                                    | Size (kb) | Chrom | SNP ID     | Position (bp) | htSNP* | Coding    |
| 1304 | 12p13.1  | GRIN2B    | NMDAR2B    | glutamate receptor, ionotropic, N-methyl D-aspartate 2B        | 418.9     | 12    | rs7301328  | 13910044      |        | Pro122Pro |
| 1305 | 12p13.1  | GRIN2B    | NMDAR2B    | glutamate receptor, ionotropic, N-methyl D-aspartate 2B        | 418.9     | 12    | rs10845852 | 13918404      | G      |           |
| 1306 | 12p13.1  | GRIN2B    | NMDAR2B    | glutamate receptor, ionotropic, N-methyl D-aspartate 2B        | 418.9     | 12    | rs10772715 | 13929270      | G      |           |
| 1307 | 12p13.1  | GRIN2B    | NMDAR2B    | glutamate receptor, ionotropic, N-methyl D-aspartate 2B        | 418.9     | 12    | rs10492141 | 13936517      | G      |           |
| 1308 | 12p13.1  | GRIN2B    | NMDAR2B    | glutamate receptor, ionotropic, N-methyl D-aspartate 2B        | 418.9     | 12    | rs11055673 | 13945279      | G      |           |
| 1309 | 12p13.1  | GRIN2B    | NMDAR2B    | glutamate receptor, ionotropic, N-methyl D-aspartate 2B        | 418.9     | 12    | rs4764038  | 13953904      | G      |           |
| 1310 | 12p13.1  | GRIN2B    | NMDAR2B    | glutamate receptor, ionotropic, N-methyl D-aspartate 2B        | 418.9     | 12    | rs2216344  | 13961423      | G      |           |
| 1311 | 12p13.1  | GRIN2B    | NMDAR2B    | glutamate receptor, ionotropic, N-methyl D-aspartate 2B        | 418.9     | 12    | rs2160729  | 13963111      | G      |           |
| 1312 | 12p13.1  | GRIN2B    | NMDAR2B    | glutamate receptor, ionotropic, N-methyl D-aspartate 2B        | 418.9     | 12    | rs219891   | 13977415      | G      |           |
| 1313 | 12p13.1  | GRIN2B    | NMDAR2B    | glutamate receptor, ionotropic, N-methyl D-aspartate 2B        | 418.9     | 12    | rs219904   | 13984155      | G      |           |
| 1314 | 12p13.1  | GRIN2B    | NMDAR2B    | glutamate receptor, ionotropic, N-methyl D-aspartate 2B        | 418.9     | 12    | rs219912   | 13986655      | G      |           |
| 1315 | 12p13.1  | GRIN2B    | NMDAR2B    | glutamate receptor, ionotropic, N-methyl D-aspartate 2B        | 418.9     | 12    | rs219934   | 14004982      | G      |           |
| 1316 | 12p13.1  | GRIN2B    | NMDAR2B    | glutamate receptor, ionotropic, N-methyl D-aspartate 2B        | 418.9     | 12    | rs12829455 | 14005924      | G      |           |
| 1317 | 12p13.1  | GRIN2B    | NMDAR2B    | glutamate receptor, ionotropic, N-methyl D-aspartate 2B        | 418.9     | 12    | rs1895056  | 14029302      | G      |           |
| 1318 | 12q13.2  | BLOC1S1   | BLOS1      | biogenesis of lysosome-related organelles complex-1, subunit 1 | 3.7       | 12    | rs4457792  | 54396053      | T      |           |
| 1319 | 12q13.2  | BLOC1S1   | BLOS1      | biogenesis of lysosome-related organelles complex-1, subunit 1 | 3.7       | 12    | rs941022   | 54397591      | T      |           |
| 1320 | 12q13.2  | BLOC1S1   | BLOS1      | biogenesis of lysosome-related organelles complex-1, subunit 1 | 3.7       | 12    | rs3138136  | 54403837      | T      |           |
| 1321 | 12q22    | EEA1      |            | early endosome antigen 1                                       | 153.9     | 12    | rs10507017 | 91689067      | T      |           |
| 1322 | 12q22    | EEA1      |            | early endosome antigen 1                                       | 153.9     | 12    | rs10507018 | 91699244      | T      |           |
| 1323 | 12q22    | EEA1      |            | early endosome antigen 1                                       | 153.9     | 12    | rs11106700 | 91713188      | T      |           |
| 1324 | 12q22    | EEA1      |            | early endosome antigen 1                                       | 153.9     | 12    | rs1995169  | 91769607      | T      |           |
| 1325 | 12q22    | EEA1      |            | early endosome antigen 1                                       | 153.9     | 12    | rs7965897  | 91783407      | T      |           |
| 1326 | 12q24.11 | DAO       | DAAO       | D-amino-acid oxidase                                           | 20.8      | 12    | rs2070587  | 107801872     | T      |           |
| 1327 | 12q24.11 | DAO       | DAAO       | D-amino-acid oxidase                                           | 20.8      | 12    | rs6539458  | 107804967     | T      |           |
| 1328 | 12q24.11 | DAO       | DAAO       | D-amino-acid oxidase                                           | 20.8      | 12    | rs3741775  | 107807732     | T      |           |
| 1329 | 12q24.11 | DAO       | DAAO       | D-amino-acid oxidase                                           | 20.8      | 12    | rs11830725 | 107811857     | T      |           |
| 1330 | 12q24.11 | DAO       | DAAO       | D-amino-acid oxidase                                           | 20.8      | 12    | rs3918347  | 107817449     | T      |           |
| 1331 | 13q14.2  | HTR2A     | 5-HT2A     | 5-hydroxytryptamine (serotonin)receptor 2A                     | 62.7      | 13    | rs7333412  | 46301361      | T      |           |
| 1332 | 13q14.2  | HTR2A     | 5-HT2A     | 5-hydroxytryptamine (serotonin)receptor 2A                     | 62.7      | 13    | rs3125     | 46306852      | T      |           |
| 1333 | 13q14.2  | HTR2A     | 5-HT2A     | 5-hydroxytryptamine (serotonin)receptor 2A                     | 62.7      | 13    | rs977003   | 46313002      | T      |           |
| 1334 | 13q14.2  | HTR2A     | 5-HT2A     | 5-hydroxytryptamine (serotonin)receptor 2A                     | 62.7      | 13    | rs1923886  | 46321292      | T      |           |
| 1335 | 13q14.2  | HTR2A     | 5-HT2A     | 5-hydroxytryptamine (serotonin)receptor 2A                     | 62.7      | 13    | rs2296972  | 46326472      | T      |           |
| 1336 | 13q14.2  | HTR2A     | 5-HT2A     | 5-hydroxytryptamine (serotonin)receptor 2A                     | 62.7      | 13    | rs9316233  | 46331356      | T      |           |
| 1337 | 13q14.2  | HTR2A     | 5-HT2A     | 5-hydroxytryptamine (serotonin)receptor 2A                     | 62.7      | 13    | rs659734   | 46333284      | T      |           |
| 1338 | 13q14.2  | HTR2A     | 5-HT2A     | 5-hydroxytryptamine (serotonin)receptor 2A                     | 62.7      | 13    | rs1928042  | 46335217      | T      |           |
| 1339 | 13q14.2  | HTR2A     | 5-HT2A     | 5-hydroxytryptamine (serotonin)receptor 2A                     | 62.7      | 13    | rs582385   | 46343995      | T      |           |
| 1340 | 13q14.2  | HTR2A     | 5-HT2A     | 5-hydroxytryptamine (serotonin)receptor 2A                     | 62.7      | 13    | rs985933   | 46353864      | T      |           |
| 1341 | 13q14.2  | HTR2A     | 5-HT2A     | 5-hydroxytryptamine (serotonin)receptor 2A                     | 62.7      | 13    | rs9534505  | 46358745      | T      |           |
| 1342 | 13q14.2  | HTR2A     | 5-HT2A     | 5-hydroxytryptamine (serotonin)receptor 2A                     | 62.7      | 13    | rs2070036  | 46364951      | T      |           |
| 1343 | 13q14.2  | HTR2A     | 5-HT2A     | 5-hydroxytryptamine (serotonin)receptor 2A                     | 62.7      | 13    | rs2070037  | 46365071      | T      |           |
| 1344 | 13q14.2  | HTR2A     | 5-HT2A     | 5-hydroxytryptamine (serotonin)receptor 2A                     | 62.7      | 13    | rs6313     | 46367941      |        | Ser34Ser  |
| 1345 | 13q14.2  | HTR2A     | 5-HT2A     | 5-hydroxytryptamine (serotonin)receptor 2A                     | 62.7      | 13    | rs1328685  | 46369891      | T      |           |

Key appears on page 109.

|      | K      | L      | M                                                                                              | N       | O       | P       | Q       |
|------|--------|--------|------------------------------------------------------------------------------------------------|---------|---------|---------|---------|
| 1    | Prom** | TFBS** | Association (reference)                                                                        | MAF_CEU | MAF_YRI | MAF_JPT | MAF_HCB |
| 1304 |        |        | p=0.020 (Ohtsuki et al. 2001)                                                                  | 0.29    | 0.44    |         | 0.49    |
| 1305 |        |        |                                                                                                | 0.13    | 0.33    | 0.15    | 0.09    |
| 1306 |        |        |                                                                                                | 0.35    | 0.17    | 0.34    | 0.46    |
| 1307 |        | Y      |                                                                                                | 0.28    | 0.13    | 0.19    | 0.14    |
| 1308 |        |        |                                                                                                | 0.18    | 0.00    | 0.23    | 0.17    |
| 1309 |        |        |                                                                                                | 0.33    | 0.24    | 0.01    | 0.00    |
| 1310 |        |        |                                                                                                | 0.44    | 0.49    | 0.47    | 0.41    |
| 1311 |        |        |                                                                                                | 0.37    | 0.23    | 0.01    | 0.04    |
| 1312 |        |        |                                                                                                | 0.07    | 0.17    | 0.11    | 0.03    |
| 1313 |        |        |                                                                                                | 0.48    | 0.48    | 0.50    | 0.37    |
| 1314 |        |        |                                                                                                | 0.41    | 0.33    | 0.05    | 0.06    |
| 1315 |        |        |                                                                                                | 0.48    | 0.47    | 0.47    | 0.41    |
| 1316 |        |        |                                                                                                | 0.45    | 0.24    | 0.06    | 0.06    |
| 1317 |        |        |                                                                                                | 0.26    | 0.00    | 0.00    | 0.01    |
| 1318 | Y      |        |                                                                                                | 0.04    | 0.38    | 0.01    | 0.03    |
| 1319 |        |        |                                                                                                | 0.45    | 0.11    | 0.06    | 0.09    |
| 1320 |        |        |                                                                                                | 0.08    | 0.02    | 0.00    | 0.00    |
| 1321 |        |        |                                                                                                | 0.12    | 0.11    | 0.00    | 0.01    |
| 1322 |        |        |                                                                                                | 0.13    | 0.01    | 0.00    | 0.02    |
| 1323 |        |        |                                                                                                | 0.38    | 0.18    | 0.03    | 0.08    |
| 1324 |        |        |                                                                                                | 0.03    | 0.08    | 0.00    | 0.00    |
| 1325 |        |        |                                                                                                | 0.02    | 0.12    | 0.01    | 0.00    |
| 1326 |        |        | haplotype (Liu et al. 2004)                                                                    | 0.18    | 0.38    | 0.32    | 0.31    |
| 1327 |        |        |                                                                                                | 0.04    | 0.03    | 0.00    | 0.00    |
| 1328 |        |        | p=0.000001 (Liu et al. 2004), p=0.021 (Schumacher et al. 2004), p=0.048 (Stefanis et al. 2007) | 0.37    | 0.00    | 0.33    | 0.43    |
| 1329 |        |        |                                                                                                | 0.07    | 0.43    | 0.00    | 0.00    |
| 1330 |        |        |                                                                                                | 0.31    | 0.38    | 0.36    | 0.43    |
| 1331 |        |        | p=0.025 (Dominguez et al. 2007)                                                                | 0.18    | 0.48    | 0.21    | 0.12    |
| 1332 |        |        |                                                                                                | 0.11    | 0.05    | 0.21    | 0.12    |
| 1333 |        |        |                                                                                                | 0.45    | 0.15    | 0.25    | 0.13    |
| 1334 |        |        |                                                                                                | 0.45    | 0.03    | 0.41    | 0.48    |
| 1335 |        |        | p=0.023 (Dominguez et al. 2007)                                                                | 0.29    | 0.23    | 0.49    | 0.48    |
| 1336 |        |        |                                                                                                | 0.21    | 0.42    | 0.34    | 0.27    |
| 1337 |        |        | p=0.034 (Dominguez et al. 2007)                                                                | 0.07    | 0.18    | 0.00    | 0.00    |
| 1338 |        |        |                                                                                                | 0.24    | 0.33    | 0.05    | 0.08    |
| 1339 |        |        |                                                                                                | 0.18    | 0.20    | 0.01    | 0.02    |
| 1340 |        |        |                                                                                                | 0.36    | 0.48    | 0.43    | 0.42    |
| 1341 |        |        |                                                                                                | 0.11    | 0.24    | 0.03    | 0.09    |
| 1342 |        |        |                                                                                                | 0.03    | 0.01    | 0.33    | 0.24    |
| 1343 |        |        |                                                                                                | 0.19    | 0.02    | 0.44    | 0.41    |
| 1344 |        |        | p<0.001 (Baritaki et al. 2004), p=0.020 Golimbet et al. 2007)                                  | 0.45    | 0.35    |         | 0.48    |
| 1345 |        |        |                                                                                                | 0.13    | 0.33    | 0.07    | 0.08    |

Key appears on page 109.

|      | R                                                                                                                              |
|------|--------------------------------------------------------------------------------------------------------------------------------|
| 1    | Sequence                                                                                                                       |
| 1304 | GCAGCCCCCTTTTACCTTATCTGCCATTATCATAGAGGAGCCCCCGTGGATGCCCAGGAT[C/G]GGGGTGAGAGTCTGTGCTGAAATGAAATCGAGGATCTGGGCGATGGCTTCTGGTCTGTG   |
| 1305 | AGCAATATTTCTGCTACATCTTTCTGGAACCTCTCCCAGTAAGAGCCTTCTCATTCTT[A/C]GTTCAACCAGACCTGTACCTGGGCTCCTTCTTGCCTTACAGCACTTCCAGTGGCTCAA      |
| 1306 | AACCTCCAAAGAGGTTATAGCTATTCGTGTAGAAGATAATCAGGCCATAAAAAATGCT[A/G]CAGACAAGATAATAGATTTGAAACTGATGAGGGGTAACACACAGTAAGATGTAAAAAAG     |
| 1307 | ATAATGACAGAAGGGAAGAAAAAACAGAAAGTCCCCTCTCCCAATGGCCGAGTTCTAAT[T/C]TGTATTTTATGCTTATATGTCAAATCCAATAAATGTCCTTACAGTTTTCCAGTCTTGGT    |
| 1308 | TAACTGAAGTTCTCTAAGATTCAAATTTAATAGATAACGCCAAACATTTTTTCAAATTG[A/G]GCCAATTAATTTCCACAAGCAGTGTAGAAGTATTCCTCTTCTACATTCTACCAACATT     |
| 1309 | CACTTGTCTTAAAAATGGGACAAAGACTAGAAAGACTCGGGAAGAAAAAGGATAAAGAAAG[T/G]GCCTTAAGGTGTGAAGGAATATCTAGCAGCAATAAAGGTAAATGTGACGAGGAAGTAAAT |
| 1310 | ACCAGTCCAAGCACATCATGTCCCTCTGGGTACATCCCATTAAAAACAAGGCTCCAAATG[A/G]GGTCCCCTAATAAAAACCCCATAAACCCTGCTAATCAAACCTGCTTATTTTACAAGCCCCA |
| 1311 | TGTCTTTTTGGAACAATTAGCTTGAAAGTCAGCTTTCTTTGTCTAGGATCCTTCTCAATC[T/C]TTCCACCCACTCAAACCTATTAGCAGTTCAACTAATTATTTTCACTTTCATGTATT      |
| 1312 | CCTGTTAGTCATCAGCTCATGCTAAGTCTCTTATTTCTTCCCACCACCTCTGCAAATAGT[A/C]CCTTAAACAACTCTTCAATTAACCCCTTTGAGTATGCCATTGTCTCCCTGCCAGCAC     |
| 1313 | CCACAGAAAGTACACAGAATACAAAAGTAAAGGGTTGAGTGTGCCTGTGCATTAGGTA[T/C]GGCATCAAGGCAGGAGCTGGGAAGTAACCACAGTGACCTGTAAACCTGTAAAGTGCAGGTC   |
| 1314 | GGCACTATTTGGGAAGCTAAGTTGTACAACGAATAATGTAATTAATGTAATTCATTCC[A/G]AATGTTAAGGGCTAGAATGTCTTCTCAAATTAATGAAAACCTCAATTCATTTGAAATAA     |
| 1315 | TTCCTGATGTCAGGGAAGACAGGAAGTATTGTGTGACAGCAAAGTCCGTAATGAAGAGAC[A/G]GATTGGGTGAGGACAAAGGCAGTTGTAGCTGTAAAGAACAAAACAAAGTCCCCTCTGAAG  |
| 1316 | AAAATCTAAGAGTAGTTATTTCCACAGCATGAGGAGCTGTGTGCATAAAATAGAGGGTT[A/G]AGAGCATTATTTAATCAACCCACCACATCTTCTAGAAACGTAGTCCAGCGGAATGGCA     |
| 1317 | TCAGCAAACGCAAAGCCTATGCCTTGCTGGCCAACAACAACAAAAAAGTATGTTATC[T/C]GGCAACATCTTTCAGATCAAACACGGTACCAAAGGCTGGAGCCTGAAGTTTATACAATTT     |
| 1318 | AACACTTACCTGCCCTCCGCAACCCTCTACCTCTTCCCCGCCAAGATCTTCACCCAA[C/G]GTCTCAAGAGGGCGGTTCCCAACCTCAGTGACACAGCGGTACGTGACATGGCCCCGGG       |
| 1319 | GGGTCACCTAGGGTCAAGAGACAATGTTCTTTGCTTTTTCCCAAGCTTTGGCTGTTACT[T/G]GCATTTCTATTTAGGGCTGGGGCAGGGTGTGGTCCCTAGAGACCCAATAGGAAGGTAAGA   |
| 1320 | TATAGGGAGGGGACTTTGAGGGACATGGGTTGGGGAGCTGAGAAAGTTACCACAGACCAG[A/G]GACAAGATTTTGACGGAGATGCCACTGCCCCGGGACAAGGGTCAAGTGGGGTAGAGGG    |
| 1321 | AATAATTATTATCATGGCAGGATATATACTATTAACACATTCAAGGAAGTCTTAG[A/G]GTCAGATTATTGCATCAAAGGGAAGTCCACAAACTTCCATTTCAGAATCGTACCTTTTGC       |
| 1322 | CACCATCACCACACCCACAGAATTTTTAAATTAATTTAGGAAGTGAACCATTTAGA[A/G]TTTACCAAGAATTTAGGGGAATATACACTGCAGAGTAAATATCCTGTGAGCTAACAGGAAT     |
| 1323 | TCCCTCAGAACCAATTTAACCATATTGGTCATCTGTTTTAGAAAATACCAACATCAAC[A/T]CAAATCTCTTTCAGCAAAGCTTCTTTGATCACCCCAACCTTTCAGTAGAATTATGTCCCATCA |
| 1324 | GTTTGCTCCAGGTTGGATGTAGTTAATTTATATATTTATTGAGAGCTAAATAAAGGAAAG[A/G]AAGTCAAGGACAGATCCAAGATTAAAGTCTTGGGAGAGTATTAGAGATGTATGGTTCC    |
| 1325 | AGTTTGGATATCTACAATGATAACAAGTTTTCTAGTCAGTAAATGTCCTTGCTAACCTAC[A/G]GCTAACACAGTAAAGGCCTAAAATTAATGTGTAGCCCCATAAAAATATAAAAAACAACAT  |
| 1326 | GGGCCACAGGCCCGAGTTGCCAGGAGCTGAGGTCTGCGGGAGGAGAGTTGTGAGTGAAGA[T/G]GAGGGAAAGTTGAATTTGGCTCTTCTGGGCACAAATAATTCTCTTGTCTGCCTCAGCAG   |
| 1327 | gagggtctaggaatgtaggtgagctgtgtcccagggggaggaggaaagttgtaggag[T/C]ggcaagtcgatgtctccacCAGTGTTTACAAGGAGGGGTGCTTGCAGCCAGACTGAACA      |
| 1328 | GGGGTCATACAGCTGTTGGAATCCCAGTTTGCCCACTGGCTGTGACCTTAGGAAG[T/G]CATTAGCCTCTGAAACTCAGTATCTTCACTACAAAACAATATGGTGATATGGAGCT           |
| 1329 | TCTGCTTCCCTTCTGACTTCTTTGGGAGGTTCCAGGAAGATTTCCCCATCCAAAGAAGC[T/C]GTTTTACAACCCTTTTATATTCAGAGTTGTGCAGGAGCCTCATAACAGCCTATGAACAG    |
| 1330 | CCATGGCAAGGAAAGTAATGCCCTCTTCCACTCCTCAGATGGCTCTGGCATTTCAGGGA[A/G]CAGTCATGTCTGATCTCAAGTTCACACAGGCTCCATAGCAGGCAGGGGCAGTGGTGGCT    |
| 1331 | TCCCATATAAAAGATAAAGTTGTCATTTATTTGAAATCCATCTAGAGAATTTAAGAAAAC[A/G]TGAGGGTCTGCATTCCAGATTATCCTTGGCACCTGAAGCAGTGCCTTGGTTCAACAAGG   |
| 1332 | AAAAAAAATATGAGATTGGAAAAATTAGACAAGTCTAGTGAACCAACGATCATATCT[C/G]TATGCCTCATTTTATTCTGTCAATGAAAAGCGGGGTTCAATGCTACAAAATGTGTGCTTG     |
| 1333 | ACAATTCAAGATGAGATTTGGGTGGAGACACAGAATGAAACCATATCAATGGTGAATTT[G]AGTGCTTATTAGTCATATTAGGGGCTAGAATTTTTCTGCCATCTAAGGAAAGATCTATC      |
| 1334 | CACTCGCTCACCCCCACCTTTCCTTATCCCAGTAAATGGTCTACCATCTATCCAGATA[T/C]ACAGCTTAAAAACTTAGGAGTCTCTTCCATTATCTGCCTTTGCAAAAAGACTCACCAGC     |
| 1335 | CTAAGGTGTGGTAGCTGAGGAACACCTAAGCTTGTGCTATTTGTAATGCTGCTTATTAGA[T/G]ACATCGCTGATCCTCCTGTCAACTCCAGTTAATGTTTCTGTCCCATTCAAGTTGAAAATG  |
| 1336 | CCCAAATAATCAGATATCTAAAATCTTGTGTTGAAGAGAAGTACCTATAATTTGCCAAG[C/G]CTTCAAGATGCTATCACATGGCTGATTCTCTCATTCTCAAGTTTTCAGCTGAGATGAAA    |
| 1337 | TTCTTGCTCTGAGCTTTTCTCCTCATTCCCCTCTGAATCTAGCTGCTTCCGTTTATGA[T/C]TTCAGTTCAATTTCTACCAGCTATTATGAGATAACTAGGACCTTTTAAAGAATAAATTT     |
| 1338 | TCACCTATTTGACTAATTTGACTAATTTGAGAAAATAAGTCTGAATTAAGAGTCA[A/C]JAATTCAGTTTTATTTTCAGAGAAATTTTATTCTCCAATGCACATGGTAACTAGTGTATA       |
| 1339 | AGGATATGTCTAGAATTAATTTACATTTTGATAATTTTCCAGCTCTATAATTCATTT[T/C]CTACTGTTGGGTTTCAACACCTAAAATTTGTCAGCAAGCCTCTGAACAAAGATGCTTTTGT    |
| 1340 | CTGAGGAATCCACTTGAGATTGTCTCTCTGGGACCCTCCAGGTTTATGCCAACTCCTT[T/C]ATACGGCTATTAGTCAGCCTAAGAAGTACATGTCAGAGACTATTCAGGCAACCAGGACAG    |
| 1341 | AAGGTGAGAAAAATAGCCTGGGGAGAGTCAAAACAAAAAGATAGAGTAATATTAGTACCAC[A/G]TAAAGCAGAATTCAGGTCCCAAACCTGTCTTGGGGTCCAGGGAGAGAAAAAGCAATTGG  |
| 1342 | ACTATGATAAGCTAGCACTGGCTGATGAATGCAGGGTTTAAAAATTTCTAGTGTCTGGAG[T/G]TATGTGAGTGTGGCACGGTAAGCTTGGATGGTCTCTATTTGGGGGTTCTTTCTTCCCC    |
| 1343 | CCTTACGCCTGGCAAAACATTTCTTTTGTAAATGGCTTATGTCAAAATTTGTGTTTTGGC[T/C]CCTCTTCTGGAGCACCTCTCACACTGTACTGTGAGGATTTAGTCACATATTTCTCTGGAT  |
| 1344 | TACGAACTCCCTAATGCAATTAATGATGACACCAGGCTCTACAGTAATGACTTTAACTC[T/C]GGAGAAGCTAACACTTCTGATGCATTTAACTGGACAGTCGACTCTGAAAATCGAACCAAC   |
| 1345 | TTTCTCAATAGTTGGGTTTTGCTACAGTTCTATCACCTTCTGTTCTTACATTCTCCCT[A/G]GACAAATTAACCACTCTCATGCCTTCAATATGTTTGTGGCCAAGTGTACCTTCATAG       |



|      | A        | B         | C          | D                                                       | E         | F     | G          | H             | I      | J        |
|------|----------|-----------|------------|---------------------------------------------------------|-----------|-------|------------|---------------|--------|----------|
| 1    | Cytoband | Gene Name | Gene Alias | Description                                             | Size (kb) | Chrom | SNP ID     | Position (bp) | htSNP* | Coding   |
| 1346 | 13q14.2  | HTR2A     | 5-HT2A     | 5-hydroxytryptamine (serotonin)receptor 2A              | 62.7      | 13    | rs4142900  | 46371551      | T      |          |
| 1347 | 13q33.2  | DAOA      | G72        | D-amino oxidase activator                               | 24.8      | 13    | rs1341402  | 104913510     |        |          |
| 1348 | 13q33.2  | DAOA      | G72        | D-amino oxidase activator                               | 24.8      | 13    | rs1341403  | 104914808     | T      |          |
| 1349 | 13q33.2  | DAOA      | G72        | D-amino oxidase activator                               | 24.8      | 13    | rs2391191  | 104917447     |        | Arg30Lys |
| 1350 | 13q33.2  | DAOA      | G72        | D-amino oxidase activator                               | 24.8      | 13    | rs1539070  | 104922458     | T      |          |
| 1351 | 13q33.2  | DAOA      | G72        | D-amino oxidase activator                               | 24.8      | 13    | rs3916968  | 104925530     | T      |          |
| 1352 | 13q33.2  | DAOA      | G72        | D-amino oxidase activator                               | 24.8      | 13    | rs701567   | 104939996     | T      |          |
| 1353 | 13q33.2  | DAOA      | G72        | D-amino oxidase activator                               | 24.8      | 13    | rs778294   | 104940236     | T      |          |
| 1354 | 14q32.33 | AKT1      | PKB        | v-akt murine thymoma viral oncogene homolog 1           | 26.4      | 14    | rs2498804  | 104304140     | T      |          |
| 1355 | 14q32.33 | AKT1      | PKB        | v-akt murine thymoma viral oncogene homolog 1           | 26.4      | 14    | rs2494732  | 104310237     |        |          |
| 1356 | 14q32.33 | AKT1      | PKB        | v-akt murine thymoma viral oncogene homolog 1           | 26.4      | 14    | rs2494738  | 104317731     | T      |          |
| 1357 | 14q32.33 | AKT1      | PKB        | v-akt murine thymoma viral oncogene homolog 1           | 26.4      | 14    | rs2494743  | 104322765     | T      |          |
| 1358 | 14q32.33 | AKT1      | PKB        | v-akt murine thymoma viral oncogene homolog 1           | 26.4      | 14    | rs1130214  | 104330779     | T      |          |
| 1359 | 15q13.3  | CHRNA7    |            | cholinergic receptor, nicotinic, alpha 7                | 138.5     | 15    | rs3087454  | 30108259      |        |          |
| 1360 | 15q13.3  | CHRNA7    |            | cholinergic receptor, nicotinic, alpha 7                | 138.5     | 15    | rs6494165  | 30108578      |        |          |
| 1361 | 15q13.3  | CHRNA7    |            | cholinergic receptor, nicotinic, alpha 7                | 138.5     | 15    | rs3826029  | 30108777      |        |          |
| 1362 | 15q13.3  | CHRNA7    |            | cholinergic receptor, nicotinic, alpha 7                | 138.5     | 15    | rs885071   | 30111868      |        |          |
| 1363 | 15q13.3  | CHRNA7    |            | cholinergic receptor, nicotinic, alpha 7                | 138.5     | 15    | rs883473   | 30112968      |        |          |
| 1364 | 15q13.3  | CHRNA7    |            | cholinergic receptor, nicotinic, alpha 7                | 138.5     | 15    | rs8037484  | 30134166      |        |          |
| 1365 | 15q13.3  | CHRNA7    |            | cholinergic receptor, nicotinic, alpha 7                | 138.5     | 15    | rs4779970  | 30137170      |        |          |
| 1366 | 15q13.3  | CHRNA7    |            | cholinergic receptor, nicotinic, alpha 7                | 138.5     | 15    | rs12593470 | 30148531      |        |          |
| 1367 | 15q13.3  | CHRNA7    |            | cholinergic receptor, nicotinic, alpha 7                | 138.5     | 15    | rs982574   | 30161315      |        |          |
| 1368 | 15q13.3  | CHRNA7    |            | cholinergic receptor, nicotinic, alpha 7                | 138.5     | 15    | rs12914788 | 30163729      |        |          |
| 1369 | 15q13.3  | CHRNA7    |            | cholinergic receptor, nicotinic, alpha 7                | 138.5     | 15    | rs2133965  | 30171846      |        |          |
| 1370 | 15q13.3  | CHRNA7    |            | cholinergic receptor, nicotinic, alpha 7                | 138.5     | 15    | rs8035668  | 30178638      |        |          |
| 1371 | 15q13.3  | CHRNA7    |            | cholinergic receptor, nicotinic, alpha 7                | 138.5     | 15    | rs9788657  | 30182318      |        |          |
| 1372 | 15q13.3  | CHRNA7    |            | cholinergic receptor, nicotinic, alpha 7                | 138.5     | 15    | rs8028396  | 30184013      |        |          |
| 1373 | 15q13.3  | CHRNA7    |            | cholinergic receptor, nicotinic, alpha 7                | 138.5     | 15    | rs10438342 | 30189338      |        |          |
| 1374 | 15q13.3  | CHRNA7    |            | cholinergic receptor, nicotinic, alpha 7                | 138.5     | 15    | rs11858834 | 30190213      |        |          |
| 1375 | 15q13.3  | CHRNA7    |            | cholinergic receptor, nicotinic, alpha 7                | 138.5     | 15    | rs12915695 | 30190637      |        |          |
| 1376 | 15q13.3  | CHRNA7    |            | cholinergic receptor, nicotinic, alpha 7                | 138.5     | 15    | rs16956223 | 30198075      |        |          |
| 1377 | 15q13.3  | CHRNA7    |            | cholinergic receptor, nicotinic, alpha 7                | 138.5     | 15    | rs7170028  | 30212293      |        |          |
| 1378 | 15q13.3  | CHRNA7    |            | cholinergic receptor, nicotinic, alpha 7                | 138.5     | 15    | rs1909884  | 30226590      |        |          |
| 1379 | 15q13.3  | CHRNA7    |            | cholinergic receptor, nicotinic, alpha 7                | 138.5     | 15    | rs2337980  | 30231488      |        |          |
| 1380 | 16p13.2  | GRIN2A    | NMDAR2A    | glutamate receptor, ionotropic, N-methyl D-aspartate 2A | 421.2     | 16    | rs2267770  | 9773460       | T      |          |
| 1381 | 16p13.2  | GRIN2A    | NMDAR2A    | glutamate receptor, ionotropic, N-methyl D-aspartate 2A | 421.2     | 16    | rs10492827 | 9776259       | T      |          |
| 1382 | 16p13.2  | GRIN2A    | NMDAR2A    | glutamate receptor, ionotropic, N-methyl D-aspartate 2A | 421.2     | 16    | rs9933832  | 9856135       | T      |          |
| 1383 | 16p13.2  | GRIN2A    | NMDAR2A    | glutamate receptor, ionotropic, N-methyl D-aspartate 2A | 421.2     | 16    | rs2267795  | 9878376       | T      |          |
| 1384 | 16p13.2  | GRIN2A    | NMDAR2A    | glutamate receptor, ionotropic, N-methyl D-aspartate 2A | 421.2     | 16    | rs968301   | 9881867       | T      |          |
| 1385 | 16p13.2  | GRIN2A    | NMDAR2A    | glutamate receptor, ionotropic, N-methyl D-aspartate 2A | 421.2     | 16    | rs7189130  | 9886053       | T      |          |
| 1386 | 16p13.2  | GRIN2A    | NMDAR2A    | glutamate receptor, ionotropic, N-methyl D-aspartate 2A | 421.2     | 16    | rs9938172  | 9909920       | T      |          |
| 1387 | 16p13.2  | GRIN2A    | NMDAR2A    | glutamate receptor, ionotropic, N-methyl D-aspartate 2A | 421.2     | 16    | rs4782039  | 9914468       | T      |          |

Key appears on page 109.

Complete list of all 94 genes and 1,536 SNPs present on the COGS SNP Chip

|      | K      | L      | M                                                                                                                                                          | N       | O       | P       | Q       |
|------|--------|--------|------------------------------------------------------------------------------------------------------------------------------------------------------------|---------|---------|---------|---------|
| 1    | Prom** | TFBS** | Association (reference)                                                                                                                                    | MAF_CEU | MAF_YRI | MAF_JPT | MAF_HCB |
| 1346 |        |        |                                                                                                                                                            | 0.43    | 0.32    | 0.16    | 0.28    |
| 1347 |        |        | p=0.008 (Hattori et al. 2003), p=0.048 (Schumacher et al. 2004)                                                                                            | 0.36    | 0.00    |         | 0.00    |
| 1348 |        |        |                                                                                                                                                            | 0.34    | 0.30    | 0.30    | 0.50    |
| 1349 |        |        | p=0.032 (Chumakov et al. 2002), p=0.031 (Addington et al. 2004), p=0.037 (Schumacher et al. 2004), p=0.045 (Hall et al. 2004), haplotype (Yue et al. 2007) | 0.34    | 0.08    | 0.31    | 0.48    |
| 1350 |        |        |                                                                                                                                                            | 0.15    | 0.28    | 0.00    | 0.00    |
| 1351 |        |        |                                                                                                                                                            | 0.22    | 0.32    | 0.17    | 0.23    |
| 1352 |        |        |                                                                                                                                                            | 0.49    | 0.25    | 0.39    | 0.40    |
| 1353 |        |        | p=0.018 (Hattori et al. 2003), p=0.025 (Ma et al. 2006), haplotype (Korostishevsky et al. 2006; Yue et al. 2007)                                           | 0.40    | 0.23    | 0.15    | 0.11    |
| 1354 |        |        |                                                                                                                                                            | 0.33    | 0.21    | 0.40    | 0.39    |
| 1355 |        |        | p=0.004 (Ikeda et al. 2004), haplotype (Bajestan et al. 2006)                                                                                              | 0.39    | 0.48    |         |         |
| 1356 |        |        |                                                                                                                                                            | 0.11    | 0.06    | 0.40    | 0.41    |
| 1357 |        |        |                                                                                                                                                            | 0.09    | 0.50    | 0.34    | 0.26    |
| 1358 |        |        | p=0.011 (Schwab et al. 2005)                                                                                                                               | 0.28    | 0.41    | 0.07    | 0.10    |
| 1359 |        |        | p=0.0009 Stephens et al. 2009                                                                                                                              |         |         |         |         |
| 1360 |        |        |                                                                                                                                                            | 0.06    | 0.03    | 0.09    | 0.21    |
| 1361 |        |        |                                                                                                                                                            |         |         |         |         |
| 1362 |        |        |                                                                                                                                                            | 0.19    | 0.43    |         | 0.38    |
| 1363 |        |        |                                                                                                                                                            | 0.30    | 0.22    | 0.11    | 0.14    |
| 1364 |        |        |                                                                                                                                                            | 0.25    | 0.13    |         |         |
| 1365 |        |        |                                                                                                                                                            | 0.06    | 0.31    |         |         |
| 1366 |        |        |                                                                                                                                                            | 0.04    | 0.01    |         | 0.02    |
| 1367 |        |        |                                                                                                                                                            | 0.10    | 0.48    | 0.17    | 0.23    |
| 1368 |        |        |                                                                                                                                                            | 0.10    | 0.18    |         | 0.23    |
| 1369 |        |        |                                                                                                                                                            | 0.06    | 0.48    | 0.17    | 0.23    |
| 1370 |        |        |                                                                                                                                                            | 0.18    | 0.30    | 0.05    | 0.06    |
| 1371 |        |        |                                                                                                                                                            | 0.17    | 0.26    |         | 0.06    |
| 1372 |        |        |                                                                                                                                                            | 0.43    | 0.18    |         | 0.43    |
| 1373 |        |        |                                                                                                                                                            | 0.30    | 0.28    | 0.05    | 0.08    |
| 1374 |        |        |                                                                                                                                                            | 0.18    | 0.10    |         | 0.04    |
| 1375 |        |        |                                                                                                                                                            | 0.30    | 0.02    |         | 0.08    |
| 1376 |        |        |                                                                                                                                                            | 0.16    | 0.02    |         | 0.03    |
| 1377 |        |        |                                                                                                                                                            | 0.48    | 0.31    |         | 0.29    |
| 1378 |        |        |                                                                                                                                                            | 0.32    | 0.47    | 0.18    | 0.31    |
| 1379 |        |        |                                                                                                                                                            | 0.43    | 0.45    | 0.17    | 0.26    |
| 1380 |        |        |                                                                                                                                                            | 0.42    | 0.39    | 0.15    | 0.18    |
| 1381 |        |        |                                                                                                                                                            | 0.23    | 0.01    | 0.00    | 0.00    |
| 1382 |        |        |                                                                                                                                                            | 0.29    | 0.39    | 0.11    | 0.08    |
| 1383 |        |        |                                                                                                                                                            | 0.26    | 0.38    | 0.10    | 0.11    |
| 1384 |        |        |                                                                                                                                                            | 0.34    | 0.04    | 0.49    | 0.31    |
| 1385 |        |        |                                                                                                                                                            | 0.21    | 0.38    | 0.06    | 0.04    |
| 1386 |        |        |                                                                                                                                                            | 0.32    | 0.44    | 0.06    | 0.04    |
| 1387 |        |        |                                                                                                                                                            | 0.24    |         | 0.05    | 0.01    |

Key appears on page 109.

|      | R                                                                                                                               |
|------|---------------------------------------------------------------------------------------------------------------------------------|
| 1    | Sequence                                                                                                                        |
| 1346 | ATTAAGATGAATTGATTATTA AAAAGGAGAACCAGGGAGAACTTAGAACCTCTCATTTT[G]TCTTGTACTTTGTTTATTGGGATACCAATTTAATTTTATTAAGATAGCAGAGGGAAAT       |
| 1347 | CACACACACACACATCTTCAACATTTGTTAACATTAACATTCATTTTCTGTTA[T/C]GCATGTGTATATGTGCTTTTATTTAATAATGTTAGTTAACATTTCTTTTTCTGTAAATA           |
| 1348 | GTGAGATCCCTGAGAAAGGAGACTTTGTTGTTTGTCCACAGTGCCTCAGTGTG[A/C]AATAGCACCTGGTAAATCATAGGACTTCTGAAATACTTTCTGAATGGATAAATGAGTGG           |
| 1349 | TTTTCTTAATTTTAGATCCAGATATACATTTGGGTA AAAATCTACTTCATAGGTTTCAA[A/G]GAGCATTCTCTGAGCAAATCTGAAAACCTCTCTAAACTCTATTGGTATGTTACTCTTTAT   |
| 1350 | TACCTTGTGGTCAACACCGGAGGAAAGGCCCTTGACAGGGAAAAGGAATCTTCCCAACA[C/G]TCACACAGGGAAGGGACGAGAGGACTATTTTCATCGTGAGGTTTGGAGCTTTGGAAAGGCT   |
| 1351 | GCATTCATGGATCCAATTACGTTTTTGTGCATGGTAAAAGCCACAGTGGATATATTAAT[A/G]AGAGTGTGGTTAAGAATGAAGGCCAGGAGTCTGGAGATCTGGTTTTCTAAGGCTGACTT     |
| 1352 | CACAACATACATATTTGGATATAATTTCAAAGAAAGACTGTGAAAAAGCATAAAGAATTGT[A/G]GGAATTGCCTGAGAATTGAGGACGTTTCATCTGCAATGCCTGTAAAGGCTTACATTAACAA |
| 1353 | TCTTGCCATGAAGACTTTTCCAACATGGCTGCTTACTTCTCAAGCCTGTAAGGAGATCC[A/G]GTCTCAGTTGGCCAGGCTTGTGAAAGGTAACCTCATCACCGGAGTCAAGTGTATCACC      |
| 1354 | CATCATGCTCTTTCCAGCACAAAGGCCGGCCTGGAAGGGAGGAAGATAATAAAAGTGACTT[T/G]AGCACTTAGACCTCCCATGTTTCAGCAGGTGTGGTA AACTGAAGGCTCTGCAGTCTCTG  |
| 1355 | AGGACCGCTGGYGSAGGGCAGGTGCAGCCTGGGGATGAGGGGATGGAGGTGTAGCCTG[T/C]AGCTGGGATGGGCGGCCCTCACCTCTGCTTGGGGTCTTCTTGAGCAGCCCTGAAAGCAA      |
| 1356 | CTGGGTGTGCCAGGACAGATGTGCCTGGGATGCCTGAGTCCAGGGGGCAGGCGGGTAC[A/G]GGAGCTGTTTCTTAGGGCCAGCGACAGAAACGGCCCTGGGTCAACGGGAAGGCAGACTCG     |
| 1357 | CAACCAGGCTGGGGTGGGGCAGGGGAGGGGCCACACAACGGAGGCCAGCTGACCCACT[T/C]GGCTGGAGCCCCAGGTCTGTGGGTGAAATACATCCACTGCTCTCCGGCACAAGCCCT        |
| 1358 | CAGACCGGCAGGGGCGCTGTGGTTAGGAGGGGCTGGGGTTTCTCCAGGAGGTTTTG[T/G]GCTTGCCTGGAGGGCTCTGGACTCCCGTTTGCGCCAGTGGCCTGCATCCTGGTCTGTCT        |
| 1359 | CTAAGAGCCCTGTCTTCCCTTCTAGAAGAGCATGAGCCCATGGGGCAAGGGAATTTATTT[G]ATTTTTCTGGAGTATGGCTATCAGGATCACATTCCTGAAACCAGA AACTGCTTCTTTACC    |
| 1360 | TGTCCGGACTGCTAGAAGTGGTAGGGGACTCAAGAGCCAGATGAAGCTAAGGGCACGCC[T/G]GTCTGCTCTCCAGGGACCCCTGGCGTCCCTTCTCCTGGCAGAATGACTGCTATCCTTTG     |
| 1361 | CCCAACTATTTGATTTGGAAGAATAACGCAGTATATTGCCCTTGCCATGAAGTGTCTAA[A/G]TGTATTACTGTTAATGTACACATGTTTAAACA AAGGGTCAGCATAGGCTTTCATAACTGC   |
| 1362 | GCCAAGGCTCAAGATGCTTAAGAACTTACCTAACAGCAGCCATCCAGAAACCAACACAG[A/C]CAGAACCACCGAAGATCCCAAGTACAAATCCTGAGCTCTTAAAGCAACTGAGGA AACTG    |
| 1363 | TTTAAATAAATTAATGACTTTGTTCTGCCGAAGTTACCAAGTCTAAAGGAAGCAGCAGA[T/C]GAAAGACAAAGGACTTGTCCGATGTTGGTTTTCTCATAGCCCTACCTCTAATCACAGAG     |
| 1364 | aaagtctagtttgcccttctggaactctgtataagaggaatcaccaagcacacagc[A/G]tgcgtcttgggatctggctttttgtgagccaccaagtg                             |
| 1365 | TGCAGAGTTTTCTTTAAAAATAAAAAGTGCTACTTTTTAAGCCTTTGATCAAATGTTGA[T/C]ACTCCTCAACTTTGTGACTGAATCATTTAGGACAATATTTAAATTTGCCTAAAATATCT     |
| 1366 | acttgaatGGCTTTTCGTCTGCTAGCTAATGGACACCTTTTTGTGATACCCTGTTTCTT[T/G]TGATAATTTAAAACAACTACATAAAGCAATAATTA AATCTGACTGACATTAGACTTA      |
| 1367 | aacaagagaaaaaagtccattatattaccatattttacttgccatattttccct[C/G]cttctcctactctcctcttttaattgttcttcaatctattgaactttagctatt               |
| 1368 | CAGAAAAACAACATGTTGGAAAAGTGAAGTTAATCAGATTCTACAGGACTTCTTAGA[A/C]TCCTTGTGACAGCAATATGAACTAAGAATTGGTAGGAGGGTTATAGTTCTTTCTGTTTA       |
| 1369 | AAGTAGCCTGAAAAAAGCCCAAATAAAGAGGGCATGCTTCTCATGAGTCTTTATATTA[T/C]ACTATATAAGTCTGGATCAAATTAAGCATGATTTCAAAGATGAGCTAATAAATAACAG       |
| 1370 | ATCCTTTGGCAGTGCAGTTGGAGGGGTGATCTGATCATATGGATGCAGTGCAGAAAGTCC[A/G]GTGAAGATGAGTAGAGGACAGCCTCTGTGTGTGCACCTGCGTGTGCATAGGGGCAG       |
| 1371 | CTAGGTGATGAACATGAGTAGTTGGACATGAAAGCCACTTTGTTAAAGCAATGTTACTC[A/C]ATCTTTGAACTTCTTCTAGGTTATATGCCAAAAATAATGTAGTTTTTATCAAATGTATCA    |
| 1372 | TATCCTGTTTCATTTTTCTCCAAAGGCTTCTACCATGTAACCCGCTTTGTGTTCACTC[A/G]TCTATCTGTTTATTGGTTCTGAGTCTTATCACCCTTAGAATGTGTGCACAGTGTGGGG       |
| 1373 | CATACACAGGACTGGACTAGCATAAAGGCTGTGATCTGGCCGGGAGGGGATGAGCCC[A/G]TGGTTTACGCAGTGGGGTGTGCGGGGTGTGGGAGGCAGCGTACAGCTCTGGCTGTGCCCT      |
| 1374 | tctcagcagctctgaaaattttccccccttctgatggttttctgtaactttcgctca[A/G]atttttggcttaaaatcaaattgaaatctatgtaattgaggcattatttctctcac          |
| 1375 | AGCACCTGATCCTCGGAGGGATGACCCAGACGTGGGTATTCCTCTGGCAAAGTCACTC[A/G]ATAACCTCAATTAAGGCCTGGCCGTGAGCTTGTGTGAGTGCCTCCTGAGTCTTCACCTGC     |
| 1376 | TGTTTTAAAGCAGTGAGTGGAGCCAGCCAACCTATGTTTGCATCTCAAAGTCATCTCC[A/G]AACTGTCCATCTCACTCTCCAGGTCATCATGGTCGCTCTTGCTGTTTGTTTTTAATT        |
| 1377 | TAGGGCTCTACCCCTGTGACCTGATTTAACCTGGTCAGCTCTTGCTTATCGTTTTTAGC[T/C]GTATTACCTCCTTATCGTTTTTCTGTATTTATGCTGTGCATAGCAAGTGGCATTTTCTG     |
| 1378 | AGTTGGCATATTAATTAATGTAACATGGGATATTATAACAAGTGGATATGGCATAGGA[T/C]GGATTACAGCAAAGCTATAAGTAACATGGGAGAAGATTAACACAGCAGATATCCAGTTTC     |
| 1379 | CTGCAGGGGCCATAGTGGCCAAAATGAGGGGAGCTTTACTCTGGGGTGTGGTACTTTGA[T/C]TGGCTGCCTGTGTTTTTTGAGGTGGTTTTATTTTTCTTTACCAGTAGGGCTGTGTTTTAA    |
| 1380 | AAAAATAGGAAATCCATCCCTTTCCAGTTCCTCACCCAAAAAATGGGTGCTGATCAAT[T/C]GGTTGTGTAGGTAAAGGGATGAGAAGAGGGTATCTTGATTCAATTCCTTTTCTCCAACA      |
| 1381 | AAGCTGGGGGGTGGGATGGACCACATAATGCTCTGTGCCCTTCTAACTCACTCTATCT[A/G]TGATTCCAAGAACGCAAGTCCAGGAGAAGGTTTCAAGTCTCCATGGAGACTCTCTTATAT     |
| 1382 | ATCAGCATTCTGACTCATAAAAGCTATTCTGAAGTGTGAGCCAATACCAGGGTTGCACC[A/G]CATTTCTCCAGCAGTGCTTCCAGGAGTAAGGTTTCAATCCATTTCTCCAGCAGTGCTT      |
| 1383 | GTCATACCCCAACTTCCACTCAACTTCCAAGGCAGATACCATCCCTGTGAATCTCCACA[A/T]CCTATATGAAAATTTCCATCATTCATCCTAGGAACTGTGCAAAGTACTGGAACAAGCACT    |
| 1384 | ACTTTTAAAGGGTGCATGTGATTGGGTGAGGCTCGCCCAATAATCTCCTTGTGAGTAA[T/C]TCAAAGTCAACTGAGAAGTCTTTCTGCCATGTGGCCTAATAAACAAGGAGTGACAGC        |
| 1385 | GGTAGAATAAGTAGTTTCAAGCTAGAGCAATCCAATTTACTCAAGGCTCAACTCCAAT[A/G]CCTCTAGCTTTACAAAGAATTTCTCTAAGTGAAGAAATTTCTCACTTAGAGAAATtctttt    |
| 1386 | GGAGAGTAGGAGGAAGAGAAAGAGGGAAACAAGGAGGAGAAAGAGGAAAAGAAGAGAAGT[T/C]JAAAGAGAAGAAAACCCAGGGGAAGAAGGAGAAGAAGACAGACCAACAGGAGAGTAAA     |
| 1387 | GATTTCTCTCACTTCTTTGGAGGGTCCCTTCCACTGATAGCTTAAAGTGTGACGAAAG[A/G]TTCCTTTCACTGAACCACAGTATTTCCTTGAAGCTTCAACCCACTAGCTCTAGTTCTCT      |

|      | A        | B         | C          | D                                                                              | E         | F     | G          | H             | I      | J      |
|------|----------|-----------|------------|--------------------------------------------------------------------------------|-----------|-------|------------|---------------|--------|--------|
| 1    | Cytoband | Gene Name | Gene Alias | Description                                                                    | Size (kb) | Chrom | SNP ID     | Position (bp) | htSNP* | Coding |
| 1388 | 16p13.2  | GRIN2A    | NMDAR2A    | glutamate receptor, ionotropic, N-methyl D-aspartate 2A                        | 421.2     | 16    | rs2315510  | 9928092       | T      |        |
| 1389 | 16p13.2  | GRIN2A    | NMDAR2A    | glutamate receptor, ionotropic, N-methyl D-aspartate 2A                        | 421.2     | 16    | rs11074504 | 9941777       | T      |        |
| 1390 | 16p13.2  | GRIN2A    | NMDAR2A    | glutamate receptor, ionotropic, N-methyl D-aspartate 2A                        | 421.2     | 16    | rs10500369 | 9944975       | T      |        |
| 1391 | 16p13.2  | GRIN2A    | NMDAR2A    | glutamate receptor, ionotropic, N-methyl D-aspartate 2A                        | 421.2     | 16    | rs1875209  | 9945555       | T      |        |
| 1392 | 16p13.2  | GRIN2A    | NMDAR2A    | glutamate receptor, ionotropic, N-methyl D-aspartate 2A                        | 421.2     | 16    | rs4782090  | 9955433       | T      |        |
| 1393 | 16p13.2  | GRIN2A    | NMDAR2A    | glutamate receptor, ionotropic, N-methyl D-aspartate 2A                        | 421.2     | 16    | rs884918   | 9967327       | T      |        |
| 1394 | 16p13.2  | GRIN2A    | NMDAR2A    | glutamate receptor, ionotropic, N-methyl D-aspartate 2A                        | 421.2     | 16    | rs3104703  | 9972637       | T      |        |
| 1395 | 16p13.2  | GRIN2A    | NMDAR2A    | glutamate receptor, ionotropic, N-methyl D-aspartate 2A                        | 421.2     | 16    | rs11641062 | 9990252       | T      |        |
| 1396 | 16p13.2  | GRIN2A    | NMDAR2A    | glutamate receptor, ionotropic, N-methyl D-aspartate 2A                        | 421.2     | 16    | rs2243716  | 9995650       | T      |        |
| 1397 | 16p13.2  | GRIN2A    | NMDAR2A    | glutamate receptor, ionotropic, N-methyl D-aspartate 2A                        | 421.2     | 16    | rs3848328  | 10002888      | T      |        |
| 1398 | 16p13.2  | GRIN2A    | NMDAR2A    | glutamate receptor, ionotropic, N-methyl D-aspartate 2A                        | 421.2     | 16    | rs1237957  | 10004371      | T      |        |
| 1399 | 16p13.2  | GRIN2A    | NMDAR2A    | glutamate receptor, ionotropic, N-methyl D-aspartate 2A                        | 421.2     | 16    | rs844395   | 10010407      | T      |        |
| 1400 | 16p13.2  | GRIN2A    | NMDAR2A    | glutamate receptor, ionotropic, N-methyl D-aspartate 2A                        | 421.2     | 16    | rs1969060  | 10024638      | T      |        |
| 1401 | 16p13.2  | GRIN2A    | NMDAR2A    | glutamate receptor, ionotropic, N-methyl D-aspartate 2A                        | 421.2     | 16    | rs8052800  | 10040290      | T      |        |
| 1402 | 16p13.2  | GRIN2A    | NMDAR2A    | glutamate receptor, ionotropic, N-methyl D-aspartate 2A                        | 421.2     | 16    | rs7197547  | 10043745      | T      |        |
| 1403 | 16p13.2  | GRIN2A    | NMDAR2A    | glutamate receptor, ionotropic, N-methyl D-aspartate 2A                        | 421.2     | 16    | rs2352740  | 10064582      | T      |        |
| 1404 | 16p13.2  | GRIN2A    | NMDAR2A    | glutamate receptor, ionotropic, N-methyl D-aspartate 2A                        | 421.2     | 16    | rs9302409  | 10072531      | T      |        |
| 1405 | 16p13.2  | GRIN2A    | NMDAR2A    | glutamate receptor, ionotropic, N-methyl D-aspartate 2A                        | 421.2     | 16    | rs6497676  | 10087724      | T      |        |
| 1406 | 16p13.2  | GRIN2A    | NMDAR2A    | glutamate receptor, ionotropic, N-methyl D-aspartate 2A                        | 421.2     | 16    | rs1448239  | 10094936      | T      |        |
| 1407 | 16p13.2  | GRIN2A    | NMDAR2A    | glutamate receptor, ionotropic, N-methyl D-aspartate 2A                        | 421.2     | 16    | rs2352748  | 10106606      | T      |        |
| 1408 | 16p13.2  | GRIN2A    | NMDAR2A    | glutamate receptor, ionotropic, N-methyl D-aspartate 2A                        | 421.2     | 16    | rs4782262  | 10120001      | T      |        |
| 1409 | 16p13.2  | GRIN2A    | NMDAR2A    | glutamate receptor, ionotropic, N-methyl D-aspartate 2A                        | 421.2     | 16    | rs1375071  | 10131081      | T      |        |
| 1410 | 16p13.2  | GRIN2A    | NMDAR2A    | glutamate receptor, ionotropic, N-methyl D-aspartate 2A                        | 421.2     | 16    | rs1070487  | 10143493      | T      |        |
| 1411 | 16p13.2  | GRIN2A    | NMDAR2A    | glutamate receptor, ionotropic, N-methyl D-aspartate 2A                        | 421.2     | 16    | rs1345424  | 10158160      | T      |        |
| 1412 | 16p13.2  | GRIN2A    | NMDAR2A    | glutamate receptor, ionotropic, N-methyl D-aspartate 2A                        | 421.2     | 16    | rs4587976  | 10163636      | T      |        |
| 1413 | 16p13.2  | GRIN2A    | NMDAR2A    | glutamate receptor, ionotropic, N-methyl D-aspartate 2A                        | 421.2     | 16    | rs1650420  | 10175831      | T      |        |
| 1414 | 16p13.2  | GRIN2A    | NMDAR2A    | glutamate receptor, ionotropic, N-methyl D-aspartate 2A                        | 421.2     | 16    | rs1868291  | 10176699      | T      |        |
| 1415 | 16p13.2  | GRIN2A    | NMDAR2A    | glutamate receptor, ionotropic, N-methyl D-aspartate 2A                        | 421.2     | 16    | rs1071504  | 10187517      | T      |        |
| 1416 | 16p13.11 | NDE1      |            | nuclear distribution gene E (nudE) homolog 1                                   | 74.9      | 16    | rs4781678  | 15654613      | G      |        |
| 1417 | 16p13.11 | NDE1      |            | nuclear distribution gene E (nudE) homolog 1                                   | 74.9      | 16    | rs2242549  | 15705711      | G      |        |
| 1418 | 16p13.11 | NDE1      |            | nuclear distribution gene E (nudE) homolog 1                                   | 74.9      | 16    | rs881803   | 15709835      | G      |        |
| 1419 | 16p13.11 | NDE1      |            | nuclear distribution gene E (nudE) homolog 1                                   | 74.9      | 16    | rs2075512  | 15721446      | G      |        |
| 1420 | 16p13.11 | NDE1      |            | nuclear distribution gene E (nudE) homolog 1                                   | 74.9      | 16    | rs2075511  | 15725642      | G      |        |
| 1421 | 17p13.3  | YWHAE     | 14-3-3E    | tyrosine 3-monooxygenase/tryptophan 5-monooxygenase activation protein epsilon | 55.7      | 17    | rs9393     | 1195142       | T      |        |
| 1422 | 17p13.3  | YWHAE     | 14-3-3E    | tyrosine 3-monooxygenase/tryptophan 5-monooxygenase activation protein epsilon | 55.7      | 17    | rs7266     | 1195216       | T      |        |
| 1423 | 17p13.3  | YWHAE     | 14-3-3E    | tyrosine 3-monooxygenase/tryptophan 5-monooxygenase activation protein epsilon | 55.7      | 17    | rs8078073  | 1215433       | T      |        |
| 1424 | 17p13.3  | YWHAE     | 14-3-3E    | tyrosine 3-monooxygenase/tryptophan 5-monooxygenase activation protein epsilon | 55.7      | 17    | rs10521111 | 1228614       | T      |        |
| 1425 | 17p13.3  | YWHAE     | 14-3-3E    | tyrosine 3-monooxygenase/tryptophan 5-monooxygenase activation protein epsilon | 55.7      | 17    | rs4790084  | 1229729       | T      |        |
| 1426 | 17p13.3  | YWHAE     | 14-3-3E    | tyrosine 3-monooxygenase/tryptophan 5-monooxygenase activation protein epsilon | 55.7      | 17    | rs9912147  | 1231072       | T      |        |
| 1427 | 17p13.3  | PAFAH1B1  | LIS1       | platelet-activating factor acetylhydrolase, isoform 1b, alpha subunit          | 92.0      | 17    | rs8068673  | 2449136       | G      |        |
| 1428 | 17p13.3  | PAFAH1B1  | LIS1       | platelet-activating factor acetylhydrolase, isoform 1b, alpha subunit          | 92.0      | 17    | rs1266475  | 2482070       | G      |        |
| 1429 | 17p13.3  | PAFAH1B1  | LIS1       | platelet-activating factor acetylhydrolase, isoform 1b, alpha subunit          | 92.0      | 17    | rs8081803  | 2511759       | G      |        |

Key appears on page 109.

|      | K      | L      | M                       | N       | O       | P       | Q       |
|------|--------|--------|-------------------------|---------|---------|---------|---------|
| 1    | Prom** | TFBS** | Association (reference) | MAF_CEU | MAF_YRI | MAF_JPT | MAF_HCB |
| 1388 |        |        |                         | 0.11    | 0.19    | 0.00    | 0.00    |
| 1389 |        |        |                         | 0.42    | 0.48    | 0.17    | 0.24    |
| 1390 |        |        |                         | 0.22    | 0.16    | 0.08    | 0.02    |
| 1391 |        |        |                         | 0.29    | 0.07    | 0.23    | 0.27    |
| 1392 |        |        |                         | 0.10    | 0.00    | 0.32    | 0.40    |
| 1393 |        |        |                         | 0.44    | 0.42    | 0.44    | 0.47    |
| 1394 |        |        |                         | 0.50    | 0.35    | 0.39    | 0.41    |
| 1395 |        |        |                         | 0.42    | 0.24    | 0.32    | 0.32    |
| 1396 |        |        |                         | 0.11    | 0.09    | 0.24    | 0.38    |
| 1397 |        |        |                         | 0.28    | 0.42    | 0.39    | 0.43    |
| 1398 |        |        |                         | 0.10    | 0.04    | 0.27    | 0.40    |
| 1399 |        |        |                         | 0.42    | 0.43    | 0.42    | 0.49    |
| 1400 |        |        |                         | 0.17    | 0.47    | 0.48    | 0.44    |
| 1401 |        |        |                         | 0.49    | 0.29    | 0.10    | 0.10    |
| 1402 |        |        |                         | 0.44    | 0.38    | 0.02    | 0.10    |
| 1403 |        |        |                         | 0.32    | 0.37    | 0.01    | 0.02    |
| 1404 |        |        |                         | 0.13    | 0.37    | 0.00    | 0.00    |
| 1405 |        |        |                         | 0.38    | 0.31    | 0.42    | 0.46    |
| 1406 |        |        |                         | 0.15    | 0.39    | 0.17    | 0.02    |
| 1407 |        |        |                         | 0.25    | 0.25    | 0.45    | 0.46    |
| 1408 |        |        |                         | 0.08    | 0.36    | 0.15    | 0.01    |
| 1409 |        |        |                         | 0.35    | 0.25    | 0.27    | 0.24    |
| 1410 |        |        |                         | 0.41    | 0.37    | 0.15    | 0.13    |
| 1411 |        |        |                         | 0.34    | 0.20    | 0.34    | 0.41    |
| 1412 |        |        |                         | 0.41    | 0.36    | 0.25    | 0.14    |
| 1413 |        |        |                         | 0.29    | 0.48    | 0.44    | 0.44    |
| 1414 |        |        |                         | 0.04    | 0.18    |         |         |
| 1415 |        |        |                         | 0.36    | 0.41    | 0.10    | 0.10    |
| 1416 |        |        |                         | 0.49    | 0.13    | 0.35    | 0.34    |
| 1417 |        |        |                         | 0.48    | 0.28    | 0.40    | 0.38    |
| 1418 |        |        |                         | 0.39    | 0.28    | 0.40    | 0.40    |
| 1419 |        |        |                         | 0.47    | 0.13    | 0.48    | 0.43    |
| 1420 |        |        |                         | 0.43    | 0.23    | 0.27    | 0.26    |
| 1421 |        |        |                         | 0.07    | 0.13    | 0.34    | 0.16    |
| 1422 |        |        |                         | 0.09    | 0.00    | 0.00    | 0.00    |
| 1423 |        |        |                         | 0.23    | 0.49    | 0.00    | 0.00    |
| 1424 |        |        |                         | 0.14    | 0.00    | 0.00    | 0.00    |
| 1425 |        |        |                         | 0.39    | 0.33    | 0.46    | 0.39    |
| 1426 |        |        |                         | 0.50    | 0.04    | 0.49    | 0.44    |
| 1427 |        |        |                         | 0.30    | 0.30    | 0.14    | 0.14    |
| 1428 |        |        |                         | 0.32    | 0.22    | 0.14    | 0.14    |
| 1429 |        |        |                         | 0.26    | 0.12    | 0.01    | 0.07    |

Key appears on page 109.

|      | R                                                                                                                              |
|------|--------------------------------------------------------------------------------------------------------------------------------|
| 1    | Sequence                                                                                                                       |
| 1388 | GGGATAAAATACTTTAAAAAGCCCTGGAGGTAACATGGATAAAATAAACCAACCCAGGTGG[T/G]GACTAAGGTGACTGCGCAGAGATGACAGTCACTTCCAGCTTCCAGTTGATCATTAGCAG  |
| 1389 | TAATTAATAATTAAGTGGTAATAGATTTAAAGACTTTGGATAATTATTGTTTTCC[C/T/G]ACAGTAGCTTTTGCAGAAATCTAATATTCTTGAATTGATTAACCATTTTAAATCACATCT     |
| 1390 | AAGGTTACAAAGCCCATCCACACCCATTATCTTTGATCCTAAGACTCAAGAGATAAC[A/G]CAAGTGGCATAACACTCATGGATGGCATTCTCCTAAAGACACAGGATGAGAGGTTAAAT      |
| 1391 | GAGGTAACCTCAGCAACGATCCAGAGACTCCTGGGAATTTGCATTCTCCTGTTGAGGA[T/C]TGCCCTTGTGAGCCCTGGTAAGCCCTGATGTGCTTTCTGTTACTCTCATAGTGTATCAAC    |
| 1392 | ACTGGGGTCAGGGGGCTCCTCCTCCTGCTTTCTTTTTCCCATTCCTCAATGTCCTCA[A/T]GTCAATCCTTCTGTCTAGACAGAGAACTTGTGCCAGAAAACACAGGATATCCTAAAAT       |
| 1393 | ATATTGACTATCTGGGCTTTTAAATAAAACACTTGCCAAATTGCTGCTTTACAATACTTT[C/T/G]GTAGCTTATCAAATAATCTTGGGATCTTTTAAATATGCAGCACCTTAAGCCCAAGATC  |
| 1394 | ATAGAAAAGCCTAATTTTCAGTAAAACAGAAGCTTCCACTTCTTCCCTGATATAACAATT[T/G]CCCTTGGGTATGCAACTCAAACTCAACCACCATGCTTTGTGAAATCCAAGCCACATAA    |
| 1395 | TTTTGATGGAATGTAGCCCAAGATCCCCCAGAACAGAACCATGATAACCAGACAGGAGGA[C/G]GGTCTACAACCTAATCTCATTTCCTTCAAGCCAAATTGAAGACTTGATATCTTGGT      |
| 1396 | CCTGTCAGAATGCAAAGCCCATTTGTCAGTTCCTGGATAGTTTCTTTCAGCTATTTCAAG[A/G]GGTGACCTGGGTTACTTCCCCCATCTTCTGTACTCAGGCCTTGATGCTCTCTCTCT      |
| 1397 | GATTTTGCTCCTTCCAACCTCTGCCCTACATACCCTCTGCTGAAACTATCTTATGGCTG[A/G]TGCCCATCGTGAACACAACATGGGAACCTGCCAACATCCACAAGTGTCTCCATGCATG     |
| 1398 | ATTCATCAGTACTTTGAAAAATGGAATAAACTTTAAGCATTAACTAGCAGAAAAATCTG[C/G]CATATTGCTGCTGAGTGAGTGTGTAGCAACTGACAATTATGGACAGTAGAACTCAAATA    |
| 1399 | AGCTTACACTCTGATGGAGAGAGACAGGCAATACACTAATACAGATGAAAATACGTTATA[T/C]GTCAAGTCTGATAAAGTCCCGTATTTATGCTGGAATTTGGGTGAATCATGTCAATTTGC   |
| 1400 | AATAGATTATGTAATATTTATTCAATGATTTTACTTGTCTGTTGTTATAGAGCCCTGC[T/C]TCAGTTGGATGAGTTATTTAGATTTGGAAGTGTCTCGTTCTTAGCTTGGGAATGCAGC      |
| 1401 | AAACAAAAAAACAAAAACCCACCCTAGATATTGCCAAATGTCCCTGGCCTAGATAATT[C/G]CAACTAGTCTTCAAAAATCAGGGCAGTGTACCTCCTCCAGGAAGCCCCCTGGCCCCCT      |
| 1402 | TTGGATCACTCACTCTGAGGAAGTTGGCTGCCATGACATGAGGGACTTCAAGCAGCCCCA[T/C]GGAGAGGTTCTCAAAAATCAATAAATGAGGCCCTGCCAGCAGCCTCGGAAACAGCCAT    |
| 1403 | GCTAAACACTGGGTATACATGGATATAAAAATGGGAATAGACACTGGGGATGATGATAAG[T/C]GTGAGGAGAGCAAGGCTGAAAAACTACCTGTTGTGAACTATGCTCACTACTTGGATGATG  |
| 1404 | CAGCTTAAGTAATACCTACATAAAAAGAACCATGCCTAGCACATGGCTGAATGTTGAATAC[T/C]GTTGCATGGAAATTTGGGATTTCTAGTTAGAGGCTTTATAAAGGTAGAATCATGCAGACA |
| 1405 | CAGGAATGCTCAACAGATGTGGATAATGAGTATGGAGGAGCAATGATGCCAAAAATAATT[A/G]TTCCTTGGGCCCTTAGATCTTCTCACTTCCCCTGAGGAGAGATTGTGCATTCTGCCTAC   |
| 1406 | GGTTTTTGTTTTTTTTTTCACTTTGTTGCCCGGTATTCCCTAAAAACCCAGAGACT[C/G]TAGCTCTTAAATATAAGGCTGATTAAGCTGATCGATGCCACCTGACTATAACTGTCA         |
| 1407 | CCCCTGACAAAAAGCCTAAGGATCCTCACCCAGCAATGCTGACCACGACCATTTAAACAT[A/G]AAGCCCACCCCAAGAGGAAAATCCTTGCCTTTAATGAAGCTGCCAAAAACCTCCAAA     |
| 1408 | GGGCACAATCTATGCTTCCAGTCTGGTATGGCGGAGAAGAAAAGATTCAAGTAGCAGA[T/C]AGACTGCTGTATCTAAAAACTTGGGTTCTTTCCAGCTCCATCTTAACTGTGCAGAAA       |
| 1409 | TTGGTCTGAGATATAAGCAGGAGATTATGGTGTCTCTTAGGCCACAGCAAGCAATTGA[T/C]TTAATTCTAGGTAATAAGGCTGGAGGAAGATTTAATAAAGATGCATGTGATTCA          |
| 1410 | GCTACCTGTTCTGAGTTATAGGAAATATCCCAAAGCGCCCATGCTCCTACCATTCCAGGGT[A/G]CAAAAGAGCACGAACCCACAAGAAGATTTGGAAGATTTACTGAGCCACAGGGAAATGAG  |
| 1411 | CAATGACATGTTTACACTTGTATTTCTTACAGTTTTCAGGGTTTTCATACAGCTT[A/T/C]TTCAATCGATCCTAATAAGAACCCTGAGAGGTAGATTTCAACTGTGCTTTCCAAAAGTAA     |
| 1412 | TGTCCAGAAAGGGAGCCACATGAGAAGAACAAGTCAGTGTAGAGCAGGTGGAGGCT[C/G]GGTCTGAGCTGAGGTGTCTTACTCCACTGAGGTCAGTTACAGAAGAGGAGTGAGGAG         |
| 1413 | TTCTTCTGATTGCTCTAGCATCTTTCTTCTCAGTTGTGAAGTCTTATTTGTAGA[A/G]TCAGTTAGTTGGATGTTACATATGTTCTTTAATTTTTGTTGTGAACCTATTTTCAAGG          |
| 1414 | TATTGTCTTTGCCCTCTGTGACTTTCTTAGAGGATTCAGATTTTCTTAAATTCTGGA[A/G]AAAATCTCAGCCGCTATCTGTTGGATTCTTTCTTCCATCATTCTTCTATTCTCTCCTT       |
| 1415 | GGTATTCAGGGTTTTAAGTTATTCATGATCAGACTTATAGAAAGATAAATCAAACCTGATA[T/C]GGCCTCTTTGAATAGAGAAAAGGCAGCCCTTATTGGAAGGGACACTGTGCCTCTAA     |
| 1416 | CAACTGCATCGTTTTCCATTAGTCTCTGTTGACATTGAGGTTTCCAGTTTTCCACATT[A/C]GTGAATGATGGTGTGCATCTTTGAACATGGGTCCTGCCTGCCTAAGTATTTTGTAGGT      |
| 1417 | AGCCTGACATATTGAAAAGCAGATCGTCTTGTGTTGAAAAACCTTCTCCACCCACCCCG[A/C]AACCAATTTAGCTGATTAATTAATCACTCATGCCTTAAGACTGGCAATGATTTGTTG      |
| 1418 | ACTGCATCTTGACGAGATGGCAGAGGCTGTGTGTAGCTTGGATTTTTCTTCTTTCAT[A/G]CCAAAAGCCACTTTACGTGGTTAGGGCACTCAGCAGTGTCTCCTCCCTGTCCAGTGA        |
| 1419 | GGGTGACACTAGGAGCTTGGGGCATGGGTGGAGGGAGGGCACAGTTCCCTCAGGCCACC[A/G]AAGTCAGCAGAGCGGGCTCCAGGAAGCAAGCCTGCACCTGCCATTGGTGTGGGTTACAGT   |
| 1420 | GAAGAGGTTCCAGAAGGAGATCGAGAACCTCACCCAGCAGTACGAGGAGAAGGCGGCCG[C/T/G]TATGATAAACTGGAAAAGACCAAGAAGGCTTACAGCAGGAGCTGGACGACCTGGTTGTT  |
| 1421 | CCAGATGTGGCAAGATCACCATTAGCAAATGAAAATTACATTTGAAAGCCATTAGACTTA[T/C]AGGTGATGCAAGCATCTAAGAGAGAGGTTAATCACACTATAGAGGCATAAGTGGTATCAG  |
| 1422 | CCAGCTTTTAGGTTCTTTAAGACACTAACAGGACTACATAGAGGCTTTTTCAGCATTACT[A/G]TGTGCTCTCCGTGCCAGATGTGGCAAGATCACCATTAGCAAATGAAAATTACATTTGAAA  |
| 1423 | TCTCATTAATAAGGTAATTAGGCACACCTAATTTTCCAGCAAAAAAAATGAGCTG[T/C]CAGTTTAAAGAGAAAGATTAAGAATTTACAGGTTCTAAAATGTATTGTCTCACAATAAAT       |
| 1424 | TATTGCTCTGAAATGGTCTGAGTCAGGCTTTTATAGCATGCTTTTATGACAGAAGTGA[T/C]GCTTCCAGATTATTTGTGAGTGTGATAGAGAAGGTGCGTGATAATCGTTTTAGAAAAAA     |
| 1425 | AATCATATTTTCTTAGAAAAACAAAATGCAAGAATAGTGATCACTAGTTCTACTCAATTA[A/G]GATGAGCAAAAGGCTGGGATGTACCCTGGAGCGTGTACGATGAGTTATGAAGGAAGGAG   |
| 1426 | TTCTAGCCACAGCTTGCCTGATTAGACTGTAACCTTCCATAGTAGGTTATTAAGTAAC[C/G]ATTTTATTACTACAAGGGGAAAGTTGTTCCCATACATGCTAAAAGAAATACATATTGAT     |
| 1427 | CTTCTTGTGAAACTTACCTAGATAGGACTAATCTGCATTTGTCAAGGATACTTCTGGAA[T/C]GGTACTCTCTATTGTCTTTTAACTTGTACATAAAGCTTTCTCTAGAACTTTCTAAATATT   |
| 1428 | CCCATTACCCAGCCTCAACAGTTAGCAATTCAAAGCCTGTCTTGTTCATGTATCTCTCT[T/C]ATTCACTGTCTATTACCAAGTCACAGACATGATATTATTTTACTTCGATTTGATGTAGCT   |
| 1429 | CTTTAAATGGTCTAGTAAGAAAACATCTCAGTTCATCAGCCTTGGACTTAACTTGTTT[T/C]TTCTTCAATGAGCAATGAAATTAATAAGGTTACGGAACCTTAGAACTTTTCTATTCTT      |

Complete list of all 94 genes and 1,536 SNPs present on the COGS SNP Chip

|      | A        | B         | C          | D                                                                                         | E         | F     | G          | H             | I      | J         |
|------|----------|-----------|------------|-------------------------------------------------------------------------------------------|-----------|-------|------------|---------------|--------|-----------|
| 1    | Cytoband | Gene Name | Gene Alias | Description                                                                               | Size (kb) | Chrom | SNP ID     | Position (bp) | htSNP* | Coding    |
| 1430 | 17p13.3  | PAFAH1B1  | LIS1       | platelet-activating factor acetylhydrolase, isoform 1b, alpha subunit                     | 92.0      | 17    | rs2317297  | 2523841       | G      |           |
| 1431 | 17p13.1  | DLG4      | PSD95      | discs, large homolog 4                                                                    | 29.8      | 17    | rs11650232 | 7029647       | T      |           |
| 1432 | 17p13.1  | DLG4      | PSD95      | discs, large homolog 4                                                                    | 29.8      | 17    | rs314253   | 7032374       | T      |           |
| 1433 | 17p13.1  | DLG4      | PSD95      | discs, large homolog 4                                                                    | 29.8      | 17    | rs222853   | 7054704       | T      |           |
| 1434 | 17p13.1  | DLG4      | PSD95      | discs, large homolog 4                                                                    | 29.8      | 17    | rs507506   | 7059046       | T      |           |
| 1435 | 17p13.1  | NDEL1     | NUDEL      | nuclear distribution gene E (nudE) homolog like 1                                         | 44.8      | 17    | rs1391768  | 8281591       | G      |           |
| 1436 | 17q11.2  | SLC6A4    | SERT, 5HTT | solute carrier family 6, member 4 (serotonin transporter)                                 | 37.8      | 17    | rs2054847  | 25556139      | T      |           |
| 1437 | 17q11.2  | SLC6A4    | SERT, 5HTT | solute carrier family 6, member 4 (serotonin transporter)                                 | 37.8      | 17    | rs140700   | 25567515      | T      |           |
| 1438 | 17q11.2  | SLC6A4    | SERT, 5HTT | solute carrier family 6, member 4 (serotonin transporter)                                 | 37.8      | 17    | rs6355     | 25572936      | T      | Gly56Ala  |
| 1439 | 17q11.2  | SLC6A4    | SERT, 5HTT | solute carrier family 6, member 4 (serotonin transporter)                                 | 37.8      | 17    | rs8073965  | 25583308      | T      |           |
| 1440 | 17q11.2  | SLC6A4    | SERT, 5HTT | solute carrier family 6, member 4 (serotonin transporter)                                 | 37.8      | 17    | rs2020933  | 25585881      | T      |           |
| 1441 | 17q11.2  | SLC6A4    | SERT, 5HTT | solute carrier family 6, member 4 (serotonin transporter)                                 | 37.8      | 17    | rs4392119  | 25589489      | T      |           |
| 1442 | 17q12    | PPP1R1B   | DARPP-32   | protein phosphatase 1, regulatory subunit 1B (dopamine and cAMP regulated phosphoprotein) | 9.7       | 17    | rs4795390  | 35035136      |        |           |
| 1443 | 17q12    | PPP1R1B   | DARPP-32   | protein phosphatase 1, regulatory subunit 1B (dopamine and cAMP regulated phosphoprotein) | 9.7       | 17    | rs879606   | 35035375      |        |           |
| 1444 | 17q12    | PPP1R1B   | DARPP-32   | protein phosphatase 1, regulatory subunit 1B (dopamine and cAMP regulated phosphoprotein) | 9.7       | 17    | rs907094   | 35043897      |        |           |
| 1445 | 17q12    | PPP1R1B   | DARPP-32   | protein phosphatase 1, regulatory subunit 1B (dopamine and cAMP regulated phosphoprotein) | 9.7       | 17    | rs3764352  | 35044465      |        |           |
| 1446 | 17q21.31 | CRHR1     | CRF1       | corticotropin releasing hormone receptor 1                                                | 51.5      | 17    | rs4792882  | 41225048      | T      |           |
| 1447 | 17q21.31 | CRHR1     | CRF1       | corticotropin releasing hormone receptor 1                                                | 51.5      | 17    | rs4792887  | 41232791      | T      |           |
| 1448 | 17q21.31 | CRHR1     | CRF1       | corticotropin releasing hormone receptor 1                                                | 51.5      | 17    | rs81189    | 41250579      | T      |           |
| 1449 | 17q21.31 | CRHR1     | CRF1       | corticotropin releasing hormone receptor 1                                                | 51.5      | 17    | rs242939   | 41251360      | T      |           |
| 1450 | 19q13.12 | MAG       |            | myelin-associated glycoprotein                                                            | 21.7      | 19    | rs10432275 | 40481735      | T      |           |
| 1451 | 19q13.12 | MAG       |            | myelin-associated glycoprotein                                                            | 21.7      | 19    | rs11669734 | 40486615      | T      |           |
| 1452 | 19q13.31 | APOE      |            | apolipoprotein E                                                                          | 3.6       | 19    | rs405509   | 50100676      | T      |           |
| 1453 | 20q11.23 | SLC32A1   | VGAT       | solute carrier family 32, member 1 (vesicular GABA transporter)                           | 4.9       | 20    | rs6092935  | 36783319      | T      |           |
| 1454 | 20q11.23 | SLC32A1   | VGAT       | solute carrier family 32, member 1 (vesicular GABA transporter)                           | 4.9       | 20    | rs1322183  | 36791688      | T      |           |
| 1455 | 20q11.23 | SLC32A1   | VGAT       | solute carrier family 32, member 1 (vesicular GABA transporter)                           | 4.9       | 20    | rs1321099  | 36792059      | T      |           |
| 1456 | 20q11.23 | SLC32A1   | VGAT       | solute carrier family 32, member 1 (vesicular GABA transporter)                           | 4.9       | 20    | rs1406857  | 36795846      | T      |           |
| 1457 | 20q13.33 | CHRNA4    |            | cholinergic receptor, nicotinic, alpha 4                                                  | 30.7      | 20    | rs4522666  | 61444924      | T      |           |
| 1458 | 20q13.33 | CHRNA4    |            | cholinergic receptor, nicotinic, alpha 4                                                  | 30.7      | 20    | rs3787138  | 61449668      | T      |           |
| 1459 | 20q13.33 | CHRNA4    |            | cholinergic receptor, nicotinic, alpha 4                                                  | 30.7      | 20    | rs755204   | 61464609      | T      |           |
| 1460 | 20q13.33 | CHRNA4    |            | cholinergic receptor, nicotinic, alpha 4                                                  | 30.7      | 20    | rs755203   | 61464708      | T      |           |
| 1461 | 22q11.21 | PRODH     |            | proline dehydrogenase 1                                                                   | 23.8      | 22    | rs385440   | 17281090      | T      |           |
| 1462 | 22q11.21 | PRODH     |            | proline dehydrogenase 1                                                                   | 23.8      | 22    | rs9618419  | 17287405      | T      |           |
| 1463 | 22q11.21 | PRODH     |            | proline dehydrogenase 1                                                                   | 23.8      | 22    | rs5746640  | 17291157      | T      |           |
| 1464 | 22q11.21 | PRODH     |            | proline dehydrogenase 1                                                                   | 23.8      | 22    | rs2241305  | 17292429      | T      |           |
| 1465 | 22q11.21 | PRODH     |            | proline dehydrogenase 1                                                                   | 23.8      | 22    | rs2016108  | 17295963      | T      |           |
| 1466 | 22q11.21 | PRODH     |            | proline dehydrogenase 1                                                                   | 23.8      | 22    | rs367766   | 17297031      | T      |           |
| 1467 | 22q11.21 | PRODH     |            | proline dehydrogenase 1                                                                   | 23.8      | 22    | rs759406   | 17297748      | T      |           |
| 1468 | 22q11.21 | PRODH     |            | proline dehydrogenase 1                                                                   | 23.8      | 22    | rs4819757  | 17300516      | T      |           |
| 1469 | 22q11.21 | PRODH     |            | proline dehydrogenase 1                                                                   | 23.8      | 22    | rs8137125  | 17303183      | T      |           |
| 1470 | 22q11.21 | PRODH     |            | proline dehydrogenase 1                                                                   | 23.8      | 22    | rs9604911  | 17304956      | T      |           |
| 1471 | 22q11.21 | DGCR2     | DGS-C      | DiGeorge syndrome critical region gene 2                                                  | 86.2      | 22    | rs2072123  | 17406613      |        | Ala473Val |

Key appears on page 109.

|      | K      | L      | M                                        | N       | O       | P       | Q       |
|------|--------|--------|------------------------------------------|---------|---------|---------|---------|
| 1    | Prom** | TFBS** | Association (reference)                  | MAF_CEU | MAF_YRI | MAF_JPT | MAF_HCB |
| 1430 |        |        |                                          | 0.06    | 0.46    | 0.13    | 0.08    |
| 1431 |        |        |                                          | 0.46    | 0.03    | 0.00    | 0.00    |
| 1432 |        |        |                                          | 0.35    | 0.48    | 0.49    | 0.46    |
| 1433 |        |        |                                          | 0.06    | 0.02    | 0.23    | 0.20    |
| 1434 |        |        |                                          | 0.47    | 0.40    | 0.42    | 0.46    |
| 1435 |        |        |                                          | 0.41    | 0.49    | 0.24    | 0.48    |
| 1436 |        |        |                                          | 0.40    | 0.02    | 0.17    | 0.19    |
| 1437 |        |        |                                          | 0.10    | 0.04    | 0.10    | 0.06    |
| 1438 |        |        |                                          | 0.03    | 0.00    | 0.00    | 0.00    |
| 1439 |        |        |                                          | 0.01    | 0.00    | 0.00    | 0.00    |
| 1440 |        |        |                                          | 0.05    | 0.39    | 0.01    | 0.07    |
| 1441 |        |        |                                          | 0.02    | 0.00    | 0.00    | 0.00    |
| 1442 |        |        | haplotype (Meyer-Lindenberg et al. 2007) |         |         |         |         |
| 1443 |        |        | p=0.001 (Meyer-Lindenberg et al. 2007)   | 0.13    |         |         |         |
| 1444 |        |        | haplotype (Meyer-Lindenberg et al. 2007) | 0.15    | 0.14    | 0.38    | 0.43    |
| 1445 |        |        | p=0.049 (Meyer-Lindenberg et al. 2007)   |         |         |         |         |
| 1446 |        |        |                                          | 0.03    | 0.00    | 0.00    | 0.00    |
| 1447 |        |        |                                          | 0.07    | 0.30    | 0.00    | 0.00    |
| 1448 |        |        |                                          | 0.46    | 0.39    | 0.17    | 0.16    |
| 1449 |        |        |                                          | 0.07    | 0.32    | 0.00    | 0.00    |
| 1450 |        |        |                                          | 0.38    | 0.23    | 0.32    | 0.32    |
| 1451 |        |        |                                          | 0.22    | 0.00    | 0.17    | 0.19    |
| 1452 |        |        |                                          | 0.50    | 0.24    | 0.25    | 0.34    |
| 1453 |        |        |                                          | 0.23    | 0.18    | 0.05    | 0.11    |
| 1454 |        |        |                                          | 0.46    | 0.03    | 0.38    | 0.33    |
| 1455 |        |        |                                          | 0.06    | 0.40    | 0.46    | 0.47    |
| 1456 |        |        |                                          | 0.35    | 0.06    | 0.36    | 0.44    |
| 1457 |        |        |                                          | 0.38    | 0.08    | 0.41    | 0.46    |
| 1458 |        |        |                                          | 0.09    | 0.50    | 0.04    | 0.16    |
| 1459 |        |        |                                          | 0.03    | 0.16    | 0.05    | 0.14    |
| 1460 |        |        |                                          | 0.38    | 0.03    | 0.44    | 0.34    |
| 1461 |        |        |                                          | 0.08    | 0.38    | 0.03    | 0.09    |
| 1462 |        |        |                                          | 0.15    | 0.23    | 0.03    | 0.08    |
| 1463 |        |        |                                          | 0.36    | 0.48    | 0.22    | 0.29    |
| 1464 |        |        |                                          | 0.10    | 0.24    |         |         |
| 1465 |        |        |                                          | 0.26    | 0.33    | 0.27    | 0.18    |
| 1466 |        |        |                                          | 0.35    | 0.00    | 0.00    | 0.00    |
| 1467 |        |        |                                          | 0.15    | 0.33    | 0.02    | 0.03    |
| 1468 |        |        |                                          | 0.39    | 0.05    | 0.18    | 0.01    |
| 1469 |        |        |                                          | 0.09    | 0.42    | 0.03    | 0.02    |
| 1470 |        |        |                                          | 0.27    | 0.27    | 0.35    | 0.31    |
| 1471 |        |        | p=0.003 (Shifman et al. 2006)            | 0.39    | 0.42    | 0.26    | 0.34    |

Key appears on page 109.





Complete list of all 94 genes and 1,536 SNPs present on the COGS SNP Chip

|      | A        | B         | C          | D                                                   | E         | F     | G          | H             | I      | J         |
|------|----------|-----------|------------|-----------------------------------------------------|-----------|-------|------------|---------------|--------|-----------|
| 1    | Cytoband | Gene Name | Gene Alias | Description                                         | Size (kb) | Chrom | SNP ID     | Position (bp) | htSNP* | Coding    |
| 1472 | 22q11.21 | DGCR2     | DGS-C      | DiGeorge syndrome critical region gene 2            | 86.2      | 22    | rs2238735  | 17426677      | T      |           |
| 1473 | 22q11.21 | DGCR2     | DGS-C      | DiGeorge syndrome critical region gene 2            | 86.2      | 22    | rs2238754  | 17438146      | T      |           |
| 1474 | 22q11.21 | DGCR2     | DGS-C      | DiGeorge syndrome critical region gene 2            | 86.2      | 22    | rs2854659  | 17463552      | T      |           |
| 1475 | 22q11.21 | DGCR2     | DGS-C      | DiGeorge syndrome critical region gene 2            | 86.2      | 22    | rs10483100 | 17465202      | T      |           |
| 1476 | 22q11.21 | DGCR2     | DGS-C      | DiGeorge syndrome critical region gene 2            | 86.2      | 22    | rs2800972  | 17473085      | T      |           |
| 1477 | 22q11.21 | DGCR2     | DGS-C      | DiGeorge syndrome critical region gene 2            | 86.2      | 22    | rs807743   | 17483598      | T      |           |
| 1478 | 22q11.21 | DGCR2     | DGS-C      | DiGeorge syndrome critical region gene 2            | 86.2      | 22    | rs807759   | 17493686      |        |           |
| 1479 | 22q11.21 | COMT      |            | catechol-O-methyltransferase                        | 28.1      | 22    | rs737865   | 18310121      |        |           |
| 1480 | 22q11.21 | COMT      |            | catechol-O-methyltransferase                        | 28.1      | 22    | rs174675   | 18314051      | T      |           |
| 1481 | 22q11.21 | COMT      |            | catechol-O-methyltransferase                        | 28.1      | 22    | rs5993883  | 18317638      | T      |           |
| 1482 | 22q11.21 | COMT      |            | catechol-O-methyltransferase                        | 28.1      | 22    | rs740603   | 18325177      | T      |           |
| 1483 | 22q11.21 | COMT      |            | catechol-O-methyltransferase                        | 28.1      | 22    | rs740601   | 18330763      | T      |           |
| 1484 | 22q11.21 | COMT      |            | catechol-O-methyltransferase                        | 28.1      | 22    | rs4680     | 18331271      |        | Val158Met |
| 1485 | 22q11.21 | COMT      |            | catechol-O-methyltransferase                        | 28.1      | 22    | rs4646316  | 18332132      | T      |           |
| 1486 | 22q11.21 | COMT      |            | catechol-O-methyltransferase                        | 28.1      | 22    | rs165774   | 18332561      | T      |           |
| 1487 | 22q11.21 | COMT      |            | catechol-O-methyltransferase                        | 28.1      | 22    | rs174696   | 18333176      | T      |           |
| 1488 | 22q11.21 | COMT      |            | catechol-O-methyltransferase                        | 28.1      | 22    | rs174697   | 18333832      | T      |           |
| 1489 | 22q11.21 | ZDHC8     | ZNF378     | zinc finger, DHHC-type containing 8                 | 16.2      | 22    | rs175174   | 18507554      | T      |           |
| 1490 | 22q11.21 | ZDHC8     | ZNF378     | zinc finger, DHHC-type containing 8                 | 16.2      | 22    | rs2286930  | 18508880      | T      |           |
| 1491 | 22q11.23 | ADORA2A   |            | adenosine A2a receptor                              | 14.8      | 22    | rs3761422  | 23156672      | G      |           |
| 1492 | 22q11.23 | ADORA2A   |            | adenosine A2a receptor                              | 14.8      | 22    | rs2236624  | 23166024      | G      |           |
| 1493 | 22q11.23 | ADRBK2    | GRK3       | adrenergic, beta, receptor kinase 2                 | 159.0     | 22    | rs576895   | 24261580      |        |           |
| 1494 | 22q11.23 | ADRBK2    | GRK3       | adrenergic, beta, receptor kinase 2                 | 159.0     | 22    | rs558934   | 24264721      |        |           |
| 1495 | 22q11.23 | ADRBK2    | GRK3       | adrenergic, beta, receptor kinase 2                 | 159.0     | 22    | rs5761116  | 24280750      |        |           |
| 1496 | 22q11.23 | ADRBK2    | GRK3       | adrenergic, beta, receptor kinase 2                 | 159.0     | 22    | rs2283811  | 24305450      | T      |           |
| 1497 | 22q11.23 | ADRBK2    | GRK3       | adrenergic, beta, receptor kinase 2                 | 159.0     | 22    | rs1008673  | 24324013      | T      |           |
| 1498 | 22q11.23 | ADRBK2    | GRK3       | adrenergic, beta, receptor kinase 2                 | 159.0     | 22    | rs5761149  | 24376900      | T      |           |
| 1499 | 22q11.23 | ADRBK2    | GRK3       | adrenergic, beta, receptor kinase 2                 | 159.0     | 22    | rs11913984 | 24389030      | T      |           |
| 1500 | 22q11.23 | ADRBK2    | GRK3       | adrenergic, beta, receptor kinase 2                 | 159.0     | 22    | rs6004737  | 24395034      | T      |           |
| 1501 | 22q11.23 | ADRBK2    | GRK3       | adrenergic, beta, receptor kinase 2                 | 159.0     | 22    | rs718163   | 24411873      | T      |           |
| 1502 | 22q11.23 | ADRBK2    | GRK3       | adrenergic, beta, receptor kinase 2                 | 159.0     | 22    | rs5761159  | 24432308      | T      |           |
| 1503 | 22q11.23 | ADRBK2    | GRK3       | adrenergic, beta, receptor kinase 2                 | 159.0     | 22    | rs9608416  | 24441018      | T      |           |
| 1504 | 22q11.23 | ADRBK2    | GRK3       | adrenergic, beta, receptor kinase 2                 | 159.0     | 22    | rs6519621  | 24441816      | T      |           |
| 1505 | 22q12.3  | CACNG2    |            | calcium channel, voltage-dependent, gamma subunit 2 | 138.8     | 22    | rs4820239  | 35288854      |        |           |
| 1506 | 22q12.3  | CACNG2    |            | calcium channel, voltage-dependent, gamma subunit 2 | 138.8     | 22    | rs2267341  | 35306921      |        |           |
| 1507 | 22q12.3  | CACNG2    |            | calcium channel, voltage-dependent, gamma subunit 2 | 138.8     | 22    | rs2283981  | 35316038      |        |           |
| 1508 | 22q12.3  | CACNG2    |            | calcium channel, voltage-dependent, gamma subunit 2 | 138.8     | 22    | rs3788521  | 35322433      |        |           |
| 1509 | 22q12.3  | CACNG2    |            | calcium channel, voltage-dependent, gamma subunit 2 | 138.8     | 22    | rs738977   | 35338874      |        |           |
| 1510 | 22q12.3  | CACNG2    |            | calcium channel, voltage-dependent, gamma subunit 2 | 138.8     | 22    | rs738518   | 35449746      |        |           |
| 1511 | 22q12.3  | CACNG2    |            | calcium channel, voltage-dependent, gamma subunit 2 | 138.8     | 22    | rs3484     | 35526817      |        |           |
| 1512 | 22q12.3  | CACNG2    |            | calcium channel, voltage-dependent, gamma subunit 2 | 138.8     | 22    | rs736720   | 35532777      |        |           |
| 1513 | Xq23     | HTR2C     | 5-HT2C     | 5-hydroxytryptamine (serotonin) receptor 2C         | 326.1     | X     | rs7881868  | 113753140     |        |           |

Key appears on page 109.

|      | K      | L      | M                                                                                                                                  | N       | O       | P       | Q       |
|------|--------|--------|------------------------------------------------------------------------------------------------------------------------------------|---------|---------|---------|---------|
| 1    | Prom** | TFBS** | Association (reference)                                                                                                            | MAF_CEU | MAF_YRI | MAF_JPT | MAF_HCB |
| 1472 |        |        |                                                                                                                                    | 0.01    | 0.00    | 0.07    | 0.06    |
| 1473 |        |        |                                                                                                                                    | 0.08    | 0.00    | 0.39    | 0.17    |
| 1474 |        |        |                                                                                                                                    | 0.18    | 0.43    | 0.18    | 0.18    |
| 1475 |        |        |                                                                                                                                    | 0.21    | 0.08    | 0.05    | 0.13    |
| 1476 |        |        |                                                                                                                                    | 0.44    | 0.28    | 0.33    | 0.40    |
| 1477 |        |        |                                                                                                                                    | 0.28    | 0.46    | 0.24    | 0.28    |
| 1478 |        |        | p=0.0002 (Shifman et al. 2006)                                                                                                     | 0.47    | 0.43    | 0.33    | 0.41    |
| 1479 |        |        | haplotype (Funke et al. 2005; Chen et al. 2004; Meyer-Lindenberg et al. 2006)                                                      | 0.13    |         |         |         |
| 1480 |        |        |                                                                                                                                    | 0.26    | 0.37    | 0.42    | 0.42    |
| 1481 |        |        |                                                                                                                                    | 0.48    | 0.48    | 0.49    | 0.38    |
| 1482 |        |        |                                                                                                                                    | 0.48    | 0.42    | 0.49    | 0.44    |
| 1483 |        |        |                                                                                                                                    | 0.41    |         |         |         |
| 1484 |        |        | p<0.001 (Meyer-Lindenberg et al. 2006), p=0.001 (Schurhoff et al. 2007), p=0.046 (Chen et al. 2004), haplotype (Funke et al. 2005) | 0.48    | 0.29    | 0.24    | 0.26    |
| 1485 |        |        |                                                                                                                                    | 0.22    | 0.15    | 0.41    | 0.36    |
| 1486 |        |        |                                                                                                                                    | 0.34    | 0.22    | 0.13    | 0.18    |
| 1487 |        |        |                                                                                                                                    | 0.19    | 0.34    | 0.47    | 0.46    |
| 1488 |        |        |                                                                                                                                    | 0.03    | 0.22    | 0.34    | 0.34    |
| 1489 |        |        | p=0.0005 (Mukai et al. 2004), haplotype (Chen et al. 2004)                                                                         | 0.33    | 0.47    | 0.44    | 0.32    |
| 1490 |        |        |                                                                                                                                    | 0.03    | 0.05    | 0.10    | 0.04    |
| 1491 |        |        |                                                                                                                                    | 0.37    | 0.34    | 0.32    | 0.34    |
| 1492 |        |        |                                                                                                                                    | 0.21    | 0.01    | 0.21    | 0.31    |
| 1493 |        |        | haplotype (Barrett et al. 2007)                                                                                                    | 0.26    | 0.30    | 0.40    | 0.33    |
| 1494 |        |        | haplotype (Barrett et al. 2007)                                                                                                    | 0.23    | 0.19    | 0.36    | 0.39    |
| 1495 |        |        | haplotype (Barrett et al. 2007)                                                                                                    | 0.12    | 0.04    | 0.23    | 0.23    |
| 1496 |        |        |                                                                                                                                    | 0.11    | 0.04    | 0.43    | 0.33    |
| 1497 |        |        |                                                                                                                                    | 0.32    | 0.00    | 0.00    | 0.00    |
| 1498 |        |        |                                                                                                                                    | 0.01    | 0.00    | 0.00    | 0.00    |
| 1499 |        |        |                                                                                                                                    | 0.03    | 0.43    | 0.05    | 0.01    |
| 1500 |        |        |                                                                                                                                    | 0.02    | 0.40    | 0.05    | 0.01    |
| 1501 |        |        |                                                                                                                                    | 0.27    | 0.13    | 0.35    | 0.43    |
| 1502 |        |        |                                                                                                                                    | 0.33    | 0.10    | 0.34    | 0.39    |
| 1503 |        |        |                                                                                                                                    | 0.35    | 0.10    | 0.25    | 0.28    |
| 1504 |        |        |                                                                                                                                    | 0.03    | 0.48    | 0.01    | 0.01    |
| 1505 |        |        |                                                                                                                                    | 0.23    | 0.08    |         | 0.30    |
| 1506 |        |        | p=0.003 Liang et al. 2005                                                                                                          | 0.38    | 0.44    | 0.18    | 0.21    |
| 1507 |        |        | p=0.003 Liang et al. 2005                                                                                                          | 0.35    | 0.38    |         | 0.21    |
| 1508 |        |        |                                                                                                                                    | 0.09    | 0.19    | 0.09    | 0.07    |
| 1509 |        |        |                                                                                                                                    | 0.21    | 0.42    | 0.02    | 0.02    |
| 1510 |        |        | p=0.005 Liang et al. 2005                                                                                                          | 0.22    | 0.49    | 0.46    | 0.48    |
| 1511 |        |        |                                                                                                                                    | 0.48    | 0.40    |         | 0.35    |
| 1512 |        |        |                                                                                                                                    | 0.45    | 0.34    | 0.15    | 0.16    |
| 1513 |        |        |                                                                                                                                    | 0.16    | 0.12    | 0.06    | 0.03    |

Key appears on page 109.

| 1    | R<br>Sequence                                                                                                                    |
|------|----------------------------------------------------------------------------------------------------------------------------------|
| 1472 | GCTGGGGAGTGGTAGGTGATGAGGGTAGTGAAGGAAGGGGCTGCTGGCCTTGATGGAACCT[A/G]TGATTTCTATGAGAAACGAGAGCTGTGAACAAGGGAGCAGAGGTGAAAAGGACCCCCAGC   |
| 1473 | AGGTCACATGGCCCAAAGACCAGGTTGTTACATGTTGACTGAGTGAAGTCATCTGCCCT[T/C]CTGGGGTGGGAGACCAGGTGAAATATTTAGAAACATAACCAGAAAGCCAAATGGTGATA      |
| 1474 | AATTATAAAAGCCAGGGCTTGCCTCAGCTGGTACTGAAGCATAATTTGATGAGTAAATC[A/T]GCAATGGGACATGCTCTTCTGGCCTAATGTCTGTCTTCCCTCAGCCACAATTAACCATTA     |
| 1475 | CCACACTTAGTGTCCATAACTCAAACACTTTGAAGAATACTTCTTCTCCATACTA[T/C]GCATGTCTGGAAAGGCTCCAAAGGCCAAACAGCCTTCTTTGAGAAGTGCCCATCT              |
| 1476 | CAGGCCCTGGCAAGCACCCATTCTGAACAGGTGCTGCCAGTGGGGAAGGGAGCGATGC[A/G]CGCTCTGGAAGGCACACTGTACTCCGGGGCCCCAGAGGGACTTCGGGACCAGATAGCTTC      |
| 1477 | ACATCTCTATAAAGCTCTGTTACGATGTCCATGTTCCAAATGAGGAACTGAAGAGTGAAG[C/G]AGTAGAACAGATTGAGCCTAGGCAGTGTGGCTCTAGAGCCCATGCTCTTAAGCCACCATA    |
| 1478 | ACGCCCCAAGTGCGGTCTGGGGTGGGAAAGGGCAGGGAGAGGACAGGACCAAGAAGC[A/G]TGCCGAGGTACCCCTGTAGAGGAGCGCAGGCTTTATCTGCAGTTGGGACTGAGGGTCTGG       |
| 1479 | CTACGGTCCCTCAGGCTTGGAGGGTCACTTTAAACAATAAAAAAGCAACAGGACACAAAAA[T/C]CCCTGGCTGAAAAATCCAAAAAGCAGGTCTGTTAGCAGGGCAGGCCCGGAGTGACTTCC    |
| 1480 | ACACAGTGAGACTCCATCTCAAAAAAGAAATAAGGAAATGCTGTGAGAAGCCTACCCCA[T/C]GGTACCTGTCATGGGCCCTTTTTCATTGGTCCCTTTTTGTTGAAGATGAAGCACTTTGCCCT   |
| 1481 | GTCTATTATTAACCTCACTTAGTATGACTCTGAGGTTGAAAGTTACTGAAAACATCTTG[T/G]AAGCTTTTTTAGGCCAATATATTATCAAACGCAATTAACAAAAACAACACTACTAGTTTA     |
| 1482 | GGTGTCAAGCCAGCTGCCTGTGCTCGGCCGACTGTGAGGCACTGAGGATGCCCTCAC[A/G]CGTGCATCTGCATGTGGCGTGCATGTGGCAAGCATGTGCAGGTGCTGTGTGGGCACGATC       |
| 1483 | TTTTCCACCCTTCTGGCTGGCCCCAGTGTGCTCAACACAGAGCTGCCCTCTGTAATC[A/C]CCGAACCCGCCACCTTGGGGCCTGGGGCGGCACTAGTCCCTGAGTCACTCCGTGAGCC         |
| 1484 | ACCATCGAGATCAACCCCGACTGTCCGCCATCACCCAGCGGATGGTGGATTCGCTGGC[A/G]TGAAGGACAAGGTGTGCATGCCTGACCCGTTGTCAGACCTGAAAAAGGGCCGGCTGTGG       |
| 1485 | AGGTGCAAAATGGGTGCGAGAAGTGGGGTGCACACCCCAGACCAGACACCAGGGCAGAAA[T/C]GGCACAGACCAAGGAGATGGGGTGGGGAAGGGCCGCTCTGGGCCAGCCTGCTCTCCC       |
| 1486 | TCCACCTGGTGCTCGCTCACCTGCAGCTCTCCAGAACTGGACACTGCTGTTAGCAGCC[A/G]GACTAGGAGCACGAGGGGCACAGCCCCCATGCCTGGCTAGGTAGGGCCGCTGGACCCTGG      |
| 1487 | GCCTCCCAAAGTCTGGGATTACAGGCGTAGCCACTGCGTCCGGCCGATTCCAGCTTT[T/C]AAAAACAACAAAAACAACAAAACTTTTTCTGGAAAGATCCCTGTGACCTTGTGGAGTGT        |
| 1488 | CCTGGCTCTGTGAGGGTCTAGCCATCCCTCAGTGGGTTCTGTGAGCATCGGAGGCACG[A/G]GGGGTGGGGGCTCAGGAGCAGGTTGCAATTCAAAATCAAGGGCTGCTTTGAGGAGGCCT       |
| 1489 | AAGGCTTGGTTCCTGCCAGGGATCCCCAGTGGGCAGGTGGCCGTCCCTAGGTTGGGAGG[A/G]GGTTTGTCCACAGGCACCTGCTCTGTGCTGCTGCGATGGGGTCTGCGGTGCTCTGGCCTG     |
| 1490 | GTTACAGCAGTGACCTGCAGACCCCGCGCCAGGCAGTGCTGGTGAGGTTGGGGCAGCCAC[A/G]ACTAGGGAGGGATATGGGTTGACCCCTCTGACCTCAGTCTGACAGTGGTCTGCATCCC      |
| 1491 | TGGGTGATGGGACTGGGGAGTCCCTCCTTCACTTTGGCAGACGTGTTATGTTCCACCTTG[T/C]TGCCCCAGCAAGGCCCTTGAATCTGGAGCGTGGTCTGGGGCTGCATCAGCCTTCTAGCC     |
| 1492 | CAAGTCAAATGGCAAATGGGGAAGAGAAGACAGGGTATGGAGTACAAGAGGCCTAGATCC[T/C]CTATAGGTCTGATCTGGCTGGTCTGCCCTAGCCAGTAAAGCCACCCTCCAGACCCCTT      |
| 1493 | cactgttaaatTAGGTGGTAGCTTGGGGATCTCTGAGACATCTTCTTATCTAAAGGTACC[T/C]CTCTACCAAGCTTCCAGTGTCTCTGAACCCACATTAGATATGCATTTCTGAACCCATC      |
| 1494 | TGATTTTCATACTAAGAAATAAATAACAATTATGATGGCCATAATCTATGGAGTGTTG[C/G]ATATGTACACTGCTTCCATATGTGACCTCCTTTATATCTCCCAATTCTAGGAGGAA          |
| 1495 | TGTTTAGAAAAATTAAGCCTGGATGGACAGAGTATCATTTGTTGCTTCCCTCATTT[T/C]TATTTAAAGCAGTTATAAAGAAAGTCCCTCCAGAAAAATCCAGCCGGCTCCCCACCCCA         |
| 1496 | GGCTTGAGCCTCTGTGCCCGACCAATGAATGAGGGGACTTCTTTTTTATTATTATTTTATTTT[A/T]TTTTTTGAGATGGTGTCTCACTCTGTCCCCAGGCTGGAGTGTAGTGGCATGATCTCAG   |
| 1497 | AGAAGGTGATGGTACCAGGTGACATTTGGATCTCCACAAAGAAATATAGAGTACTGCA[A/G]TAATGTAAGGCCATCGAATGTAAGACATTGCATGTCTAAAGCCAAAACAATGCAATA         |
| 1498 | ATGTTTGAATCTATATTCACTTTTAAAGTCTACTTAATGGTGGTCATTTTTTCCCTTTA[A/G]AATATATTAATAGTTGATTTGGGGAGGAAAACTTATTCTGAATATTAACAGTGGTGA        |
| 1499 | CCTGACATTAATTCTTAGGGGATTTTTGTGATTTTTCTTATTTGATGGAATTTTTAT[C/G]TTTTTACAACCCATTATCAGTTTGTGATGAATGTATGCATTTAGGGCCAAAACAATCC         |
| 1500 | GATTTTCTGCAGCCATTACAATTTCTGTAATAAATTTTTTAAAGTTGATTTGTTAA[T/C]TTCCATCAAATAGAAAAAAGAATTCATGTCAGGTGATAAGTTTGGAGCTTTGATTTTGA         |
| 1501 | ttacaggcgtgagccaccgtgccccgctAGATCTGGTTTTAAATCAAACACTCAGAACAT[A/G]ATAAACTTCAAGTGAACCTAAAAAAGGCTTAAAAAAGGCTAGGCATGTGAGTTGTGAATT    |
| 1502 | GGAAGAAGTACGGCGGGTATGGGTGTGCATTTGTGTGCAAGTGTGCAGCTCAATGCCAG[T/G]CCTGTGTCTCATCCCCAGCCACACACTGTGGTGAGCTGGAGCTCAGCATGCTGGCTC        |
| 1503 | TTTTCATTTTGCAGTGGGGCCGAGAAGTATGTAGCTGGTCTGCGGAGGAACCTAGCAC[A/G]ACATGTCACTTGTCAAGAGAGGTAATGTCTCCCATTCAAGTACTAACCAGGCCAACCC        |
| 1504 | AATAGGTTACTTTGGTAGCAGCATCTGGTATAGGATTCCTTGGTCTTATCTGATGATTT[T/C]CCTGTGGCATTAAAGTGTCTTCAATTCTGGATGACTTACTCTTTATATAAACGTTGCCA      |
| 1505 | CTGTCTGAGGAAGCCACCTTTCCATCACAGAGACCCCTGCAGCTCACTGGGACCTTCC[A/G]CTACTCCCTCAAACCTTCAAGCCAGCTCTCACCTCTACAACGGTTTTGCTTTGTTTTT        |
| 1506 | CACAGGGACCCACATACACAGACATGTGCAAACACACAAGCGCTTACACATTCAGACA[T/C]AGACTCAAACACACAGACATGCGGGTACCGAAAGACAGAACACAGCACAGACTCAT          |
| 1507 | AGGCATCTTTATAAAGAATCTGTGCAGGAGTGAAGGCTCAGAGAGCAGTACTGACATGCCCT[T/C]GAGCGTCCCACAAATGAGGACAGAGCTTACCCAGCAGGGCCCCAGCTGCATCCTGGT     |
| 1508 | TTGGATGGTTTGAACAACAGAACGTGTGGCATCCTATGAGTTGATCGTTCTCTCGTT[C/G]TTCATTCATTCTTTCAGTGGGTAGTTCTTTCTTTTTTTGTTTTTGGGAAGGAGGGAGG         |
| 1509 | GAATGAACTTTGGAAATCACAGCATTAGCGGGAAAGGATGTGCTAATGGATGAAATACC[T/C]GCAGCCGGTAAACCACTGGTAAAAAGCATCCTCTCCCAAGCTTAGGACAAAAGACTTCTT     |
| 1510 | ATGAAATGGAATGGGCTCAGACCAGGAGCCAGTGTGTTGAAATGCCGCTGTGAGACAAAGGG[T/C]GAGTGACTTACCTGCTGAAACCTCCGCTTCTTCTGAAATGACAGAATGCCTCCATTT     |
| 1511 | CAGGGGATGGGGGAGTAAAAAATAACATAAACGAACACTGAACAGAAATGCAAGGAGGGTGGC[A/G]AGAGGGGCCGAGATTGGGTGTTGAGGGCAGAGAGGTGGAAGACCAGGGGCAGTCACTGCT |
| 1512 | GTTCTGGGGCTCACTCTGTACCAGGCACCGCAGGTGTGTTATCCATTTTCATCCTCGT[C/A/G]GCTCTTATCTTCAATTTGTTTACAGAGAACTGAGGCTGAGTGTCACTGTGCTCACTCA      |
| 1513 | TTTGATCATGCTTTATGTGTTTGGGAAATTTTTGATGTTTAAACATGTCAAATATTAAT[T/C]GTCTTGCACCAATTTATTTGCTCTACTGCAAAAAATATAGCTGGCTAATATTTATTTCA      |

Complete list of all 94 genes and 1,536 SNPs present on the COGS SNP Chip

|      | A                                                                                                                                                                     | B         | C          | D                                                  | E         | F     | G          | H             | I      | J      |
|------|-----------------------------------------------------------------------------------------------------------------------------------------------------------------------|-----------|------------|----------------------------------------------------|-----------|-------|------------|---------------|--------|--------|
| 1    | Cytoband                                                                                                                                                              | Gene Name | Gene Alias | Description                                        | Size (kb) | Chrom | SNP ID     | Position (bp) | htSNP* | Coding |
| 1514 | Xq23                                                                                                                                                                  | HTR2C     | 5-HT2C     | 5-hydroxytryptamine (serotonin) receptor 2C        | 326.1     | X     | rs2192372  | 113798029     |        |        |
| 1515 | Xq23                                                                                                                                                                  | HTR2C     | 5-HT2C     | 5-hydroxytryptamine (serotonin) receptor 2C        | 326.1     | X     | rs5988087  | 113841112     |        |        |
| 1516 | Xq23                                                                                                                                                                  | HTR2C     | 5-HT2C     | 5-hydroxytryptamine (serotonin) receptor 2C        | 326.1     | X     | rs6318     | 113871991     |        |        |
| 1517 | Xq23                                                                                                                                                                  | HTR2C     | 5-HT2C     | 5-hydroxytryptamine (serotonin) receptor 2C        | 326.1     | X     | rs2428707  | 113906615     |        |        |
| 1518 | Xq23                                                                                                                                                                  | HTR2C     | 5-HT2C     | 5-hydroxytryptamine (serotonin) receptor 2C        | 326.1     | X     | rs2497504  | 113930668     |        |        |
| 1519 | Xq23                                                                                                                                                                  | HTR2C     | 5-HT2C     | 5-hydroxytryptamine (serotonin) receptor 2C        | 326.1     | X     | rs4243981  | 113963054     |        |        |
| 1520 | Xq23                                                                                                                                                                  | HTR2C     | 5-HT2C     | 5-hydroxytryptamine (serotonin) receptor 2C        | 326.1     | X     | rs4272555  | 113989881     |        |        |
| 1521 | Xq23                                                                                                                                                                  | HTR2C     | 5-HT2C     | 5-hydroxytryptamine (serotonin) receptor 2C        | 326.1     | X     | rs5946017  | 114018929     |        |        |
| 1522 | Xq23                                                                                                                                                                  | HTR2C     | 5-HT2C     | 5-hydroxytryptamine (serotonin) receptor 2C        | 326.1     | X     | rs1801412  | 114048960     |        |        |
| 1523 | Xq28                                                                                                                                                                  | GABRA3    |            | gamma-aminobutyric acid (GABA) A receptor, alpha 3 | 285.6     | X     | rs1491793  | 151084760     |        |        |
| 1524 | Xq28                                                                                                                                                                  | GABRA3    |            | gamma-aminobutyric acid (GABA) A receptor, alpha 3 | 285.6     | X     | rs6653441  | 151103823     |        |        |
| 1525 | Xq28                                                                                                                                                                  | GABRA3    |            | gamma-aminobutyric acid (GABA) A receptor, alpha 3 | 285.6     | X     | rs5925135  | 151120197     |        |        |
| 1526 | Xq28                                                                                                                                                                  | GABRA3    |            | gamma-aminobutyric acid (GABA) A receptor, alpha 3 | 285.6     | X     | rs994424   | 151132436     |        |        |
| 1527 | Xq28                                                                                                                                                                  | GABRA3    |            | gamma-aminobutyric acid (GABA) A receptor, alpha 3 | 285.6     | X     | rs2194897  | 151163760     |        |        |
| 1528 | Xq28                                                                                                                                                                  | GABRA3    |            | gamma-aminobutyric acid (GABA) A receptor, alpha 3 | 285.6     | X     | rs5970247  | 151177001     |        |        |
| 1529 | Xq28                                                                                                                                                                  | GABRA3    |            | gamma-aminobutyric acid (GABA) A receptor, alpha 3 | 285.6     | X     | rs1492302  | 151207321     |        |        |
| 1530 | Xq28                                                                                                                                                                  | GABRA3    |            | gamma-aminobutyric acid (GABA) A receptor, alpha 3 | 285.6     | X     | rs6627574  | 151221892     |        |        |
| 1531 | Xq28                                                                                                                                                                  | GABRA3    |            | gamma-aminobutyric acid (GABA) A receptor, alpha 3 | 285.6     | X     | rs1492293  | 151243408     |        |        |
| 1532 | Xq28                                                                                                                                                                  | GABRA3    |            | gamma-aminobutyric acid (GABA) A receptor, alpha 3 | 285.6     | X     | rs6653443  | 151259417     |        |        |
| 1533 | Xq28                                                                                                                                                                  | GABRA3    |            | gamma-aminobutyric acid (GABA) A receptor, alpha 3 | 285.6     | X     | rs389292   | 151292110     |        |        |
| 1534 | Xq28                                                                                                                                                                  | GABRA3    |            | gamma-aminobutyric acid (GABA) A receptor, alpha 3 | 285.6     | X     | rs6526104  | 151314578     |        |        |
| 1535 | Xq28                                                                                                                                                                  | GABRA3    |            | gamma-aminobutyric acid (GABA) A receptor, alpha 3 | 285.6     | X     | rs11094580 | 151343175     |        |        |
| 1536 | Xq28                                                                                                                                                                  | GABRA3    |            | gamma-aminobutyric acid (GABA) A receptor, alpha 3 | 285.6     | X     | rs7065528  | 151355822     |        |        |
| 1537 | Xq28                                                                                                                                                                  | GABRA3    |            | gamma-aminobutyric acid (GABA) A receptor, alpha 3 | 285.6     | X     | rs6627595  | 151368659     |        |        |
| 1538 |                                                                                                                                                                       |           |            |                                                    |           |       |            |               |        |        |
| 1539 | Key: htSNP=haplotype tagging SNP; Coding=nonsynonymous or synonymous coding sequence variant ; Prom=promoter variant; TFBS=transcription factor binding site variant; |           |            |                                                    |           |       |            |               |        |        |
| 1540 | MAF=minor allele frequency; CEU=CEPH/Caucasian; YRI=Yoruban/African; JPT=Japanese; HCB=Chinese                                                                        |           |            |                                                    |           |       |            |               |        |        |
| 1541 | *T=TAGGER SNP selection method (de Bakker et al. 2005); G=Gabriel SNP selection method (Gabriel et al. 2002); **Y=yes                                                 |           |            |                                                    |           |       |            |               |        |        |

Key appears on page 109.

|      | K      | L      | M                       | N       | O       | P       | Q       |
|------|--------|--------|-------------------------|---------|---------|---------|---------|
| 1    | Prom** | TFBS** | Association (reference) | MAF_CEU | MAF_YRI | MAF_JPT | MAF_HCB |
| 1514 |        |        |                         | 0.46    | 0.48    | 0.15    | 0.18    |
| 1515 |        |        |                         | 0.16    | 0.32    | 0.06    | 0.03    |
| 1516 |        |        |                         | 0.16    | 0.47    | 0.06    | 0.03    |
| 1517 |        |        |                         | 0.14    | 0.39    | 0.03    | 0.03    |
| 1518 |        |        |                         | 0.14    | 0.44    | 0.03    | 0.03    |
| 1519 |        |        |                         | 0.14    | 0.47    | 0.03    | 0.03    |
| 1520 |        |        |                         | 0.14    | 0.46    | 0.03    | 0.03    |
| 1521 |        |        |                         | 0.14    | 0.46    | 0.03    | 0.03    |
| 1522 |        |        |                         | 0.13    | 0.00    | 0.08    | 0.02    |
| 1523 |        |        |                         | 0.23    | 0.14    | 0.07    | 0.10    |
| 1524 |        |        |                         | 0.23    | 0.36    | 0.07    | 0.10    |
| 1525 |        |        |                         | 0.22    | 0.49    | 0.24    | 0.38    |
| 1526 |        |        |                         | 0.22    | 0.38    | 0.41    | 0.40    |
| 1527 |        |        |                         | 0.21    | 0.37    | 0.40    | 0.42    |
| 1528 |        |        |                         | 0.13    | 0.43    | 0.25    | 0.12    |
| 1529 |        |        |                         | 0.10    | 0.21    | 0.06    | 0.11    |
| 1530 |        |        |                         | 0.13    | 0.42    | 0.30    | 0.28    |
| 1531 |        |        |                         | 0.13    | 0.36    | 0.30    | 0.28    |
| 1532 |        |        |                         | 0.13    | 0.44    | 0.30    | 0.29    |
| 1533 |        |        |                         | 0.37    | 0.04    | 0.21    | 0.32    |
| 1534 |        |        |                         | 0.43    | 0.28    | 0.25    | 0.27    |
| 1535 |        |        |                         | 0.43    | 0.10    | 0.23    | 0.27    |
| 1536 |        |        |                         | 0.18    | 0.42    | 0.48    | 0.33    |
| 1537 |        |        |                         | 0.48    | 0.42    | 0.36    | 0.41    |
| 1538 |        |        |                         |         |         |         |         |
| 1539 |        |        |                         |         |         |         |         |
| 1540 |        |        |                         |         |         |         |         |
| 1541 |        |        |                         |         |         |         |         |

Key appears on page 109.

|      | R                                                                                                                              |
|------|--------------------------------------------------------------------------------------------------------------------------------|
| 1    | Sequence                                                                                                                       |
| 1514 | ATGATGAAATGGAACAAGAAAAATTGTCTCCCAGCAAATATTTAGACATGTGACATTTT[A/G]TGTTTTAAAGGTCATTGATATTTAGGGTATTTATCTTAACTACTTAATATTTTAAAT      |
| 1515 | CTACCCTGCAGAAAGAGAAGCCTCAAGGATGTTTTGCTGATGGGATCTGAATCAATATAA[T/C]GGCTTTAAATGAATTGGACATGCTCATTTTACCCACATCTACTCCCTGATTTTCTGAA    |
| 1516 | GATTGTTTTTTTTTCTTAATTTTCAGTGTGCACCTAATTGGCCTATTGGTTGGCAAT[C/G]TGATATTTCTGTGAGCCCAGTAGCAGCTATAGTAACTGACATTTTCAATACCTCCGATGG     |
| 1517 | TAGGCAGGTGTTAATAGAGTCTGAACTGAACTGAAATAAAATTTTGTAGTAAAGCTAT[A/G]GTTCTAAAACAGTGTGTATCAGCTAGGACCATGTACAGTACTAATAAGTACACAATAACT    |
| 1518 | TAGTAGGCAATACTTACATGTTGCTTACTATGTGCCAGGCACTGTTACAGGTGCTTTGTC[C/G]TCATACACGATTCCTTATATCCCATACCTAAGGTGCCTTAGTCCGCATATCAAGTGAGGC  |
| 1519 | TTTTTTCTATTGACTTAGAAATCACTCTACATTAATGACATAGTCAAAGAGATTTTACT[T/C]TTGTTCTCTTGTAATAAAAATACCAGATTAAGGTATGCTTAATGTGATAAAGTAAAGCC    |
| 1520 | AACAAGATCAAGACTTCTATTTAATCTTCACTAATATCATCTAAATATTTTACTCTGGG[T/C]TTATTGATCAAATACATTTAAGTTTTAAGATTGTTCTATTGTAGATTGTTCTGCCTGTGT   |
| 1521 | GGTGTGATGTCTTCTATTTAATACTATTATTGTATTCTATTTCTCCCATCAGTTTTGG[T/G]AATACTTGCTTTATATATTTGTGCTTCAGAGTTGAGAGCATATATTTTACCATTGTTAT     |
| 1522 | CAGAAGTGAAGGATAATGAGATGTAATACACCAAATAGCTTTTCACTTCTTAAGGACAG[T/G]GTTCAAATTCTGATTATTACAACAAGCAAACCTGAAATTAGTGTTCATTCTGGTCCCTTA   |
| 1523 | ATCTCCTCAATTTAGGATCCAACCTTTCCCATGCTAGAACTGGAGTTGGGGCACTAATGA[A/T]CCTGTGTACATCAAGGGAGACCCTGCCACATGGA                            |
| 1524 | GAATTTCTCCCGGTTATGTTTTACTGCAGTTCGATAAATCAGTTATTATAACCTCCATC[A/C]ATGTTCACTTCTTATAGCTATGTTAATATCTTGTCTGACTGACATCCCTGTCTTC        |
| 1525 | CTATCCGGTCCAGTGTGAAATTGTCAAAGGGACAATGGAAAGACACTTTTGTATATTCA[T/C]GAGTATTCACAACCTAGATCATTTCTATGGGTGGAACCTACAAGTGGACTTTTAGAAAGC   |
| 1526 | CAGTCTTTTCTCACTAGACTGTAAGCTCAATGAGGTGATGAGGCCTCAGATGTTTTATGA[T/C]CGCTGTATCTTCACTATCTAATATGATGCCTTGATATTTGTTGAACGGGTAAGTATTAA   |
| 1527 | ATAAGTTCTGTTGTTATAAATTACCCAGTCTAAGGTGTTTTATTATAGCAGTTCAAATG[C/G]ATTAAGACAGTGCCATTGCTTCCGACCCACGAGAGTACACTTCTGAAAAGTGAGGT       |
| 1528 | GAGAAAGTGTCTACTGAAATGTAGCAACCTCAAATTCTAATCATATGTGGGATTGAC[A/G]TCCGAATATATACTGTCTGCCTGATCTGAAGTTTACAAGCTGAAAACCTAACACAAAAAT     |
| 1529 | TAGCCAGAAAATGGGGCTAGACATCAAGGCATAGTGGTCCCCGTGTAGAACACTGGAGTC[A/G]TGTCAAATATCCCTGCTTTTGCCTGGGCTTGGAATAGAGGCCTGTGGATGGTAACATAAA  |
| 1530 | GTAGTTTTTCAACCCTTTCCCACTGCCTCCCCCATTCTCTGTAGTCCCAGGGTCTA[T/C]TGTTTTCATCTTTATGTCTGTGTATGCCCTATGTTTAGCTCCCACCTGTAAGTGAGAACT      |
| 1531 | TATCTGTTTTTCCAAAGCTTACGTATTTTTGTTTACCAGTCTGACCCAGAATTTTACTGC[T/C]GATTGATATTGATATTAGCCTTAATAAAGAAAGTATTCTATATAACTAATTAAGCCTATC  |
| 1532 | TATTATCTCACTTTCTGTGTAATACAAAACCTGTTCAATGGCATATTTCCACTTCTTTGTG[A/C]TTTCATTGACATACATTTTCCCTGTACATATATTACAAGCTACACAATACATGGTTATTA |
| 1533 | ATCTCATTTTTTCAATGCCACGTTGAAACCATCTCTCATCTATGCATGTGCACCACAGTC[T/C]TTCTATTTGAGGTTTCATGCCTCCTATCTGTATCACTCTCTGCCTTTCAATCTTACGTCT  |
| 1534 | TTAATGATGGGTGAGCAATATCTATGATGATACACAGAGAATCAATTAGTATACACATA[A/C]AATACACAAGCAGTTGGCTATCCTTCAGGAGTGGTATCCATTGACACGCATGTCCCTATC   |
| 1535 | TATTAATTTGAAAGTTAGCTATTTAGGGTTGTGGGAAAAGAACATGATTCATAGGGATT[A/G]TAATAAGAACAATTTTGTATTGTGTATCTTTATTTTTTCAATTTATTTTTGAACTGTGTG   |
| 1536 | ACATACTCTTGTCAACAAATGGGGCTGAAAAACTGGACATACATAAGGAAAAATATATT[A/G]TATATGCCTGGAACATTACCTTGCTCCAAAGGCAAAAGTCATCTAAACATGCACCAAAGA   |
| 1537 | GTTTTTAAAGGTGCAGTTGGAGCATGTTGGGTGGATGAGGCTATAAAAAGTGAAGTAC[C/G]ATTTTCAAGGAAAGGAAGCTGACCAATCAAAGTCTTTTGGGCAGCCCTCCAGAAATCCA     |
| 1538 |                                                                                                                                |
| 1539 |                                                                                                                                |
| 1540 |                                                                                                                                |
| 1541 |                                                                                                                                |
